# Supplementary material for: Organocatalytic reductive coupling of aldehydes with 1,1-diarylethylenes using an in situ generated pyridine-boryl radical
Source: PubMed Central journal article supplement — Chem Sci. 2018 Feb 28;9(15):3664–71. doi: 10.1039/c7sc05225a (PMC5933217; doi:10.1039/c7sc05225a), 2018-02-28
Supplement: SC-009-C7SC05225A-s001.pdf [file SC-009-C7SC05225A-s001.pdf]

## Supporting Information

# Organocatalytic Reductive Coupling of Aldehydes with 1,1-Diarylethylenes Using the *in situ* Generated Pyridine-Boryl Radical

Jia Cao,<sup>†</sup> Guoqiang Wang,<sup>†</sup> Liuzhou Gao, Xu Cheng, and Shuhua Li\*

[\*] J. Cao,<sup>[†]</sup> G. Wang,<sup>[†]</sup> L. Gao, Prof. Dr. S. Li

*Key Laboratory of Mesoscopic Chemistry of Ministry of Education, Institute of Theoretical and Computational Chemistry, School of Chemistry and Chemical Engineering, Nanjing University, Nanjing, 210093 (P. R. China)*

E-mail: shuhua@nju.edu.cn

Prof. Dr. X. Cheng.

*Institute of Chemistry and Biomedical Sciences, Jiangsu Key Laboratory of Advanced Organic Material, School of Chemistry and Chemical Engineering, Nanjing University, Nanjing, 210093 (P. R. China)*

J. Cao

*School of Chemistry and Chemical Engineering, Yan'an University, Yan'an 716000 (P. R. China)*

[†] These authors contributed equally to this work.

## Table of Contents

|                                                                                |             |
|--------------------------------------------------------------------------------|-------------|
| <b>1. Computational Investigations .....</b>                                   | <b>S2</b>   |
| <b>2. Experimental Studies on Substrate Scope .....</b>                        | <b>S14</b>  |
| <b>3. Experimental Studies on the Reaction Mechanism .....</b>                 | <b>S19</b>  |
| <b>4. Spectroscopic Characterization of the Coupling Products .....</b>        | <b>S23</b>  |
| <b>5. NMR Spectra .....</b>                                                    | <b>S51</b>  |
| <b>6. Cartesian Coordinates and Energies of the Optimized Structures .....</b> | <b>S97</b>  |
| <b>7. References .....</b>                                                     | <b>S259</b> |

# 1. Computational Investigations

## 1.1 Computational Details

All calculations were performed with the Gaussian 09 package.<sup>[1]</sup> Geometry optimizations and vibrational frequencies of all the stationary points were calculated by using the M06-2X<sup>[2]</sup>/6-31G(d,p) method. A “broken-symmetry” guess was used for calculations on open-shell systems. Each of the species was identified to be a minimum (number of imaginary frequencies, NIMAG=0) or a transition state (NIMAG=1). To confirm that each transition state connects the desired reactants and products along the reaction path, we performed intrinsic reaction coordinate (IRC)<sup>[3]</sup> calculations at the M06-2X/6-31G(d,p) level of theory. In order to obtain reliable energies, single point energies (Esol) were computed at the M06-2X/cc-PVTZ level. The solvent effect was treated with the polarizable continuum model (PCM) with benzene as the solvent.<sup>[4]</sup> The 3D structures were generated with CLY view.<sup>[5]</sup>

## 1.2 Revisit on the pathway for the reaction of 4-cyanopyridine and B<sub>2</sub>(pin)<sub>2</sub>.

Recently, Tang and co-workers reported that the reaction between isoquinolines and B<sub>2</sub>(pin)<sub>2</sub> was proposed through a [3,3]-sigmatropic rearrangement mechanism.<sup>[6]</sup> In this work, we reinvestigated the possible pathway for the formation of the pyridine-boryl radical using 4-cyanopyridine and B<sub>2</sub>(pin)<sub>2</sub>. Surprisingly, an intermediate, IntA3, was located along the pathway (Figure S1). Then, two transition states, one for the [3,3]-sigmatropic rearrangement process, another for the homolytic cleavage of C-C bond (to generate two pyridine-boryl radicals), were successfully determined. IRC calculations for the first transition state indicate that a [3,3]-sigmatropic rearrangement process is involved, in which the breaking of the B-B bond is concomitant with the formation of the C-C bond (Figure S2). This step-wise picture is different from the concerted step reported in our previous study, in which the key intermediate IntA3, was not found.<sup>[7]</sup> Thus, the formation of the pyridine-boryl radical proceed through a [3,3]-sigmatropic rearrangement/homolytic C-C bond cleavage pathway (as shown in Figure S1 and Scheme S1).

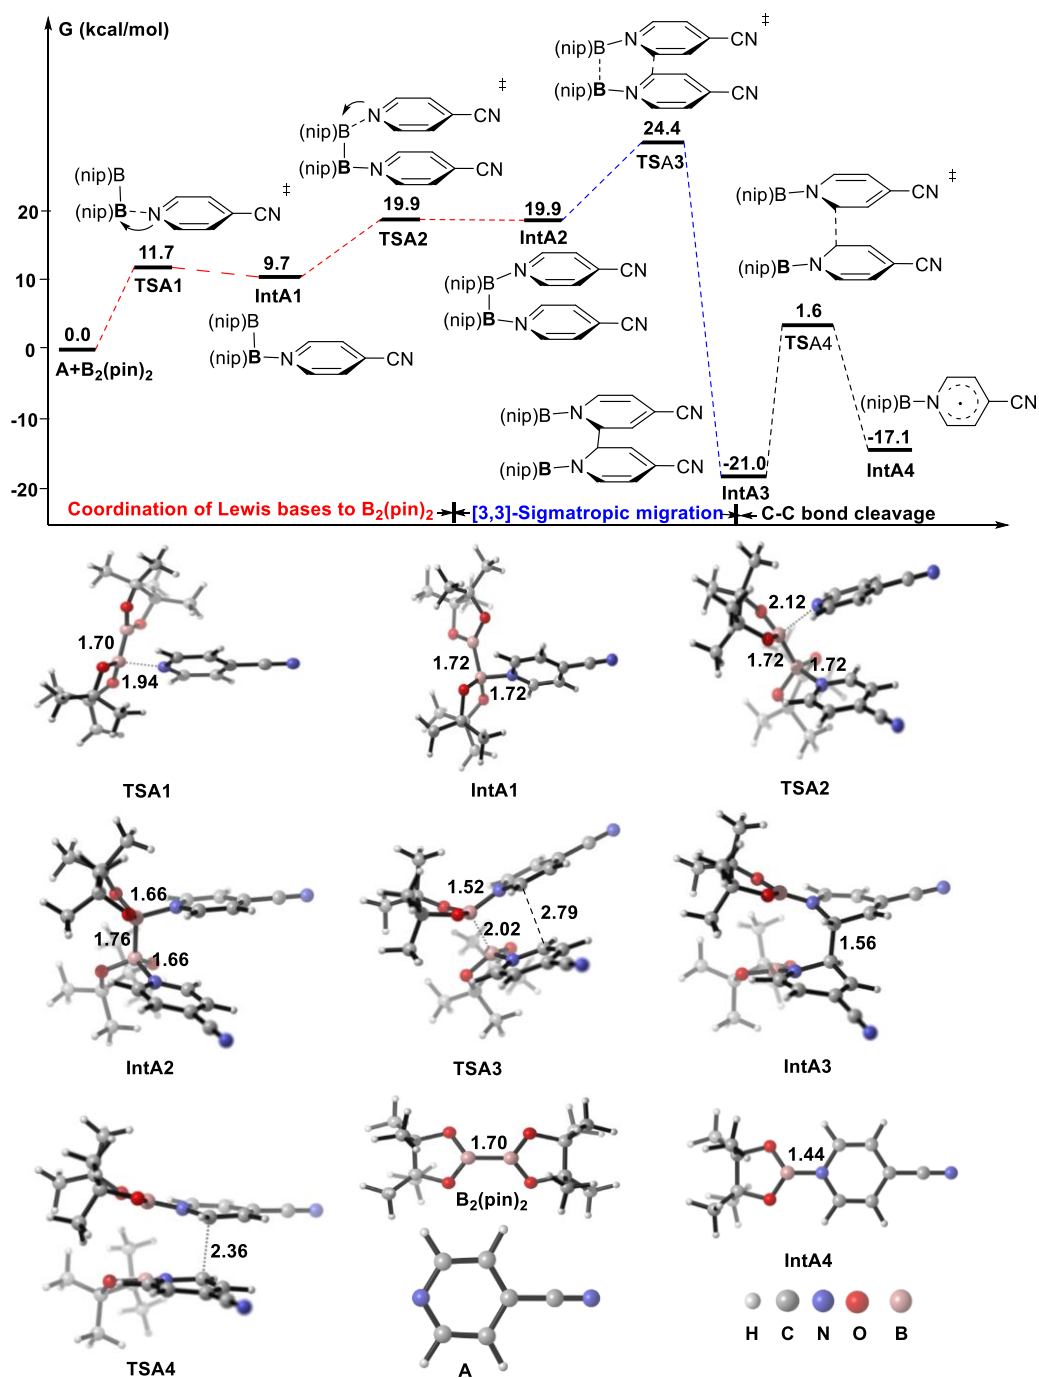

**Figure S1.** Computed Gibbs energy profile for 4-cyanopyridine (A) catalyzed formation of the pyridine-boryl radical using  $B_2(\text{pin})_2$  in the benzene. Interatomic distances are in Å.

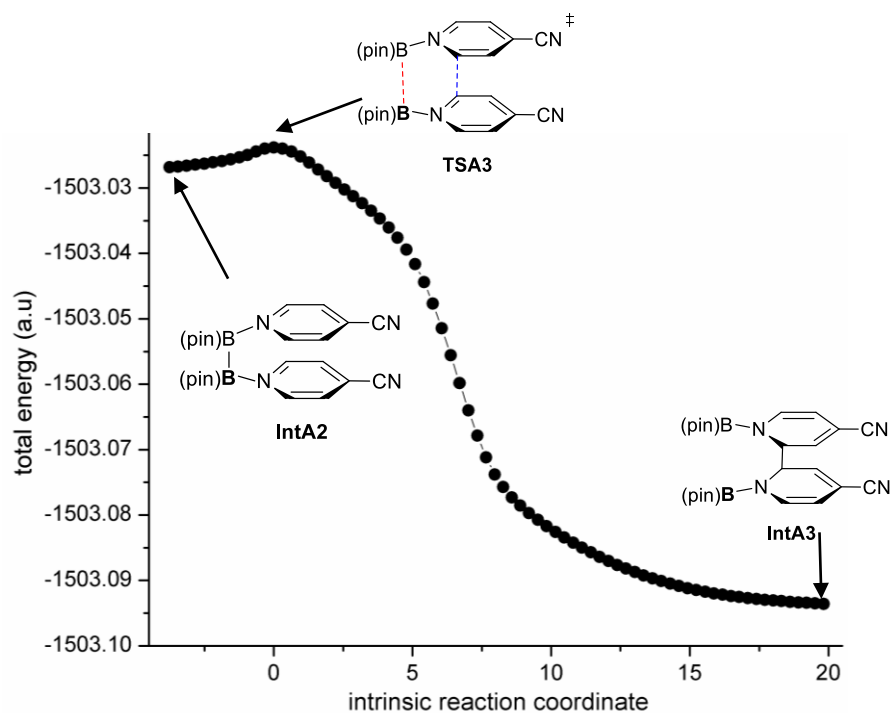

**Figure S2.** IRC analysis starting from the [3,3]-sigmatropic rearrangement transition state (TSA3).

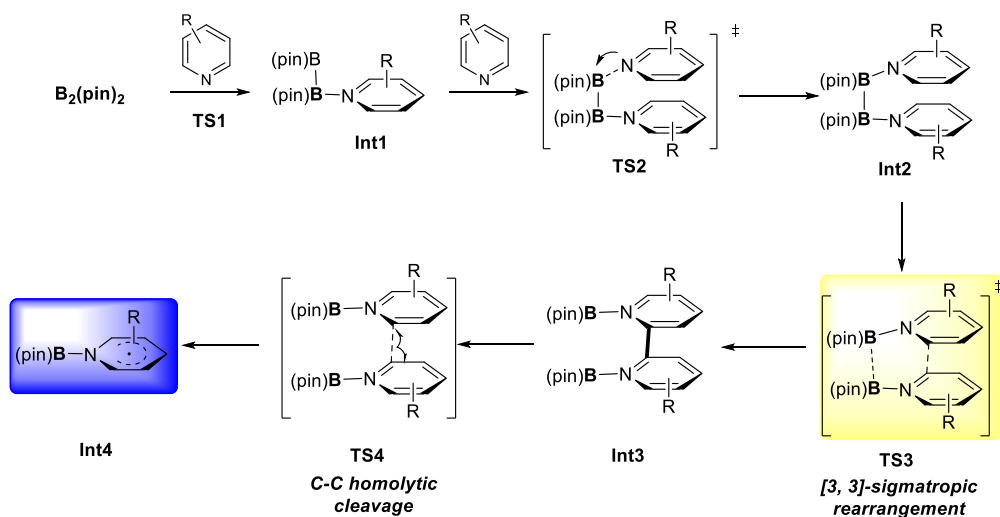

**Scheme S1.** Proposed pathway for the formation of the pyridine-boryl radical via a [3,3]-sigmatropic rearrangement/ homolytic cleavage of the C-C bond mechanism..



### 1.3 Catalyst selection for the formation of the pyridine-boryl radical using pyridine and B<sub>2</sub>(pin)<sub>2</sub>

Then, we performed density functional theory (DFT) calculations to search the suitable substituted pyridine for the formation of pyridine-boryl radical using B<sub>2</sub>(pin)<sub>2</sub>. As shown in Figure S2 and Figure S3-S12, the [3,3]-sigmatropic rearrangement (*via* TS3) is the rate-determining step (*r.d.s.*) for the formation of the corresponding pyridine-boryl radical. As shown in Figure S1, five pyridines (**A**, **B**, **C**, **D**, **E**) with free energy barriers (*r.d.s.*) of no more than 28.5 kcal/mol are possible candidates for the formation of the pyridine-boryl radical.

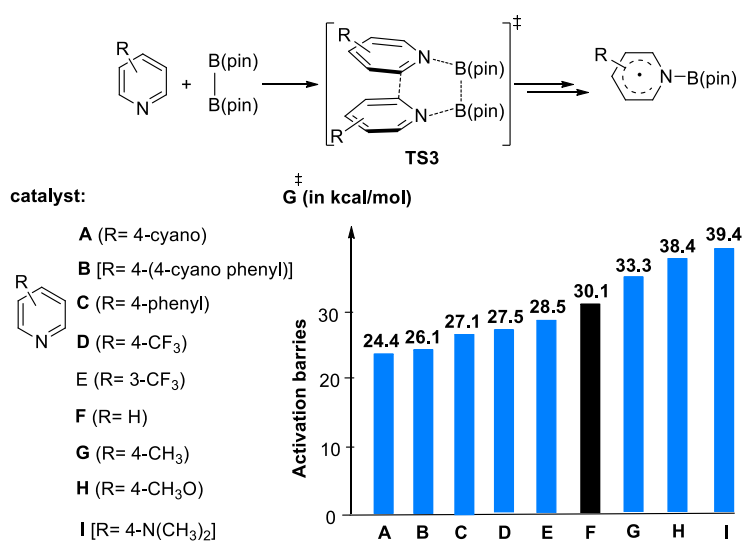

**Figure S3.** Activation barrier for rate-determining step (TS3) for the formation of pyridine-boryl radical.

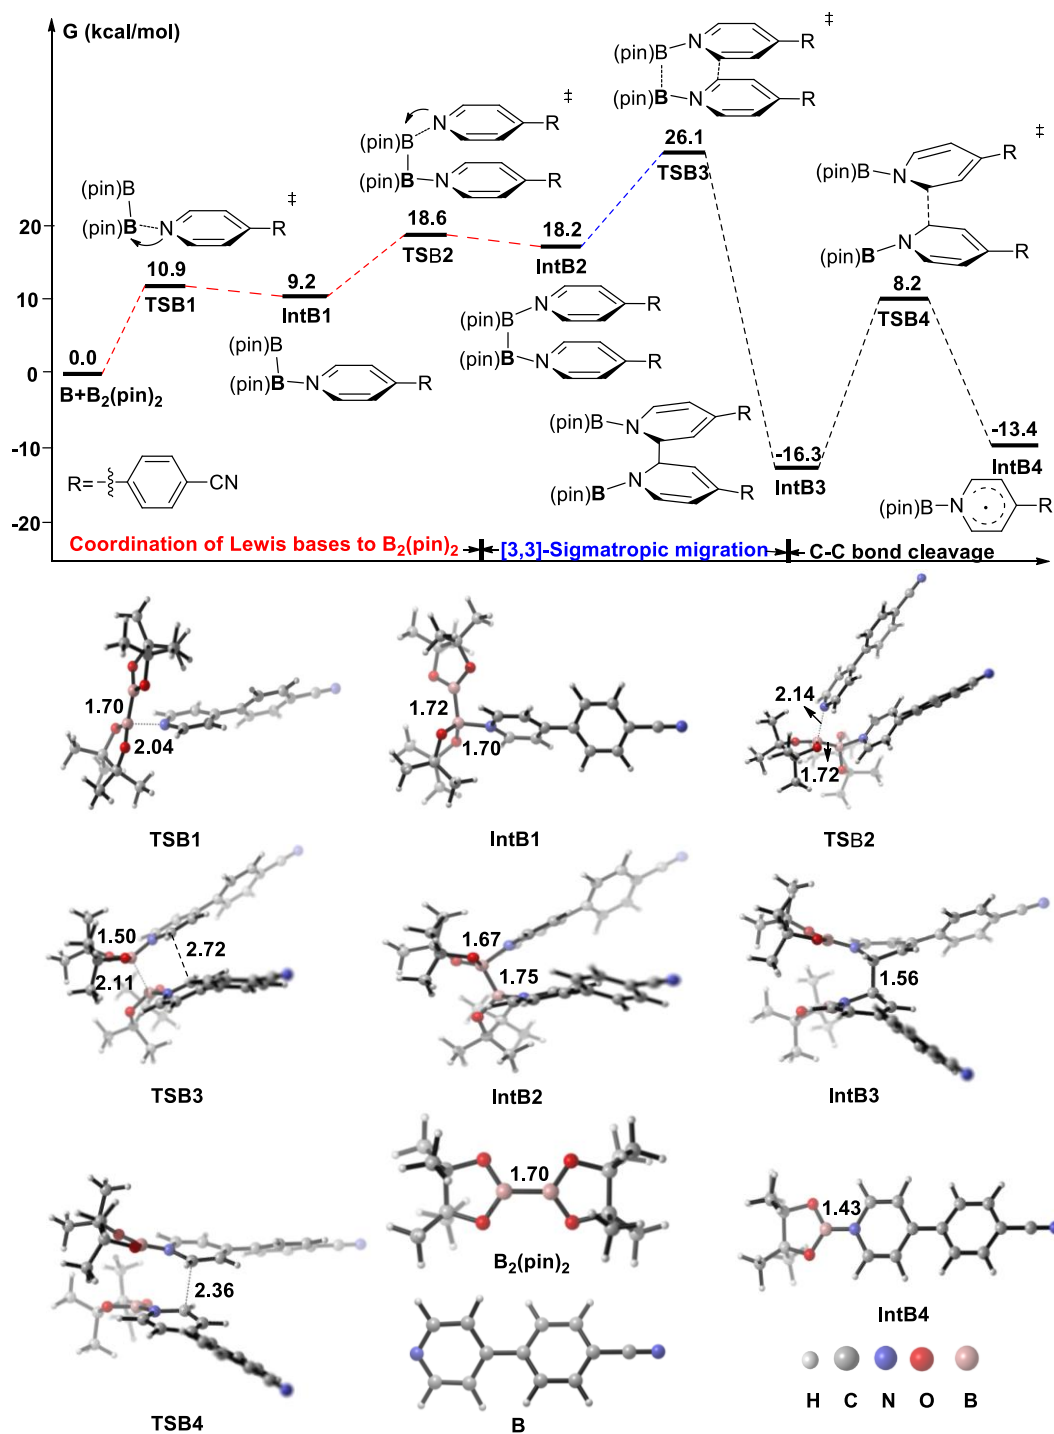

**Figure S4.** Computed Gibbs energy profile for 4-(4-pyridinyl)benzocnitrile (**B**) catalyzed formation of the pyridine-boryl radical using  $B_2(\text{pin})_2$  in the benzene. Interatomic distances are in Å.

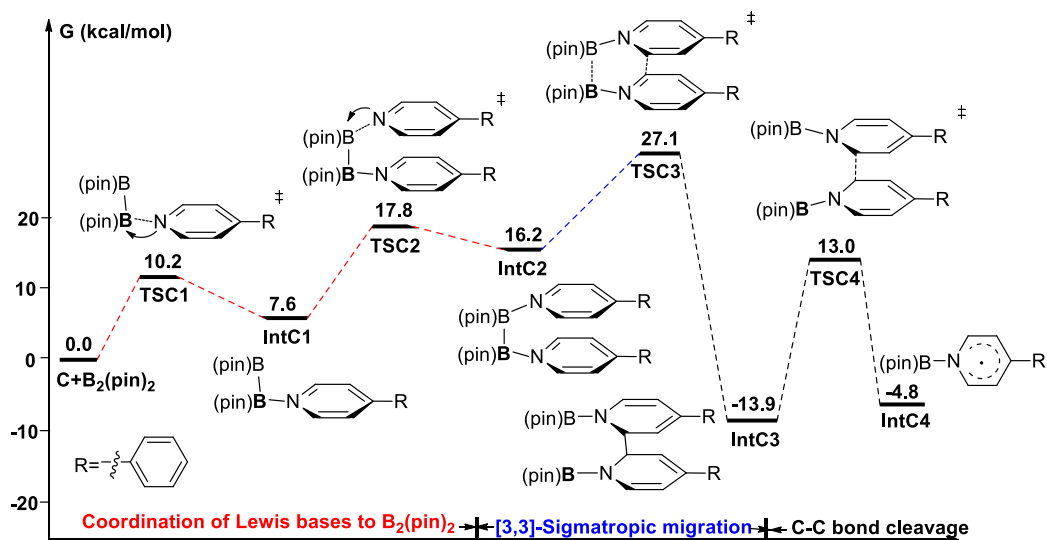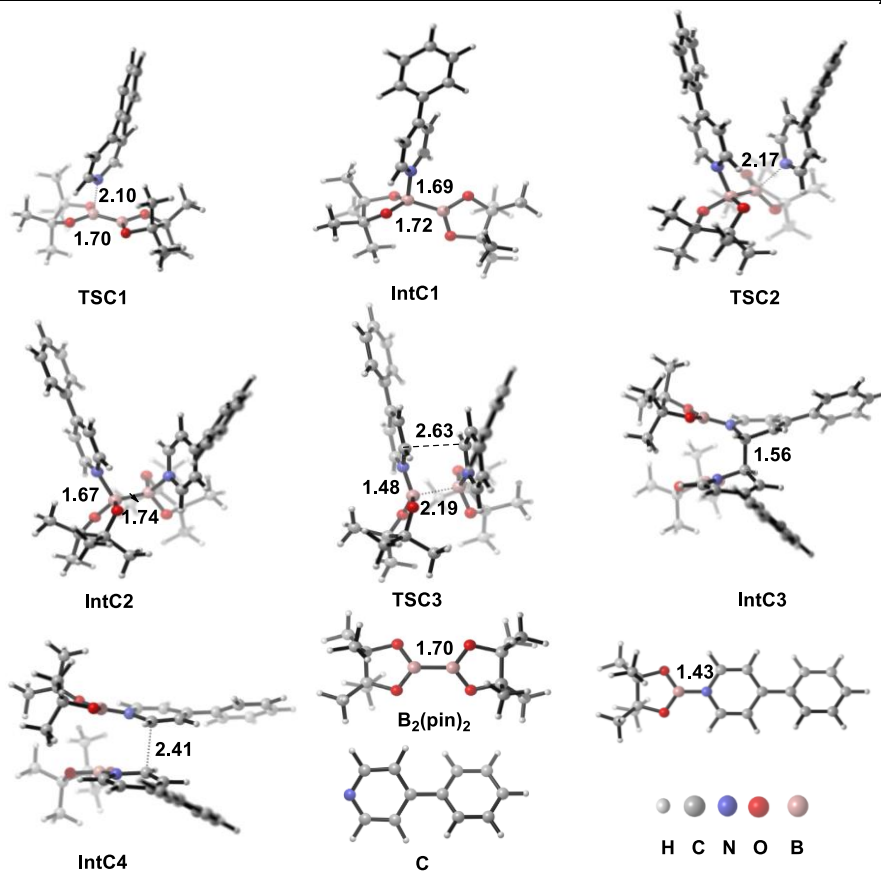

**Figure S5.** Computed Gibbs energy profile for 4-phenylpyridine (C) catalyzed formation of the pyridine-boryl radical using  $B_2(\text{pin})_2$  in the benzene. Interatomic distances are in Å.

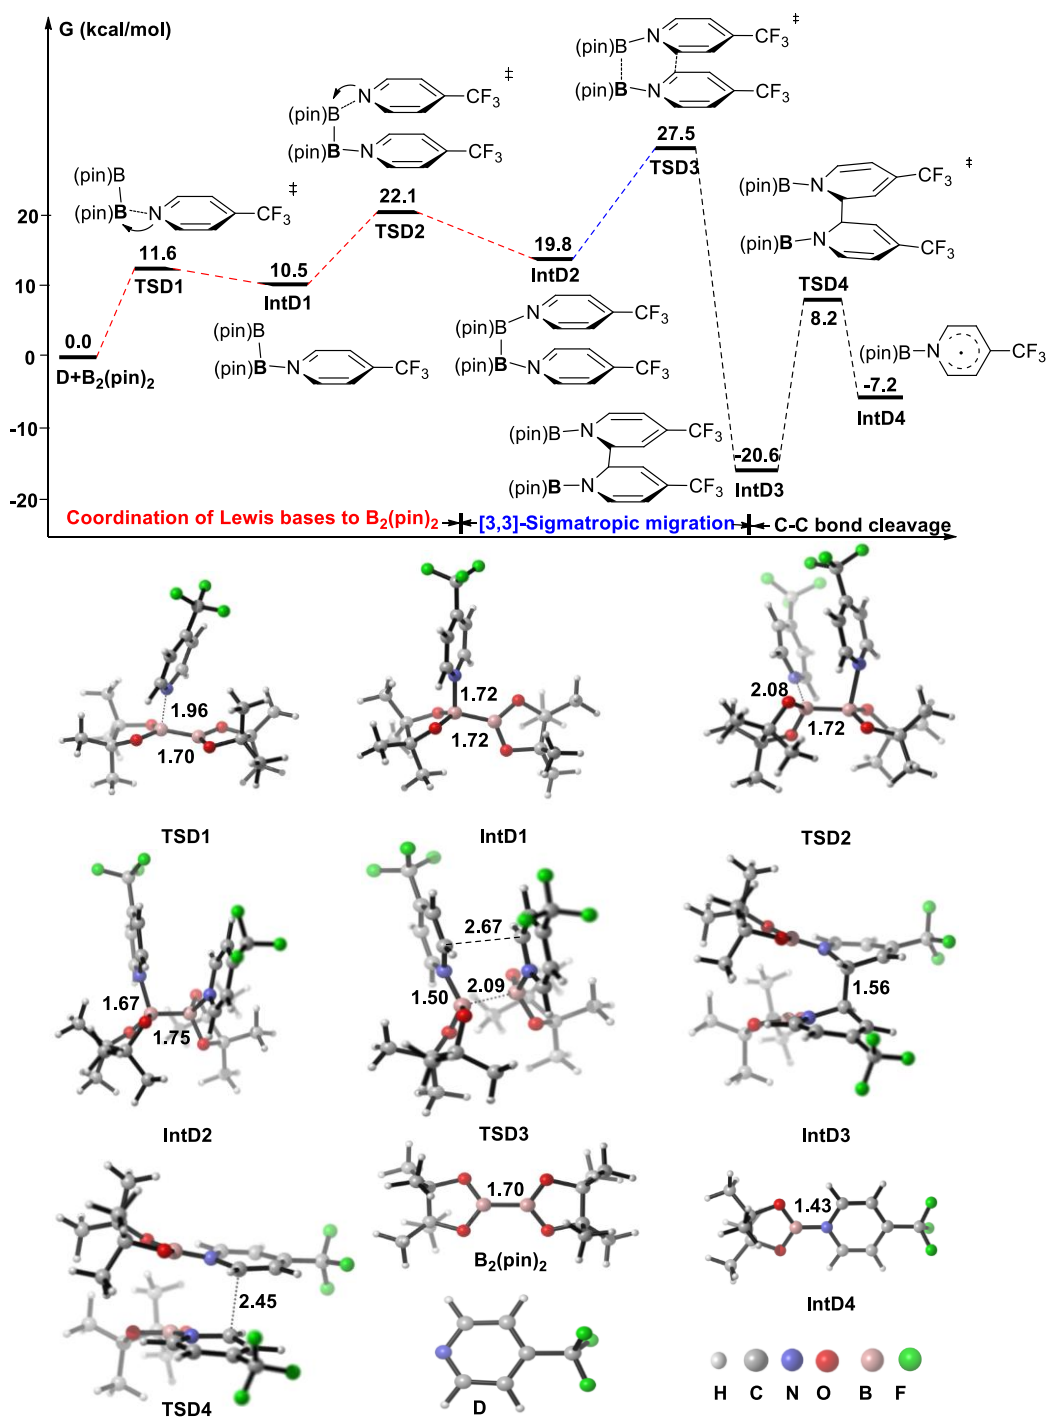

**Figure S6.** Computed Gibbs energy profile for 4-(trifluoromethyl)pyridine (**D**) catalyzed formation of the pyridine-boryl radical using  $B_2(\text{pin})_2$  in the benzene. Interatomic distances are in Å.

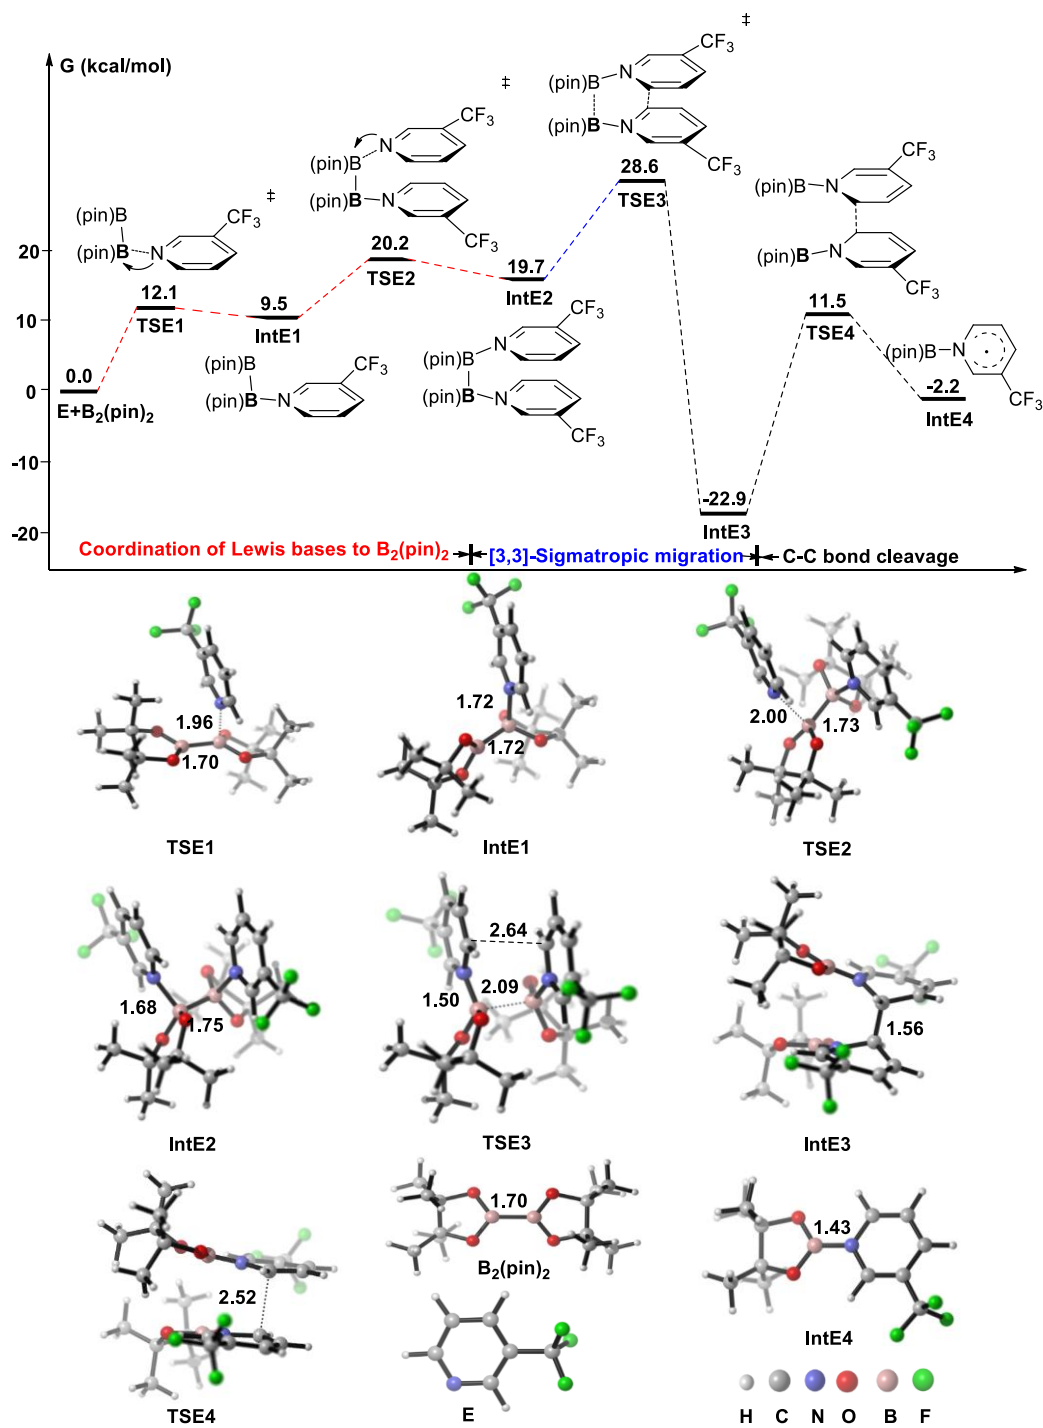

**Figure S7.** Computed Gibbs energy profile for 3-(trifluoromethyl)pyridine (**E**) catalyzed formation of the pyridine-boryl radical using  $B_2(\text{pin})_2$  in the benzene. Interatomic distances are in Å.

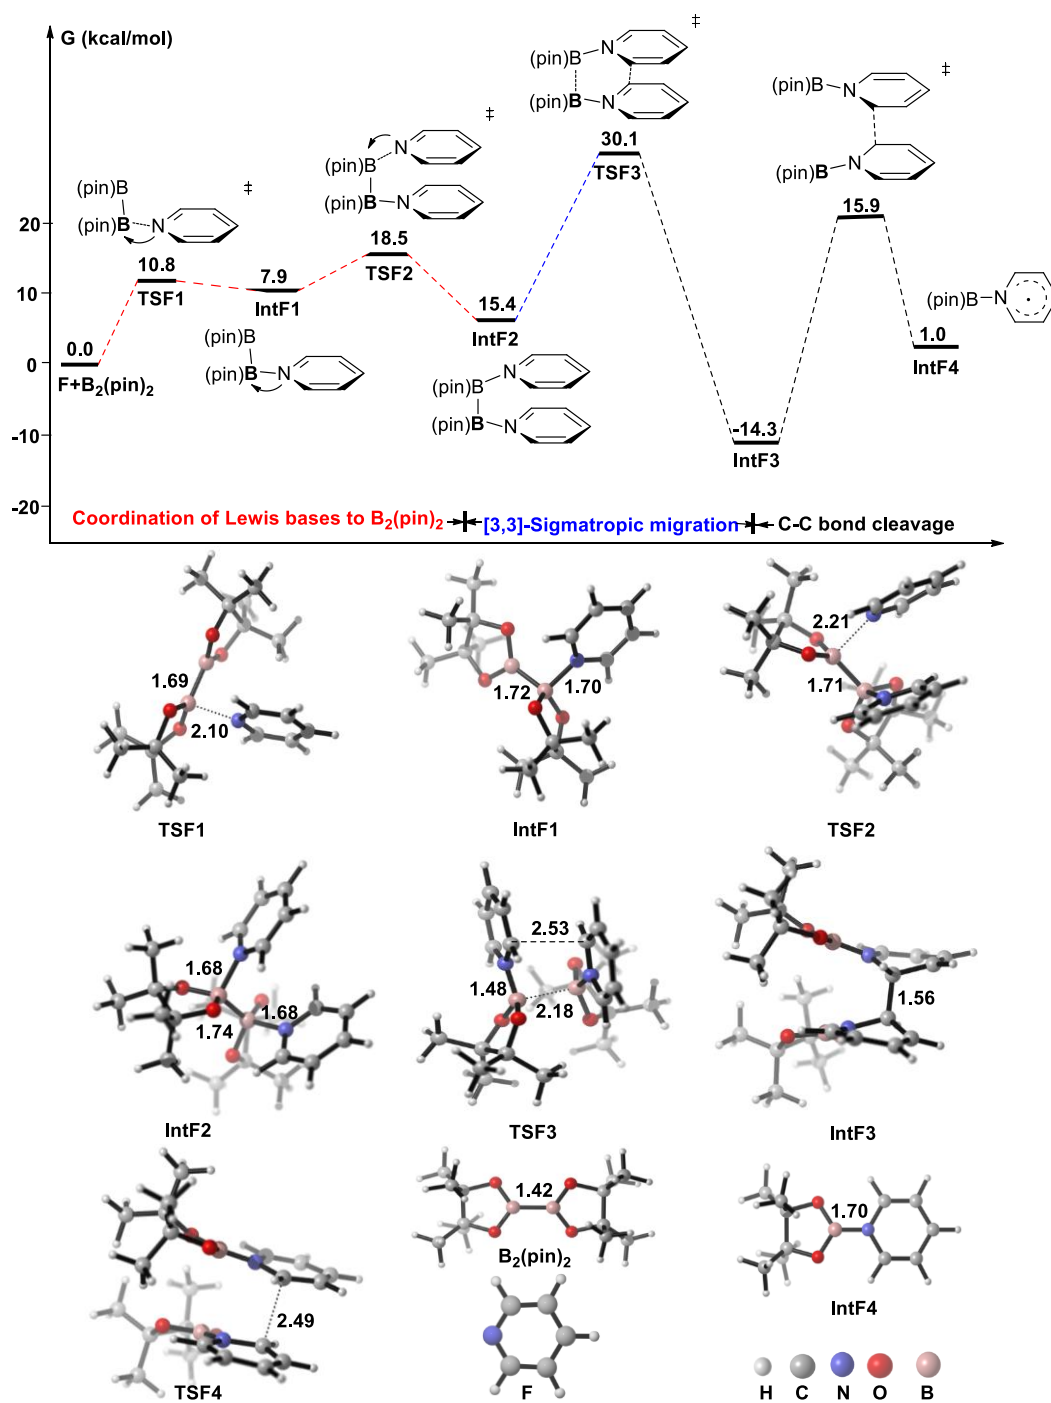

**Figure S8.** Computed Gibbs energy profile for pyridine (**F**) catalyzed formation of the pyridine-boryl radical using B<sub>2</sub>(pin)<sub>2</sub> in the benzene. Interatomic distances are in Å.

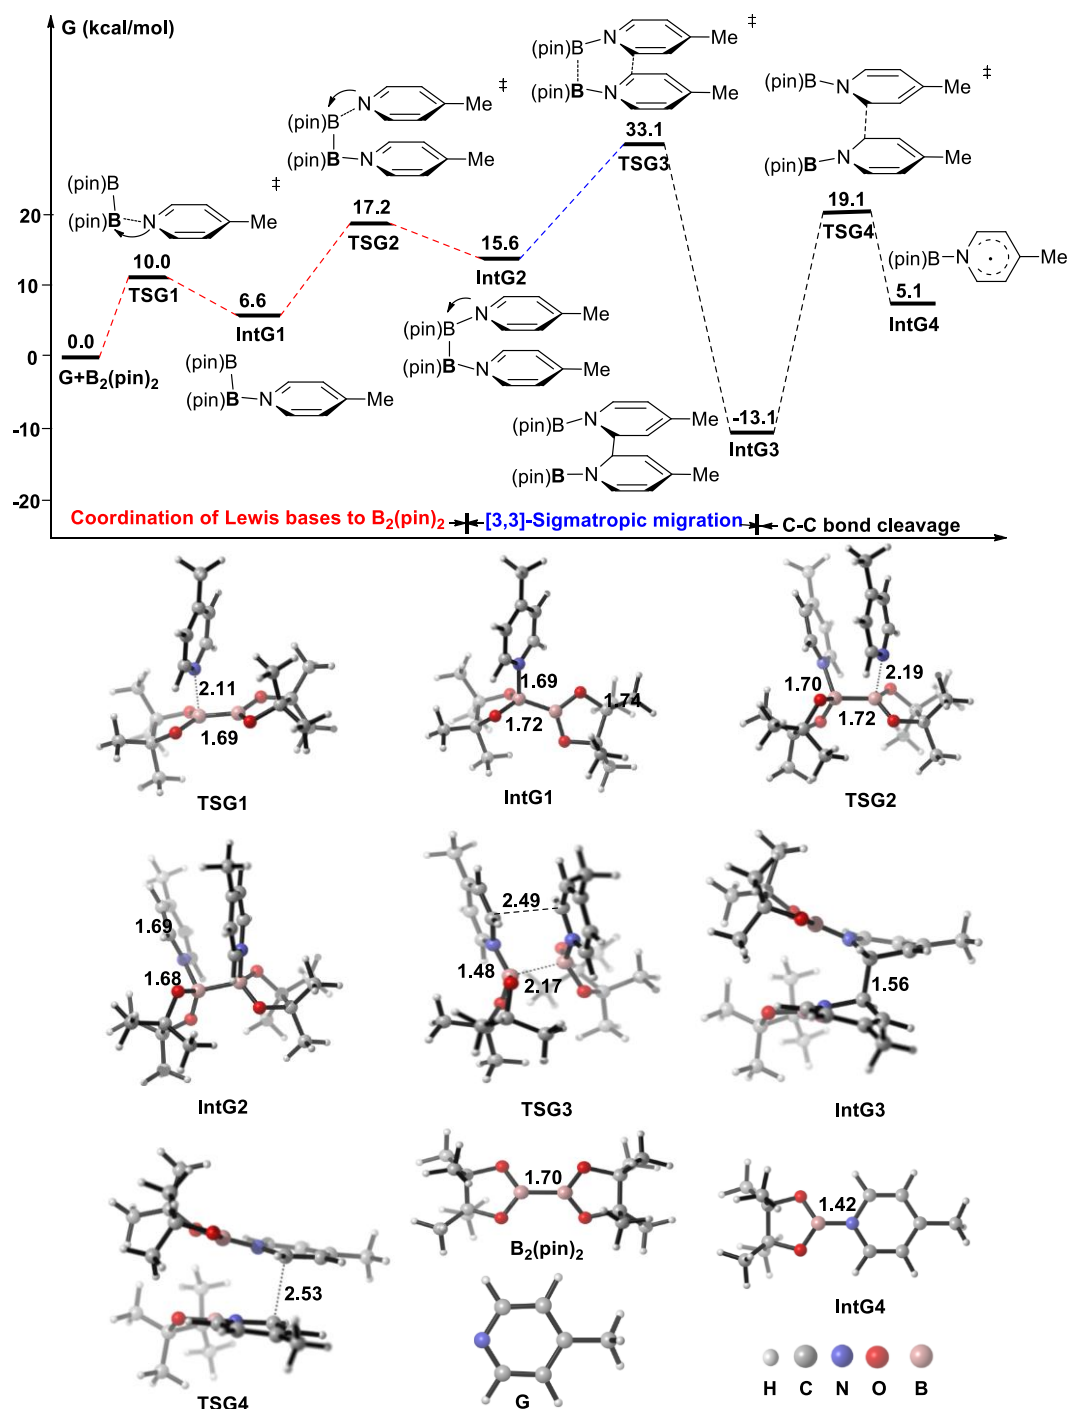

**Figure S9.** Computed Gibbs energy profile for 4-methylpyridine (**G**) catalyzed formation of the pyridine-boryl radical using  $B_2(\text{pin})_2$  in the benzene. Interatomic distances are in Å.

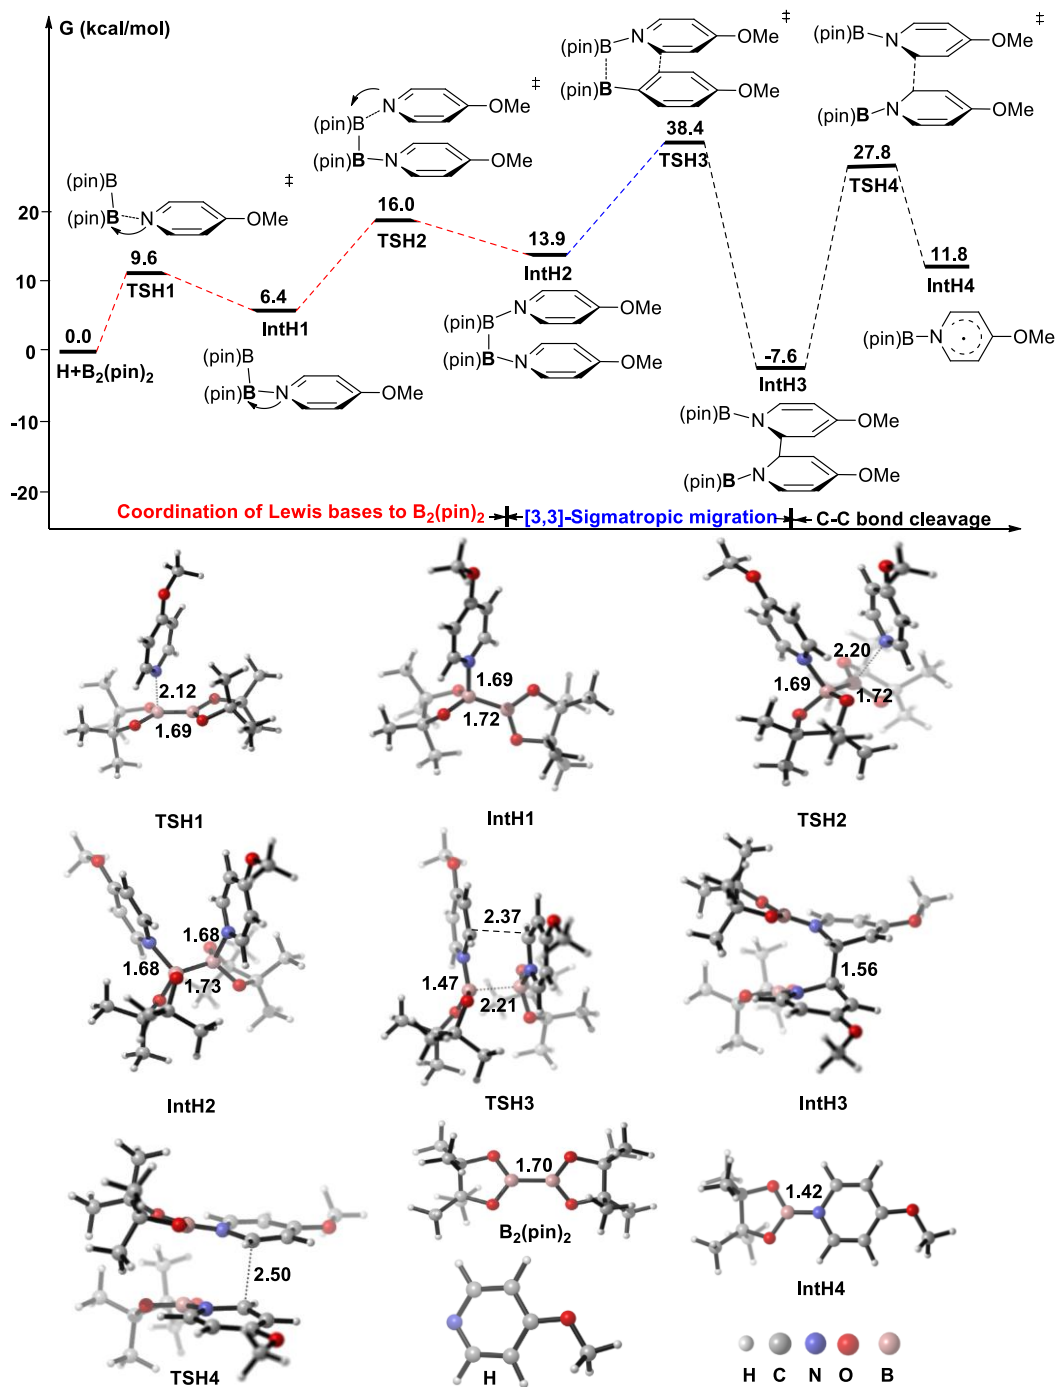

**Figure S10.** Computed Gibbs energy profile for 4-methoxypyridine (**H**) catalyzed formation of the pyridine-boryl radical using  $B_2(\text{pin})_2$  in the benzene. Interatomic distances are in Å.



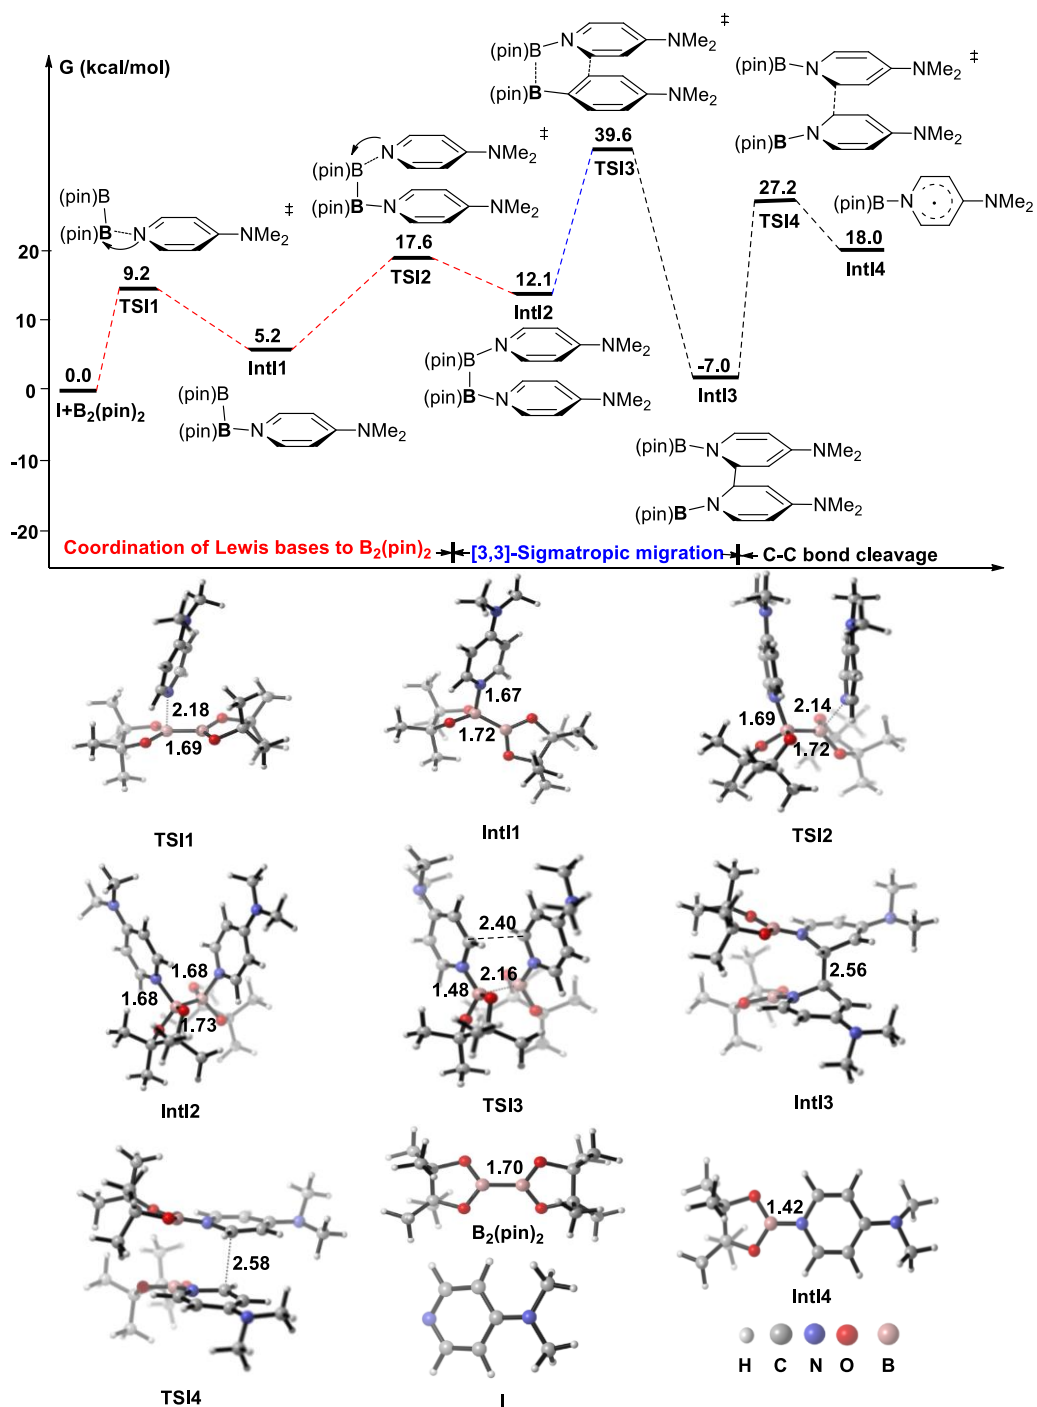

**Figure S11.** Computed Gibbs energy profile for 4-dimethylaminopyridine (**I**) catalyzed formation of the pyridine-boryl radical using  $B_2(\text{pin})_2$  in the benzene. Interatomic distances are in Å.

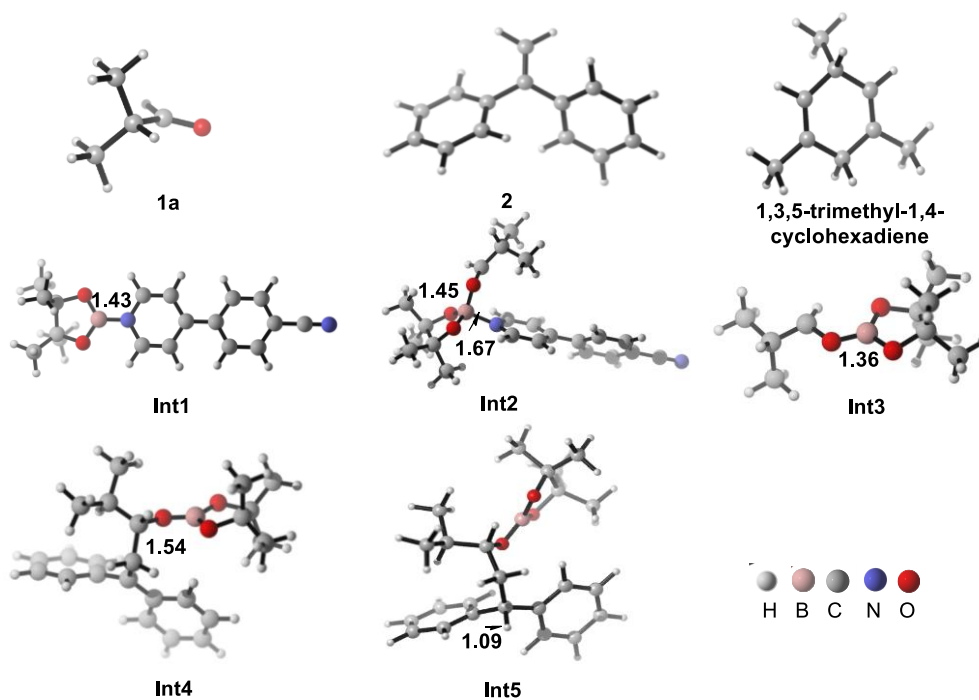

**Figure S12.** Optimized structures of all minimum species in the reductive coupling reaction between isobutyraldehyde (**1a**) and 1,1-diphenylethylene (**2**) promoted by 4-(4-pyridinyl)benzonitrile-boryl radical (**Int1**). Interatomic distances are in Å.

### 1.3 The results of single electron transfer (SET) process

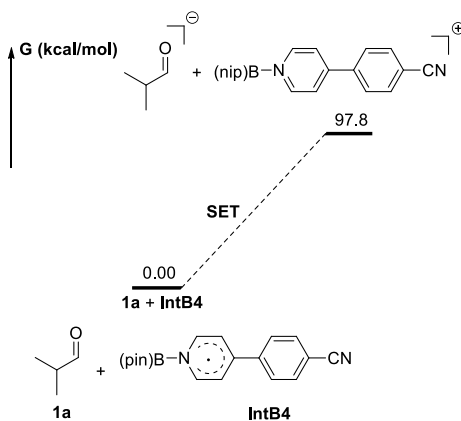

**Figure S13.** SET process between isobutyraldehyde (**1a**) and Int4

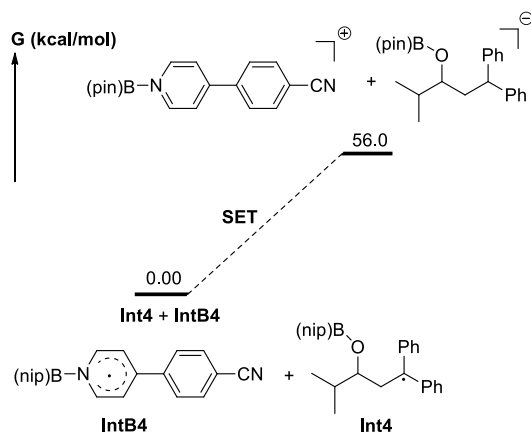

**Figure S14.** SET process between IntB4 and Int4

Our calculations show that the direct electron transfer process **IntB4** with **Int4** and isobutyraldehyde (**1a**) is not thermodynamically favorable, as shown in Figure S13 and Figure S14.

## 2. Experimental Studies on Substrate Scope

### 2.1 General information

All reactions were carried out under argon atmosphere. Dry  $\text{CH}_3\text{CN}$ ,  $\text{CH}_2\text{Cl}_2$ , methyl tert-butyl ether (MTBE) and THF were purchased from Acros and used as received. All NMR spectra were recorded on a Bruker AVANCE III-400 spectrometer at room temperature with  $\text{CDCl}_3$  as the solvent and TMS as the internal standard. Chemical shifts ( $\delta$ ) were reported in ppm with respect to the residue solvent peak. Coupling constant ( $J$ ) were reported in Hertz (Hz), abbreviations for signal couplings are indicated as follows: s, singlet; d, doublet; t, triplet; m, multiplet; br, broad. Infrared spectra were recorded on a ThermoFisher Nicolet iS5 FTIR using neat thin film technique. The electron paramagnetic resonance (EPR) spectra were obtained using a Bruker EMX-10/2 EPR spectrometer at 298.15 K. High-resolution mass spectra (HRMS) were recorded on Thermo Quest Finnigan LCQDECA system equipped with electrospray ionization (ESI), or Atmospheric Pressure Chemical Ionization (APCI). All other commercially available reagents were used without further purification.

## 2.2 Synthesis of aldehydes

Aldehydes **1u** and **1v**<sup>[8]</sup>, substituted 1,1-diaryllalkenes **4a-4n**<sup>[9]</sup>, **4o**<sup>[10]</sup>, **4p**<sup>[11]</sup> and 4-(4-pyridinyl)benzointrile (**B**)<sup>[12]</sup> were synthesized according to the reported procedure.

### Substrate synthesis **1x**

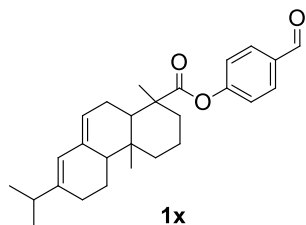

A sealed reaction bottle charged with a magnetic stir bar, abiestic acid (2.0 mmol, 1.0 equiv) DCC (dicyclohexylcarbodiimide) (3.00 mmol, 2.00 equiv), DMAP (4-dimethylaminepyridine) (0.30 mmol, 0.15 equiv) and 4-hydroxybenzaldehyde (2.00 mmol, 1.00 equiv). in CH<sub>2</sub>Cl<sub>2</sub> (15 mL). The reaction mixture was stirred at room temperature for 24 h. Then it was filtered, the filtrate was concentrated in *vacuo* and the residue was purified by chromatography on silica gel,<sup>[8]</sup> eluting with PE/EA = 10:1 (v/v) to afford the product **1x** in 60% yield). <sup>1</sup>H NMR (400 MHz, CDCl<sub>3</sub>) δ: 9.98 (s, 1H), 7.94 – 7.89 (m, 2H), 7.22 – 7.17 (m, 2H), 5.80 (s, 1H), 5.43 – 5.39 (m, 1H), 2.29 – 2.18 (m, 3H), 2.13 – 2.06 (m, 1H), 2.03 – 1.93 (m, 4H), 1.86 – 1.80 (m, 2H), 1.71 – 1.62 (m, 1H), 1.39 (s, 3H), 1.34 – 1.18 (m, 4H), 1.03 – 0.99 (m, 6H), 0.88 (s, 3H). <sup>13</sup>C NMR (100 MHz, CDCl<sub>3</sub>) δ 191.0, 176.6, 156.1, 145.7, 135.8, 133.9, 131.2, 122.5, 122.3, 120.2, 51.0, 47.2, 45.2, 38.3, 37.1, 35.0, 34.7, 27.5, 25.9, 22.6, 21.5, 20.9, 18.2, 17.2, 14.1; IR (film): 2931, 2733, 2118, 1747, 1698, 1599, 1508, 1208, 1046, 859, 738; HRMS (ESI-TOF) exact mass calculated for C<sub>27</sub>H<sub>34</sub>O<sub>3</sub> [M+Na]<sup>+</sup> 429.2400, found 429.2396.

### Substrate synthesis **1y**

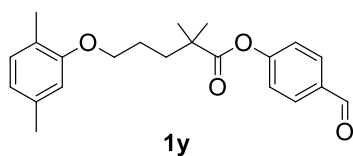

A sealed reaction bottle charged with a magnetic stir bar, abiestic acid (2.0 mmol, 1.0 equiv) DCC (dicyclohexylcarbodiimide) (3.00 mmol, 2.00 equiv), DMAP

(4-dimethylaminepyridine) (0.30 mmol, 0.15 equiv) and 4-hydroxybenzaldehyde (2.00 mmol, 1.00 equiv). in CH<sub>2</sub>Cl<sub>2</sub> (15 mL). The reaction mixture was stirred at room temperature for 24 h. Then it was filtered, the filtrate was concentrated in *vacuo* and the residue was purified by chromatography on silica gel,<sup>[8]</sup> eluting with PE/EA = 10:1 (v/v) to afford the product at the colorless oil (40% yield). <sup>1</sup>H NMR (400 MHz, CDCl<sub>3</sub>) δ 9.96 (s, 1H), 7.89 – 7.86 (m, 2H), 7.21 – 7.17 (m, 2H), 6.99 (d, *J* = 7.4 Hz, 1H), 6.67 – 6.61 (m, 2H), 4.05 – 3.91 (m, 2H), 2.29 (s, 3H), 2.17 (s, 3H), 1.98 – 1.78 (m, 4H), 1.38 (s, 6H); <sup>13</sup>C NMR (100 MHz, CDCl<sub>3</sub>) δ 190.9, 175.7, 156.8, 156.8, 136.5, 133.9, 131.2, 130.4, 123.6, 122.4, 120.8, 111.9, 67.6, 42.6, 37.1, 37.0, 25.3, 25.1, 21.4, 15.8; IR (film): 2925, 2733, 1755, 1698, 1599, 1505, 1264, 1104, 803; HRMS (ESI-TOF) exact mass calculated for C<sub>22</sub>H<sub>26</sub>O<sub>4</sub> [M+H]<sup>+</sup> 355.1904, found 355.1901.

### 2.3 Optimization studies of the reaction conditions

**Table S1** Optimization of the reaction conditions<sup>a</sup>

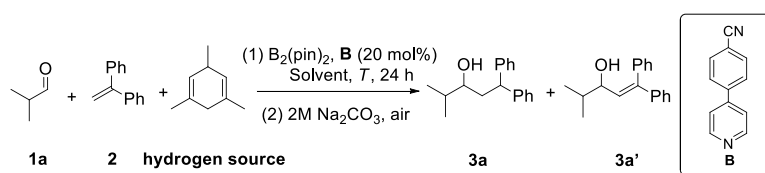

| entry | T(°C) | Solvent                         | Ratio (3a/3a') <sup>b</sup> |
|-------|-------|---------------------------------|-----------------------------|
| 1     | 120   | CH <sub>2</sub> Cl <sub>2</sub> | N R                         |
| 2     | 120   | CH <sub>3</sub> CN              | N R                         |
| 3     | 120   | THF                             | 47%:3%                      |
| 4     | 120   | MTBE                            | 78%: 6%                     |
| 5     | 100   | MTBE                            | 55%:8%                      |
| 6     | 120   | MTBE                            | 30%:2% <sup>c</sup>         |

<sup>a</sup>Reaction conditions: isobutyraldehyde (**1a**, 0.2 mmol), B<sub>2</sub>(pin)<sub>2</sub> (0.2 mmol), 4-(4-pyridinyl)benzonitrile (**B**, 0.04 mmol), 1,1-diphenylethylene (**2**, 0.4 mmol), 1,3,5-trimethyl-1,4-cyclohexadiene (0.2 mmol), solvent (1.0 mL). <sup>b</sup>Yields were determined by <sup>1</sup>H-NMR analysis of the crude mixture using CH<sub>2</sub>Br<sub>2</sub> as the internal standard. <sup>c</sup>B<sub>2</sub>pin<sub>2</sub> (0.5 equiv).

Isobutyraldehyde (**1a**) and 1, 1-diphenylethylene (**2**) were chosen as the model substrates for optimization of the reaction conditions. As shown Table S1, methyl tert-butyl ether (MTBE) was found to be the solvent for this reaction when 4-(4-pyridinyl)benzonitrile (**B**) was adopted as the catalyst (entry 1-4). A reduced

yield was observed at 100 °C (entry 5). With 0.5 equiv B<sub>2</sub>(pin)<sub>2</sub>, the yield of 3a decreased to 30% (entry 6).

**Table S2** The effect of adding the hydrogen source on the product distribution

| substrates of the 1,1-diarylethylenes | combined isolated yield (5/5') |                         |
|---------------------------------------|--------------------------------|-------------------------|
|                                       | with hydrogen                  | without hydrogen source |
| <br>4i                                | 68% (1: 0.12)                  | 72% (1: 0.58)           |
| <br>4j                                | 44% (1: 0.08)                  | 55% (1: 0.43)           |

As shown in Table S2, the addition of the hydrogen source is important for improving the yield of the main product (**5**).

In addition, the catalytic reactivity of different pyridines toward the reductive coupling reaction between isobutyraldehyde (**1a**) and 1, 1-diphenylethylene (**2**) was also tested. As shown in Table S2, 4-(4-pyridinyl)benzonitrile (**B**) was found to be the most effective catalyst. When other pyridines were adopted (For example, **E-I**), no desired product was detected, possibly due to the high B-B bond activation barriers of these pyridines (See Figure S1).

With 4-cyanopyridine as the catalyst, the pyridine and aldehydes adduct (**3a''**) was detected and isolated in 7% yield.<sup>[13]</sup>

|                       | 3a  | 3a'' |
|-----------------------|-----|------|
| <b>NMR yield</b>      | 28% | 12%  |
| <b>isolated yield</b> | 25% | 7%   |

**Table S3** Optimization of the pyridines<sup>a</sup>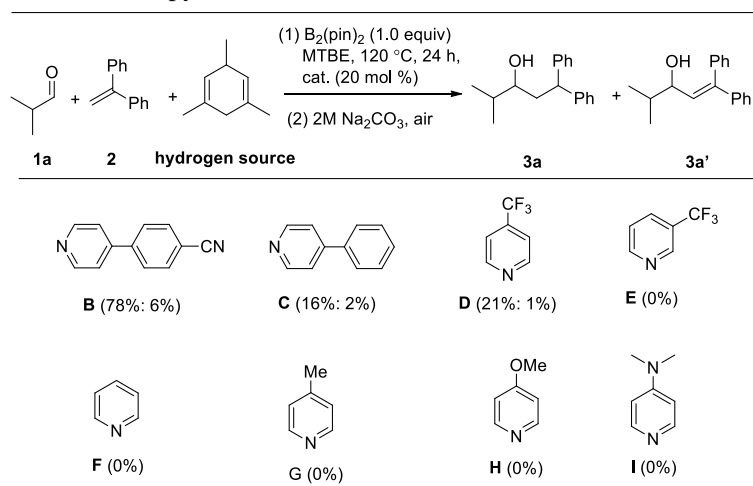

<sup>a</sup>Reaction conditions: isobutyraldehyde (**1a**, 0.2 mmol),  $B_2(\text{pin})_2$  (0.2 mmol), catalyst (0.04 mmol), 1,1-diphenylethylene (**2**, 0.4 mmol), 1,3,5-trimethyl-1,4-cyclohexadiene (0.2 mmol), MTBE (1.0 mL). Yields were determined by <sup>1</sup>H-NMR analysis of the crude mixture using  $\text{CH}_2\text{Br}_2$  as the internal standard.

## 2.4 General procedures for the organocatalytic reductive coupling between aldehydes (or ketones) and 1,1-diaryllkenes

A sealed reaction tube charged with a magnetic stir bar, aldehydes (or ketones) (0.2 mmol),  $B_2(\text{pin})_2$  (0.20 mmol, 1.0 equiv), 1,3,5-trimethyl-1,4-cyclohexadiene (0.2 mmol, 1.0 equiv), 4-(4-pyridinyl)benzonitrile (0.04 mmol, 20 mol%), MTBE (1 mL) and the corresponding coupling partner 1,1-diaryllkenes (0.4 mmol, 2.0 equiv) was placed in a heated oil bath (120 °C). After 24 hours, the reaction mixture was cooled and quenched with 2 M  $\text{Na}_2\text{CO}_3$  aqueous solution (3 mL). Then, the reaction tube was stirred under air for another 15 minutes. The reaction mixture was extracted with EtOAc (3×10 mL). The combined organic layer was dried over  $\text{Na}_2\text{SO}_4$  and then concentrated in vacuo to afford the crude product. This crude material was purified by preparative TLC on silica gel to afford the desired product.

## 3. Experimental Studies on the Reaction Mechanism

### 3.1 Electron Paramagnetic Resonance (EPR) Experiments

The existence of the 4-(4-pyridinyl)benzonitrile-boryl radical from the reaction of 4-(4-pyridinyl)benzonitrile and  $B_2(\text{pin})_2$  can be confirmed by its EPR spectrum.

The EPR spectrum (for the Microwave frequency=9.973 GHz,  $g=2.000$ ) of the pyridine-boryl radical (**Int1**) were obtained (as shown in Figure S15) through the addition of 4-(4-pyridinyl)benzotrile (1 equiv) to a 0.2 M solution of  $B_2(\text{pin})_2$  in MTBE (1 mL) (line 1). This result give supportive evidence for the formation of 4-(4-pyridinyl)benzotrile-boryl radical, which was consistent with our DFT calculations.

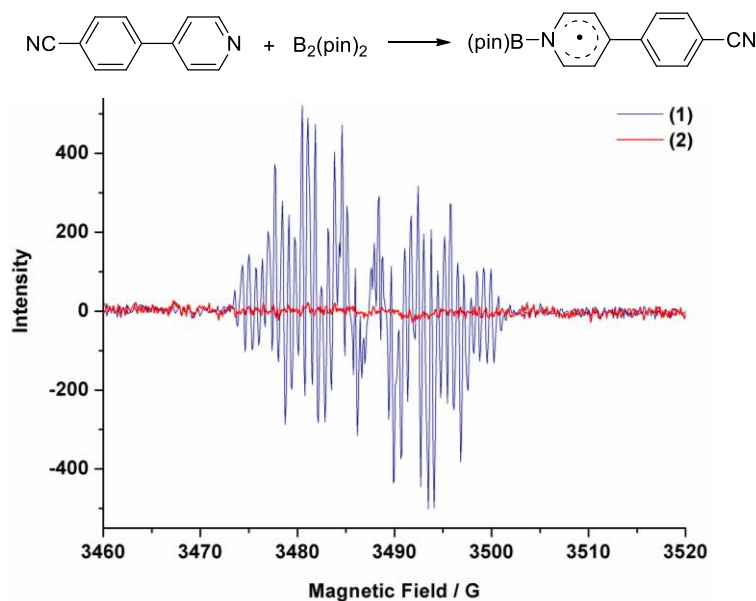

**Figure S15.** X band and EPR spectrum obtained in MTBE at 298.15 K. (1) Spectrum of 1:1 mixture of 4-(4-pyridinyl)benzotrile and  $B_2(\text{pin})_2$ . (2) Spectrum of 0.1 M solution of 4-(4-pyridinyl)benzotrile.

### 3.2 The involvement of the ketyl radical

The involvement of the ketyl radical can be confirmed by a competition experiment. As shown below, when the hydrogen source 1,3,5-trimethyl-1,4-cyclohexadiene was replaced by 3-methylbenzenethiol, the ketyl radical quickly abstracted a hydrogen atom from 3-methylbenzenethiol to yield the reductive product, 3-phenyl-1-propanol, so that its addition to 1,1-diphenylethylene (to form the reductive coupling product) was inhibited. This result clearly indicated the involvement of the ketyl radical.



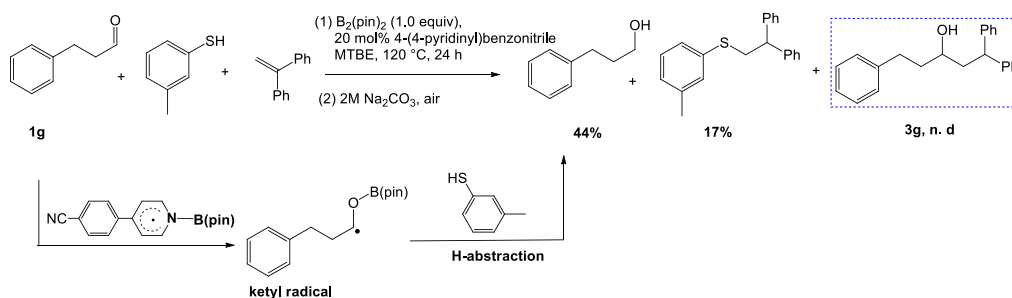

**Experimental procedure:** A sealed reaction tube charged with a magnetic stir bar, **1g** (0.20 mmol),  $B_2(\text{pin})_2$  (0.20 mmol, 1.0 equiv), 3-methylbenzenethiol (0.3 mmol, 1.5 equiv), 4-(4-pyridinyl)benzointrile (catalyst, 0.04 mmol, 20 mol %), MTBE (1 mL) and 1,1-diphenylethylene (0.4 mmol, 2.0 equiv) were placed in a heated oil bath (120 °C). After 24 hours, the reaction was cooled and quenched with 2M  $Na_2CO_3$  aqueous solution (3 mL). The reaction tube was stirred under air for another 15 minutes. The reaction mixture was extracted with EtOAc ( $3 \times 10$  mL). The combined organic layer was dried over  $Na_2SO_4$  and then concentrated in vacuo to afford the crude product. This crude material was purified by preparative TLC on silica gel (PE/EA=20:1) to afford the 3-phenyl-1-propanol in 44% yield.

### 3.3 The generation of the radical species **Int4** (or its analogues)

The radical species **Int4** (or its analogues), which can be generated via the addition of the ketyl radical to the  $\beta$ -position of arylethylene, can be confirmed by an intermolecular trapping experiment. When 2-vinylpyridine and trimethylacetaldehyde was subjected to the standard reaction condition, species **6** and **6'** could be detected by HRMS analysis for the crude reaction mixture. This result suggests that in this reaction, the radical species **Int4-like** was further trapped by another 2-vinylpyridine molecule.

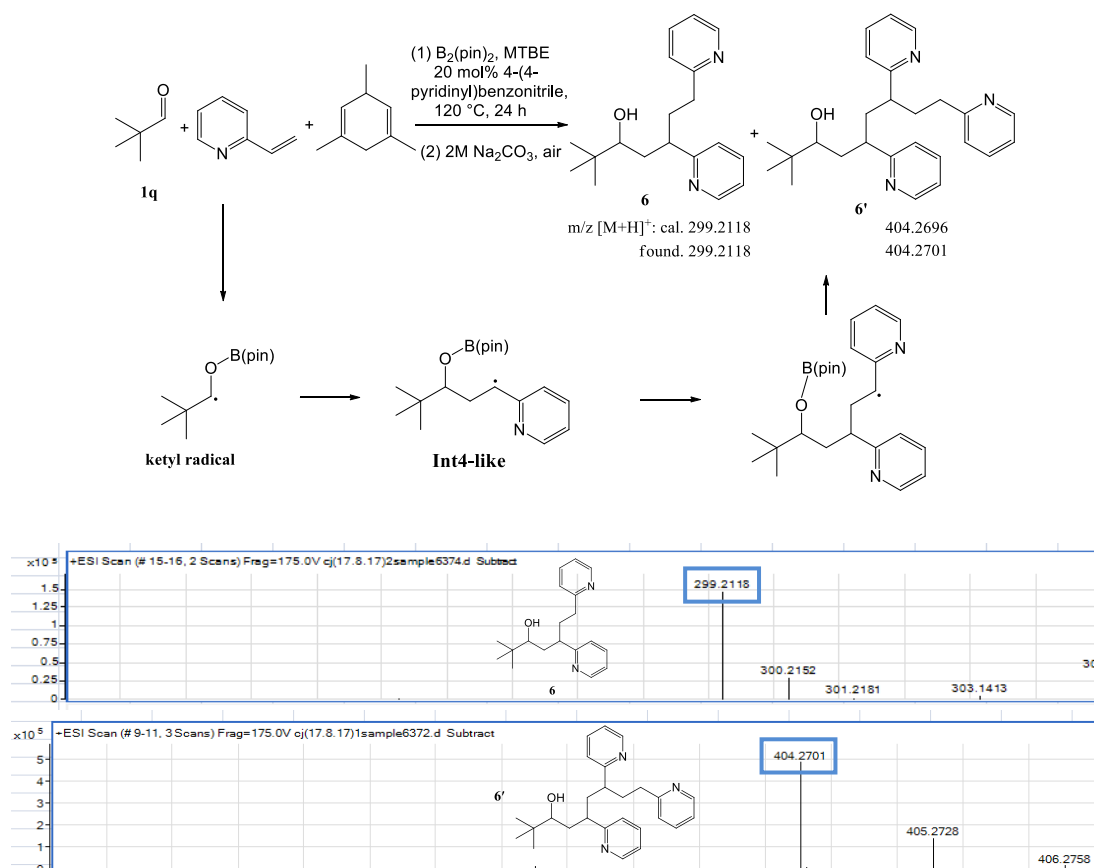

**Figure S16.** Mass spectrum of the crude reaction mixture of **1q**, 2-vinylpyridine, 1,3,5-trimethyl-1,4-cyclohexadiene, 4-(4-pyridinyl)benzotrile and  $B_2(\text{pin})_2$ .

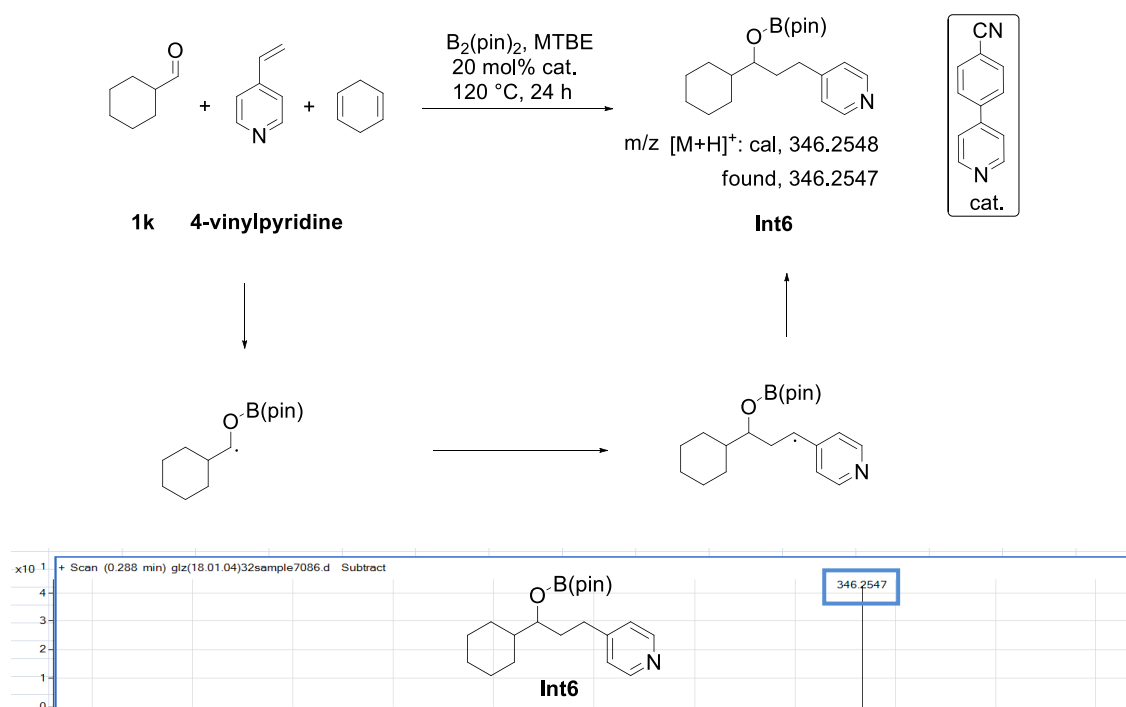

**Figure S17.** Mass spectrum of the crude reaction mixture of **1k**, 4-vinylpyridine, 1,4-cyclohexadiene, 4-(4-pyridinyl)benzotrile and  $B_2(\text{pin})_2$ .

### 3.3 $^{11}\text{B}$ spectra of $\text{B}_2(\text{pin})_2$ and crude reaction mixture

We further conducted  $^{11}\text{B}$  NMR analysis to detect the formation of the proposed O-boron intermediate (**Int7**). As shown below, the appearance of a set of signals at 21.2~22.2 ppm in the crude reaction mixture before work-up by  $\text{Na}_2\text{CO}_3$ , characteristic of a neutral boron center bound to three oxygen atoms, provided evidence for the formation of boron intermediate (**Int7**). The  $^{11}\text{B}$  NMR shift at ~21 ppm is consistent with the previous report.<sup>[14]</sup> This result suggests that this reaction proceeded through the transfer of the boryl radical from the pyridine-boryl radical to the oxygen atom of aldehyde.

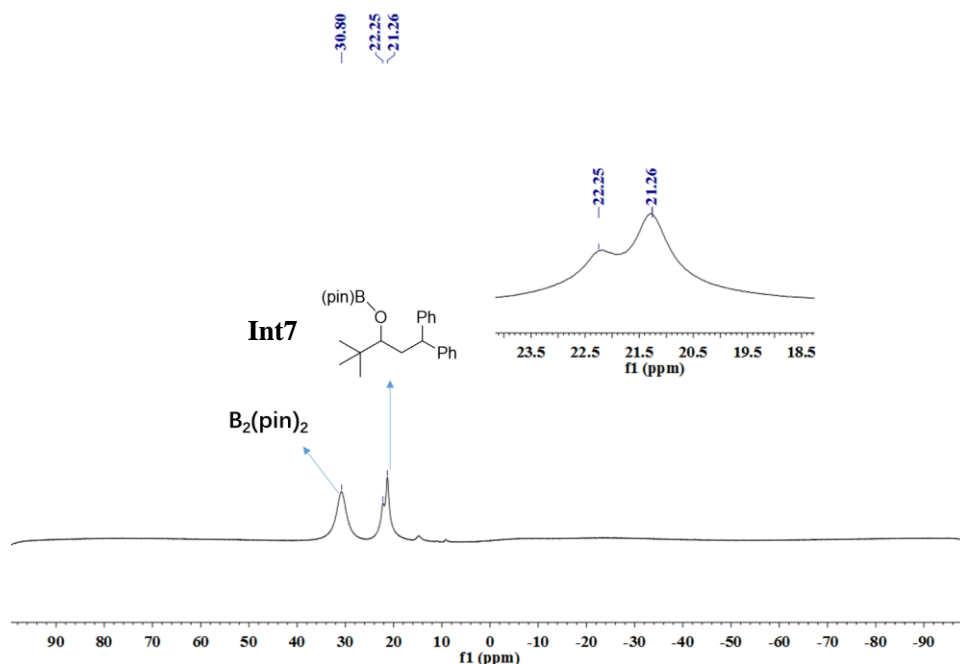

**Figure S18.**  $^{11}\text{B}$  NMR spectrum in THF-d8 of the crude reaction mixture of **1q**, 1,1-diphenylethylene, 1,3,5-trimethyl-1,4-cyclohexadiene, 4-(4-pyridinyl)benzotrile and  $\text{B}_2(\text{pin})_2$ .

**Experimental procedure:** A sealed reaction tube charged with a magnetic stir bar, **1q** (0.20 mmol),  $\text{B}_2(\text{pin})_2$  (0.20 mmol, 1.0 equiv), 1,3,5-trimethyl-1,4-cyclohexadiene (0.2 mmol, 1.0 equiv), 4-(4-pyridinyl)benzotrile (catalyst, 0.04 mmol, 20 mol %), THF-d8 (1 mL) and 1,1-diphenylethylene (0.4 mmol, 2.0 equiv) were placed in a heated oil bath (120 °C). After 24 hours, the reaction mixture was used to detection of  $^{11}\text{B}$  NMR.

### 3.4 radical clock experiment

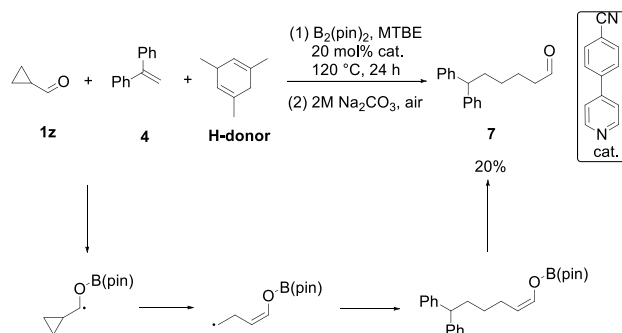

**Experimental procedure:** A sealed reaction tube charged with a magnetic stir bar, **1z** (0.20 mmol),  $B_2(\text{pin})_2$  (0.20 mmol, 1.0 equiv), 1,3,5-trimethyl-1,4-cyclohexadiene (0.2 mmol, 1.0 equiv), 4-(4-pyridinyl)benzotrile (catalyst, 0.04 mmol, 20 mol %), MTBE (1 mL) and 1,1-diphenylethylene (0.4 mmol, 2.0 equiv) were placed in a heated oil bath (120 °C). After 24 hours, the reaction was cooled and quenched with 2M  $\text{Na}_2\text{CO}_3$  aqueous solution (3 mL). The reaction tube was stirred under air for another 15 minutes. The reaction mixture was extracted with EtOAc (3×10 mL). The combined organic layer was dried over  $\text{Na}_2\text{SO}_4$  and then concentrated in vacuo to afford the crude product. This crude material was purified by preparative TLC on silica gel (PE/EA=20:1) to afford the product **7** in 20% yield.

**7:** Colorless oil;  $^1\text{H}$  NMR (400 MHz,  $\text{CDCl}_3$ )  $\delta$  9.27 (s, 1H), 7.34 – 7.21 (m, 8H), 7.20 – 7.17 (m, 2H), 3.64 – 3.59 (m, 1H), 2.55 – 2.48 (m, 1H), 2.39 – 2.34 (m, 1H), 2.12 – 2.03 (m, 3H), 1.96 – 1.90 (m, 1H), 1.68 – 1.61 (m, 2H);  $^{13}\text{C}$  NMR (100 MHz,  $\text{CDCl}_3$ )  $\delta$  204.2, 147.5, 144.6, 128.4, 128.3, 128.2, 126.6, 126.5, 126.1, 58.6, 58.1, 38.5, 25.0, 22.1; IR (film): 3056, 2957, 2957, 2873, 2735, 1717, 1492, 1492, 700; HRMS (ESI-TOF) exact mass calculated for  $\text{C}_{17}\text{H}_{19}\text{O}$   $[\text{M}+\text{H}]^+$  253.1587, found 253.1596.

#### 4. Spectroscopic Characterization of the Coupling Products

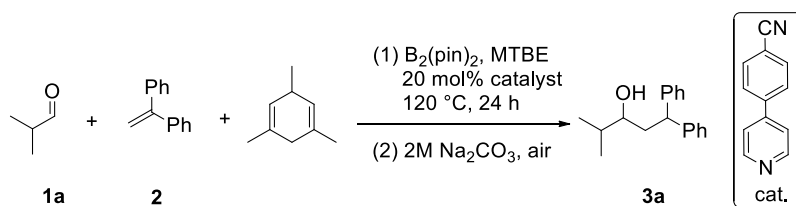

**3a**: Prepared following *general procedure* using **1a** (18.3  $\mu\text{L}$ , 0.2 mmol, 1.0 equiv), 1,1-diphenylethylene (70.6  $\mu\text{L}$ , 0.4 mmol, 2.0 equiv),  $B_2(\text{pin})_2$  (50.8 mg, 1.0 equiv), 1,3,5-trimethyl-1,4-cyclohexadiene (24.5 mg, 0.2 mmol, 1.0 equiv), 4-(4-pyridinyl)benzonitrile (7.2 mg, 20 mol%) and MTBE (1 mL) at 120 °C. After 24 h, following the described step, the reaction mixture was isolated with prepared TLC on silica (PE/EA = 20:1) to afford the product **3a** (36 mg, 70% yield). NMR spectrums of the compounds **3a** are consistent with previous reported results.<sup>[15]</sup>

**3a**: Colorless oil;  $^1\text{H}$  NMR (400 MHz,  $CDCl_3$ )  $\delta$  7.33 – 7.25 (m, 8H), 7.24 – 7.15 (m, 2H), 4.28 (dd,  $J$  = 10.8, 4.6 Hz, 1H), 3.30-3.24 (m, 1H), 2.33-2.25 (m, 1H), 2.08-2.01 (m, 1H), 1.64-1.72 (m, 2H, with -OH), 0.91 (d,  $J$  = 6.8 Hz, 6H);  $^{13}\text{C}$  NMR (100 MHz,  $CDCl_3$ )  $\delta$  145.7, 144.0, 128.6, 128.6, 128.3, 127.8, 126.4, 126.2, 74.2, 47.7, 40.0, 34.1, 18.7, 17.2; IR (film): 3398, 3084, 3026, 2957, 1727, 1599, 1450, 1385; HRMS (ESI-TOF) exact mass calculated for  $C_{18}H_{22}NaO$   $[M+Na]^+$  277.1563, found 277.1560.

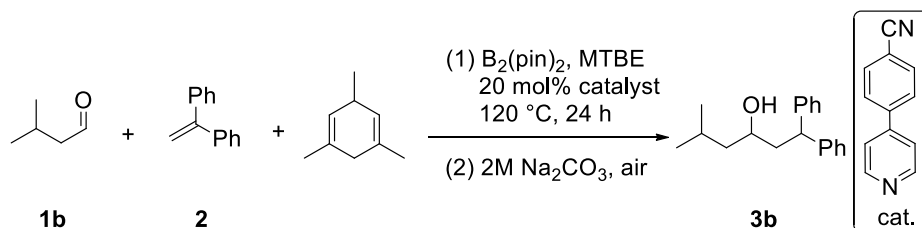

**3b**: Prepared following *general procedure* using **1b** (21.5  $\mu\text{L}$ , 0.2 mmol, 1.0 equiv), 1,1-diphenylethylene (70.6  $\mu\text{L}$ , 0.4 mmol, 2.0 equiv),  $B_2(\text{pin})_2$  (50.8 mg), 1,3,5-trimethyl-1,4-cyclohexadiene (24.5 mg, 0.2 mmol, 1.0 equiv), 4-(4-pyridinyl)benzonitrile (7.2 mg, 20 mol%) and MTBE (1 mL) at 120 °C. After 24 h, following the described step, the reaction mixture was isolated with prepared TLC on silica (PE/EA = 20:1) to afford the product **3b** (37 mg, 70% yield). NMR spectrums of the compounds **3b** are consistent with previous reported results.<sup>[15]</sup>

**3b**: Colorless oil;  $^1\text{H}$  NMR (400 MHz,  $\text{CDCl}_3$ )  $\delta$  7.33 – 7.26 (m, 8H), 7.22 – 7.16 (m, 2H), 4.25 (dd,  $J = 9.9, 5.9$  Hz, 1H), 3.53 – 3.39 (m, 1H), 2.28 – 2.21 (m, 1H), 2.13 – 2.06 (m, 1H), 1.70 – 1.77 (m, 1H), 1.45 – 1.29 (m, 3H, with -OH), 0.87 (d,  $J = 6.6$  Hz, 3H), 0.83 (d,  $J = 6.6$  Hz, 3H);  $^{13}\text{C}$  NMR (100 MHz,  $\text{CDCl}_3$ )  $\delta$  145.3, 144.2, 128.6, 128.6, 128.1, 127.1, 126.4, 126.2, 68.0, 47.7, 47.4, 43.8, 24.7, 23.4, 22.3.; IR (film): 3602, 2956, 2869, 1598, 1493, 1450, 1364, 1007; HRMS (ESI-TOF) exact mass calculated for  $\text{C}_{19}\text{H}_{24}\text{NaO}$   $[\text{M}+\text{Na}]^+$  291.1719, found 291.1713.

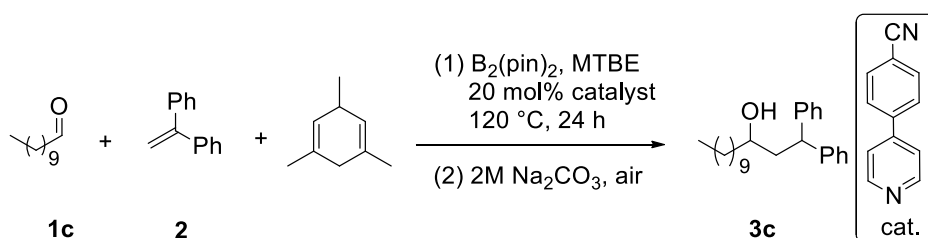

**3c**: Prepared following *general procedure* using **1c** (41.3  $\mu\text{L}$ , 0.2 mmol, 1.0 equiv), 1,1-diphenylethylene (70.6  $\mu\text{L}$ , 0.4 mmol, 2.0 equiv),  $\text{B}_2(\text{pin})_2$  (50.8 mg), 1,3,5-trimethyl-1,4-cyclohexadiene (24.5 mg, 0.2 mmol, 1.0 equiv), 4-(4-pyridinyl)benzonitrile (7.2 mg, 20 mol%) and MTBE (1 mL) at 120  $^\circ\text{C}$ . After 24 h, following the described step, the reaction mixture was isolated with prepared TLC on silica (PE/EA = 20:1) to afford the product **3c** (50 mg, 71% yield).

**3c**: Colorless oil;  $^1\text{H}$  NMR (400 MHz,  $\text{CDCl}_3$ )  $\delta$  7.33 – 7.27 (m, 8H), 7.25 – 7.15 (m, 2H), 4.27 (dd,  $J = 10.2, 5.7$  Hz, 1H), 3.52 – 3.44 (m, 1H), 2.31 – 2.22 (m, 1H), 2.15 – 2.06 (m, 1H), 1.5 – 1.45 (m, 2H), 1.35 – 1.21 (m, 17H, with -OH), 0.94 – 0.88 (m, 3H).  $^{13}\text{C}$  NMR (100 MHz,  $\text{CDCl}_3$ )  $\delta$  145.4, 144.2, 128.6, 128.6, 128.2, 127.8, 126.4, 126.2, 69.9, 47.6, 43.3, 38.1, 32.0, 29.8, 29.7, 29.7, 29.7, 29.4, 25.6, 22.8, 14.2; IR (film): 3355, 3026, 2925, 2853, 1599, 1494, 1451, 1377; HRMS (ESI-TOF) exact mass calculated for  $\text{C}_{25}\text{H}_{36}\text{NaO}$   $[\text{M}+\text{Na}]^+$  375.2658, found 375.2655.

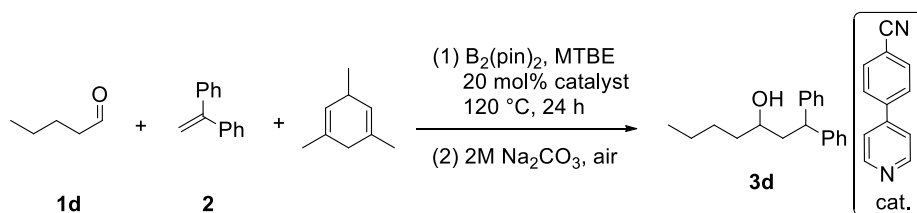

**3d**: Prepared following *general procedure* using **1d** (21.3  $\mu\text{L}$ , 0.2 mmol, 1.0 equiv), 1,1-diphenylethylene (70.6  $\mu\text{L}$ , 0.4 mmol, 2.0 equiv),  $\text{B}_2(\text{pin})_2$  (50.8 mg),

1,3,5-trimethyl-1,4-cyclohexadiene (24.5 mg, 0.2 mmol, 1.0 equiv), 4-(4-pyridinyl)benzotrile (7.2 mg, 20 mol%) and MTBE (1 mL) at 120 °C. After 24 h, following the described step, the reaction mixture was isolated with prepared TLC on silica (PE/EA = 50:1) to afford the product **3d** (38 mg, 72% yield). NMR spectrums of the compounds **3d** are consistent with previous reported results.<sup>[15]</sup>

**3d**: Colorless oil; <sup>1</sup>H NMR (400 MHz, CDCl<sub>3</sub>) δ 7.34 – 7.26 (m, 8H), 7.24 – 7.16 (m, 2H), 4.26 (dd, *J* = 9.5, 5.8 Hz, 1H), 3.52 – 3.44 (m, 1H), 2.30 – 2.22 (m, 1H), 2.15 – 2.07 (m, 1H), 1.51 – 1.26 (m, 7H, with -OH), 0.92 – 0.88 (m, 3H); <sup>13</sup>C NMR (100 MHz, CDCl<sub>3</sub>) δ 145.3, 144.2, 128.6, 128.5, 128.1, 127.7, 126.3, 126.1, 69.7, 47.6, 43.2, 37.8, 27.7, 22.7, 14.1; IR (film): 3365, 3060, 2930, 2857, 1494, 1450, 1378, 1031; HRMS (ESI-TOF) exact mass calculated for C<sub>19</sub>H<sub>28</sub>NaON [M+NH<sub>4</sub>]<sup>+</sup> 286.2165, found 286.2162.

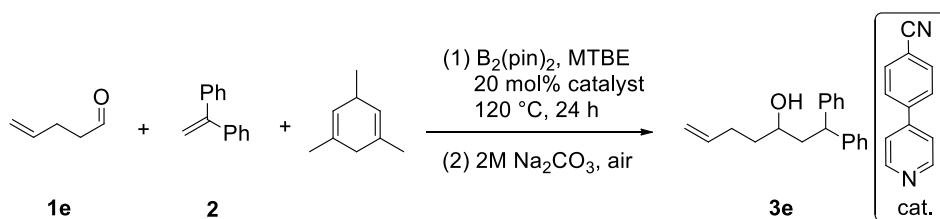

**3e**: Prepared following *general procedure* using **1e** (19.8 μL, 0.2 mmol, 1.0 equiv), 1,1-diphenylethylene (70.6 μL, 0.4 mmol, 2.0 equiv), B<sub>2</sub>(pin)<sub>2</sub> (50.8 mg), 1,3,5-trimethyl-1,4-cyclohexadiene (24.5 mg, 0.2 mmol, 1.0 equiv), 4-(4-pyridinyl)benzotrile (7.2 mg, 20 mol%) and MTBE (1 mL) at 120 °C. After 24 h, following the described step, the reaction mixture was isolated with prepared TLC on silica (PE/EA = 50:1) to afford the product **3e** (33 mg, 61% yield).

**3e**: Colorless oil; <sup>1</sup>H NMR (400 MHz, CDCl<sub>3</sub>) δ 7.31 – 7.27 (m, 8H), 7.24 – 7.16 (m, 2H), 5.87 – 5.76 (m, 1H), 5.05 – 4.94 (m, 2H), 4.30 – 4.22 (m, 1H), 3.56 – 3.48 (m, 1H), 2.29 – 2.08 (m, 3H, with -OH), 1.68 – 1.51 (m, 4H).; <sup>13</sup>C NMR (100 MHz, CDCl<sub>3</sub>) δ 145.3, 144.1, 138.5, 128.6, 128.6, 128.2, 127.8, 126.4, 126.3, 114.9, 69.5, 47.6, 43.2, 37.1, 30.0; IR (film): 3564, 3373, 3061, 3026, 2934, 1639, 1494, 911; HRMS (ESI-TOF) exact mass calculated for C<sub>19</sub>H<sub>26</sub>ON [M+NH<sub>4</sub>]<sup>+</sup> 284.2009, found 284.1999.

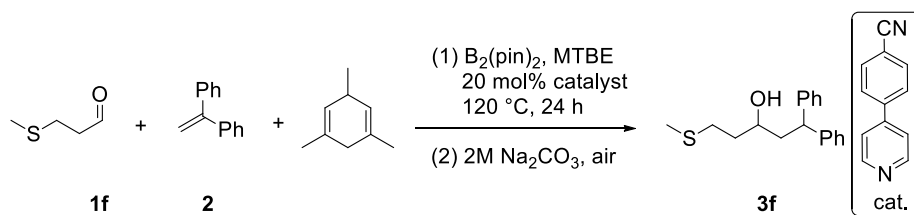

**3f:** Prepared following *general procedure* using **1f** (20.4  $\mu\text{L}$ , 0.2 mmol, 1.0 equiv), 1,1-diphenylethylene (70.6  $\mu\text{L}$ , 0.4 mmol, 2.0 equiv),  $\text{B}_2(\text{pin})_2$  (50.8 mg), 1,3,5-trimethyl-1,4-cyclohexadiene (24.5 mg, 0.2 mmol, 1.0 equiv), 4-(4-pyridinyl)benzotrile (7.2 mg, 20 mol%) and MTBE (1 mL) at 120  $^\circ\text{C}$ . After 24 h, following the described step, the reaction mixture was isolated with prepared TLC on silica (PE/EA = 50:1) to afford the product **3f** (38 mg, 67% yield).

**3f:** Colorless oil;  $^1\text{H}$  NMR (400 MHz,  $\text{CDCl}_3$ )  $\delta$  7.34 – 7.24 (m, 8H), 7.23 – 7.15 (m, 2H), 4.7 – 4.21 (dd,  $J = 9.7, 6.2$  Hz, 1H), 3.66 – 3.58 (m, 1H), 2.61 – 2.54 (m, 2H), 2.27 – 2.14 (m, 2H), 2.07 (brs, 4H, with -OH), 1.81 – 1.71 (m, 2H).  $^{13}\text{C}$  NMR (100 MHz,  $\text{CDCl}_3$ )  $\delta$  145.1, 144.0, 128.7, 128.6, 128.1, 127.8, 126.4, 126.3, 69.3, 47.5, 43.3, 36.5, 30.8, 15.5; IR (film): 3419, 3025, 2916, 1493, 1450, 1060, 1000, 901; HRMS (ESI-TOF) exact mass calculated for  $\text{C}_{18}\text{H}_{22}\text{OSNa}$   $[\text{M}+\text{Na}]^+$  309.1284, found 309.1280.

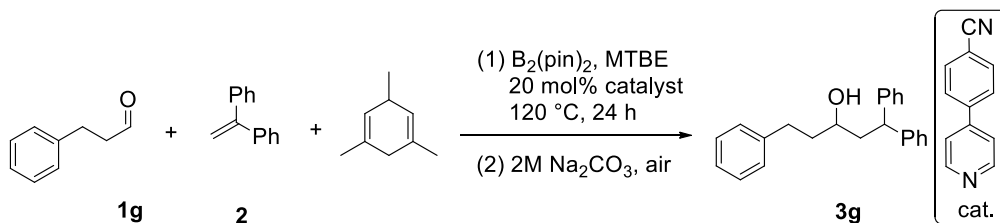

**3g:** Prepared following *general procedure* using **1g** (26.33  $\mu\text{L}$ , 0.2 mmol, 1.0 equiv), 1,1-diphenylethylene (70.6  $\mu\text{L}$ , 0.2 mmol, 2.0 equiv),  $\text{B}_2(\text{pin})_2$  (50.8 mg), 1,3,5-trimethyl-1,4-cyclohexadiene (24.5 mg, 0.2 mmol, 1.0 equiv), 4-(4-pyridinyl)benzotrile (7.2 mg, 20 mol%) and MTBE (1 mL) at 120  $^\circ\text{C}$ . After 24 h, following the described step, the reaction mixture was isolated with prepared TLC on silica (PE/EA = 50:1) to afford the product **3g** (35 mg, 55% yield). NMR spectrums of the compounds **3g** are consistent with previous reported results.<sup>[15]</sup>

**3g:** Colorless oil;  $^1\text{H}$  NMR (400 MHz,  $\text{CDCl}_3$ )  $\delta$  7.33 – 7.23 (m, 10H), 7.23 – 7.11 (m, 5H), 4.24 (dd,  $J = 9.8, 6.0$  Hz, 1H), 3.59 – 3.52 (m, 1H), 2.80 – 2.70 (m, 1H),



2.66 – 2.57 (m, 1H), 2.33 – 2.25 (m, 1H), 2.89 – 2.74(m, 1H), 1.90 – 1.70 (m, 3H, with -OH). <sup>13</sup>C NMR (100 MHz, CDCl<sub>3</sub>) δ 145.2, 144.1, 142.1, 128.7, 128.6, 128.5, 128.4, 128.1, 127.8, 126.4, 126.3, 125.9, 69.6, 47.7, 43.3, 39.8, 32.1. IR (film): 3366, 3060, 2928, 1600, 1494, 1451, 763; HRMS (ESI-TOF) exact mass calculated for C<sub>23</sub>H<sub>28</sub>NO [M+NH<sub>4</sub>]<sup>+</sup> 334.2165, found 334.2165.

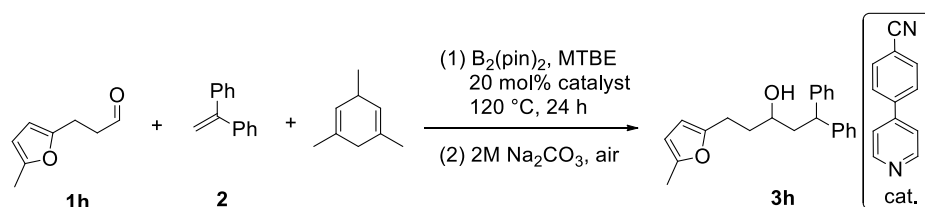

**3h:** Prepared following *general procedure* using **1h** (27.6 mg, 0.2 mmol, 1.0 equiv), 1,1-diphenylethylene (70.6 μL, 0.4 mmol, 2.0 equiv), B<sub>2</sub>(pin)<sub>2</sub> (50.8 mg), 1,3,5-trimethyl-1,4-cyclohexadiene (24.5 mg, 0.2 mmol, 1.0 equiv), 4-(4-pyridinyl)benzonitrile (7.2 mg, 20 mol%) and MTBE (1 mL) at 120 °C. After 24 h, following the described step, the reaction mixture was isolated with prepared TLC on silica (PE/EA = 50:1) to afford the product **3h** (29 mg, 46% yield).

**3h:** Colorless oil; <sup>1</sup>H NMR (400 MHz, CDCl<sub>3</sub>) δ 7.31 – 7.25 (m, 8H), 7.21 – 7.16 (m, 2H), 5.81 (m, 2H), 4.25 (dd, *J* = 9.9, 5.9 Hz, 1H), 3.59 – 3.51 (m, 1H), 2.74 – 2.60 (m, 2H), 2.31 – 2.25 (m, 1H), 2.23 (s, 3H), 2.20 – 2.14 (m, 1H), 1.87 – 1.75 (m, 2H), 1.61 (brs, 1H, with -OH). <sup>13</sup>C NMR (100 MHz, CDCl<sub>3</sub>) δ 153.9, 150.4, 145.2, 144.1, 128.6, 128.6, 128.1, 127.8, 126.4, 126.3, 105.9, 105.6, 69.3, 47.6, 43.3, 36.4, 24.4, 13.6. IR (film): 3565, 3060, 2921, 1966, 1599, 1450, 1218, 1062; HRMS (ESI-TOF) exact mass calculated for C<sub>22</sub>H<sub>24</sub>NaO<sub>2</sub> [M+Na]<sup>+</sup> 343.1669, found 343.1663.

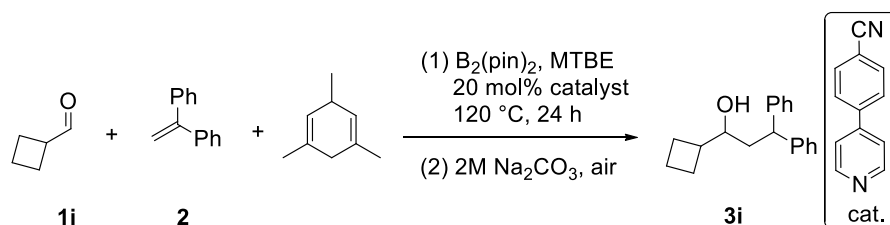

**3i:** Prepared following *general procedure* using **1i** (16.8 mg, 0.2 mmol, 1.0 equiv), 1,1-diphenylethylene (70.6 μL, 0.4 mmol, 2.0 equiv), B<sub>2</sub>(pin)<sub>2</sub> (50.8 mg), 1,3,5-trimethyl-1,4-cyclohexadiene (24.5 mg, 0.2 mmol, 1.0 equiv), 4-(4-pyridinyl)benzonitrile (7.2 mg, 20 mol%) and MTBE (1 mL) at 120 °C. After 24

h, following the described step, the reaction mixture was isolated with prepared TLC on silica (PE/EA = 50:1) to afford the product **3i** (34 mg, 63% yield).

**3i**: Colorless oil;  $^1\text{H}$  NMR (400 MHz,  $\text{CDCl}_3$ )  $\delta$  7.34 – 7.25 (m, 8H), 7.24 – 7.14 (m, 2H), 4.27 (dd,  $J = 10.9, 5.0$  Hz, 1H), 3.39 – 3.32 (m, 1H), 2.40 – 2.32 (m, 1H), 2.23 – 2.14 (m, 1H), 2.00 – 1.65 (m, 8H, with -OH).  $^{13}\text{C}$  NMR (100 MHz,  $\text{CDCl}_3$ )  $\delta$  145.6, 144.1, 128.6, 128.5, 128.2, 127.7, 126.4, 126.2, 73.4, 47.4, 41.8, 40.3, 24.3, 24.1, 17.9; IR (film): 3383, 3060, 2933, 2857, 1493, 1449, 1074, 749; HRMS (ESI-TOF) exact mass calculated for  $\text{C}_{19}\text{H}_{26}\text{NO}$   $[\text{M}+\text{NH}_4]^+$  284.2009, found 284.1998.

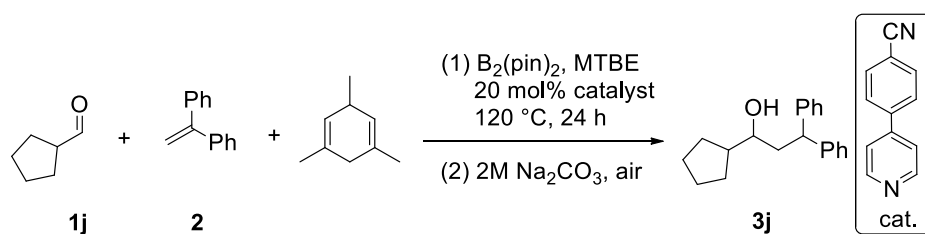

**3j**: Prepared following *general procedure* using **1j** (21.6  $\mu\text{L}$ , 0.2 mmol, 1.0 equiv), 1,1-diphenylethylene (70.6  $\mu\text{L}$ , 0.4 mmol, 2.0 equiv),  $\text{B}_2(\text{pin})_2$  (50.8 mg), 1,3,5-trimethyl-1,4-cyclohexadiene (24.5 mg, 0.2 mmol, 1.0 equiv), 4-(4-pyridinyl)benzonitrile (7.2 mg, 20 mol%) and MTBE (1 mL) at 120  $^\circ\text{C}$ . After 24 h, following the described step, the reaction mixture was isolated with prepared TLC on silica (PE/EA = 50:1) to afford the product **3j** (41 mg, 74% yield). NMR spectrums of the compounds **3j** are consistent with previous reported results.<sup>[15]</sup>

**3j**: Colorless oil;  $^1\text{H}$  NMR (400 MHz,  $\text{CDCl}_3$ )  $\delta$  7.32 – 7.26 (m, 8H), 7.23 – 7.15 (m, 2H), 4.31 (dd,  $J = 11.1, 4.7$  Hz, 1H), 3.31 – 3.25 (m, 1H), 2.37 – 2.29 (m, 1H), 2.08 – 1.99 (m, 1H), 1.95 – 1.86 (m, 1H), 1.80 – 1.68 (m, 2H), 1.61 – 1.50 (m, 4H, with -OH), 1.36 – 1.23 (m, 2H), 1.19 – 1.12 (m, 1H).  $^{13}\text{C}$  NMR (100 MHz,  $\text{CDCl}_3$ )  $\delta$  145.7, 144.1, 128.6, 128.5, 128.3, 127.7, 126.3, 126.2, 73.6, 47.6, 47.0, 42.2, 29.2, 28.5, 25.8, 25.7. IR (film): 3385, 3060, 3025, 2049, 2866, 1599, 1493, 750; HRMS (ESI-TOF) exact mass calculated for  $\text{C}_{20}\text{H}_{28}\text{NO}$   $[\text{M}+\text{NH}_4]^+$  298.2165, found 298.2169.

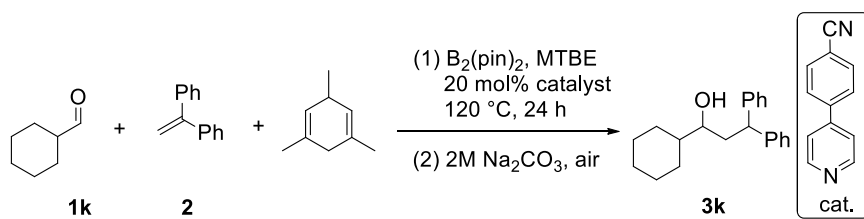

**3k**: Prepared following *general procedure* using **1k** (24.2  $\mu\text{L}$ , 0.2 mmol, 1.0 equiv), 1,1-diphenylethylene (70.6  $\mu\text{L}$ , 0.4 mmol, 2.0 equiv),  $\text{B}_2(\text{pin})_2$  (50.8 mg), 1,3,5-trimethyl-1,4-cyclohexadiene (24.5 mg, 0.2 mmol, 1.0 equiv), 4-(4-pyridinyl)benzonitrile (7.2 mg, 20 mol%) and MTBE (1 mL) at 120  $^\circ\text{C}$ . After 24 h, following the described step, the reaction mixture was isolated with prepared TLC on silica (PE/EA = 50:1) to afford the product **3k** (45 mg, 76% yield). NMR spectrums of the compounds **3k** are consistent with previous reported results.<sup>[15]</sup>

**3k**: Colorless oil;  $^1\text{H}$  NMR (400 MHz,  $\text{CDCl}_3$ )  $\delta$  7.34 – 7.27 (m, 8H), 7.23 – 7.14 (m, 2H), 4.28 (dd,  $J = 11.0, 4.8$  Hz, 1H), 3.28 – 3.23 (m, 1H), 2.36 – 2.27 (m, 1H), 2.08 – 1.99 (m, 1H), 1.82 – 1.63 (m, 5H, with -OH), 1.37 – 0.97 (m, 7H).  $^{13}\text{C}$  NMR (100 MHz,  $\text{CDCl}_3$ )  $\delta$  145.8, 144.0, 128.6, 128.5, 128.3, 127.8, 126.3, 126.2, 73.8, 47.7, 44.3, 40.1, 29.2, 27.8, 26.6, 26.4, 26.3. IR (film): 3390, 3060, 2924, 2815, 1738, 1494, 1031, 739; HRMS (ESI-TOF) exact mass calculated for  $\text{C}_{21}\text{H}_{26}\text{NaO}$  [ $\text{M}+\text{Na}$ ] $^+$  317.1876, found 317.1887.

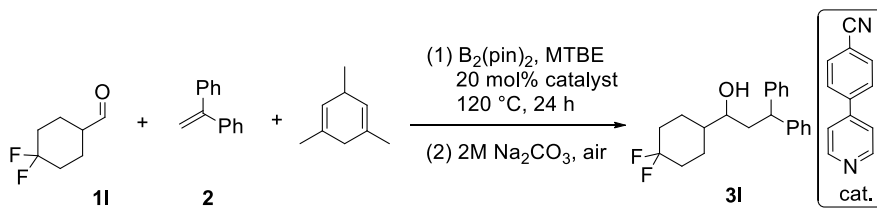

**3l**: Prepared following *general procedure* using **1l** (27.0  $\mu\text{L}$ , 0.2 mmol, 1.0 equiv), 1,1-diphenylethylene (70.6  $\mu\text{L}$ , 0.4 mmol, 2.0 equiv),  $\text{B}_2(\text{pin})_2$  (50.8 mg), 1,3,5-trimethyl-1,4-cyclohexadiene (24.5 mg, 0.2 mmol, 1.0 equiv), 4-(4-pyridinyl)benzonitrile (7.2 mg, 20 mol%) and MTBE (1 mL) at 120  $^\circ\text{C}$ . After 24 h, following the described step, the reaction mixture was isolated with prepared TLC on silica (PE/EA = 50:1) to afford the product **3l** (34 mg, 51% yield).

**3l**: Colorless oil;  $^1\text{H}$  NMR (400 MHz,  $\text{CDCl}_3$ )  $\delta$  7.34 – 7.25 (m, 8H), 7.23 – 7.15 (m, 2H), 4.25 (dd,  $J = 10.8, 5.0$  Hz, 1H), 3.37 – 3.31 (m, 1H), 2.26 – 2.34 (m, 1H),

2.16 – 2.02 (m, 3H), 1.88 – 1.81 (m, 1H), 1.76 – 1.58 (m, 4H), 1.44 – 1.36 (m, 3H);  $^{13}\text{C}$  NMR (100 MHz,  $\text{CDCl}_3$ )  $\delta$  145.3, 143.7, 128.8 and 128.7 ( $d_{\text{C-F}}$ ,  $J = 11.3$  Hz), 128.2, 127.7, 126.6, 126.4, 72.7, 47.8, 42.5, 40.4, 33.8 (d,  $J_{\text{C-F}} = 10.0$  Hz), 33.56 (dd,  $J_{\text{C-F}} = 9.9, 3.0$  Hz), 33.32 (d,  $J_{\text{C-F}} = 9.7$  Hz), 25.2 (d,  $J_{\text{C-F}} = 9.9$  Hz). 24.1 (d,  $J_{\text{C-F}} = 9.9$  Hz);  $^{19}\text{F}$  NMR (376 MHz,  $\text{CDCl}_3$ )  $\delta$  -91.3 (d,  $J = 234.9$  Hz), -102.4 (d,  $J = 234.8$  Hz). IR (film): 3586, 3060, 2938, 1732, 1599, 1494, 1114, 1002, 702; HRMS (ESI-TOF) exact mass calculated for  $\text{C}_{21}\text{H}_{24}\text{F}_2\text{NaO}$   $[\text{M}+\text{Na}]^+$  353.1687, found 353.1677.

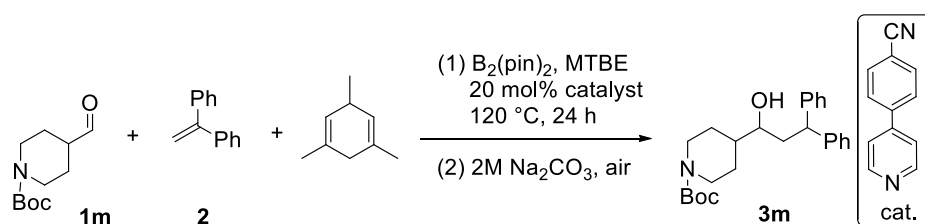

**3m**: Prepared following *general procedure* using **1m** (42.6 mg, 0.2 mmol, 1.0 equiv), 1,1-diphenylethylene (70.6  $\mu\text{L}$ , 0.4 mmol, 2.0 equiv),  $\text{B}_2(\text{pin})_2$  (50.8 mg), 1,3,5-trimethyl-1,4-cyclohexadiene (24.5 mg, 0.2 mmol, 1.0 equiv), 4-(4-pyridinyl)benzocyanide (7.2 mg, 20 mol%) and MTBE (1 mL) at 120  $^\circ\text{C}$ . After 24 h, following the described step, the reaction mixture was isolated with prepared TLC on silica (PE/EA = 10:1) to afford the product **3m** (56 mg, 71% yield).

**3m**: Colorless oil;  $^1\text{H}$  NMR (400 MHz,  $\text{CDCl}_3$ )  $\delta$  7.26 – 7.18 (m, 8H), 7.16 – 7.08 (m, 2H), 4.21 (dd,  $J = 11.0, 4.7$  Hz, 1H), 4.07 (br, 2H), 3.24 – 3.18 (m, 1H), 2.57 (br, 2H), 2.29 – 2.22 (m, 1H), 2.02 – 1.94 (m, 1H), 1.80 (brs, 1H, with-OH), 1.69 – 1.63 (m, 1H), 1.56 – 1.49 (m, 1H), 1.39 (s, 9H), 1.22 – 1.08 (m, 3H);  $^{13}\text{C}$  NMR (100 MHz,  $\text{CDCl}_3$ )  $\delta$  254.8, 145.4, 143.7, 128.7, 128.6, 128.2, 127.7, 126.5, 126.2, 79.4, 72.8, 47.6, 43.7, 42.7, 40.1, 28.5, 28.2; IR (film): 3445, 2975, 2855, 1668, 1449, 1365, 1168, 739; HRMS (ESI-TOF) exact mass calculated for  $\text{C}_{25}\text{H}_{33}\text{NaNO}_3$   $[\text{M}+\text{Na}]^+$  418.2353, found 418.2357.

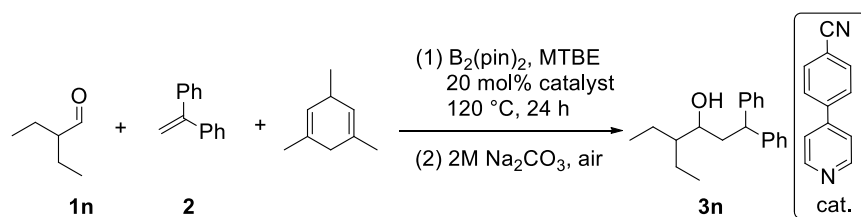

**3n**: Prepared following *general procedure* using **1n** (24.6  $\mu\text{L}$ , 0.2 mmol, 1.0 equiv), 1,1-diphenylethylene (70.6  $\mu\text{L}$ , 0.4 mmol, 2.0 equiv),  $\text{B}_2(\text{pin})_2$  (50.8 mg), 1,3,5-trimethyl-1,4-cyclohexadiene (24.5 mg, 0.2 mmol, 1.0 equiv), 4-(4-pyridinyl)benzotrile (7.2 mg, 20 mol%) and MTBE (1 mL) at 120  $^\circ\text{C}$ . After 24 h, following the described step, the reaction mixture was isolated with prepared TLC on silica (PE/EA = 50:1) to afford the product **3n** (33 mg, 59% yield).

**3n**: Colorless oil;  $^1\text{H}$  NMR (400 MHz,  $\text{CDCl}_3$ )  $\delta$  7.34 – 7.25 (m, 8H), 7.24 – 7.15 (m, 2H), 4.26 (dd,  $J = 10.7, 5.1$  Hz, 1H), 3.56 – 3.49 (m, 1H), 2.30 – 2.22 (m, 1H), 2.12 – 2.03 (m, 1H), 1.46 – 1.21 (m, 6H, with -OH), 0.84 (t,  $J = 7.4$  Hz, 6H);  $^{13}\text{C}$  NMR (100 MHz,  $\text{CDCl}_3$ )  $\delta$  145.6, 144.1, 128.6, 128.6, 128.2, 127.8, 126.4, 126.2, 70.9, 47.9, 47.6, 39.7, 22.1, 21.6, 12.1, 11.9; IR (film): 3396, 3026, 2960, 2873, 1493, 1450, 1031, 700; HRMS (ESI-TOF) exact mass calculated for  $\text{C}_{20}\text{H}_{26}\text{NaO}$  [ $\text{M}+\text{Na}$ ] $^+$  305.1876, found 305.1877.

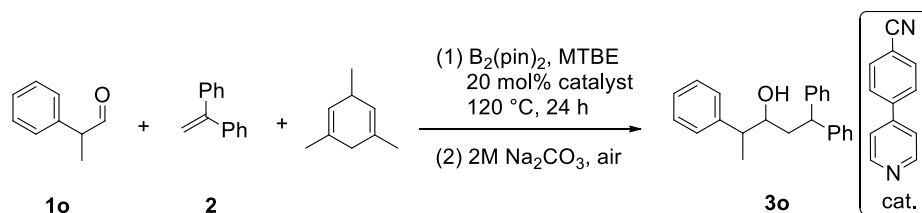

**3o**: Prepared following *general procedure* using **1o** (26.8  $\mu\text{L}$ , 0.2 mmol, 1.0 equiv), 1,1-diphenylethylene (70.6  $\mu\text{L}$ , 0.4 mmol, 2.0 equiv),  $\text{B}_2(\text{pin})_2$  (50.8 mg), 1,3,5-trimethyl-1,4-cyclohexadiene (24.5 mg, 0.2 mmol, 1.0 equiv), 4-(4-pyridinyl)benzotrile (7.2 mg, 20 mol%) and MTBE (1 mL) at 120  $^\circ\text{C}$ . After 24 h, following the described step, the reaction mixture was isolated with prepared TLC on silica (PE/EA = 50:1) to afford the product **3o** (36 mg, 59% yield, d.r. =1:1). The diastereoselectivities (d. r.) was determined by  $^1\text{H}$  NMR analysis of the crude mixture. The two diastereomers were not separated by preparative TLC. Reported as a mixture of diastereomers.

**3o**: Colorless oil;  $^1\text{H}$  NMR (400 MHz,  $\text{CDCl}_3$ )  $\delta$  7.36 – 7.16 (m, 15H), 4.34 (dd,  $J = 11.3, 4.5$  Hz, 1H), 3.57 – 3.51 (m, 1H), 2.85 – 2.77 (m, 1H), 2.48 – 2.44 (m, 1H), 2.02 – 1.94 (m, 1H), 1.31 (d,  $J = 7.0$  Hz, 3H);  $^{13}\text{C}$  NMR (100 MHz,  $\text{CDCl}_3$ )  $\delta$  145.7, 143.8, 143.2, 128.7, 128.6, 128.5, 128.3, 128.3, 127.8, 126.8, 126.3, 126.1, 73.8, 47.4,

46.6, 40.6, 17.6; IR (film): 3566, 3059, 3025, 1597, 1493, 1450, 1060, 700; HRMS (ESI-TOF) exact mass calculated for C<sub>23</sub>H<sub>24</sub>NaO [M+Na]<sup>+</sup> 339.1719, found 339.1717.

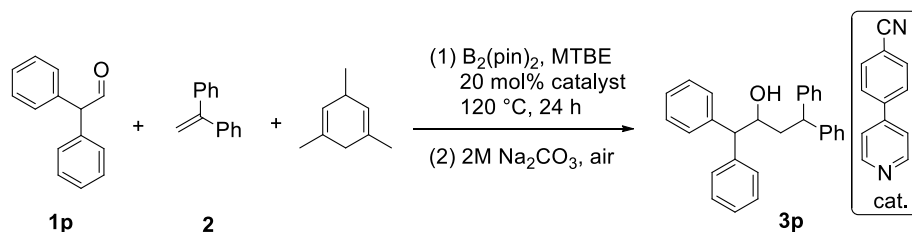

**3p:** Prepared following *general procedure* using **1p** (35.5  $\mu$ L, 0.2 mmol, 1.0 equiv), 1,1-diphenylethylene (70.6  $\mu$ L, 0.4 mmol, 2.0 equiv), B<sub>2</sub>(pin)<sub>2</sub> (50.8 mg), 1,3,5-trimethyl-1,4-cyclohexadiene (24.5 mg, 0.2 mmol, 1.0 equiv), 4-(4-pyridinyl)benzonitrile (7.2 mg, 20 mol%) and MTBE (1 mL) at 120 °C. After 24 h, following the described step, the reaction mixture was isolated with prepared TLC on silica (PE/EA = 50:1) to afford the product **3p** (42 mg, 56% yield).

**3p:** Colorless oil; <sup>1</sup>H NMR (400 MHz, CDCl<sub>3</sub>)  $\delta$  7.33 – 7.06 (m, 20H), 4.34 – 4.27 (m, 1H), 4.17 – 4.08 (m, 1H), 3.88 (dd, *J* = 9.1, 5.5 Hz, 1H), 2.34 – 2.23 (m, 1H), 2.06 – 1.96 (m, 1H). 1.61 (brs, 1H, with -OH); <sup>13</sup>C NMR (100 MHz, CDCl<sub>3</sub>)  $\delta$  145.5, 143.6, 142.1, 141.5, 128.9, 128.8, 128.7, 128.6, 128.5, 128.4, 128.3, 127.7, 126.9, 126.7, 126.4, 126.1, 71.5, 59.5, 47.4, 41.1; IR (film): 3566, 3059, 3025, 1597, 1493, 1450, 1060, 700; HRMS (ESI-TOF) exact mass calculated for C<sub>28</sub>H<sub>26</sub>NaO [M+Na]<sup>+</sup> 401.1876, found 401.1875.

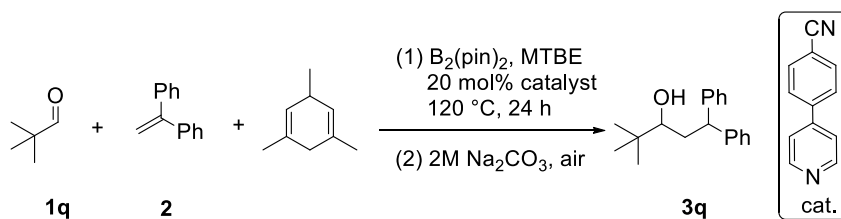

**3q:** Prepared following *general procedure* using **1q** (21.7  $\mu$ L, 0.2 mmol, 1.0 equiv), 1,1-diphenylethylene (70.6  $\mu$ L, 0.4 mmol, 2.0 equiv), B<sub>2</sub>(pin)<sub>2</sub> (50.8 mg), 1,3,5-trimethyl-1,4-cyclohexadiene (24.5 mg, 0.2 mmol, 1.0 equiv), 4-(4-pyridinyl)benzonitrile (7.2 mg, 20 mol%) and MTBE (1 mL) at 120 °C. After 24 h, following the described step, the reaction mixture was isolated with prepared TLC on silica (PE/EA = 50:1) to afford the product **3q** (38 mg, 71% yield). NMR spectrums of the compounds **3q** are consistent with previous reported results.<sup>[15]</sup>

**3q**: Colorless oil;  $^1\text{H}$  NMR (400 MHz,  $\text{CDCl}_3$ )  $\delta$  7.41-7.28 (m, 8H), 7.28-7.16 (m, 2H), 4.34 (dd,  $J = 11.6, 2.4$  Hz, 1H), 3.14 (d,  $J = 10.7$  Hz, 1H), 2.45-2.35 (m, 1H), 2.01-1.92 (m, 1H), 1.56 (brs, 1H, with -OH), 0.92 (s, 9H).  $^{13}\text{C}$  NMR (100 MHz,  $\text{CDCl}_3$ )  $\delta$  146.0, 143.8, 128.6, 128.5, 128.4, 127.7, 126.4, 126.1, 77.3, 48.0, 37.6, 35.0, 25.7. IR (film): 3464, 3060, 3026, 2956, 1598, 1493, 1477, 1030, 700; HRMS (ESI-TOF) exact mass calculated for  $\text{C}_{19}\text{H}_{24}\text{NaO}$   $[\text{M}+\text{Na}]^+$  291.1719, found 291.1713.

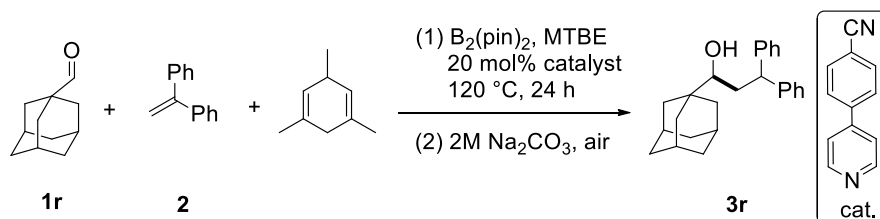

**3r**: Prepared following *general procedure* using **1r** (32.9 mg, 0.2 mmol, 1.0 equiv), 1,1-diphenylethylene (70.6  $\mu\text{L}$ , 0.4 mmol, 2.0 equiv),  $\text{B}_2(\text{pin})_2$  (50.8 mg), 1,3,5-trimethyl-1,4-cyclohexadiene (24.5 mg, 0.2 mmol, 1.0 equiv), 4-(4-pyridinyl)benzonitrile (7.2 mg, 20 mol%) and MTBE (1 mL) at 120  $^\circ\text{C}$ . After 24 h, following the described step, the reaction mixture was isolated with prepared TLC on silica (PE/EA = 10:1) to afford the product **3r** (41 mg, 60% yield).

**3r**: White solid, 134.6-136.6  $^\circ\text{C}$ ;  $^1\text{H}$  NMR (400 MHz,  $\text{CDCl}_3$ )  $\delta$  7.35 – 7.25 (m, 8H), 7.24 – 7.15 (m, 2H), 4.31 (dd,  $J = 11.7, 4.0$  Hz, 1H), 2.97 – 2.92 (m, 1H), 2.43 – 2.34 (m, 1H), 2.00 (brs, 2H, with -OH), 1.75 – 1.61 (m, 7H), 1.60 – 1.47 (m, 8H);  $^{13}\text{C}$  NMR (100 MHz,  $\text{CDCl}_3$ )  $\delta$  146.2, 143.8, 128.6, 128.5, 128.4, 127.8, 126.3, 126.1, 77.4, 47.9, 38.0, 37.3, 36.8, 36.2, 28.4; IR (film): 3446, 3025, 2903, 2847, 1493, 1449, 1050, 700; HRMS (ESI-TOF) exact mass calculated for  $\text{C}_{25}\text{H}_{30}\text{NaO}$   $[\text{M}+\text{Na}]^+$  369.2189, found 369.2180.

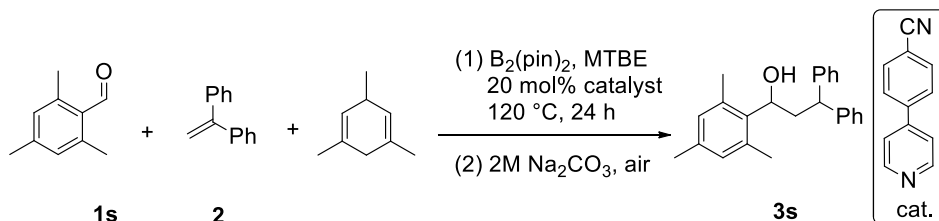

**3s**: Prepared following *general procedure* using **1s** (29.6  $\mu\text{L}$ , 0.2 mmol, 1.0 equiv), 1,1-diphenylethylene (70.6  $\mu\text{L}$ , 0.4 mmol, 2.0 equiv),  $\text{B}_2(\text{pin})_2$  (50.8 mg), 1,3,5-trimethyl-1,4-cyclohexadiene (24.5 mg, 0.2 mmol, 1.0 equiv),

4-(4-pyridinyl)benzotrile (7.2 mg, 20 mol%) and MTBE (1 mL) at 120 °C. After 24 h, following the described step, the reaction mixture was isolated with prepared TLC on silica (PE/EA = 50:1) to afford the product **3s** (30 mg, 46% yield).

**3s**: Colorless oil; <sup>1</sup>H NMR (400 MHz, CDCl<sub>3</sub>) δ 7.34 – 7.26 (m, 8H), 7.25 – 7.16 (m, 2H), 6.80 (s, 2H), 4.93 (dd, *J* = 10.3, 3.4 Hz, 1H), 4.33 (dd, *J* = 11.0, 4.8 Hz, 1H), 2.80 – 2.72 (m, 1H), 2.35 – 2.14 (m, 10H); <sup>13</sup>C NMR (100 MHz, CDCl<sub>3</sub>) δ 145.0, 144.4, 136.9, 136.7, 136.2, 130.2, 128.7, 128.6, 128.3, 127.8, 126.5, 126.3, 69.0, 47.9, 41.2, 20.8, 20.4; IR (film): 3558, 3025, 2921, 1609, 1493, 1450, 1053, 701; HRMS (ESI-TOF) exact mass calculated for C<sub>24</sub>H<sub>26</sub>NaO [M+Na]<sup>+</sup> 353.1876, found 353.1879.

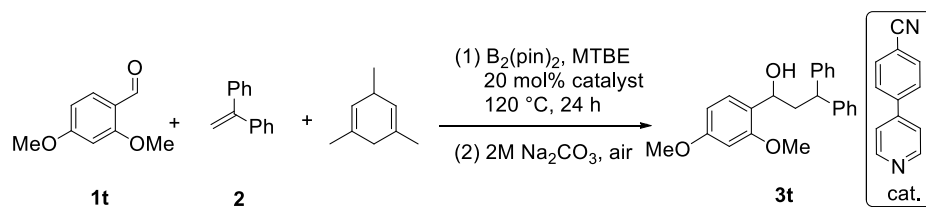

**3t**: Prepared following *general procedure* using **1t** (33.2 mg, 0.2 mmol, 1.0 equiv), 1,1-diphenylethylene (70.6 μL, 0.4 mmol, 2.0 equiv), B<sub>2</sub>(pin)<sub>2</sub> (50.8 mg), 1,3,5-trimethyl-1,4-cyclohexadiene (24.5 mg, 0.2 mmol, 1.0 equiv), 4-(4-pyridinyl)benzotrile (7.2 mg, 20 mol%) and MTBE (1 mL) at 120 °C. After 24 h, following the described step, the reaction mixture was isolated with prepared TLC on silica (PE/EA = 50:1) to afford the product **3t** (33 mg, 46% yield).

**3t**: Colorless oil; <sup>1</sup>H NMR (400 MHz, CDCl<sub>3</sub>) δ 7.35 – 7.25 (m, 8H), 7.23 – 7.10 (m, 3H), 6.48 – 6.43 (m, 2H), 4.66 – 4.61 (m, 1H), 4.24 – 4.18 (m, 1H), 3.81 (s, 3H), 3.77 (s, 3H), 2.61 – 2.46 (m, 3H, with -OH); <sup>13</sup>C NMR (100 MHz, CDCl<sub>3</sub>) δ 160.2, 157.7, 145.3, 144.3, 128.6, 128.5, 128.2, 127.9, 127.7, 126.2, 126.1, 124.9, 104.0, 98.8, 69.1, 55.4, 55.2, 47.8, 43.1; IR (film): 3445, 3025, 2934, 2835, 1613, 1504, 1207, 749; HRMS (ESI-TOF) exact mass calculated for C<sub>23</sub>H<sub>24</sub>NaO<sub>3</sub> [M+Na]<sup>+</sup> 371.1618, found 371.1615.

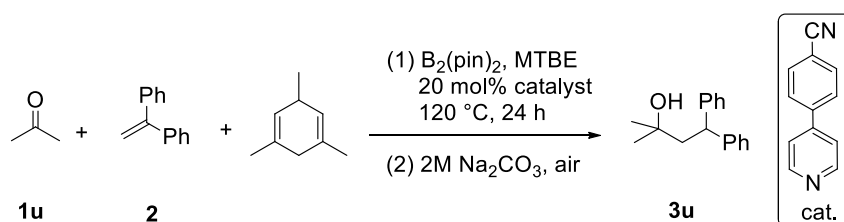



**3u**: Prepared following *general procedure* using **1u** (14.7  $\mu$ L, 0.2 mmol, 1.0 equiv), 1,1-diphenylethylene (70.6  $\mu$ L, 0.4 mmol, 2.0 equiv),  $B_2(\text{pin})_2$  (50.8 mg), 1,3,5-trimethyl-1,4-cyclohexadiene (24.5 mg, 0.2 mmol, 1.0 equiv), 4-(4-pyridinyl)benzotrile (7.2 mg, 20 mol%) and MTBE (1 mL) at 120  $^\circ\text{C}$ . After 24 h, following the described step, the reaction mixture was isolated with prepared TLC on silica (PE/EA = 50:1) to afford the product **3u** (20 mg, 42% yield).

**3u**: Colorless oil;  $^1\text{H}$  NMR (400 MHz,  $\text{CDCl}_3$ )  $\delta$  7.35 – 7.26 (m, 8H), 7.20 – 7.14 (m, 2H), 4.23 (t,  $J = 7.0$  Hz, 1H), 2.41 – 2.37 (d,  $J = 7.0$  Hz, 2H), 1.74 (brs, 1H, -OH), 1.19 (s, 6H);  $^{13}\text{C}$  NMR (100 MHz,  $\text{CDCl}_3$ )  $\delta$  145.7, 128.7, 127.8, 126.3, 71.5, 48.8, 47.6, 30.1; IR (film): 3566, 3419, 3060, 2969, 1493, 1373, 1133, 743; HRMS (ESI-TOF) exact mass calculated for  $\text{C}_{17}\text{H}_{20}\text{NaO}$   $[\text{M}+\text{Na}]^+$  263.1406, found 263.1400.

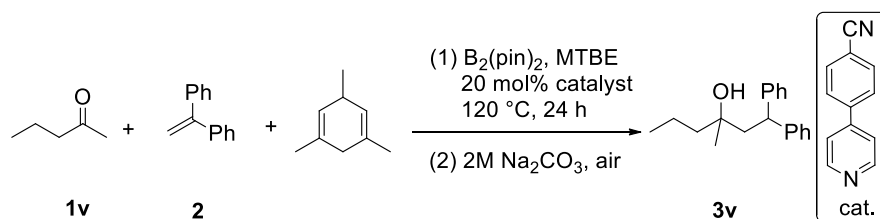

**3v**: Prepared following *general procedure* using **1v** (21.3  $\mu$ L, 0.2 mmol, 1.0 equiv), 1,1-diphenylethylene (70.6  $\mu$ L, 0.4 mmol, 2.0 equiv),  $B_2(\text{pin})_2$  (50.8 mg), 1,3,5-trimethyl-1,4-cyclohexadiene (24.5 mg, 0.2 mmol, 1.0 equiv), 4-(4-pyridinyl)benzotrile (7.2 mg, 20 mol%) and MTBE (1 mL) at 120  $^\circ\text{C}$ . After 24 h, following the described step, the reaction mixture was isolated with prepared TLC on silica (PE/EA = 50:1) to afford the product **3v** (17 mg, 27% yield).

**3v**: Colorless oil;  $^1\text{H}$  NMR (400 MHz,  $\text{CDCl}_3$ )  $\delta$  7.34 – 7.26 (m, 8H), 7.19 – 7.14 (m, 2H), 4.21 (t,  $J = 7.0$  Hz, 1H), 2.35 (dd,  $J = 7.0, 1.5$  Hz, 2H), 1.64 (brs, 1H, -OH), 1.46 – 1.41 (m, 2H), 1.33 – 1.27 (m, 2H), 1.11 (s, 3H), 0.85 (t,  $J = 7.2$  Hz, 3H);  $^{13}\text{C}$  NMR (100 MHz,  $\text{CDCl}_3$ )  $\delta$  145.8, 128.7, 127.8, 126.3, 73.4, 47.2, 47.0, 45.3, 27.5, 17.3, 14.7; IR (film): 3566, 3446, 3025, 2958, 2931, 1493, 1451, 1030, 702; HRMS (ESI-TOF) exact mass calculated for  $\text{C}_{19}\text{H}_{24}\text{NaO}$   $[\text{M}+\text{Na}]^+$  291.1719, found 291.1715.

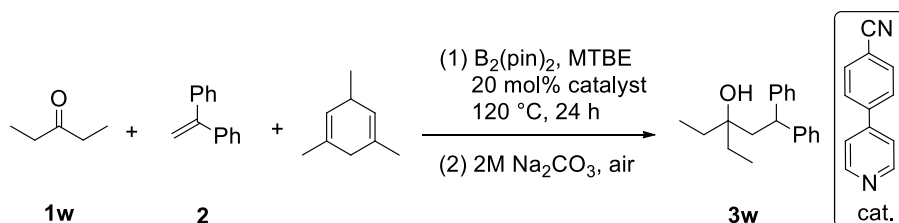

**3w:** Prepared following *general procedure* using **1w** (21.0  $\mu\text{L}$ , 0.2 mmol, 1.0 equiv), 1,1-diphenylethylene (70.6  $\mu\text{L}$ , 0.4 mmol, 2.0 equiv),  $\text{B}_2(\text{pin})_2$  (50.8 mg), 1,3,5-trimethyl-1,4-cyclohexadiene (24.5 mg, 0.2 mmol, 1.0 equiv), 4-(4-pyridinyl)benzonitrile (7.2 mg, 20 mol%) and MTBE (1 mL) at 120  $^\circ\text{C}$ . After 24 h, following the described step, the reaction mixture was isolated with prepared TLC on silica (PE/EA = 50:1) to afford the product **3w** (17 mg, 27% yield).

**3w:** Colorless oil;  $^1\text{H NMR}$  (400 MHz,  $\text{CDCl}_3$ )  $\delta$  7.35 – 7.25 (m, 8H), 7.19 – 7.14 (m, 2H), 4.19 (t,  $J = 6.9$  Hz, 1H), 2.32 (d,  $J = 6.9$  Hz, 2H), 1.62 (brs, 1H, -OH), 1.47 (t,  $J = 7.5$  Hz, 4H), 0.80 (d,  $J = 7.5$  Hz, 6H);  $^{13}\text{C NMR}$  (100 MHz,  $\text{CDCl}_3$ )  $\delta$  145.8, 128.7, 127.9, 126.3, 75.4, 46.8, 44.1, 31.3, 8.0; IR (film): 3586, 2966, 2937, 1598, 1493, 1451, 973, 745; HRMS (ESI-TOF) exact mass calculated for  $\text{C}_{19}\text{H}_{24}\text{NaO}$   $[\text{M}+\text{Na}]^+$  291.1719, found 291.1719.

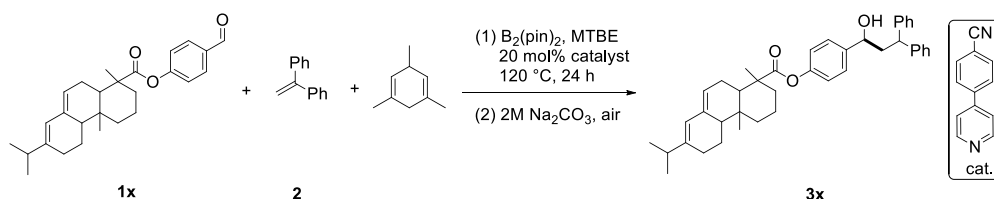

**3x:** Prepared following *general procedure* using **1x** (61.2 mg, 0.2 mmol, 1.0 equiv), 1,1-diphenylethylene (70.6  $\mu\text{L}$ , 0.4 mmol, 2.0 equiv),  $\text{B}_2(\text{pin})_2$  (50.8 mg), 1,3,5-trimethyl-1,4-cyclohexadiene (24.5 mg, 0.2 mmol, 1.0 equiv), 4-(4-pyridinyl)benzonitrile (7.2 mg, 20 mol%) and MTBE (1 mL) at 120  $^\circ\text{C}$ . After 24 h, following the described step, the reaction mixture was isolated with prepared TLC on silica (PE/EA = 10:1) to afford the product **3x** (47 mg, 40% yield).

**3x:** Colorless oil;  $^1\text{H NMR}$  (400 MHz,  $\text{CDCl}_3$ )  $\delta$  7.31 – 7.23 (m, 10H), 7.22 – 7.13 (m, 2H), 6.97 (m, 2H), 5.81 (s, 1H), 5.42 (s, 1H), 4.47 (dd,  $J = 8.4, 5.1$  Hz, 1H), 4.11 (m, 1H), 2.56 – 2.46 (m, 1H), 2.44 – 2.35 (m, 1H), 2.28 – 2.20 (m, 2H), 2.12 – 2.07 (m, 2H), 2.03 – 1.90 (m, 5H, with -OH), 1.88 – 1.78 (m, 2H), 1.69 – 1.61 (m,

2H), 1.38 (s, 3H), 1.30 – 1.18 (m, 3H), 1.05 – 0.99 (m, 6H), 0.89 (s, 3H);  $^{13}\text{C}$  NMR (100 MHz,  $\text{CDCl}_3$ )  $\delta$  177.2, 150.6, 145.6, 144.6, 144.2, 142.0, 135.7, 128.70, 128.6, 128.0, 127.9, 127.1, 126.4, 126.3, 122.4, 121.7, 120.5, 71.9, 51.0, 47.6, 47.0, 45.2, 44.8, 38.3, 37.1, 35.0, 34.7, 27.5, 25.9, 22.6, 21.5, 20.9, 18.2, 17.2, 14.1; IR (film): 3467, 2929, 1744, 1504, 1227, 1199, 1057, 908, 734; HRMS (ESI-TOF) exact mass calculated for  $\text{C}_{41}\text{H}_{48}\text{KO}_3$   $[\text{M}+\text{K}]^+$  627.3235, found 627.3234.

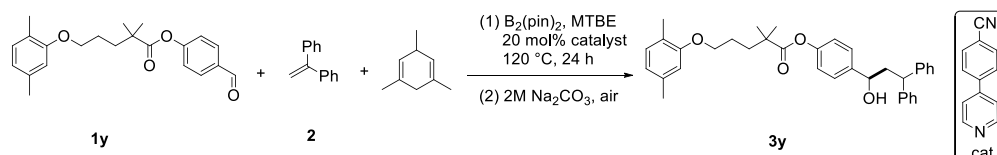

**3y:** Prepared following *general procedure* using **1y** (61.2 mg, 0.2 mmol, 1.0 equiv), 1,1-diphenylethylene (70.6  $\mu\text{L}$ , 0.4 mmol, 2.0 equiv),  $\text{B}_2(\text{pin})_2$  (50.8 mg), 1,3,5-trimethyl-1,4-cyclohexadiene (24.5 mg, 0.2 mmol, 1.0 equiv), 4-(4-pyridinyl)benzonitrile (7.2 mg, 20 mol%) and MTBE (1 mL) at 120  $^\circ\text{C}$ . After 24 h, following the described step, the reaction mixture was isolated with prepared TLC on silica (PE/EA = 10:1) to afford the product **3y** (34 mg, 32% yield).

**3y:** Colorless oil;  $^1\text{H}$  NMR (400 MHz,  $\text{CDCl}_3$ )  $\delta$  7.32 – 7.24 (m, 10H), 7.23 – 7.13 (m, 2H), 7.04 – 6.96 (m, 3H), 6.69 – 6.60 (m, 2H), 4.49 (dd,  $J = 8.5, 5.1$  Hz, 1H), 4.12 (dd,  $J = 9.1, 6.8$  Hz, 1H), 3.98 (m, 2H), 2.51 (m, 1H), 2.40 (m, 1H), 2.30 (s, 3H), 2.18 (s, 3H), 1.88 (d,  $J = 2.6$  Hz, 5H, with-OH), 1.37 (s, 6H);  $^{13}\text{C}$  NMR (100 MHz,  $\text{CDCl}_3$ )  $\delta$  176.5, 156.9, 150.5, 144.6, 142.2, 142.1, 136.6, 130.4, 128.7, 128.6, 128.1, 127.9, 127.1, 126.4, 126.4, 123.7, 121.7, 120.8, 112.0, 71.9, 67.9, 47.6, 44.8, 42.5, 37.2, 25.4, 25.2, 25.2, 21.5, 15.9; IR (film): 3428, 2924, 1749, 1507, 1264, 1198, 1115, 1046, 701; HRMS (ESI-TOF) exact mass calculated for  $\text{C}_{36}\text{H}_{40}\text{NaO}_4$   $[\text{M}+\text{Na}]^+$  559.2819, found 559.2812.

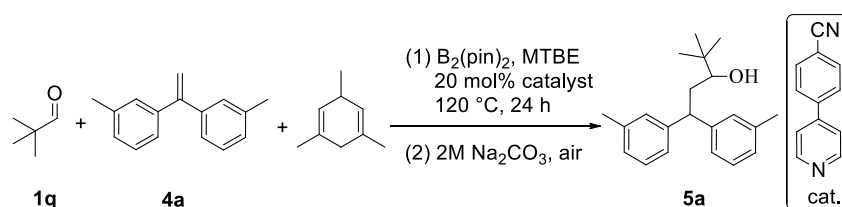

**5a:** Prepared following *general procedure* using **1q** (21.7  $\mu\text{L}$ , 0.2 mmol, 1.0 equiv), **4a** (83.3 mg, 0.4 mmol, 2.0 equiv),  $\text{B}_2(\text{pin})_2$  (50.8 mg), 1,3,5-trimethyl-1,4-cyclohexadiene (24.5 mg, 0.2 mmol, 1.0 equiv),

4-(4-pyridinyl)benzotrile (7.2 mg, 20 mol%) and MTBE (1 mL) at 120 °C. After 24 h, following the described step, the reaction mixture was isolated with prepared TLC on silica (PE/EA = 50:1) to afford the product **5a** (41 mg, 70% yield).

**5a**: Colorless oil;  $^1\text{H}$  NMR (400 MHz,  $\text{CDCl}_3$ )  $\delta$  7.22 – 7.04 (m, 6H), 7.02 – 6.94 (m, 2H), 4.19 (d,  $J$  = 11.4 Hz, 1H), 3.10 (d,  $J$  = 10.6 Hz, 1H), 2.36 – 2.28 (m, 7H), 1.92 – 1.82 (m, 1H), 1.40 (brs, 1H, -OH), 0.88 (d,  $J$  = 1.7 Hz, 9H);  $^{13}\text{C}$  NMR (100 MHz,  $\text{CDCl}_3$ )  $\delta$  146.0, 143.6, 138.0, 129.3, 128.5, 128.4, 127.0, 126.8, 125.0, 124.6, 77.35, 48.0, 37.6, 35.0, 25.6, 21.5; IR (film): 3461, 2955, 2868, 1604, 1478, 1363, 1067, 773; HRMS (ESI-TOF) exact mass calculated for  $\text{C}_{21}\text{H}_{32}\text{NO}$   $[\text{M}+\text{NH}_4]^+$  314.2478, found 314.2477.

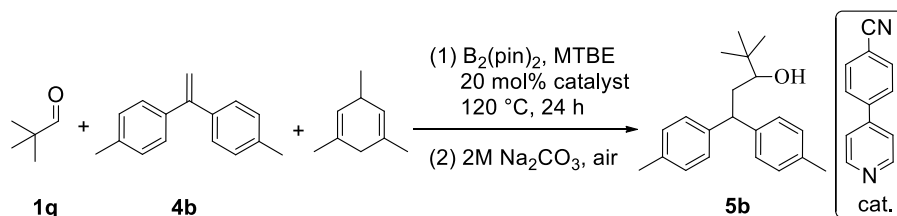

**5b**: Prepared following *general procedure* using **1q** (21.7  $\mu\text{L}$ , 0.2 mmol, 1.0 equiv), **4b** (83.3 mg, 0.4 mmol, 2.0 equiv),  $\text{B}_2(\text{pin})_2$  (50.8 mg), 1,3,5-trimethyl-1,4-cyclohexadiene (24.5 mg, 0.2 mmol, 1.0 equiv), 4-(4-pyridinyl)benzotrile (7.2 mg, 20 mol%) and MTBE (1 mL) at 120 °C. After 24 h, following the described step, the reaction mixture was isolated with prepared TLC on silica (PE/EA = 50:1) to afford the product **5b** (38 mg, 64% yield).

**5b**: Colorless oil;  $^1\text{H}$  NMR (400 MHz,  $\text{CDCl}_3$ )  $\delta$  7.21 – 7.08 (m, 8H), 4.22 (dd,  $J$  = 11.5, 4.3 Hz, 1H), 3.14 (d,  $J$  = 10.4 Hz, 1H), 2.35 – 2.30 (m, 7H), 1.96 – 1.86 (m, 1H), 1.44 (brs, 1H, with -OH), 0.90 (s, 9H);  $^{13}\text{C}$  NMR (100 MHz,  $\text{CDCl}_3$ )  $\delta$  143.3, 140.9, 135.7, 135.6, 129.3, 129.3, 128.1, 127.5, 77.4, 47.3, 37.7, 35.0, 25.7, 21.1, 21.0; IR (film): 3447, 2954, 2868, 1051, 1447, 1275, 1065, 764; HRMS (ESI-TOF) exact mass calculated for  $\text{C}_{21}\text{H}_{28}\text{NaO}$   $[\text{M}+\text{Na}]^+$  319.2032, found 319.2030.

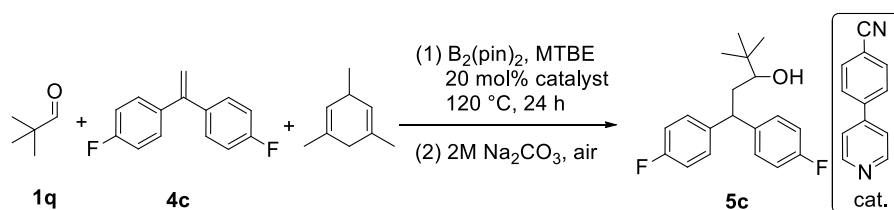

**5c**: Prepared following *general procedure* using **1q** (21.7  $\mu$ L, 0.2 mmol, 1.0 equiv), **4c** (86.49 mg, 0.4 mmol, 2.0 equiv),  $B_2(\text{pin})_2$  (50.8 mg), 1,3,5-trimethyl-1,4-cyclohexadiene (24.5 mg, 0.2 mmol, 1.0 equiv), 4-(4-pyridinyl)benzotrile (7.2 mg, 20 mol%) and MTBE (1 mL) at 120  $^\circ\text{C}$ . After 24 h, following the described step, the reaction mixture was isolated with prepared TLC on silica (PE/EA = 50:1) to afford the product **5c** (27 mg, 41% yield).

**5c**: Colorless oil;  $^1\text{H}$  NMR (400 MHz,  $\text{CDCl}_3$ )  $\delta$  7.24 – 7.15 (m, 4H), 7.03 – 6.91 (m, 4H), 4.27 (dd,  $J = 11.8, 3.9$  Hz, 1H), 3.03 (dd,  $J = 10.8, 1.7$  Hz, 1H), 2.28 – 2.18 (m, 1H), 1.92 – 1.83 (m, 1H), 1.59 (brs, 1H, -OH), 0.87 (s, 9H);  $^{13}\text{C}$  NMR (100 MHz,  $\text{CDCl}_3$ )  $\delta$  162.7 (d,  $J_{\text{C-F}} = 18.4$  Hz), 160.3 (d,  $J_{\text{C-F}} = 18.3$  Hz), 141.6 (d,  $J_{\text{C-F}} = 3.2$  Hz), 139.5 (d,  $J_{\text{C-F}} = 3.3$  Hz), 129.7 (d,  $J_{\text{C-F}} = 7.9$  Hz), 129.0 (d,  $J_{\text{C-F}} = 7.8$  Hz), 115.5 (d,  $J_{\text{C-F}} = 21.4$  Hz), 115.3 (d,  $J_{\text{C-F}} = 21.3$  Hz), 77.1, 46.4, 37.8, 35.0, 25.7;  $^{19}\text{F}$  NMR (376 MHz,  $\text{CDCl}_3$ )  $\delta$  -116.69, -117.17; IR (film): 3612, 3480, 2957, 2870, 1603, 1505, 1224, 1033, 747; HRMS (ESI-TOF) exact mass calculated for  $\text{C}_{19}\text{H}_{22}\text{F}_2\text{NaO}$  [ $\text{M}+\text{Na}$ ] $^+$  327.1531, found 327.1532.

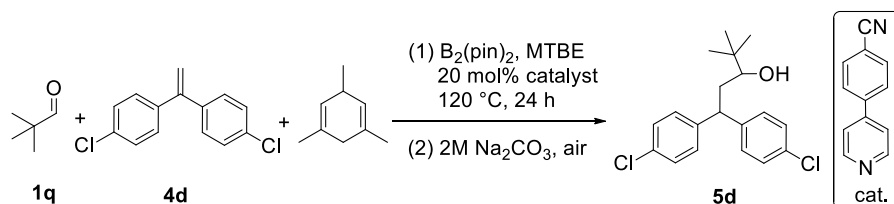

**5d**: Prepared following *general procedure* using **1q** (21.7  $\mu$ L, 0.2 mmol, 1.0 equiv), **4d** (99.66 mg, 0.4 mmol, 2.0 equiv),  $B_2(\text{pin})_2$  (50.8 mg), 1,3,5-trimethyl-1,4-cyclohexadiene (24.5 mg, 0.2 mmol, 1.0 equiv), 4-(4-pyridinyl)benzotrile (7.2 mg, 20 mol%) and MTBE (1 mL) at 120  $^\circ\text{C}$ . After 24 h, following the described step, the reaction mixture was isolated with prepared TLC on silica (PE/EA = 50:1) to afford the product **5d** (41 mg, 61% yield).

**5d**: Colorless oil;  $^1\text{H}$  NMR (400 MHz,  $\text{CDCl}_3$ )  $\delta$  7.28 – 7.19 (m, 4H), 7.18 – 7.12 (m, 4H), 4.25 (dd,  $J = 11.9, 3.8$  Hz, 1H), 3.01 (dd,  $J = 10.7, 1.7$  Hz, 1H), 2.27 – 2.17 (m, 1H), 1.90 – 1.81 (m, 1H), 1.44 (brs, 1H, OH), 0.86 (s, 9H);  $^{13}\text{C}$  NMR (100 MHz,  $\text{CDCl}_3$ )  $\delta$  144.0, 141.9, 132.3, 132.0, 129.6, 129.0, 128.9, 128.7, 77.0, 46.6, 37.2 ,

35.0, 25.7; IR (film): 3480, 2958, 2869, 1490, 1405, 1364, 1091, 1013, 814; HRMS (ESI-TOF) exact mass calculated for C<sub>19</sub>H<sub>20</sub>Cl<sub>2</sub>O [M-H]<sup>-</sup> 335.0975, found 335.0937.

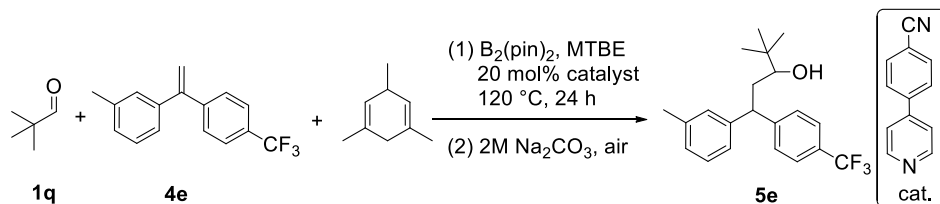

**5e:** Prepared following *general procedure* using **1q** (21.7  $\mu$ L, 0.2 mmol, 1.0 equiv), **4e** (104.9 mg, 0.4 mmol, 2.0 equiv), B<sub>2</sub>(pin)<sub>2</sub> (50.8 mg), 1,3,5-trimethyl-1,4-cyclohexadiene (24.5 mg, 0.2 mmol, 1.0 equiv), 4-(4-pyridinyl)benzonitrile (7.2 mg, 20 mol%) and MTBE (1 mL) at 120 °C. After 24 h, following the described step, the reaction mixture was isolated with prepared TLC on silica (PE/EA = 50:1) to afford the product **5e** (50 mg, 72% yield, d. r. = 1:1.5). The diastereoselectivities (d. r.) was determined by <sup>1</sup>H NMR analysis of the crude mixture. The two diastereomers were not separated by preparative TLC. Reported as a mixture of diastereomers.

**5e:** Colorless oil; <sup>1</sup>H NMR (400 MHz, CDCl<sub>3</sub>)  $\delta$  7.60 – 7.36 (m, 4H), 7.27 – 7.00 (m, 4H), 4.38 – 4.32 (m, 1H), 3.15 – 3.02 (m, 1H), 2.41 – 2.32 (m, 4H), 2.00 – 1.85 (m, 1H), 1.62 (brs, 1H, -OH), 0.90 (d,  $J$  = 1.1 Hz, 9H); <sup>13</sup>C NMR (100 MHz, CDCl<sub>3</sub>)  $\delta$  150.3, 148.2, 144.9, 142.6, 138.44 (d,  $J_{C-F}$  = 7.5 Hz), 129.4, 128.7, 128.5, 128.0, 127.5, 127.3, 125.56 (dd,  $J_{C-F}$  = 15.4, 3.9 Hz), 125.2, 124.6, 77.2, 77.0, 47.8, 37.3, 37.2, 35.1, 25.7, 21.6, 21.6; <sup>19</sup>F NMR (376 MHz, CDCl<sub>3</sub>)  $\delta$  -62.28 (d,  $J$  = 4.8 Hz). IR (film): 3473, 2959, 2870, 1618, 1417, 1395, 1325, 1164, 1017, 721; HRMS (APCI-TOF) exact mass calculated for C<sub>21</sub>H<sub>24</sub>O [M-H]<sup>-</sup> 349.1785, found 349.1785.

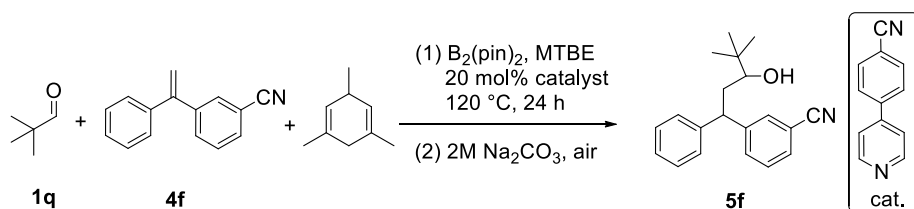

**5f:** Prepared following *general procedure* using **1q** (21.7  $\mu$ L, 0.2 mmol, 1.0 equiv), **4f** (82.1 mg, 0.4 mmol, 2.0 equiv), B<sub>2</sub>(pin)<sub>2</sub> (50.8 mg),

1,3,5-trimethyl-1,4-cyclohexadiene (24.5 mg, 0.2 mmol, 1.0 equiv), 4-(4-pyridinyl)benzotrile (7.2 mg, 20 mol%) and MTBE (1 mL) at 120 °C. After 24 h, following the described step, the reaction mixture was isolated with prepared TLC on silica (PE/EA = 10:1) to afford the product **5f** (27 mg, 46% yield, d. r. = 1:1.5). The diastereoselectivities (d. r.) was determined by <sup>1</sup>H NMR analysis of the crude mixture. The two diastereomers were not separated by preparative TLC. Reported as a mixture of diastereomers.

**5f**: Colorless oil; <sup>1</sup>H NMR (400 MHz, CDCl<sub>3</sub>) δ 7.54 – 7.43 (m, 3H), 7.37 – 7.31 (m, 3H), 7.27 – 7.22 (m, 3H), 4.34 (dd, *J* = 11.9, 3.7 Hz, 1H), 3.06 (dd, *J* = 10.8, 1.6 Hz, 1H), 2.35 – 2.26 (m, 1H), 1.91 – 1.83 (m, 1H), 1.60 (brs, 1H, -OH), 0.88 (s, 9H); <sup>13</sup>C NMR (100 MHz, CDCl<sub>3</sub>) δ 147.7, 142.4, 132.5, 131.3, 129.9, 129.3, 129.0, 128.4, 127.0, 119.1, 112.5, 76.9, 47.5, 37.1, 35.0, 25.7; IR (film): 3523, 2956, 2869, 2229, 1494, 1480, 1009, 719; HRMS (ESI-TOF) exact mass calculated for C<sub>20</sub>H<sub>23</sub>NaNO [M+Na]<sup>+</sup> 316.1672, found 316.1671.

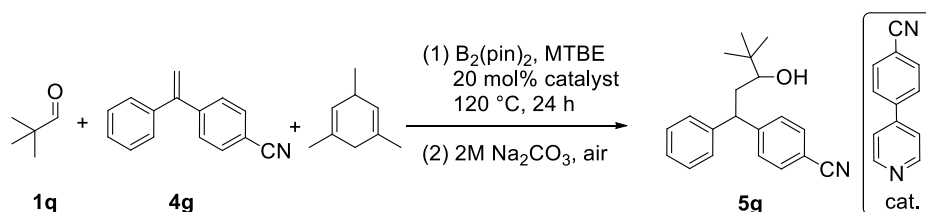

**5g**: Prepared following *general procedure* using **1q** (21.7 μL, 0.2 mmol, 1.0 equiv), **4g** (82.1 mg, 0.4 mmol, 2.0 equiv), B<sub>2</sub>(pin)<sub>2</sub> (50.8 mg), 1,3,5-trimethyl-1,4-cyclohexadiene (24.5 mg, 0.2 mmol, 1.0 equiv), 4-(4-pyridinyl)benzotrile (7.2 mg, 20 mol%) and MTBE (1 mL) at 120 °C. After 24 h, following the described step, the reaction mixture was isolated with prepared TLC on silica (PE/EA = 10:1) to afford the product **5g** (28 mg, 48% yield, d. r. = 1:1.1). The diastereoselectivities (d. r.) was determined by <sup>1</sup>H NMR analysis of the crude mixture. The two diastereomers were not separated by preparative TLC. Reported as a mixture of diastereomers.

**5g**: Colorless oil; <sup>1</sup>H NMR (400 MHz, CDCl<sub>3</sub>) δ 7.62 – 7.52 (m, 2H), 7.41 – 7.20 (m, 7H), 4.41 – 4.33 (m, 1H), 3.07 and 2.98 (dd, *J* = 10.7, 1.6 Hz, 0.46 H, dd, *J* = 10.8, 1.7 Hz, 0.54 H), 2.36 – 2.27 (m, 1H), 2.00 – 2.83 (m, 1H), 1.64 (brs, 1H, -OH), 0.88

(s, 9H);  $^{13}\text{C}$  NMR (100 MHz,  $\text{CDCl}_3$ )  $\delta$  151.7, 149.8, 144.4, 142.3, 132.5, 132.3, 129.2, 128.9, 128.8, 128.6, 128.4, 127.7, 127.0, 126.7, 119.1, 119.0, 110.3, 109.9, 76.9, 48.0, 37.1, 37.0, 35.1, 35.0, 25.7, 25.6; IR (film): 3501, 2957, 2869, 2228, 1606, 1479, 1275, 1031, 764; HRMS (ESI-TOF) exact mass calculated for  $\text{C}_{20}\text{H}_{23}\text{NaNO}$   $[\text{M}+\text{Na}]^+$  316.1672, found 316.1672.

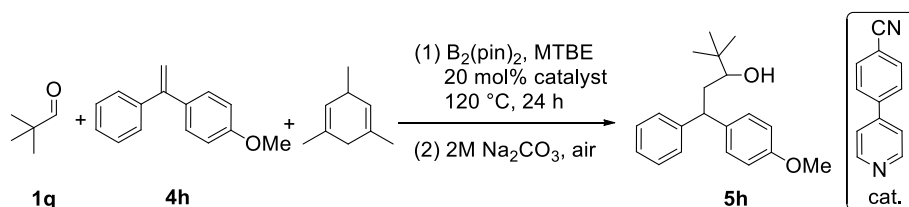

**5h**: Prepared following *general procedure* using **1q** (21.7  $\mu\text{L}$ , 0.2 mmol, 1.0 equiv), **4h** (84.1 mg, 0.4 mmol, 2.0 equiv),  $\text{B}_2(\text{pin})_2$  (50.8 mg), 1,3,5-trimethyl-1,4-cyclohexadiene (24.5 mg, 0.2 mmol, 1.0 equiv), 4-(4-pyridinyl)benzonitrile (7.2 mg, 20 mol%) and MTBE (1 mL) at 120  $^\circ\text{C}$ . After 24 h, following the described step, the reaction mixture was isolated with prepared TLC on silica (PE/EA = 50:1) to afford the product **5h** (31 mg, 52% yield, d. r. = 1:1). The diastereoselectivities (d. r.) was determined by  $^1\text{H}$  NMR analysis of the crude mixture. The two diastereomers were not separated by preparative TLC. Reported as a mixture of diastereomers.

**5h**: Colorless oil;  $^1\text{H}$  NMR (400 MHz,  $\text{CDCl}_3$ )  $\delta$  7.32 – 7.16 (m, 7H), 6.89 – 6.81 (m, 2H), 4.29 – 4.22 (m, 1H), 3.79 and 3.77 (s, 1.55H, s, 1.45H), 3.14 – 3.07 (m, 1H), 2.38 – 2.27 (m, 1H), 1.96 – 1.87 (m, 1H), 1.62 (brs, 1H), 0.89 (d,  $J = 1.4$  Hz, 9H);  $^{13}\text{C}$  NMR (100 MHz,  $\text{CDCl}_3$ )  $\delta$  158.0, 157.9, 146.4, 144.2, 138.2, 135.8, 129.2, 128.6, 128.5, 128.2, 127.6, 126.3, 126.0, 114.0, 113.9, 77.3, 77.2, 55.2, 47.2, 47.1, 37.7, 35.0, 25.7; IR (film): 3479, 2954, 2869, 1609, 1494, 1247, 1177, 1034, 829; HRMS (ESI-TOF) exact mass calculated for  $\text{C}_{20}\text{H}_{26}\text{NaO}_2$   $[\text{M}+\text{Na}]^+$  321.1825, found 321.1827.



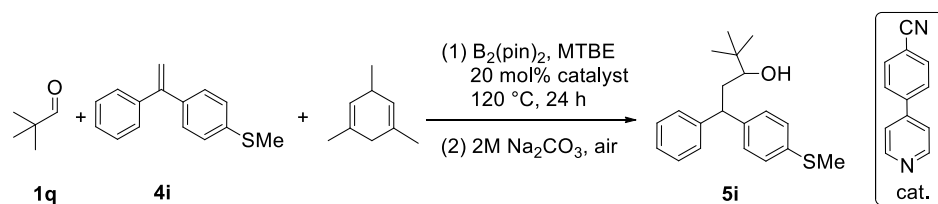

**5i:** Prepared following *general procedure* using **1q** (21.7  $\mu$ L, 0.2 mmol, 1.0 equiv), **4i** (90.5 mg, 0.4 mmol, 2.0 equiv),  $B_2(\text{pin})_2$  (50.8 mg), 1,3,5-trimethyl-1,4-cyclohexadiene (24.5 mg, 0.2 mmol, 1.0 equiv), 4-(4-pyridinyl)benzonitrile (7.2 mg, 20 mol%) and MTBE (1 mL) at 120  $^\circ\text{C}$ . After 24 h, following the described step, the reaction mixture was isolated with prepared TLC on silica (PE/EA = 50:1) to afford the product **5i** (36 mg, 58% yield, d. r. = 1:1.2). The diastereoselectivities (d. r.) was determined by  $^1\text{H}$  NMR analysis of the crude mixture. The two diastereomers were not separated by preparative TLC. Reported as a mixture of diastereomers.

**5i:** Colorless oil;  $^1\text{H}$  NMR (400 MHz,  $\text{CDCl}_3$ )  $\delta$  7.31 – 7.24 (m, 4H), 7.22 – 7.14 (m, 5H), 4.28 – 4.22 (m, 1H), 3.11 – 3.06 (m, 1H), 2.45 and 2.42 (s, 1.66H, s, 1.34H), 2.36 – 2.27 (m, 1H), 1.95 – 1.85 (m, 1H), 1.59 (brs, 1H, -OH), 0.88 (br. s, 9H);  $^{13}\text{C}$  NMR (100 MHz,  $\text{CDCl}_3$ )  $\delta$  145.9, 143.7, 143.2, 140.8, 136.0, 135.7, 128.9, 128.6, 128.5, 128.3, 128.2, 127.7, 127.2, 127.1, 126.4, 126.2, 77.2, 77.2, 47.5, 47.5, 37.5, 35.0, 25.7, 16.2, 16.0; IR (film): 3462, 3025, 2955, 2868, 1600, 1492, 1478, 1008, 762; HRMS (APCI-TOF) exact mass calculated for  $\text{C}_{20}\text{H}_{25}\text{O}$   $[\text{M}-\text{H}]^-$  313.1632, found 313.1634.

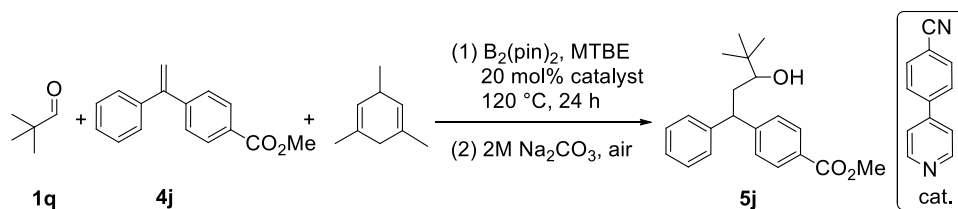

**5j:** Prepared following *general procedure* using **1q** (21.7  $\mu$ L, 0.2 mmol, 1.0 equiv), **4j** (95.3 mg, 0.4 mmol, 2.0 equiv),  $B_2(\text{pin})_2$  (50.8 mg), 1,3,5-trimethyl-1,4-cyclohexadiene (24.5 mg, 0.2 mmol, 1.0 equiv), 4-(4-pyridinyl)benzonitrile (7.2 mg, 20 mol%) and MTBE (1 mL) at 120  $^\circ\text{C}$ . After 24

h, following the described step, the reaction mixture was isolated with prepared TLC on silica (PE/EA = 50:1) to afford the product **5j** (26 mg, 40% yield, d. r. = 1:1.1). The diastereoselectivities (d. r.) was determined by <sup>1</sup>H NMR analysis of the crude mixture. The two diastereomers were not separated by preparative TLC. Reported as a mixture of diastereomers.

**5j**: Colorless oil; <sup>1</sup>H NMR (400 MHz, CDCl<sub>3</sub>) δ 8.00 – 7.90 (m, 2H), 7.37 – 7.17 (m, 7H), 4.38 – 4.33 (m, 1H), 3.89 and 3.88 (s, 2.16H, s, 0.85H), 3.10 – 2.99 (m, 1H), 2.39 – 2.29 (m, 1H), 1.99 – 1.86 (m, 1H), 1.61 (brs, 1H, -OH), 0.87 (d, *J* = 3.5 Hz, 9H); <sup>13</sup>C NMR (100 MHz, CDCl<sub>3</sub>) δ 167.1, 151.5, 149.4, 145.1, 143.0, 130.0, 129.9, 128.8, 128.7, 128.5, 128.4, 128.4, 127.8, 127.7, 126.7, 126.5, 77.2, 52.1, 52.1, 48.0, 37.3, 37.2, 35.1, 25.7, 25.7; IR (film): 3565, 2953, 1722, 1609, 1435, 1278, 1111, 1019, 756; HRMS (ESI-TOF) exact mass calculated for C<sub>21</sub>H<sub>26</sub>NaO<sub>3</sub> [M+Na]<sup>+</sup> 349.1774, found 349.1775.

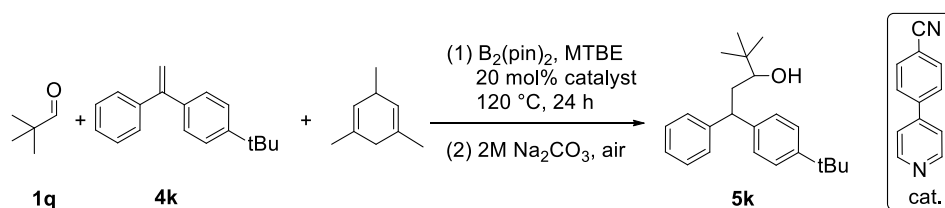

**5k**: Prepared following *general procedure* using **1q** (21.7 μL, 0.2 mmol, 1.0 equiv), **4k** (94.5 mg, 0.4 mmol, 2.0 equiv), B<sub>2</sub>(pin)<sub>2</sub> (50.8 mg), 1,3,5-trimethyl-1,4-cyclohexadiene (24.5 mg, 0.2 mmol, 1.0 equiv), 4-(4-pyridinyl)benzotrile (7.2 mg, 20 mol%) and MTBE (1 mL) at 120 °C. After 24 h, following the described step, the reaction mixture was isolated with prepared TLC on silica (PE/EA = 50:1) to afford the product **5k** (26 mg, 40% yield, d. r. = 1:0.8). The diastereoselectivities (d. r.) was determined by <sup>1</sup>H NMR analysis of the crude mixture. The two diastereomers were not separated by preparative TLC. Reported as a mixture of diastereomers.

**5k**: Colorless oil; <sup>1</sup>H NMR (400 MHz, CDCl<sub>3</sub>) δ 7.39 – 7.19 (m, 9H), 4.35 – 4.28 (m, 1H), 3.21 and 3.16 (dd, *J* = 10.5, 1.6 Hz, 0.55H, dd, *J* = 10.6, 1.6 Hz, 0.44H), 2.47 – 2.37 (m, 1H), 2.04 – 1.92 (m, 1H), 1.67 (brs, 1H), 1.36 (d, *J* = 6.4 Hz, 9H), 0.94 (d, *J* = 4.4 Hz, 9H); <sup>13</sup>C NMR (100 MHz, CDCl<sub>3</sub>) δ 149.0, 148.8, 146.4, 144.0, 142.9,

140.6, 128.6, 128.5, 128.4, 127.8, 127.8, 127.8, 126.3, 126.0, 125.5, 125.4, 77.4, 77.3, 47.8, 47.7, 37.8, 34.1, 35.1, 35.0, 34.4, 34.4, 31.5, 31.5, 25.8, 25.7; IR (film): 3447, 2960, 2904, 1477, 1363, 1286, 1030, 700; HRMS (ESI-TOF) exact mass calculated for  $C_{23}H_{36}NO$   $[M+NH_4]^+$  342.2791, found 342.2786.

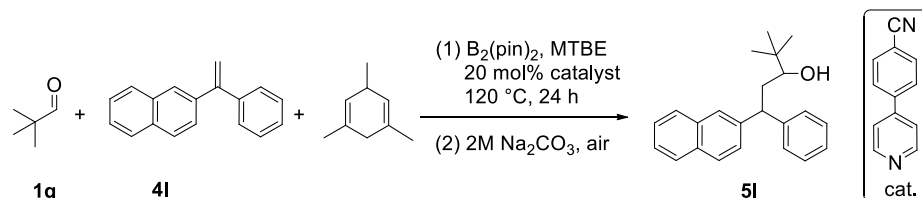

**5l**: Prepared following *general procedure* using **1q** (21.7  $\mu$ L, 0.2 mmol, 1.0 equiv), **4l** (92.1 mg, 0.4 mmol, 2.0 equiv),  $B_2(\text{pin})_2$  (50.8 mg), 1,3,5-trimethyl-1,4-cyclohexadiene (24.5 mg, 0.2 mmol, 1.0 equiv), 4-(4-pyridinyl)benzonitrile (7.2 mg, 20 mol%) and MTBE (1 mL) at 120 °C. After 24 h, following the described step, the reaction mixture was isolated with prepared TLC on silica (PE/EA = 50:1) to afford the product **5l** (48 mg, 76% yield, d. r. = 1:1.1). The diastereoselectivities (d. r.) was determined by GC-MS analysis of the crude mixture. The two diastereomers were not separated by preparative TLC. Reported as a mixture of diastereomers.

**5l**: Colorless oil;  $^1\text{H}$  NMR (400 MHz,  $\text{CDCl}_3$ )  $\delta$  7.84 – 7.71 (m, 4H), 7.47 – 7.15 (m, 8H), 4.53 – 4.43 (m, 1H), 3.20 – 3.10 (m, 1H), 2.54 – 2.41 (m, 1H), 2.09 – 2.96 (dm, 1H), 1.58 (brs, 1H), 0.90 (dd,  $J = 8.8, 3.3$  Hz, 9H);  $^{13}\text{C}$  NMR (100 MHz,  $\text{CDCl}_3$ )  $\delta$  145.8, 143.7, 143.5, 141.3, 133.6, 132.3, 132.1, 128.7, 128.6, 128.5, 128.4, 128.1, 127.8, 127.8, 127.7, 127.6, 126.9, 126.8, 126.8, 126.4, 126.2, 126.1, 126.0, 125.5, 125.4, 125.4, 77.3, 77.2, 48.1, 48.0, 37.3, 37.3, 35.1, 25.7; HRMS (ESI-TOF) exact mass calculated for  $C_{23}H_{26}NaO$   $[M+Na]^+$  341.1876, found 341.1876.

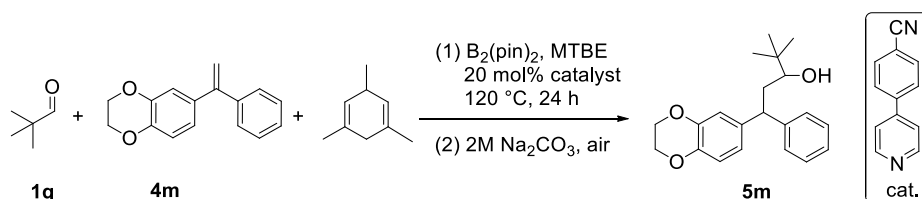

**5m**: Prepared following *general procedure* using **1q** (21.7  $\mu$ L, 0.2 mmol, 1.0 equiv), **4m** (92.1 mg, 0.4 mmol, 2.0 equiv),  $B_2(\text{pin})_2$  (50.8 mg), 1,3,5-trimethyl-1,4-cyclohexadiene (24.5 mg, 0.2 mmol, 1.0 equiv),

4-(4-pyridinyl)benzotrile (7.2 mg, 20 mol%) and MTBE (1 mL) at 120 °C. After 24 h, following the described step, the reaction mixture was isolated with prepared TLC on silica (PE/EA = 50:1) to afford the product **5m** (44 mg, 68% yield, d. r. = 1:1.2). The diastereoselectivities (d. r.) was determined by <sup>1</sup>H NMR analysis of the crude mixture. The two diastereomers were not separated by preparative TLC. Reported as a mixture of diastereomers.

**5m**: Colorless oil; <sup>1</sup>H NMR (400 MHz, CDCl<sub>3</sub>) δ 7.30 – 7.25 (m, 4H), 7.21 – 7.12 (m, 1H), 6.80 – 6.72 (m, 3H), 4.26 – 4.13 (m, 5H), 3.14 and 3.06 (dd, *J* = 10.6, 1.6 Hz, 0.55H, dd, *J* = 10.6, 1.6 Hz, 0.45H), 2.32 – 2.22 (m, 1H), 1.91 – 1.81 (m, 1H), 1.39 (brs, 1H, with -OH), 0.88 (d, *J* = 7.1 Hz, 9H); <sup>13</sup>C NMR (100 MHz, CDCl<sub>3</sub>) δ 146.1, 143.9, 143.4, 143.2, 139.4, 137.1, 128.5, 128.4, 128.1, 127.5, 126.2, 126.0, 121.1, 120.6, 117.2, 117.1, 116.8, 116.2, 121.1, 120.6, 77.2, 64.4, 64.3, 64.2, 47.3, 37.5, 37.5, 34.9, 34.9, 25.6, 25.6; IR (film): 3501, 2955, 2871, 1732, 1589, 1505, 1284, 1036, 763; HRMS (ESI-TOF) exact mass calculated for C<sub>21</sub>H<sub>25</sub>O [M-H]<sup>-</sup> 325.1809, found 325.1806.

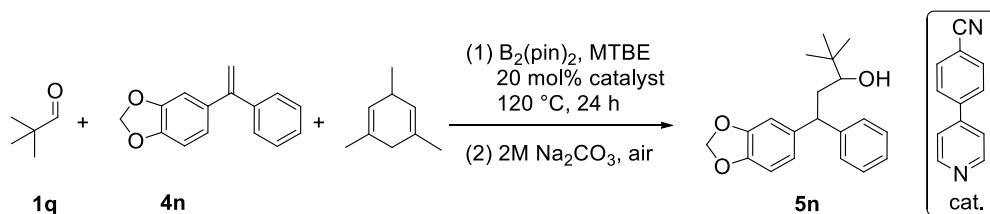

**5n**: Prepared following *general procedure* using **1q** (21.7 μL, 0.2 mmol, 1.0 equiv), **4n** (89.7 mg, 0.4 mmol, 2.0 equiv), B<sub>2</sub>(pin)<sub>2</sub> (50.8 mg), 1,3,5-trimethyl-1,4-cyclohexadiene (24.5 mg, 0.2 mmol, 1.0 equiv), 4-(4-pyridinyl)benzotrile (7.2 mg, 20 mol%) and MTBE (1 mL) at 120 °C. After 24 h, following the described step, the reaction mixture was isolated with prepared TLC on silica (PE/EA = 50:1) to afford the product **5n** (42 mg, 68% yield, d. r. = 1: 1.1). The diastereoselectivities (d. r.) was determined by <sup>1</sup>H NMR analysis of the crude mixture. The two diastereomers were not separated by preparative TLC. Reported as a mixture of diastereomers.

**5n**: Colorless oil; <sup>1</sup>H NMR (400 MHz, CDCl<sub>3</sub>) δ 7.33 – 7.15 (m, 5H), 6.76 – 6.67 (m, 3H), 5.91 and 5.90 (d, *J* = 1.5 Hz, 0.51H, d, *J* = 1.4 Hz, 0.49H), 5.88 (s, 1H), 4.23

– 4.16 (m, 1H), 3.13 – 3.04 (m, 1H), 2.33 – 2.21 (m, 1H), 1.91 – 1.83 (m, 1H), 1.44 (brs, 1H, with -OH), 0.87 (d,  $J = 4.6$  Hz, 9H);  $^{13}\text{C}$  NMR (100 MHz,  $\text{CDCl}_3$ )  $\delta$  147.8, 147.6, 146.0, 145.7, 143.8, 140.0, 137.7, 128.6, 128.5, 128.1, 127.5, 126.3, 126.1, 121.2, 120.3, 108.4, 108.2, 108.1, 100.8, 77.2, 77.1, 47.7, 47.5, 37.5, 37.4, 34.9, 25.6, 25.6; HRMS (ESI-TOF) exact mass calculated for  $\text{C}_{20}\text{H}_{24}\text{NaO}_3$   $[\text{M}+\text{Na}]^+$  335.1618, found 335.1625.

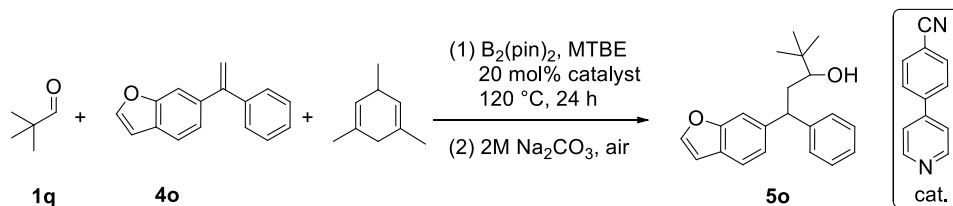

**5o**: Prepared following *general procedure* using **1q** (21.7  $\mu\text{L}$ , 0.2 mmol, 1.0 equiv), **4o** (89.7 mg, 0.4 mmol, 2.0 equiv),  $\text{B}_2(\text{pin})_2$  (50.8 mg), 1,3,5-trimethyl-1,4-cyclohexadiene (24.5 mg, 0.2 mmol, 1.0 equiv), 4-(4-pyridinyl)benzonitrile (7.2 mg, 20 mol%) and MTBE (1 mL) at 120  $^\circ\text{C}$ . After 24 h, following the described step, the reaction mixture was isolated with prepared TLC on silica (PE/EA = 50:1) to afford the product **5o** (21 mg, 34% yield, d. r. = 1:1.2). The diastereoselectivities (d. r.) was determined by  $^1\text{H}$  NMR analysis of the crude mixture. The two diastereomers were not separated by preparative TLC. Reported as a mixture of diastereomers.

**5o**: Colorless oil;  $^1\text{H}$  NMR (400 MHz,  $\text{CDCl}_3$ )  $\delta$  7.61 – 7.49 (m, 2H), 7.46 – 7.39 (m, 1H), 7.35 – 7.19 (m, 6H), 6.73 and 6.71 (dd,  $J = 2.2, 0.9$  Hz, 0.45H, dd,  $J = 2.2, 1.0$  Hz, 0.55H), 4.44 – 4.37 (m, 1H), 3.18 – 3.08 (m, 1H), 2.46 – 2.35 (m, 1H), 2.03 – 1.94 (m, 1H), 1.56 (brs, 1H, with -OH), 0.90 (d,  $J = 5.5$  Hz, 9H);  $^{13}\text{C}$  NMR (100 MHz,  $\text{CDCl}_3$ )  $\delta$  153.9, 153.7, 146.4, 145.3, 145.3, 144.3, 140.8, 138.5, 128.7, 128.5, 128.3, 127.7, 127.6, 126.3, 126.1, 124.8, 124.5, 120.7, 119.7, 111.4, 111.3, 106.7, 106.7, 77.3, 48.0, 47.9, 38.1, 37.9, 35.1, 35.0, 25.8; IR (film): 3565, 3461, 2956, 2867, 1503, 1439, 1245, 1040, 700; IR (film): 3561, 3481, 2955, 2868, 1466, 1261, 1125, 1031, 738; HRMS (ESI-TOF) exact mass calculated for  $\text{C}_{21}\text{H}_{24}\text{NaO}_2$   $[\text{M}+\text{Na}]^+$  331.1669, found 331.1671.

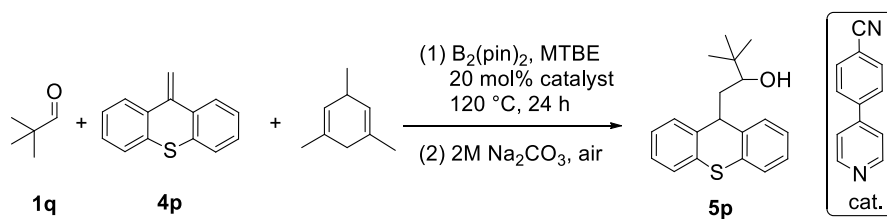

**5p**: Prepared following *general procedure* using **1q** (21.7  $\mu\text{L}$ , 0.2 mmol, 1.0 equiv), **4p** (84 mg, 0.4 mmol, 2.0 equiv),  $\text{B}_2(\text{pin})_2$  (50.8 mg), 1,3,5-trimethyl-1,4-cyclohexadiene (24.5 mg, 0.2 mmol, 1.0 equiv), 4-(4-pyridinyl)benzonitrile (7.2 mg, 20 mol%) and MTBE (1 mL) at 120  $^\circ\text{C}$ . After 24 h, following the described step, the reaction mixture was isolated with prepared TLC on silica (PE/EA = 50:1) to afford the product **5p** (15 mg, 25% yield).

**5p**: Colorless oil;  $^1\text{H NMR}$  (400 MHz,  $\text{CDCl}_3$ )  $\delta$  7.43 – 7.33 (m, 4H), 7.26 – 7.16 (m, 4H), 4.36 (dd,  $J = 11.4, 4.4$  Hz, 1H), 2.92 (dd,  $J = 10.8, 1.7$  Hz, 1H), 2.30 – 2.20 (m, 1H), 1.62 (brs, 1H, with -OH), 1.39 – 1.33 (m, 1H), 0.74 (s, 9H);  $^{13}\text{C NMR}$  (100 MHz,  $\text{CDCl}_3$ )  $\delta$  139.6, 137.1, 132.7, 132.4, 129.8, 128.4, 127.2, 127.1, 126.9, 126.6, 126.5, 126.3, 77.03, 46.2, 34.9, 33.5, 25.6; IR (film): 3566, 3481, 2956, 1464, 1441, 1276, 1063, 1007, 752; HRMS (ESI-TOF) exact mass calculated for  $\text{C}_{19}\text{H}_{22}\text{NaOS}$   $[\text{M}+\text{Na}]^+$  321.1284, found 321.1283.

## 5. NMR Spectra

$^1\text{H}$  NMR (400 MHz,  $\text{CDCl}_3$ ):

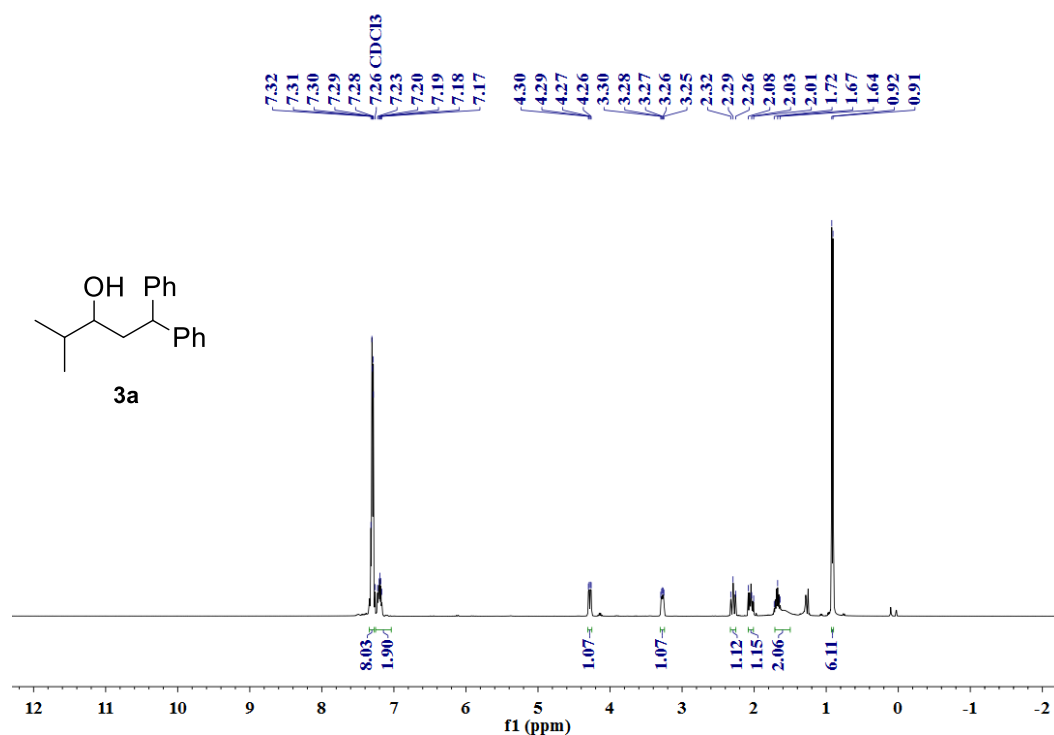

$^{13}\text{C}$  NMR (100 MHz,  $\text{CDCl}_3$ ):

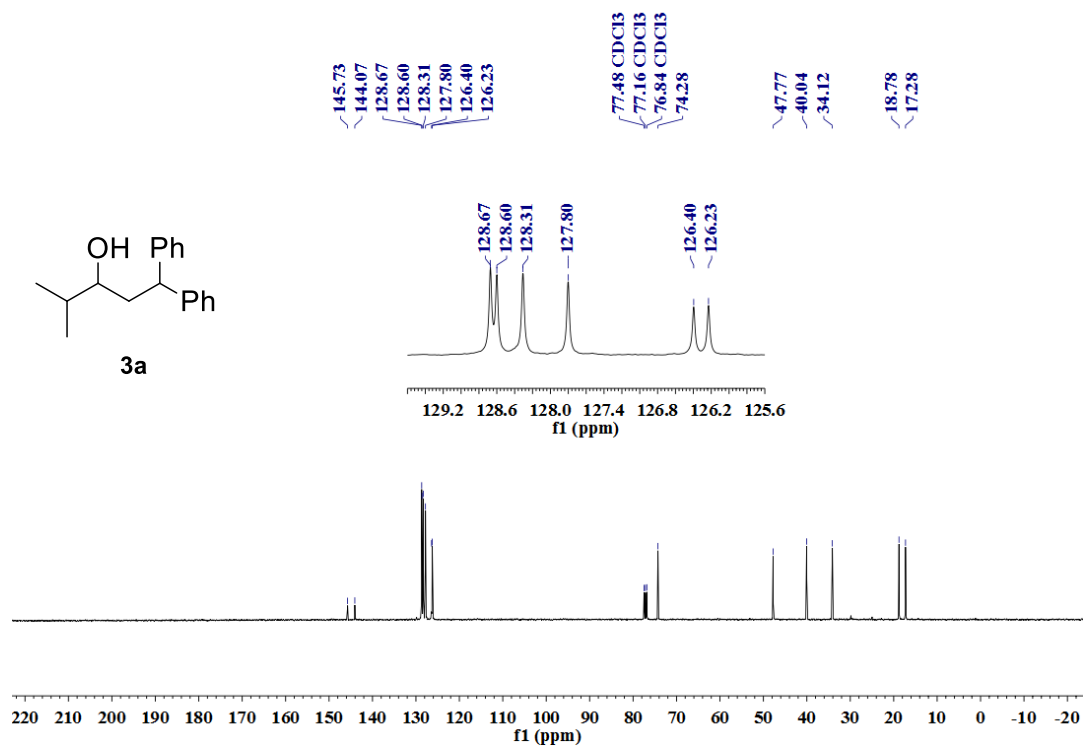

$^1\text{H}$  NMR (400 MHz,  $\text{CDCl}_3$ ):

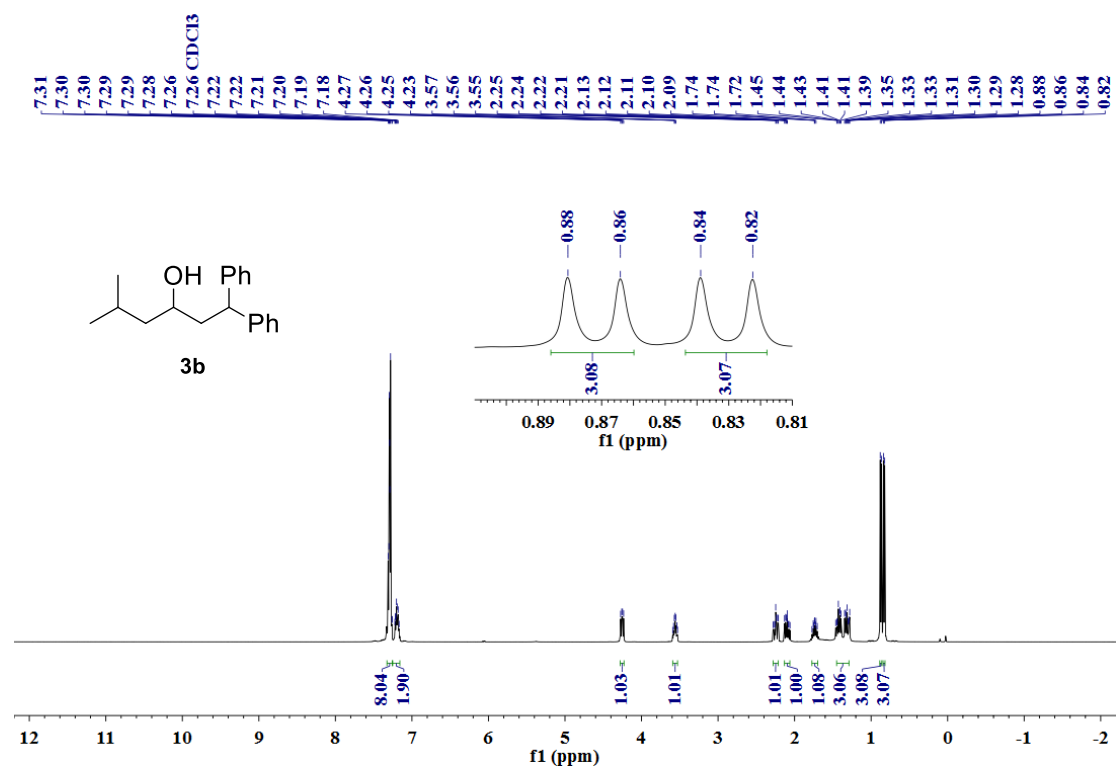

$^{13}\text{C}$  NMR (100 MHz,  $\text{CDCl}_3$ ):

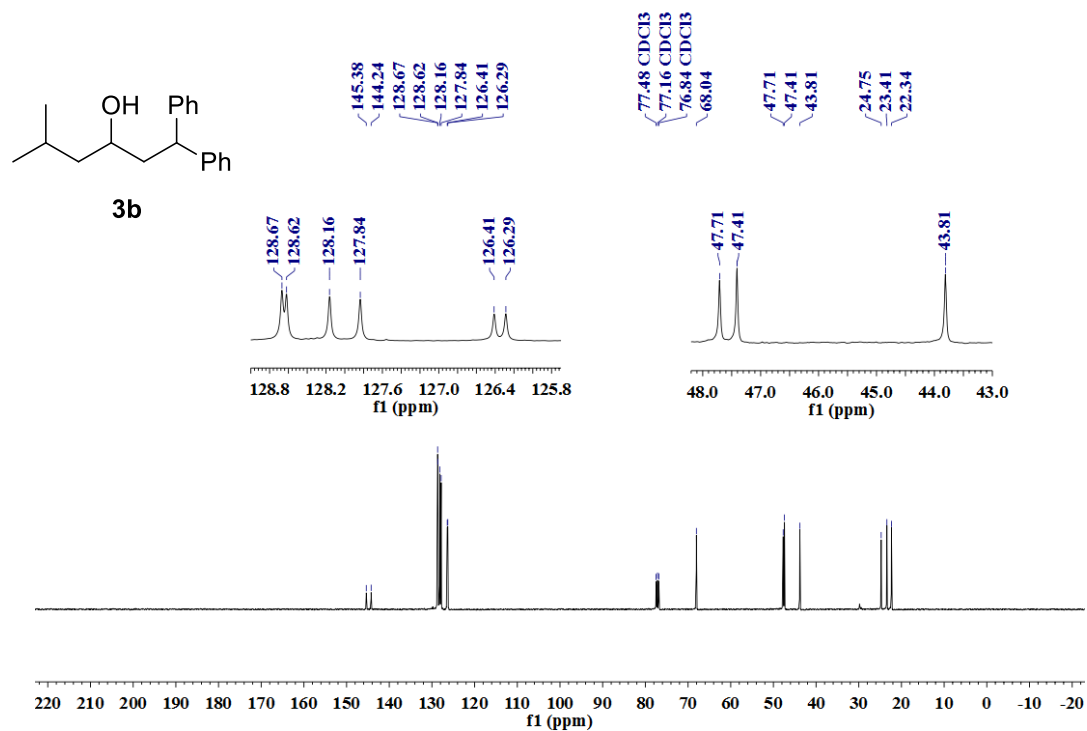



$^1\text{H}$  NMR (400 MHz,  $\text{CDCl}_3$ ):

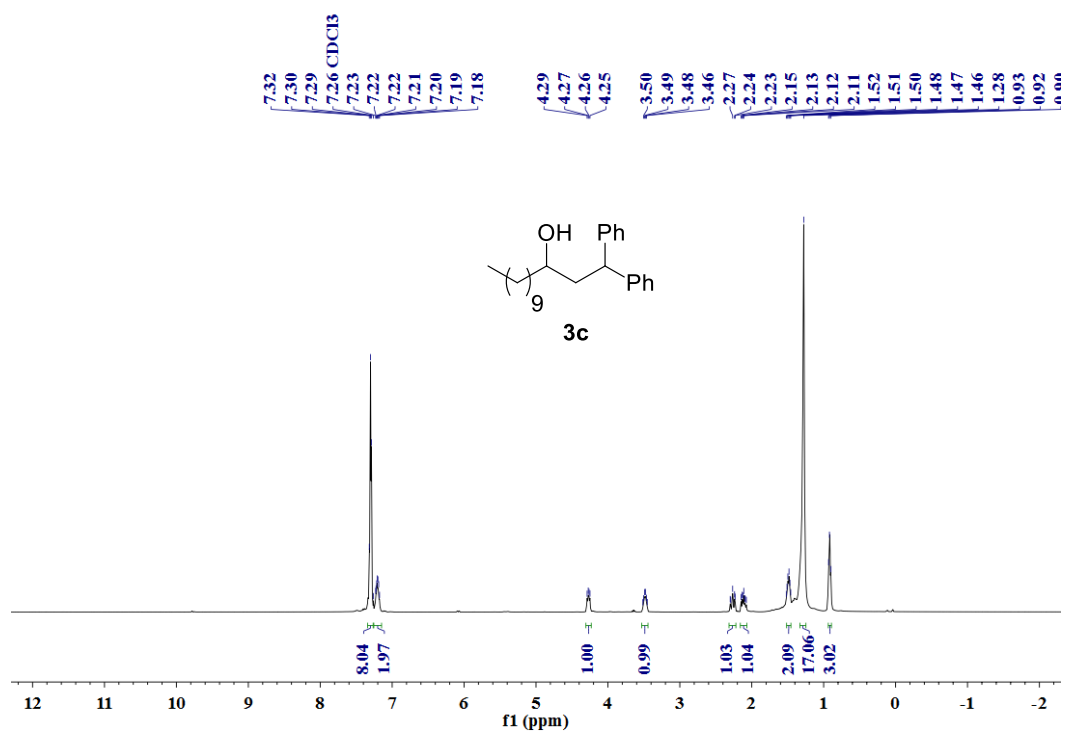

$^{13}\text{C}$  NMR (100 MHz,  $\text{CDCl}_3$ ):

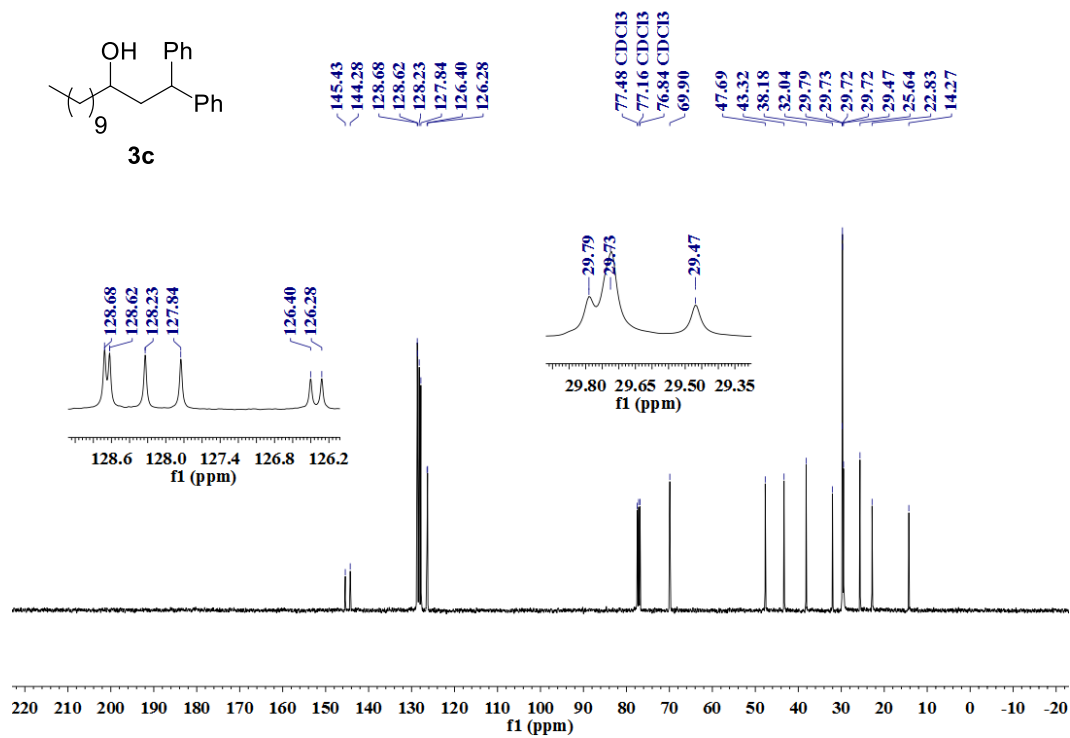

$^1\text{H}$  NMR (400 MHz,  $\text{CDCl}_3$ ):

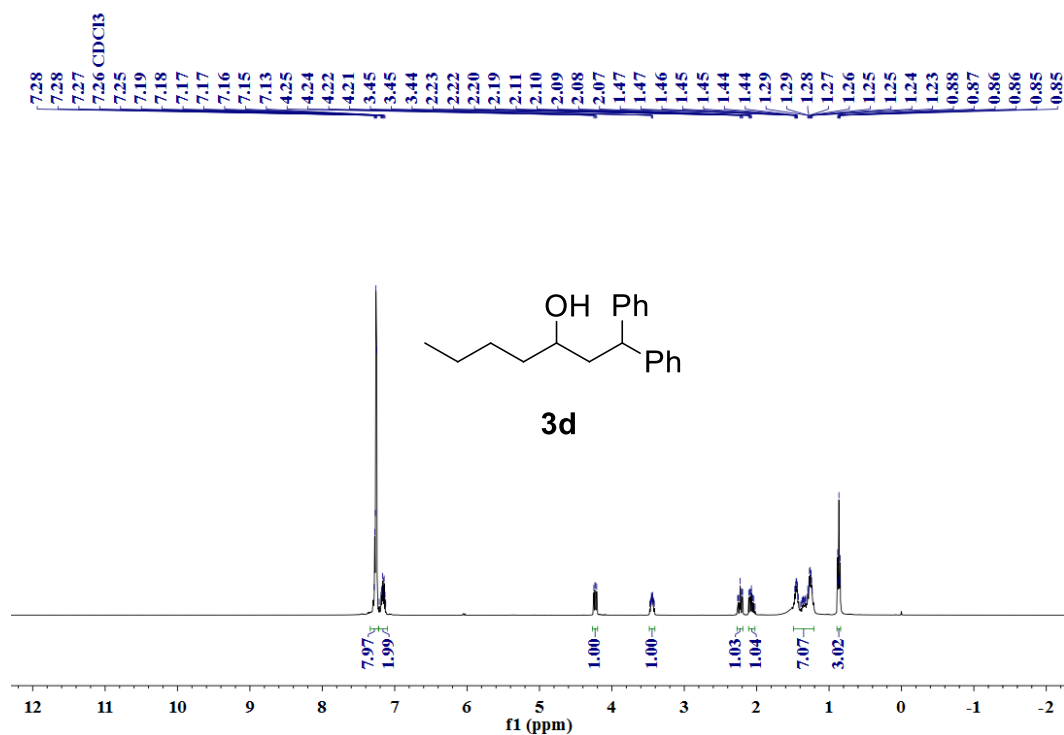

$^{13}\text{C}$  NMR (100 MHz,  $\text{CDCl}_3$ ):

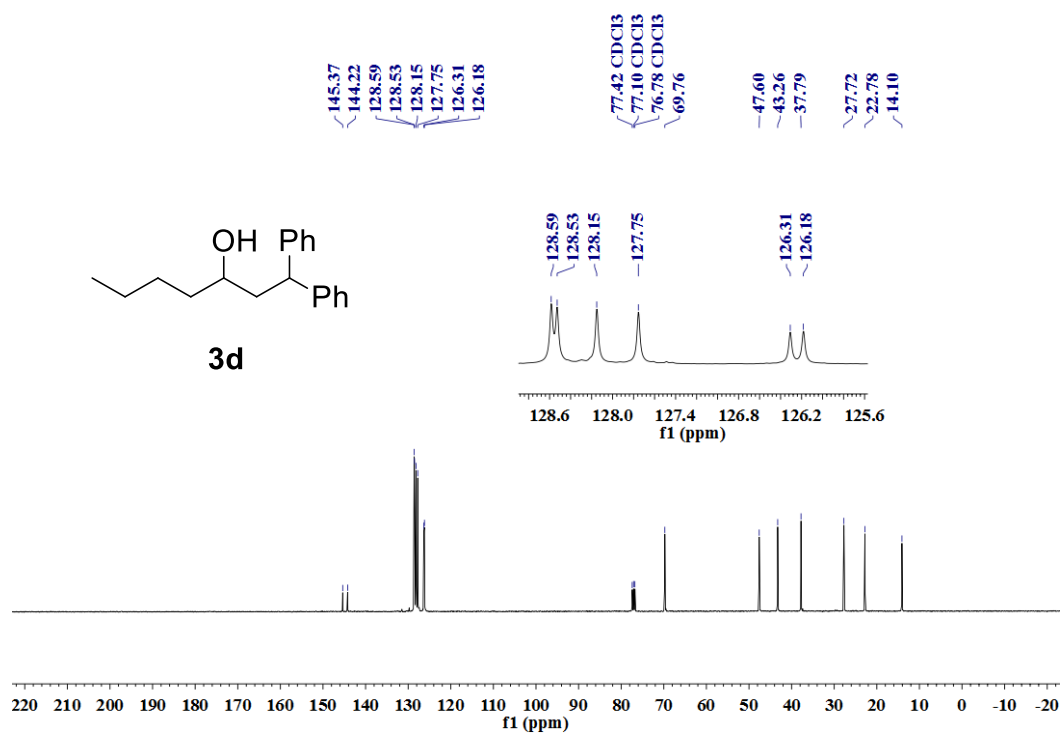

$^1\text{H}$  NMR (400 MHz,  $\text{CDCl}_3$ ):

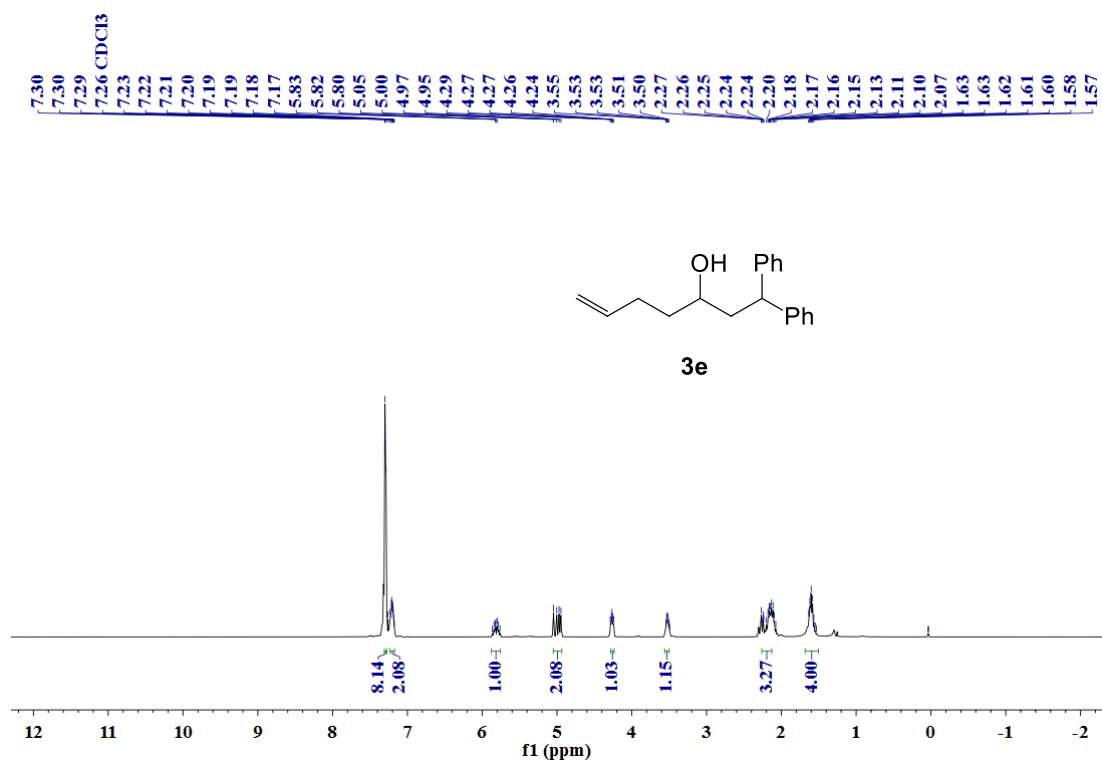

$^{13}\text{C}$  NMR (100 MHz,  $\text{CDCl}_3$ ):

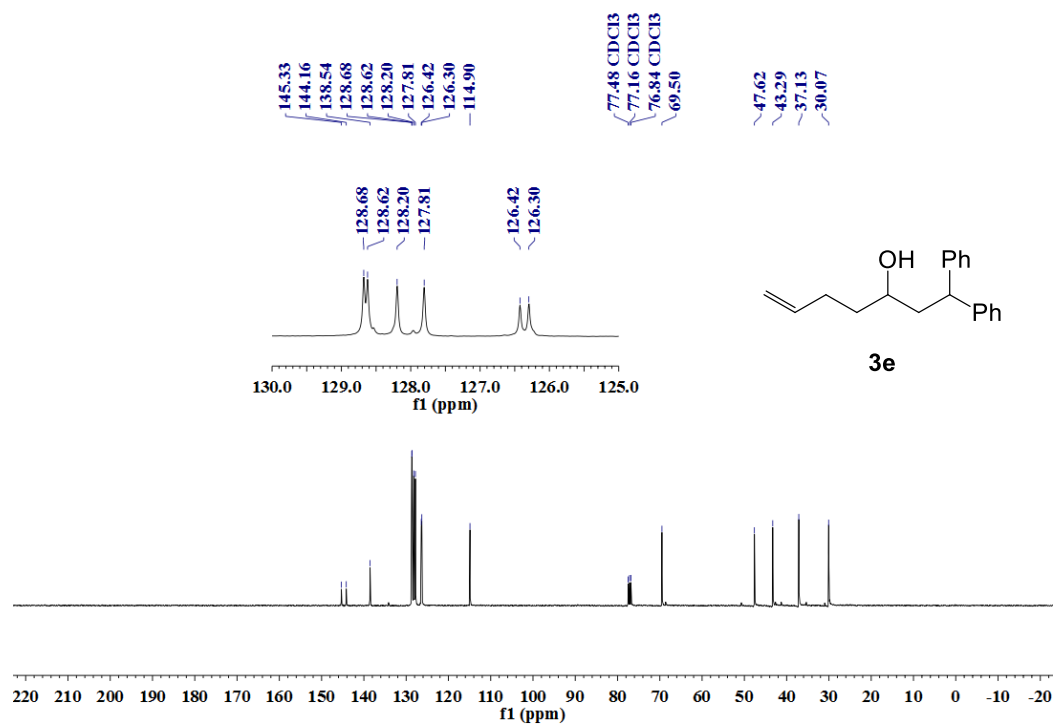

$^1\text{H}$  NMR (400 MHz,  $\text{CDCl}_3$ ):

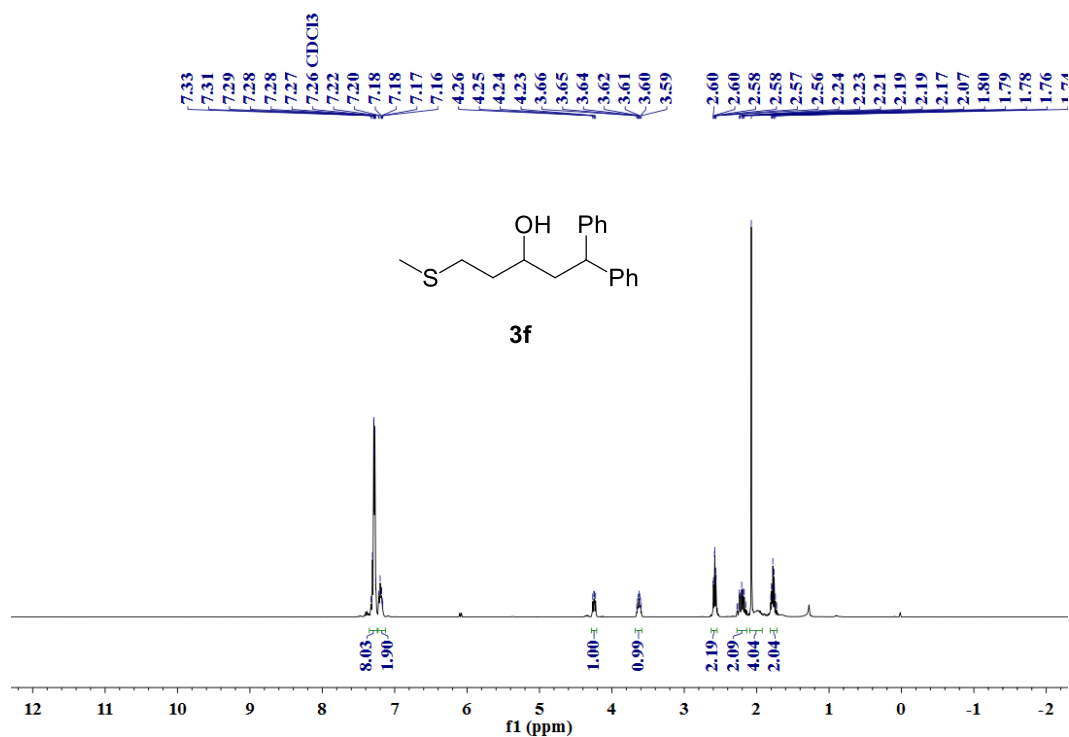

$^{13}\text{C}$  NMR (100 MHz,  $\text{CDCl}_3$ ):

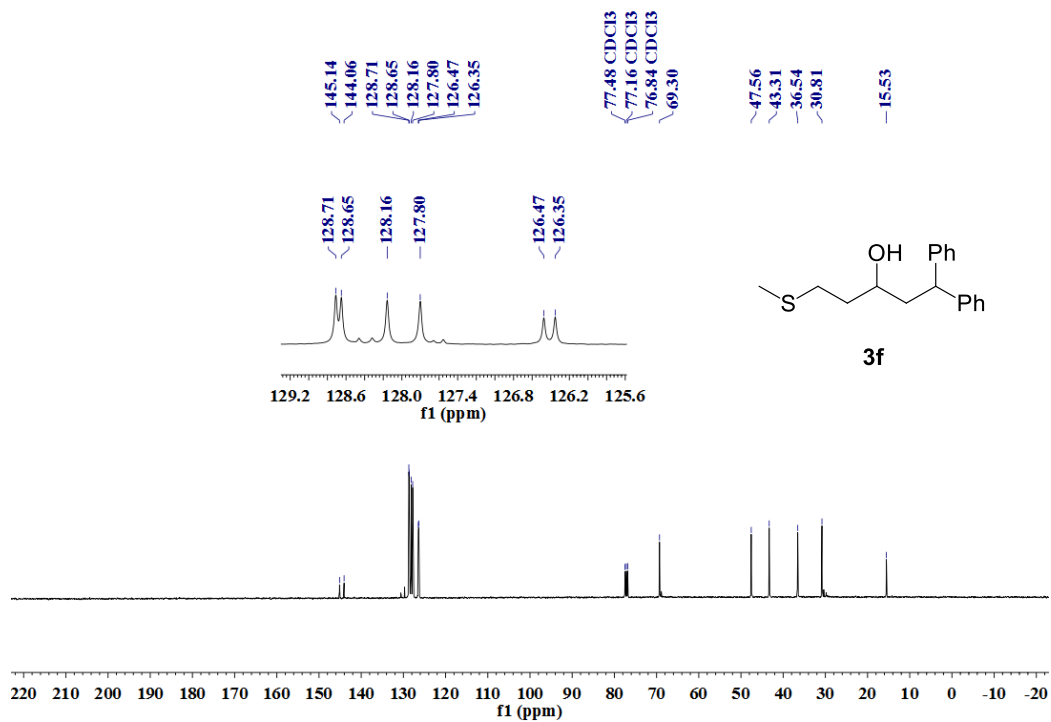

$^1\text{H}$  NMR (400 MHz,  $\text{CDCl}_3$ ):

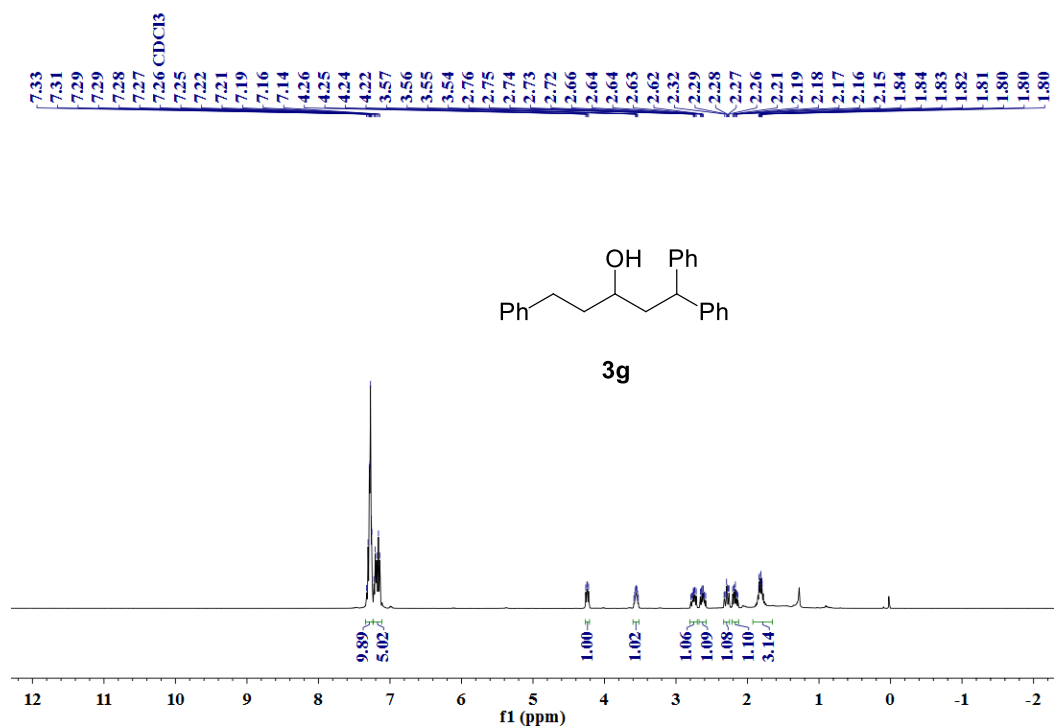

$^{13}\text{C}$  NMR (100 MHz,  $\text{CDCl}_3$ ):

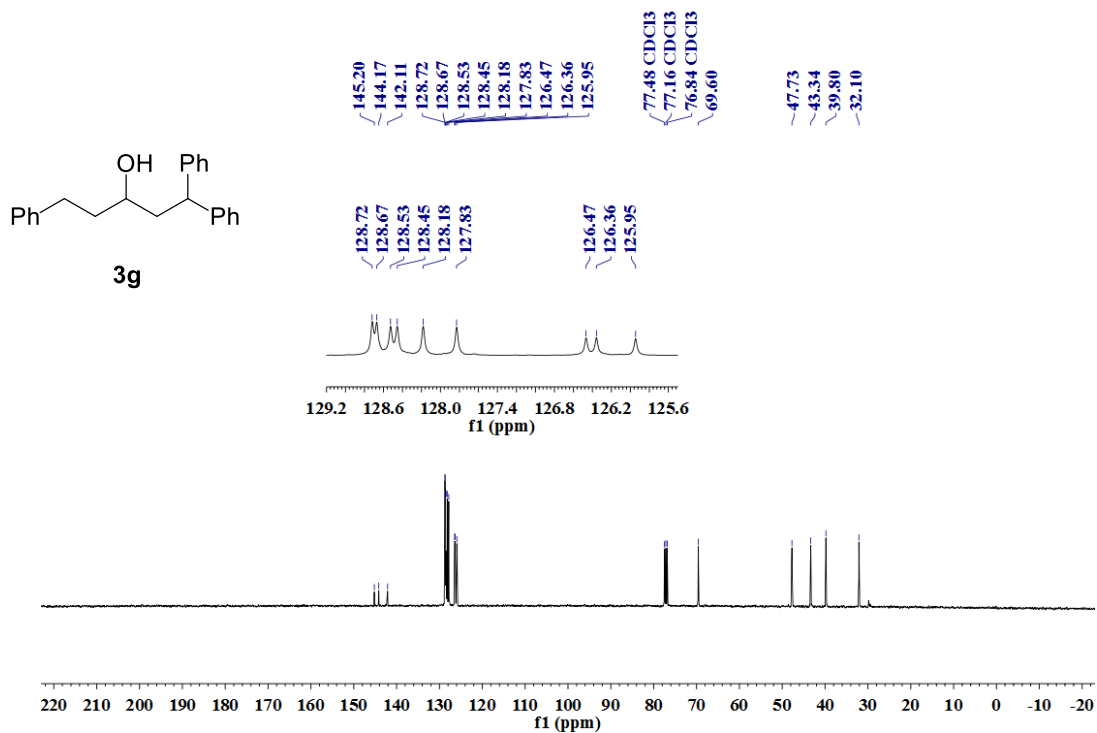

$^1\text{H}$  NMR (400 MHz,  $\text{CDCl}_3$ ):

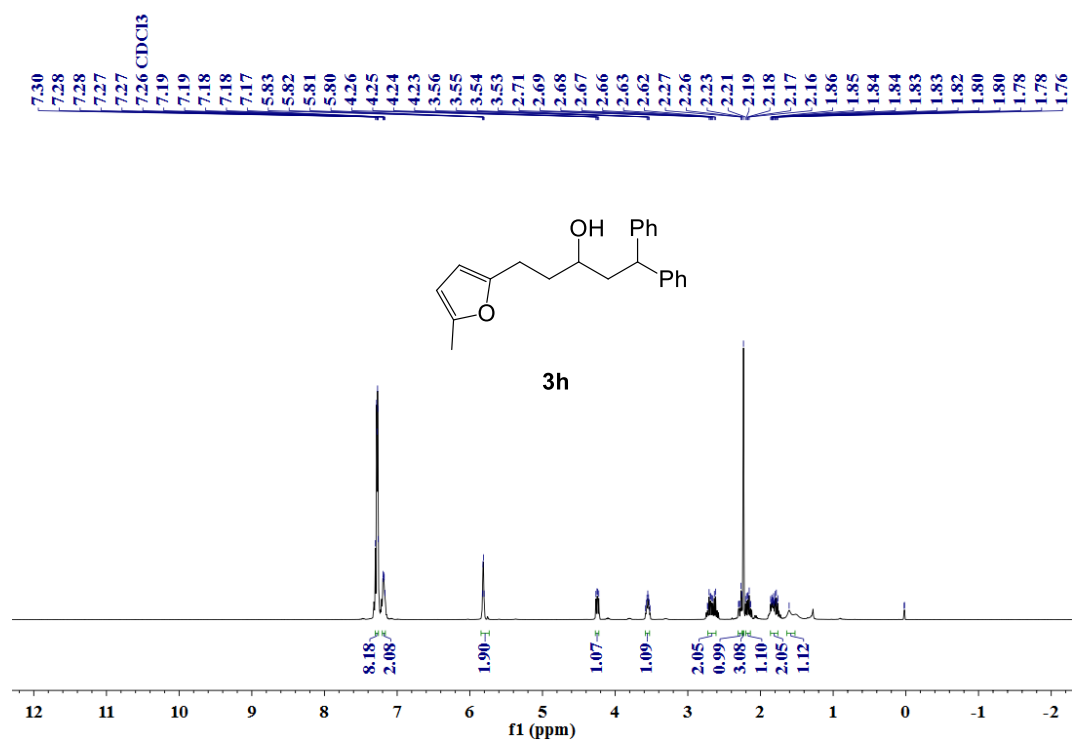

$^{13}\text{C}$  NMR (100 MHz,  $\text{CDCl}_3$ ):

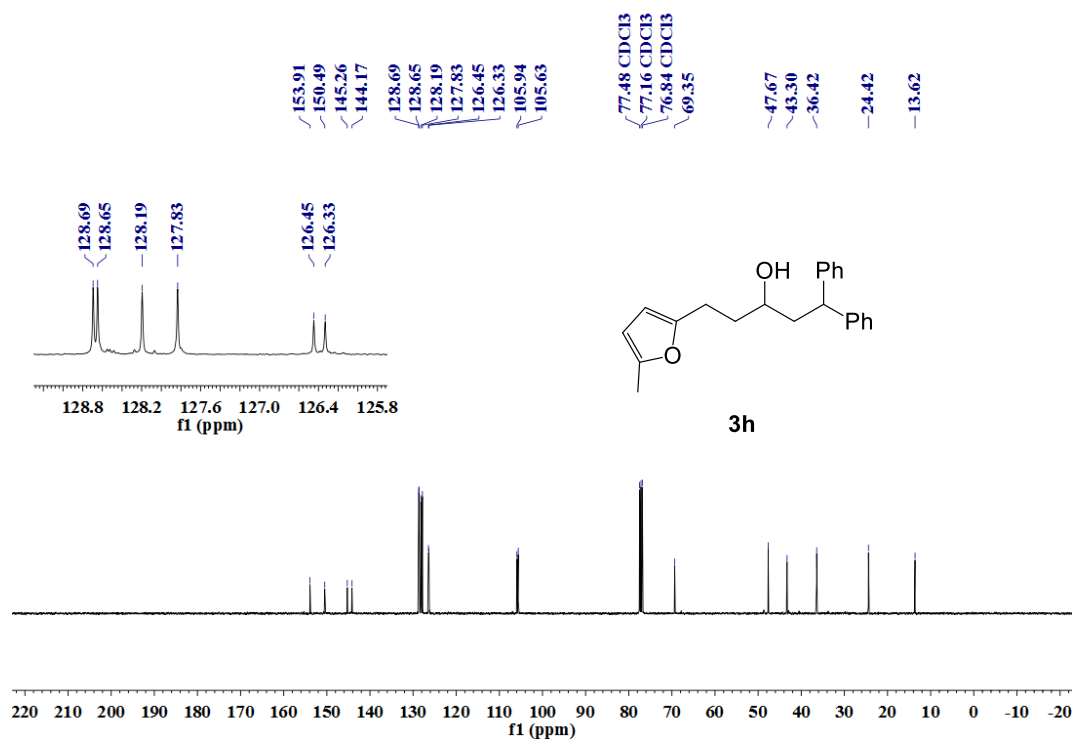

$^1\text{H}$  NMR (400 MHz,  $\text{CDCl}_3$ ):

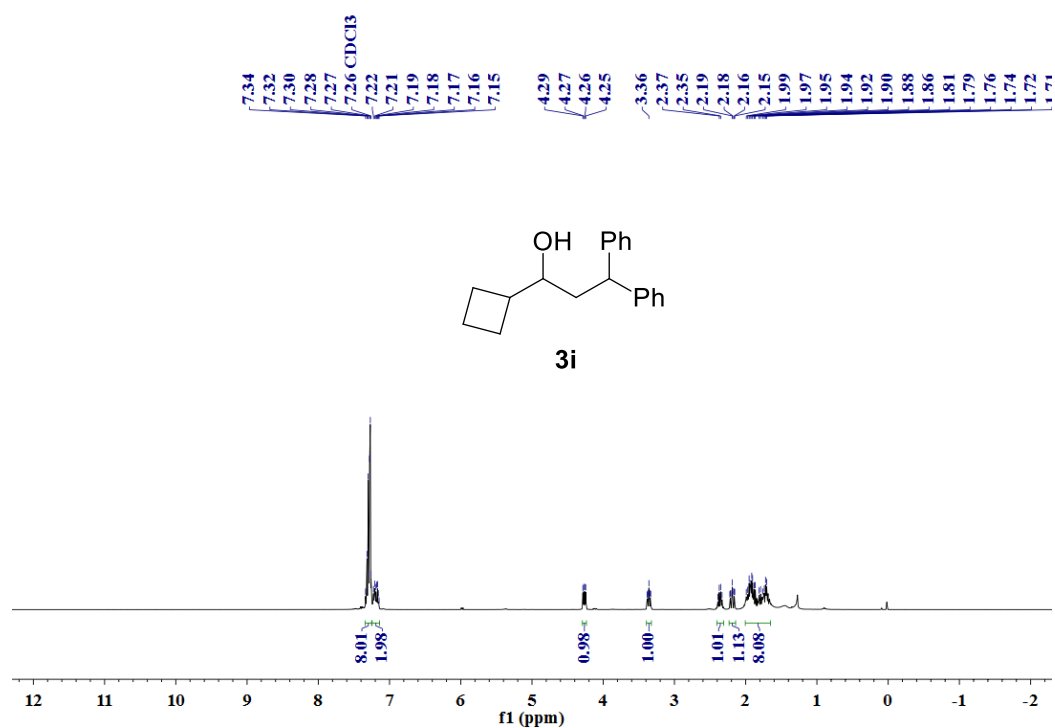

$^{13}\text{C}$  NMR (100 MHz,  $\text{CDCl}_3$ ):

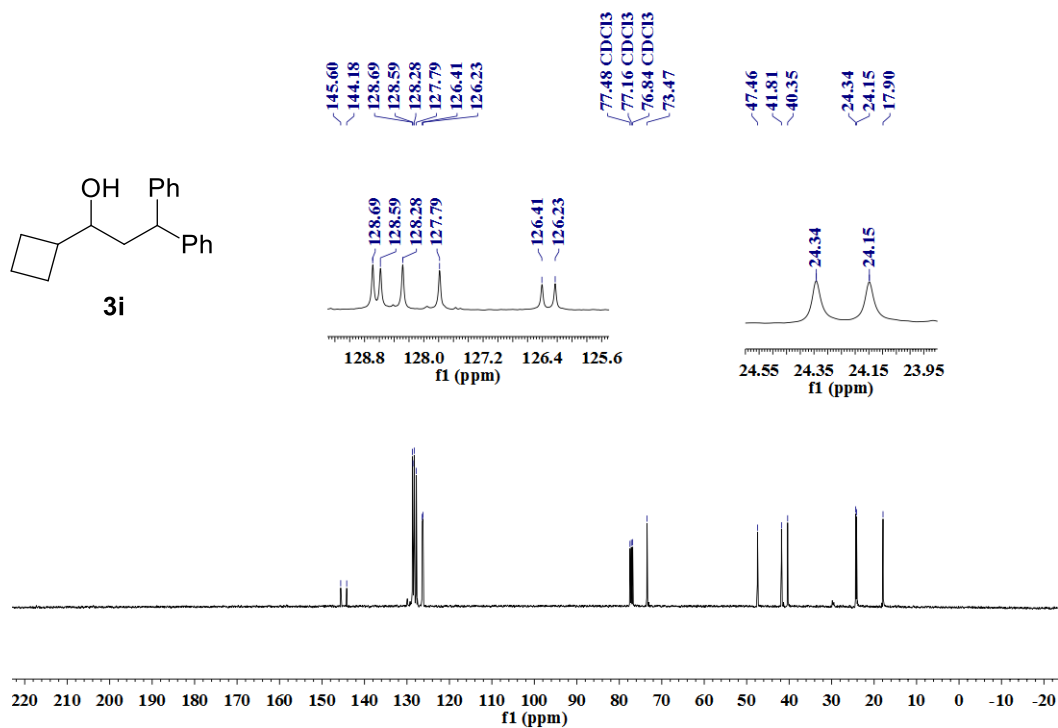

$^1\text{H}$  NMR (400 MHz,  $\text{CDCl}_3$ ):

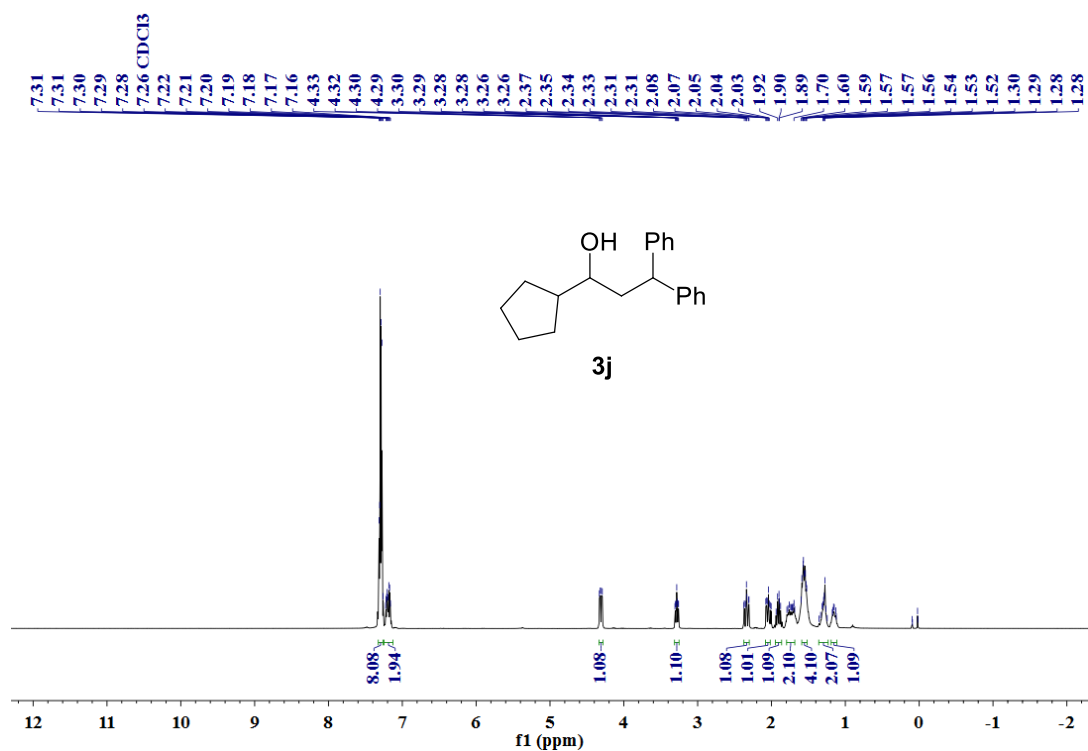

$^{13}\text{C}$  NMR (100 MHz,  $\text{CDCl}_3$ ):

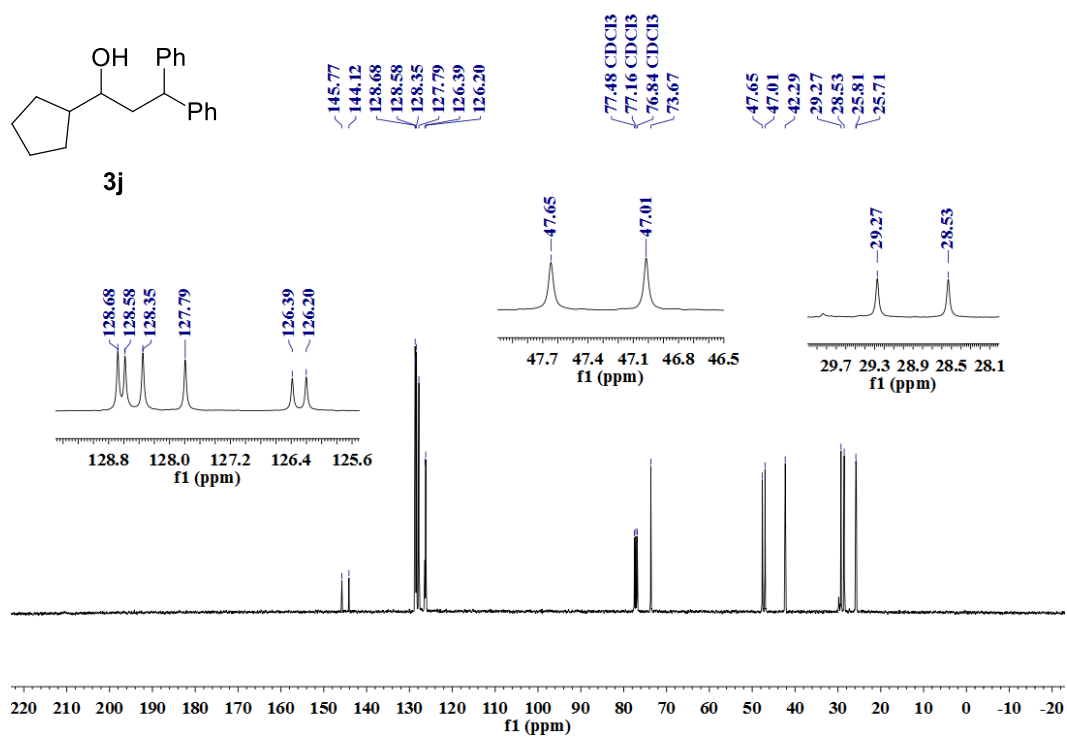



$^1\text{H}$  NMR (400 MHz,  $\text{CDCl}_3$ ):

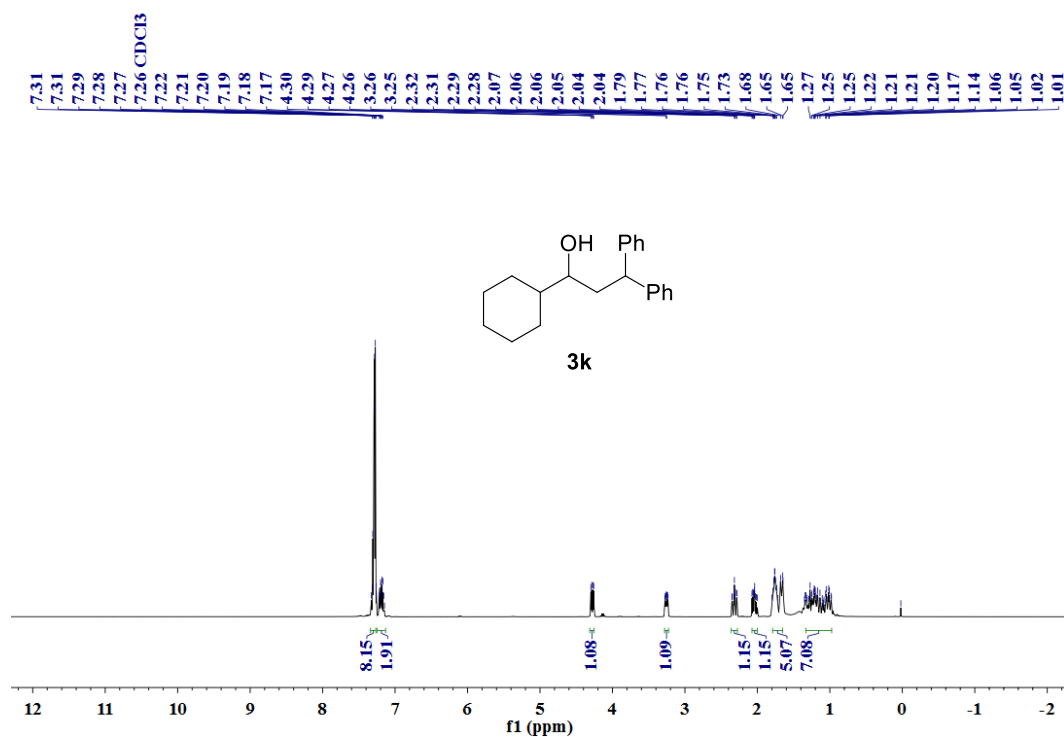

$^{13}\text{C}$  NMR (100 MHz,  $\text{CDCl}_3$ ):

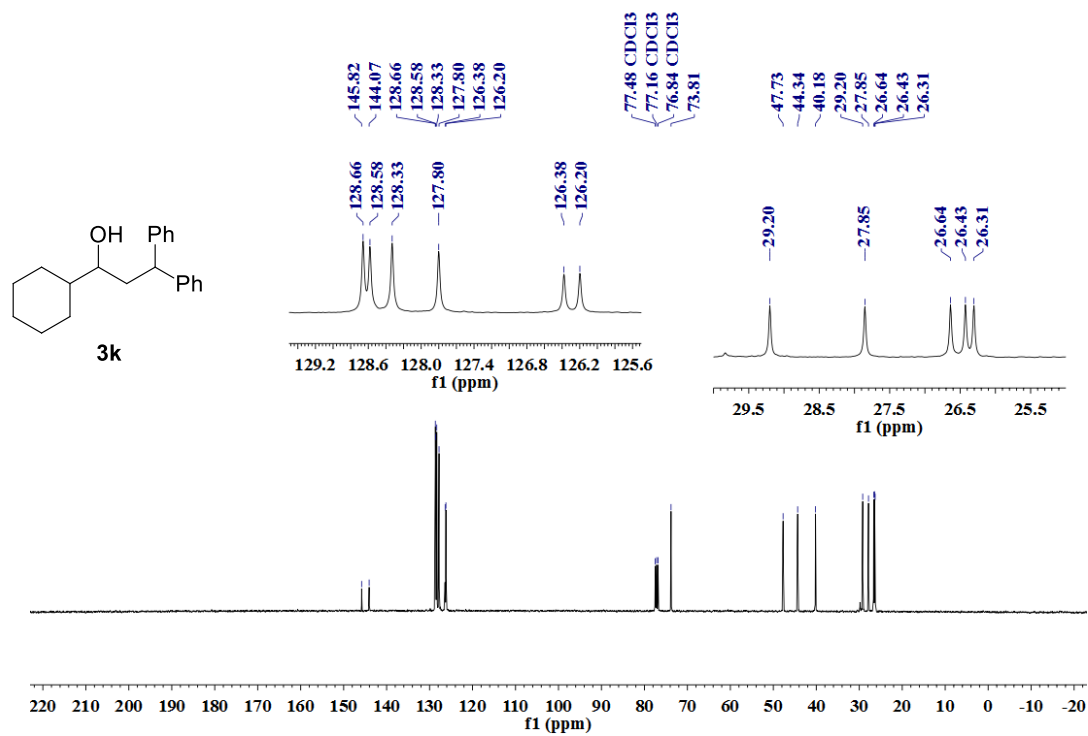

$^1\text{H}$  NMR (400 MHz,  $\text{CDCl}_3$ ):

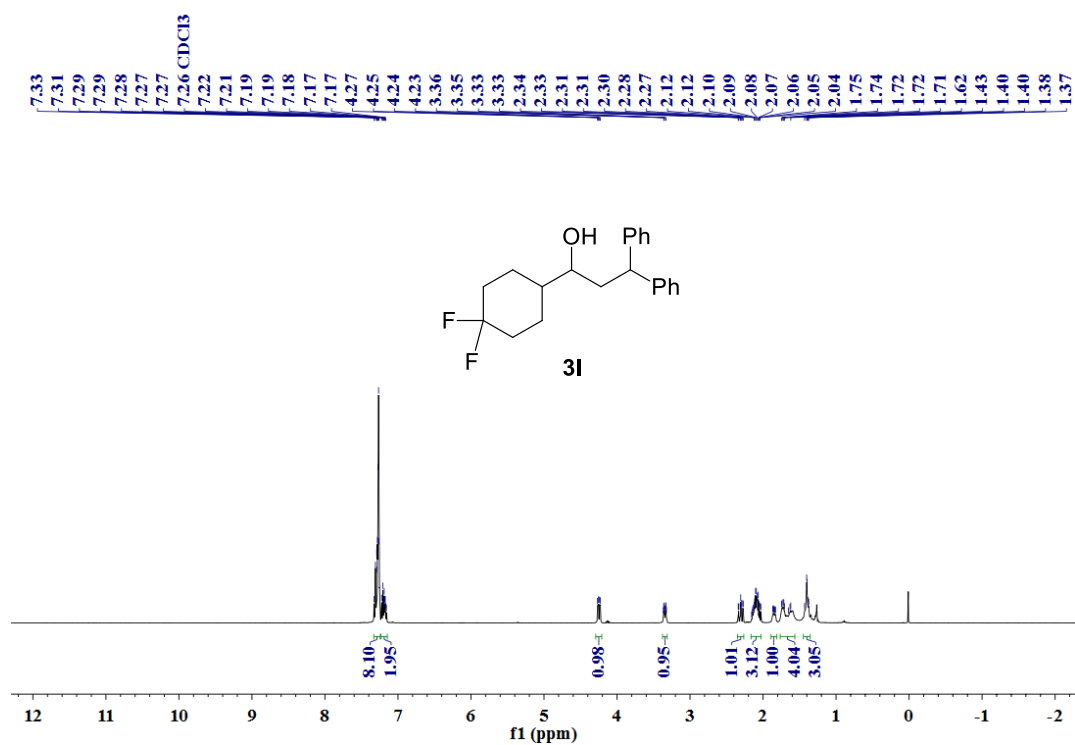

$^{13}\text{C}$  NMR (100 MHz,  $\text{CDCl}_3$ ):

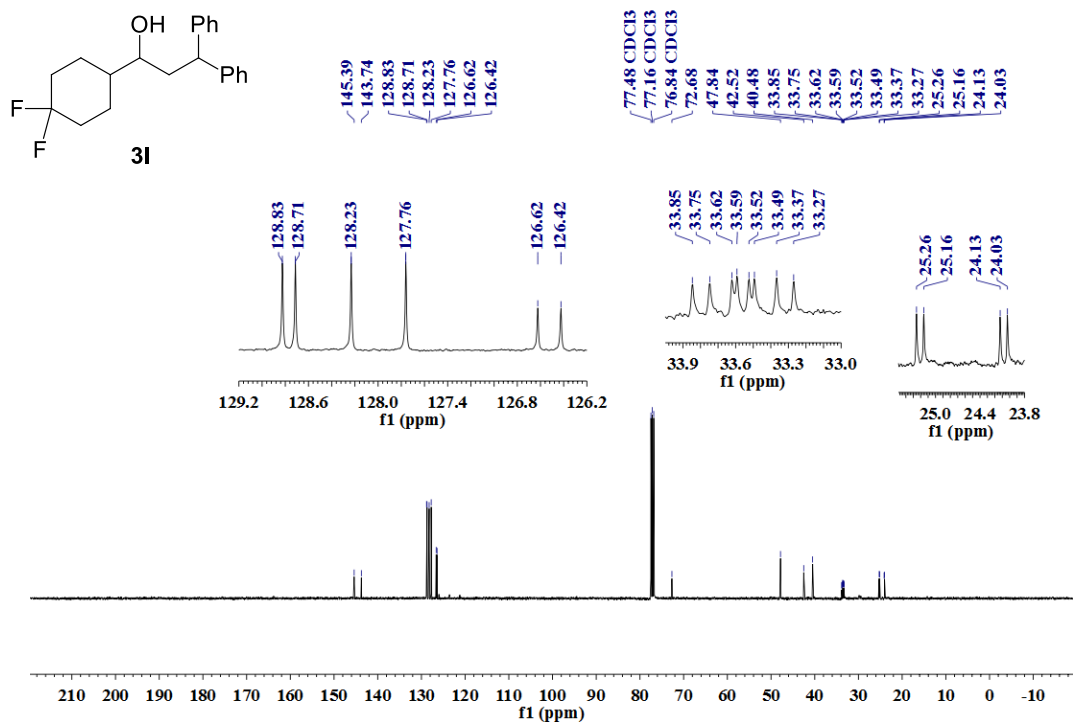

$^{19}\text{F}$  NMR (376 MHz,  $\text{CDCl}_3$ ):

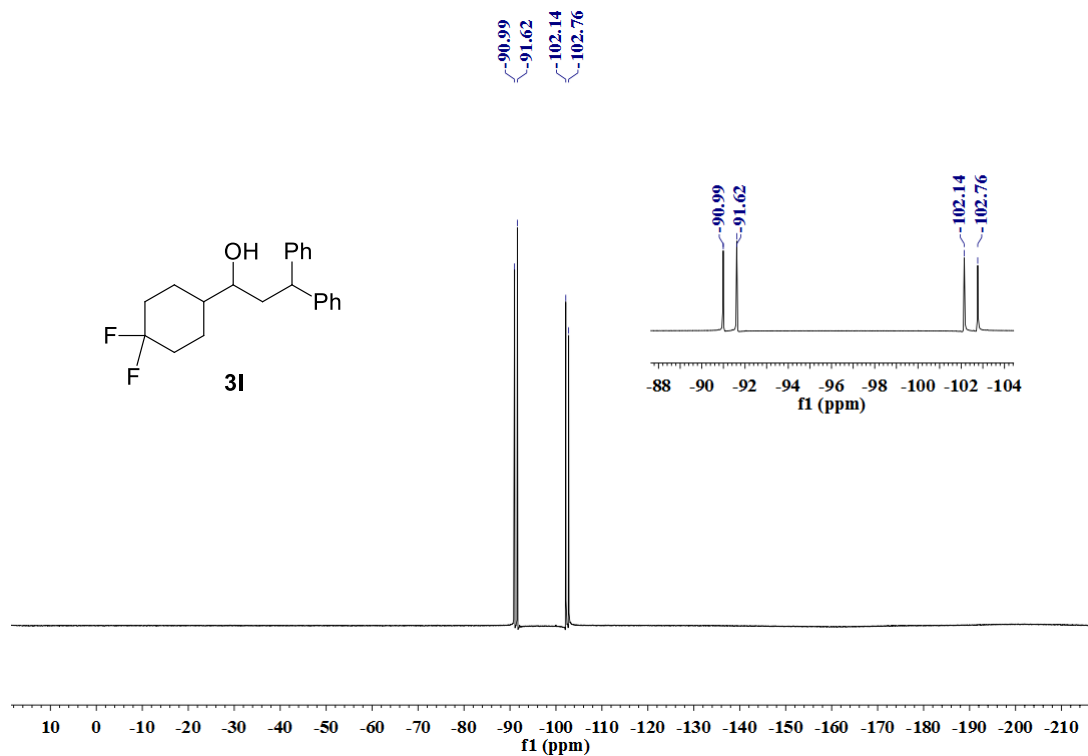

$^1\text{H}$  NMR (400 MHz,  $\text{CDCl}_3$ ):

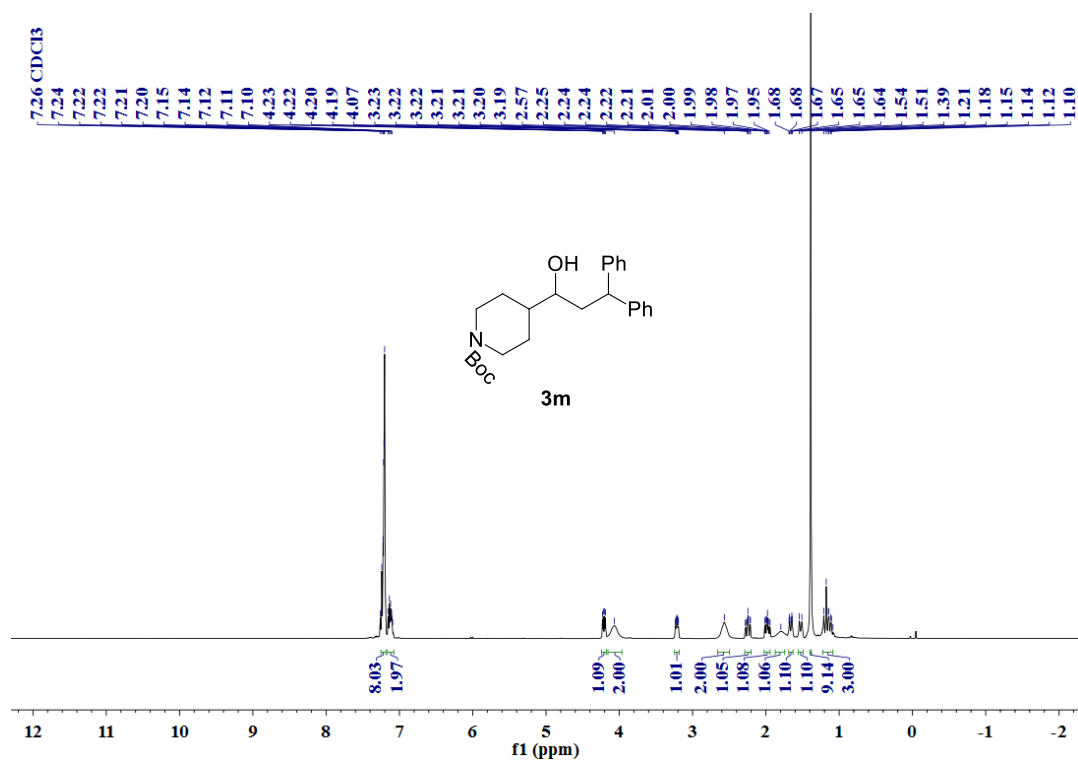

$^{13}\text{C}$  NMR (100 MHz,  $\text{CDCl}_3$ ):

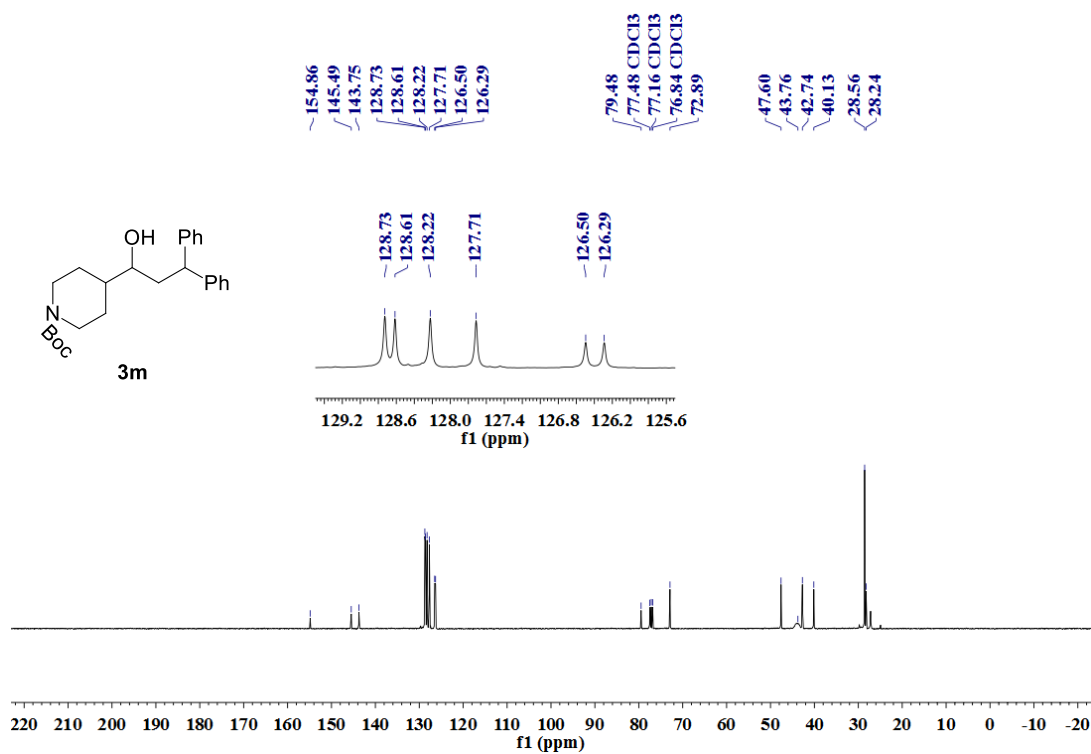

$^1\text{H}$  NMR (400 MHz,  $\text{CDCl}_3$ ):

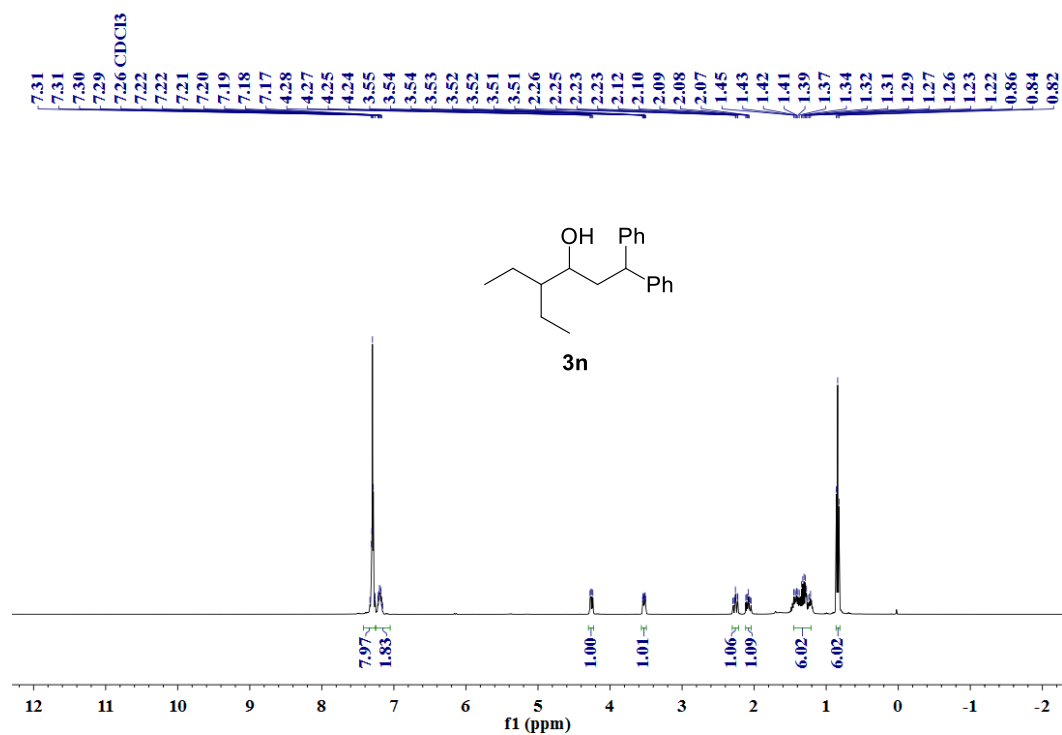

$^{13}\text{C}$  NMR (100 MHz,  $\text{CDCl}_3$ ):

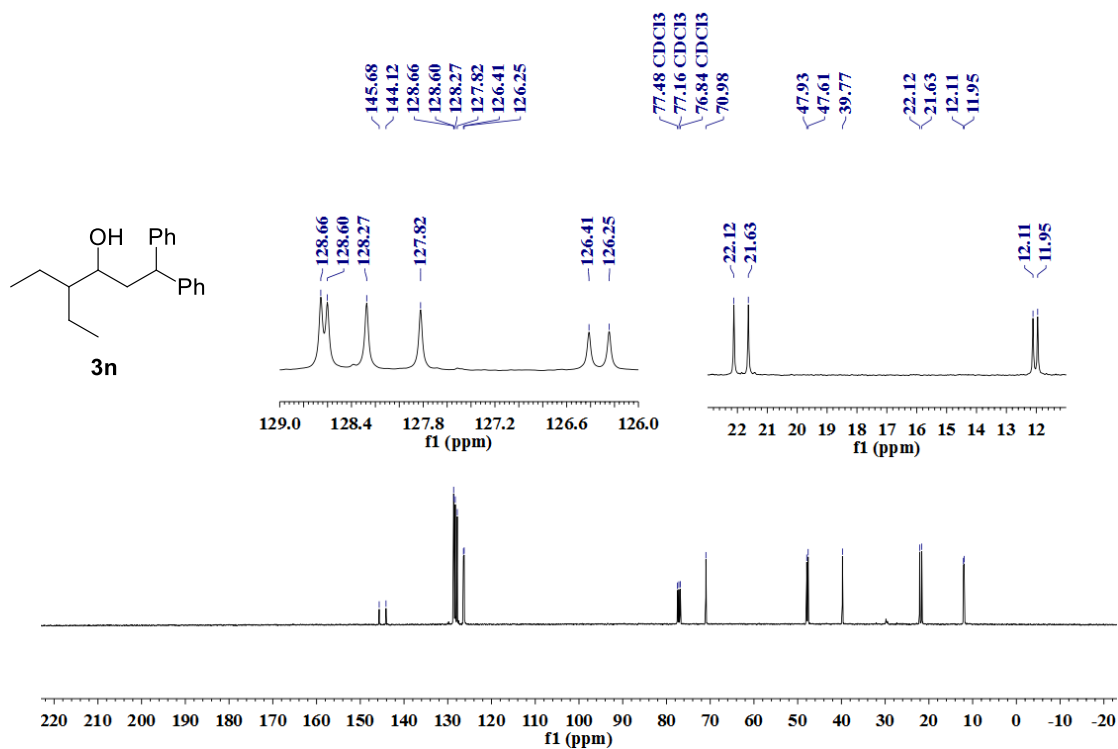

$^1\text{H}$  NMR (400 MHz,  $\text{CDCl}_3$ ):

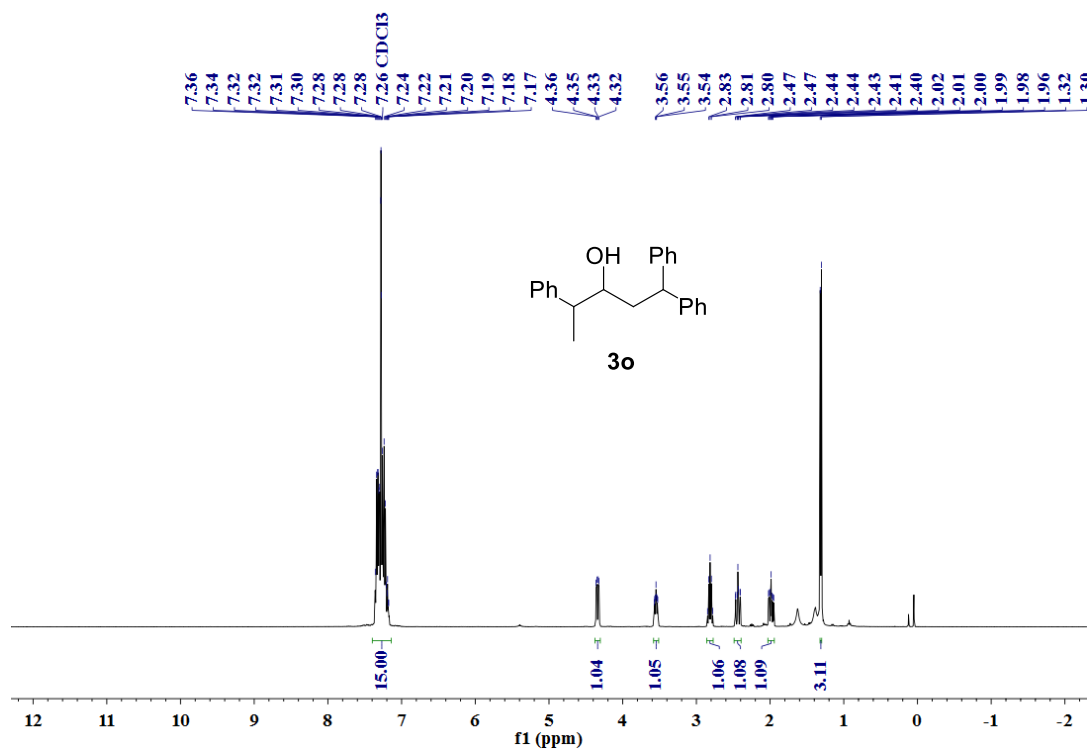

$^{13}\text{C}$  NMR (100 MHz,  $\text{CDCl}_3$ ):

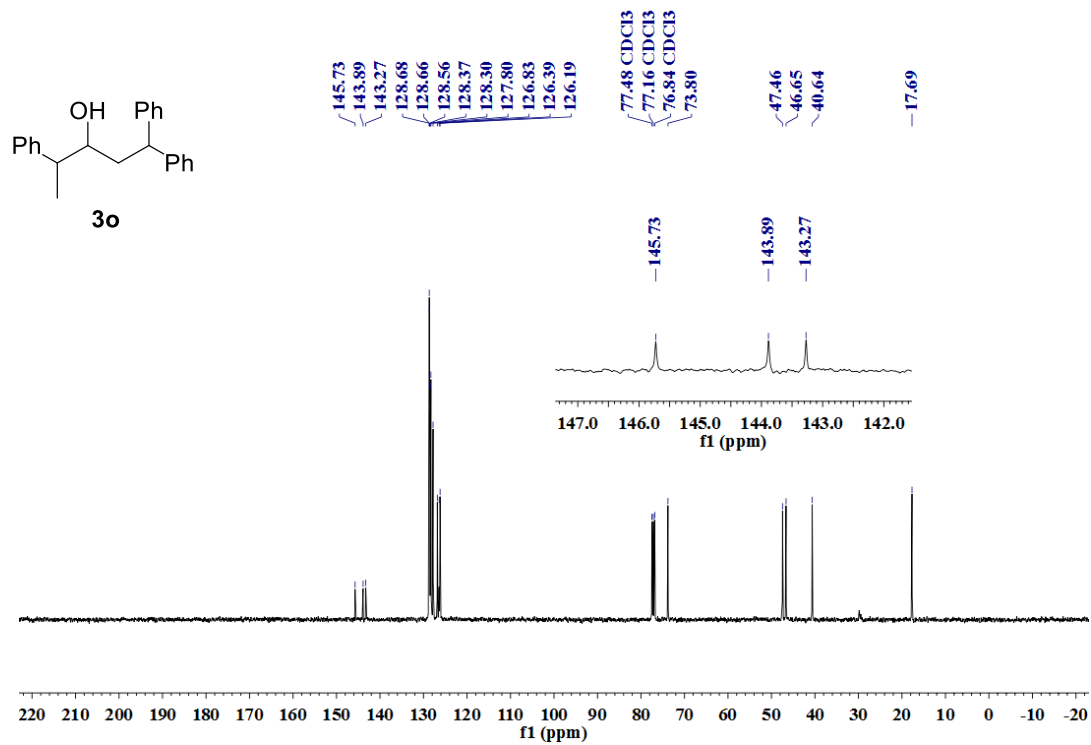

$^1\text{H}$  NMR (400 MHz,  $\text{CDCl}_3$ ):

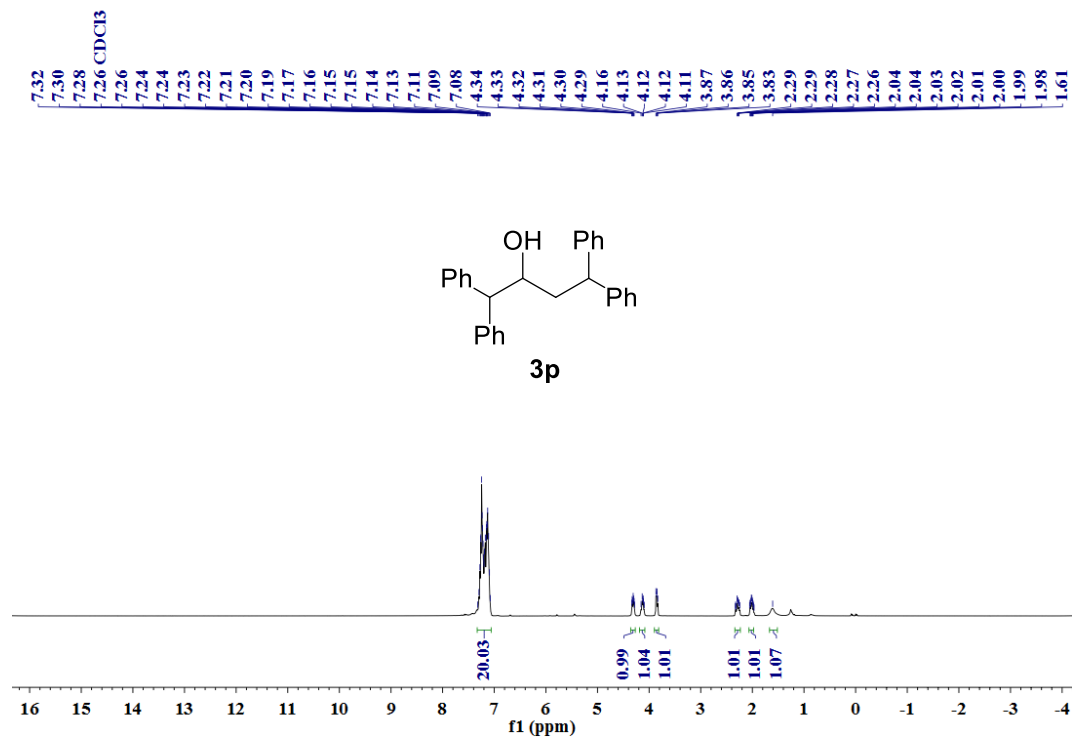

$^{13}\text{C}$  NMR (100 MHz,  $\text{CDCl}_3$ ):

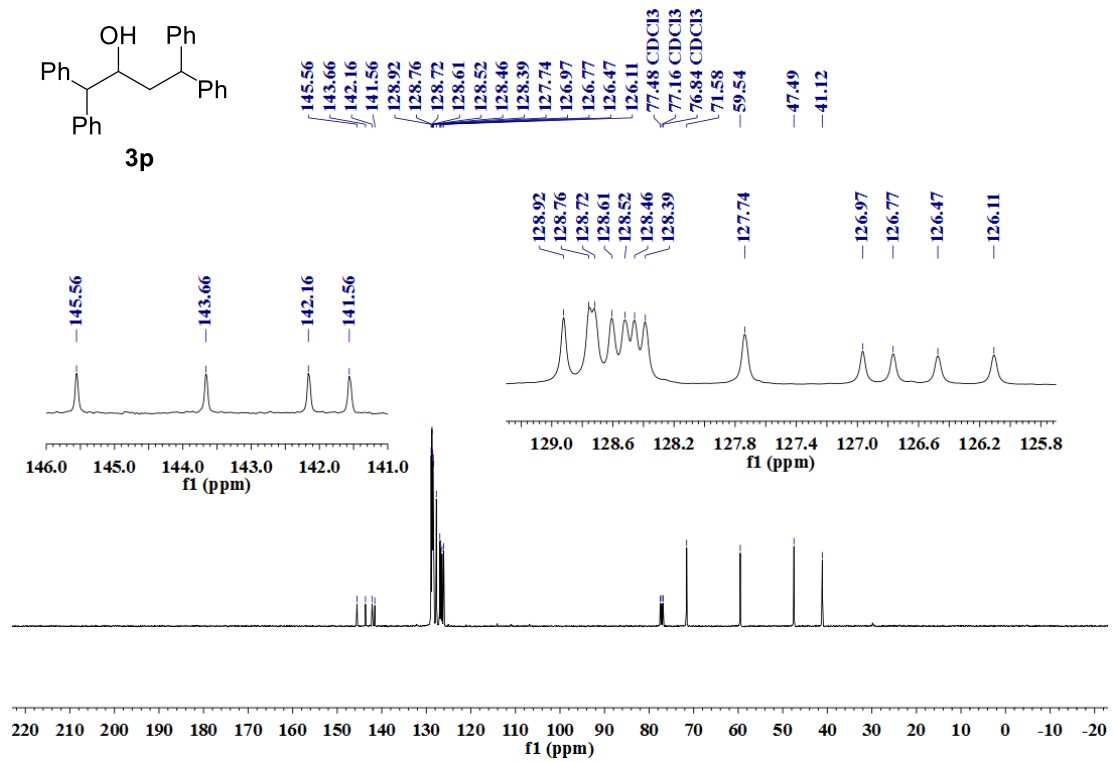

$^1\text{H}$  NMR (400 MHz,  $\text{CDCl}_3$ ):

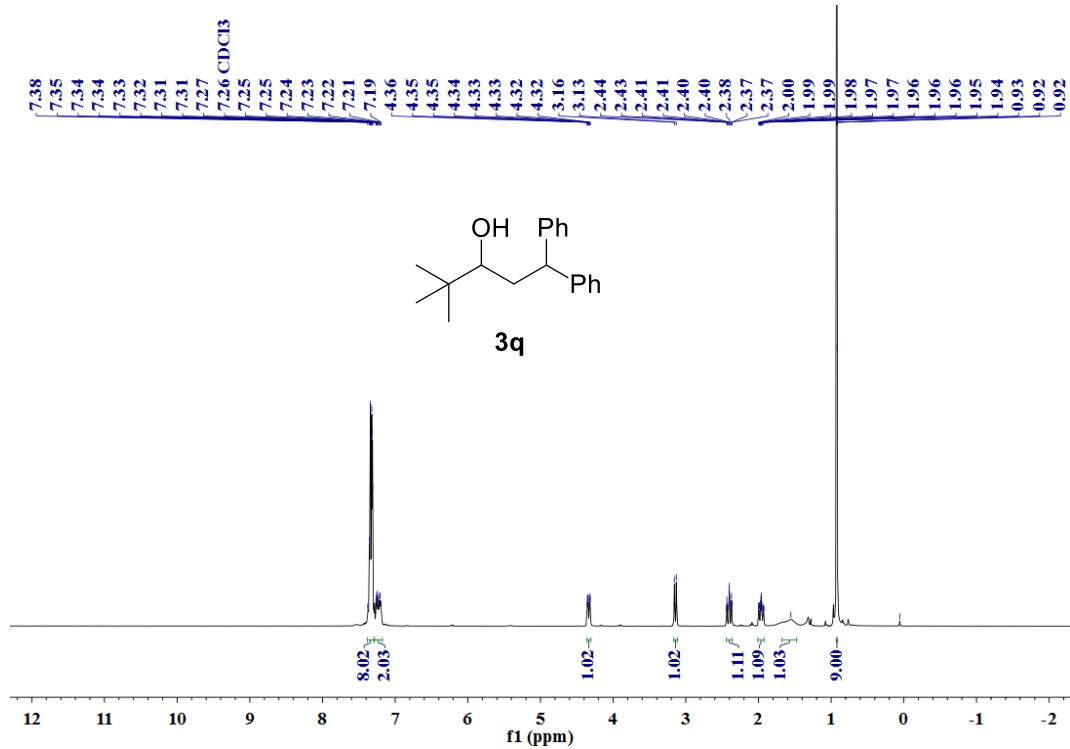

$^{13}\text{C}$  NMR (100 MHz,  $\text{CDCl}_3$ ):

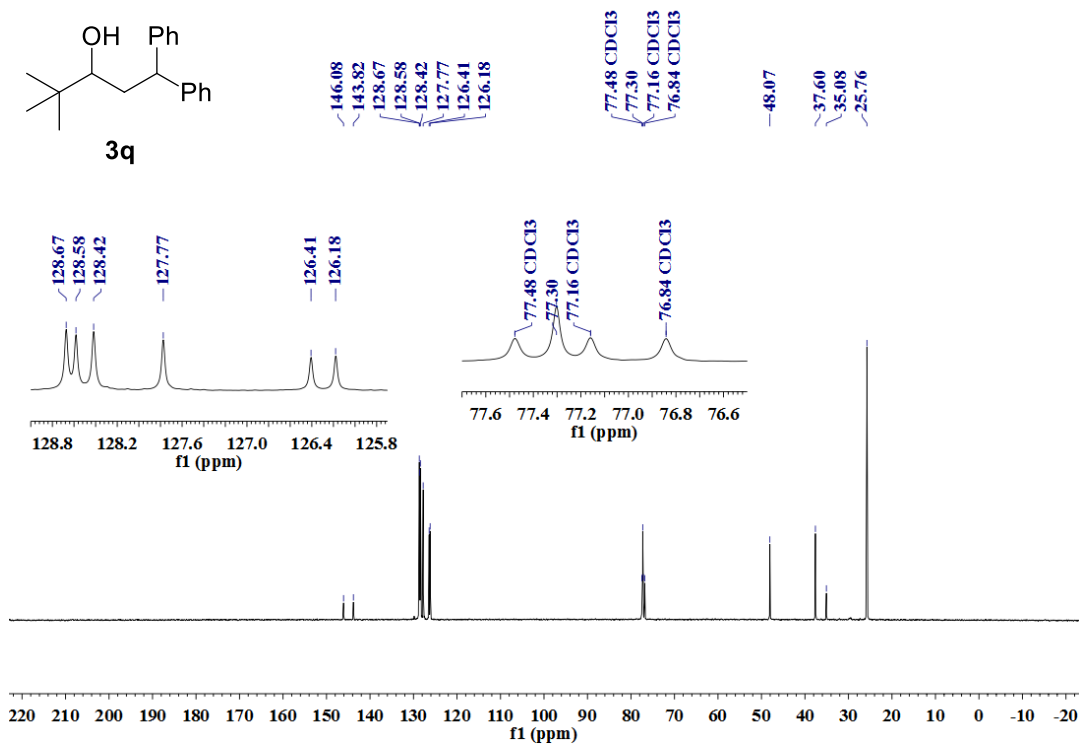

$^1\text{H}$  NMR (400 MHz,  $\text{CDCl}_3$ ):

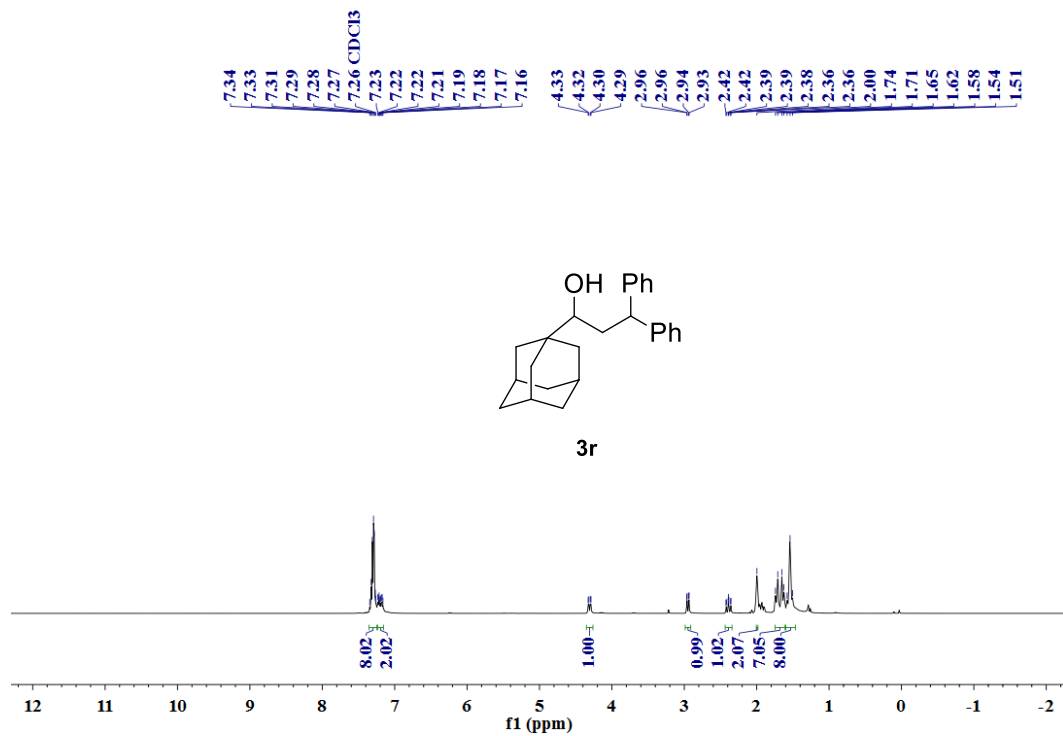



$^{13}\text{C}$  NMR (100 MHz,  $\text{CDCl}_3$ ):

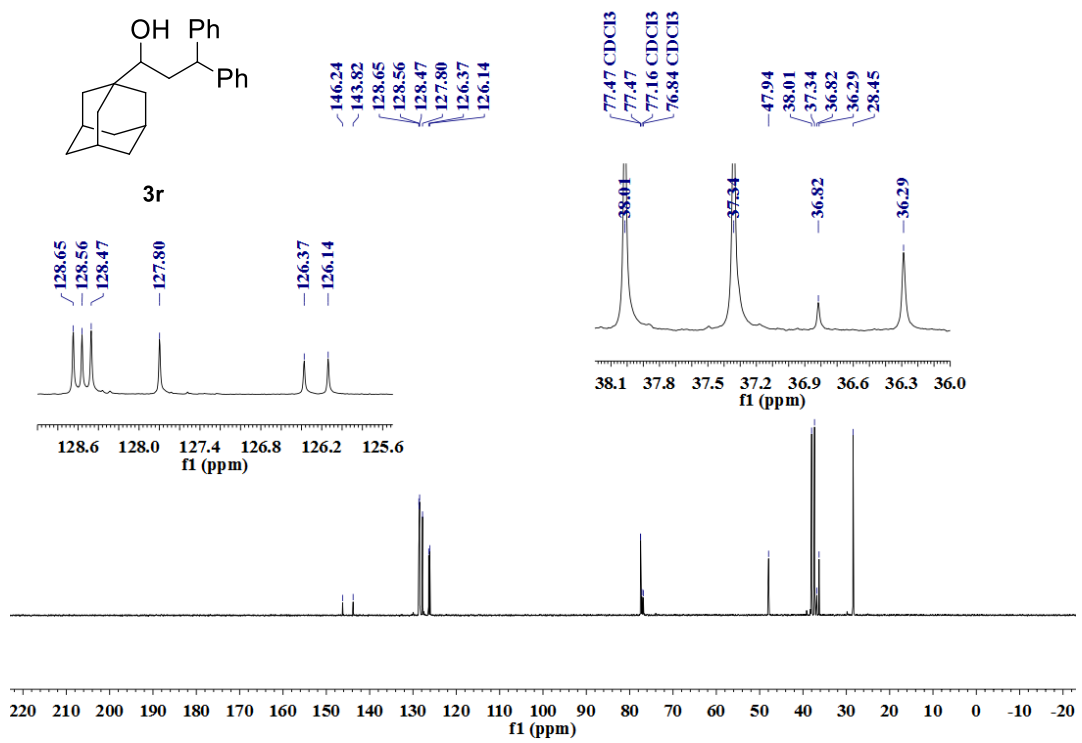

$^1\text{H}$  NMR (400 MHz,  $\text{CDCl}_3$ ):

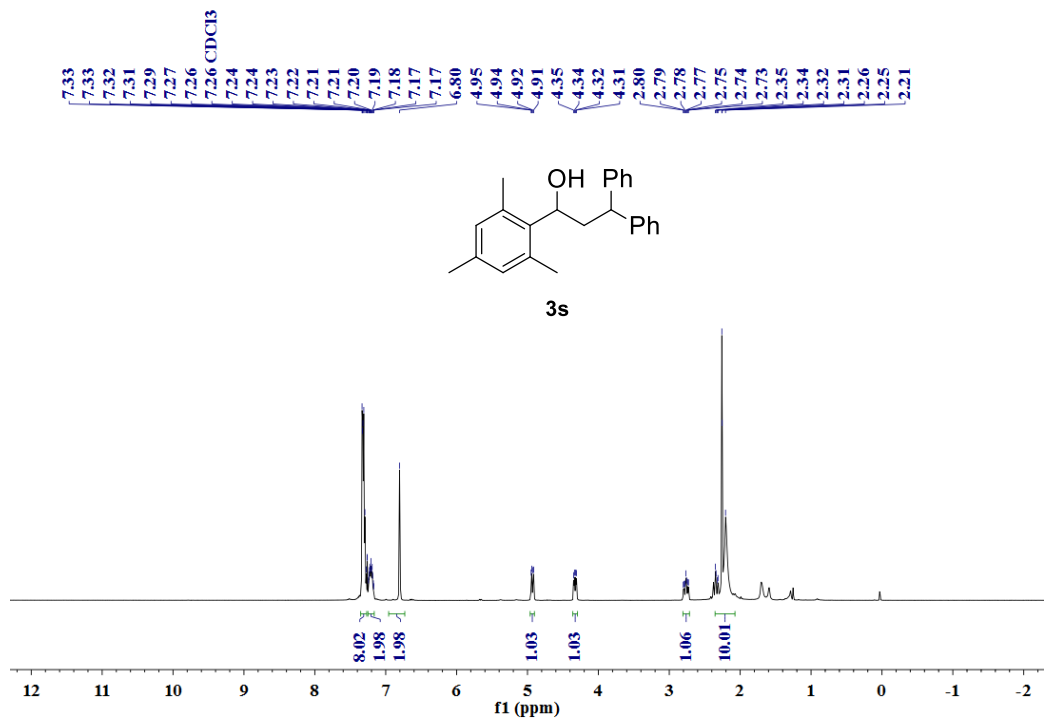

$^{13}\text{C}$  NMR (100 MHz,  $\text{CDCl}_3$ ):

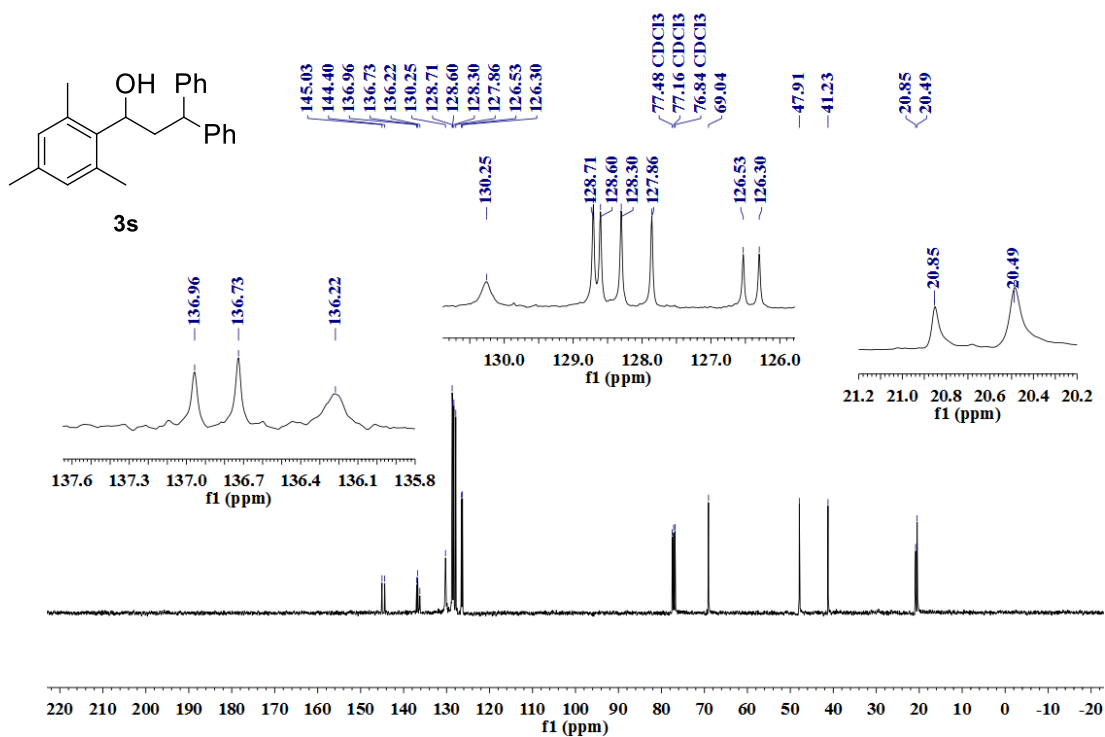

$^1\text{H}$  NMR (400 MHz,  $\text{CDCl}_3$ ):

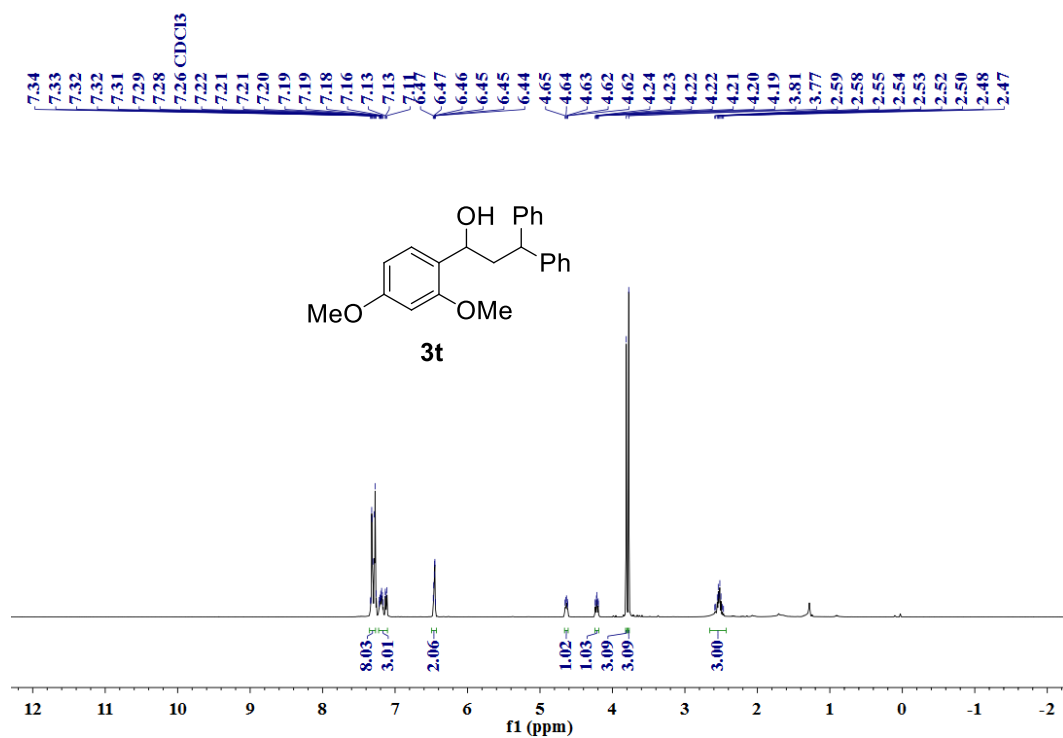

$^{13}\text{C}$  NMR (100 MHz,  $\text{CDCl}_3$ ):

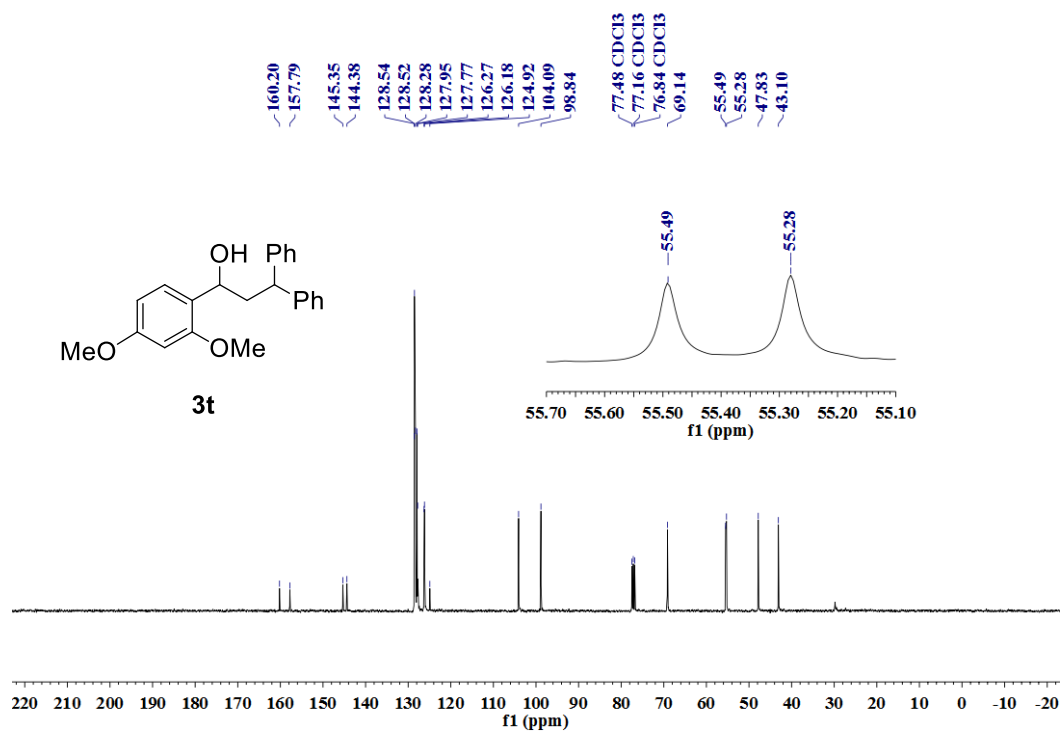

$^1\text{H}$  NMR (400 MHz,  $\text{CDCl}_3$ ):

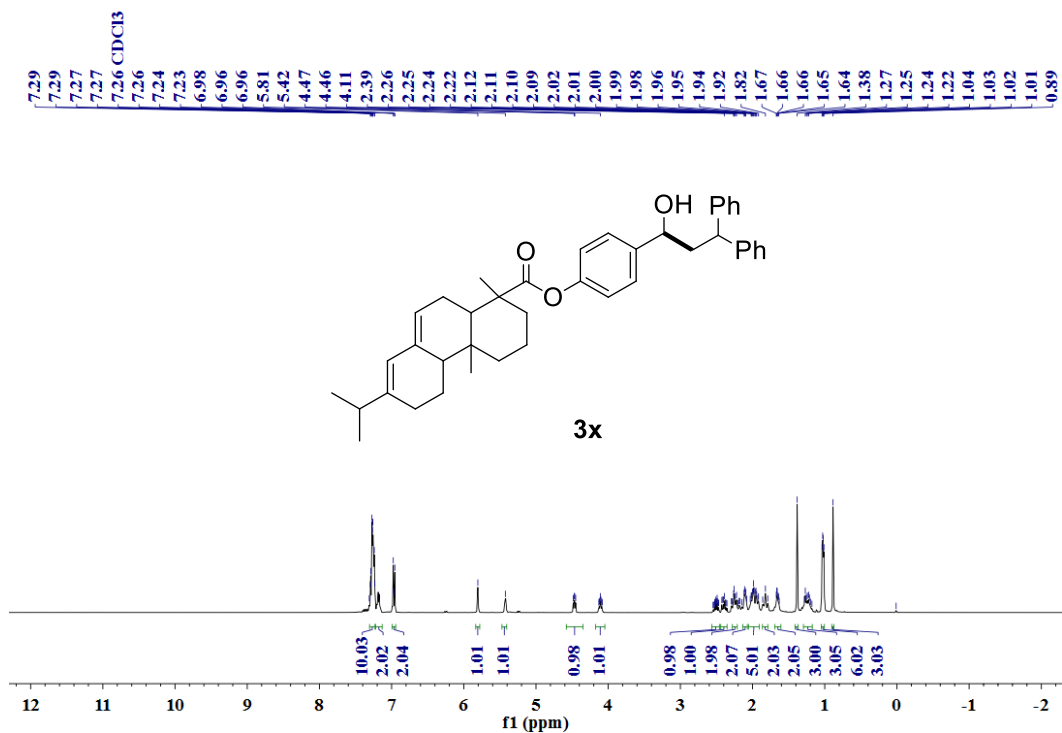

$^{13}\text{C}$  NMR (100 MHz,  $\text{CDCl}_3$ ):

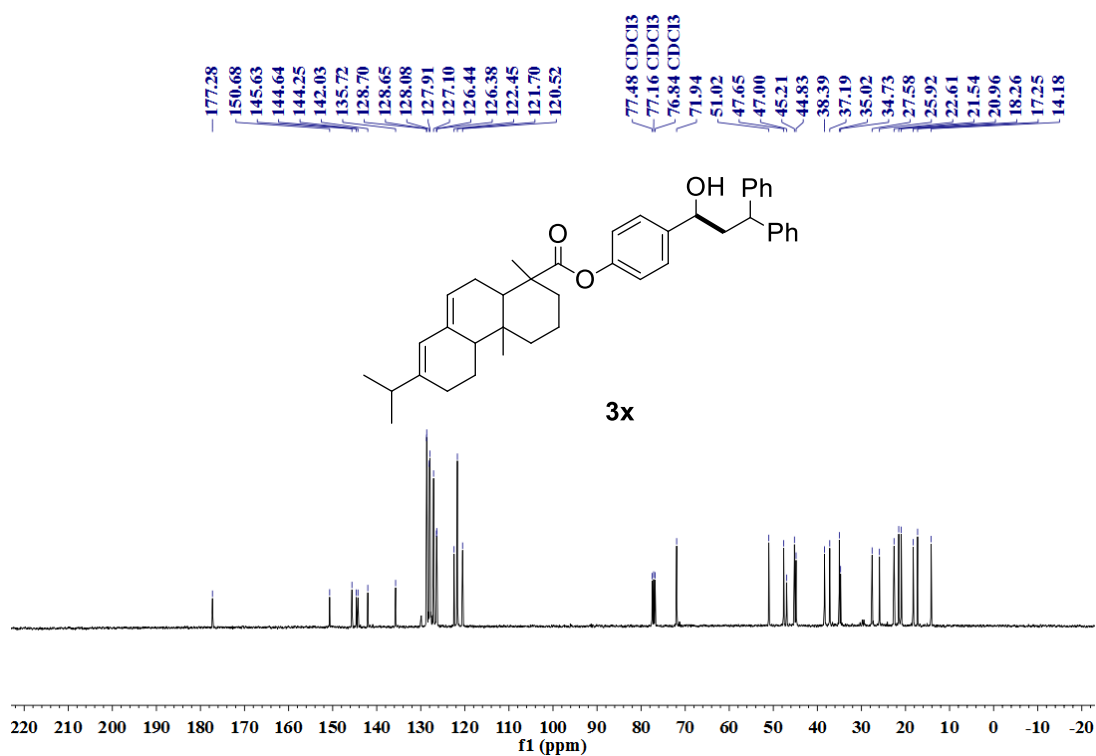

$^1\text{H}$  NMR (400 MHz,  $\text{CDCl}_3$ ):

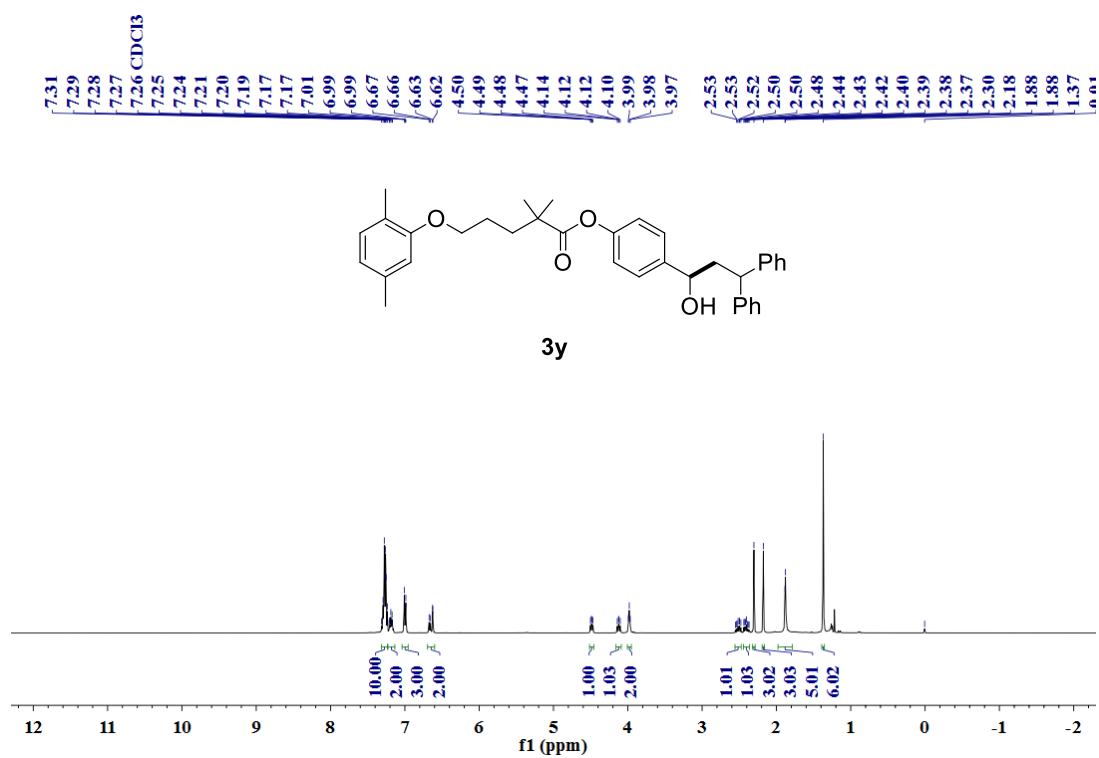

$^{13}\text{C}$  NMR (100 MHz,  $\text{CDCl}_3$ ):

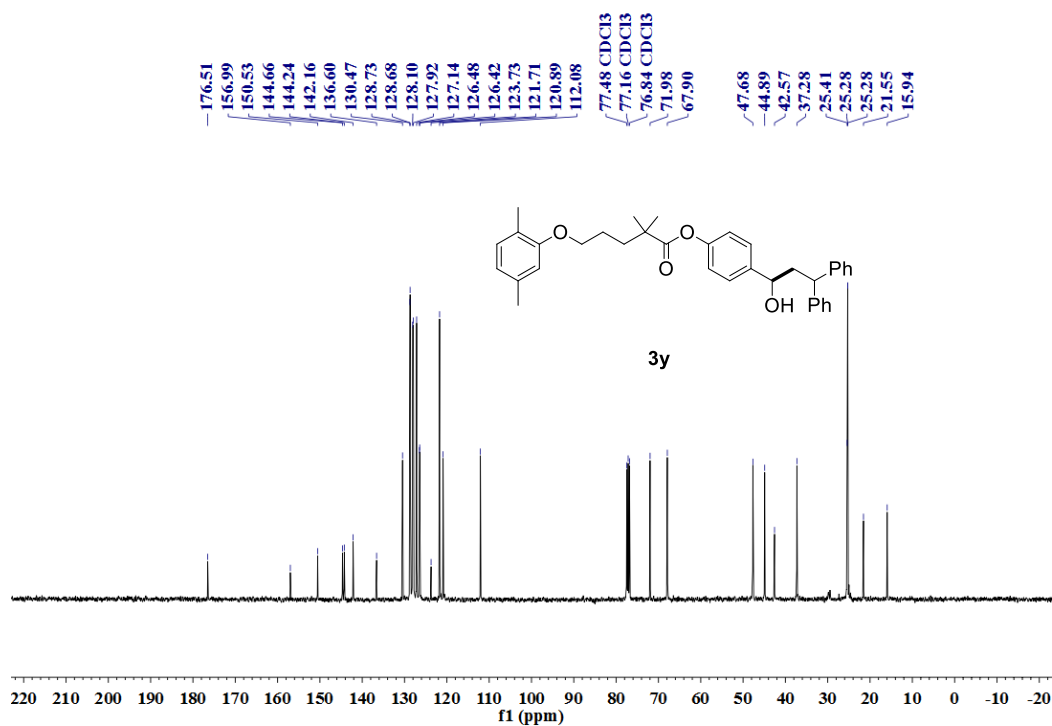

$^1\text{H}$  NMR (400 MHz,  $\text{CDCl}_3$ ):

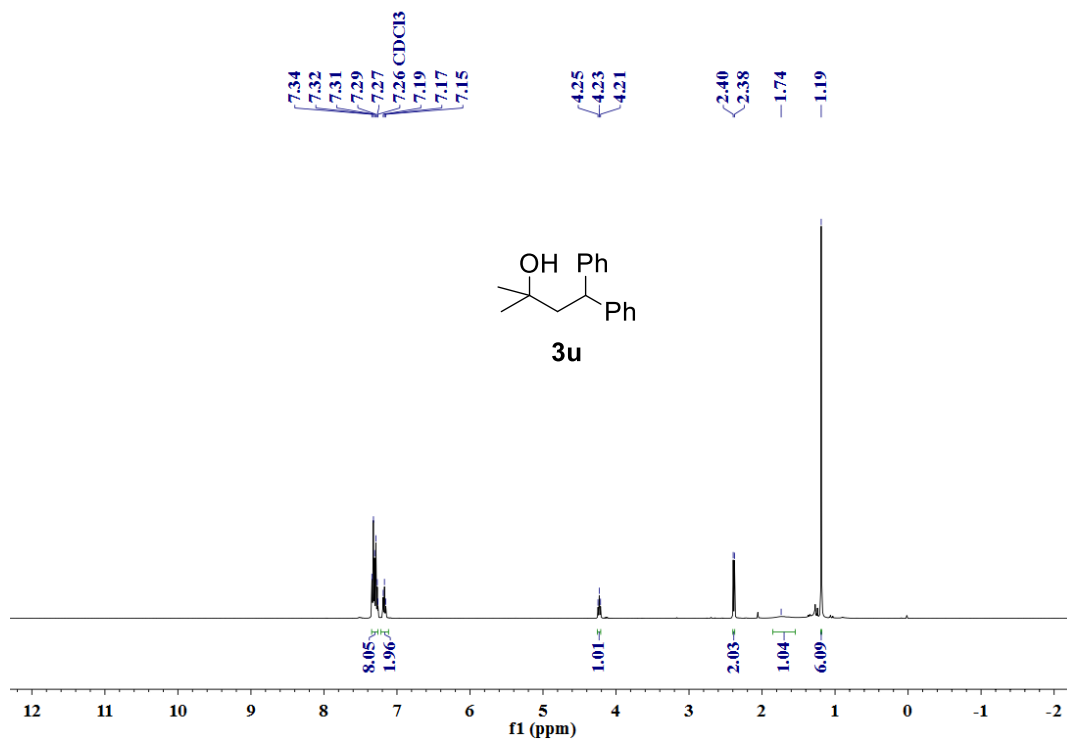

$^{13}\text{C}$  NMR (100 MHz,  $\text{CDCl}_3$ ):

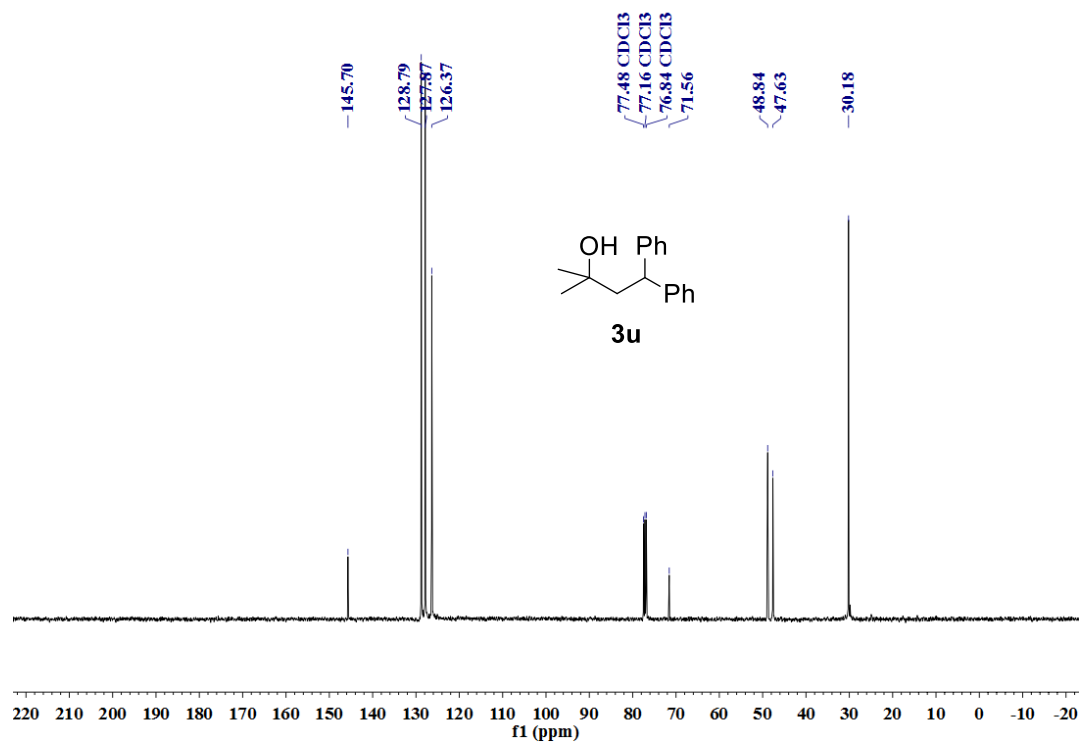

$^1\text{H}$  NMR (400 MHz,  $\text{CDCl}_3$ ):

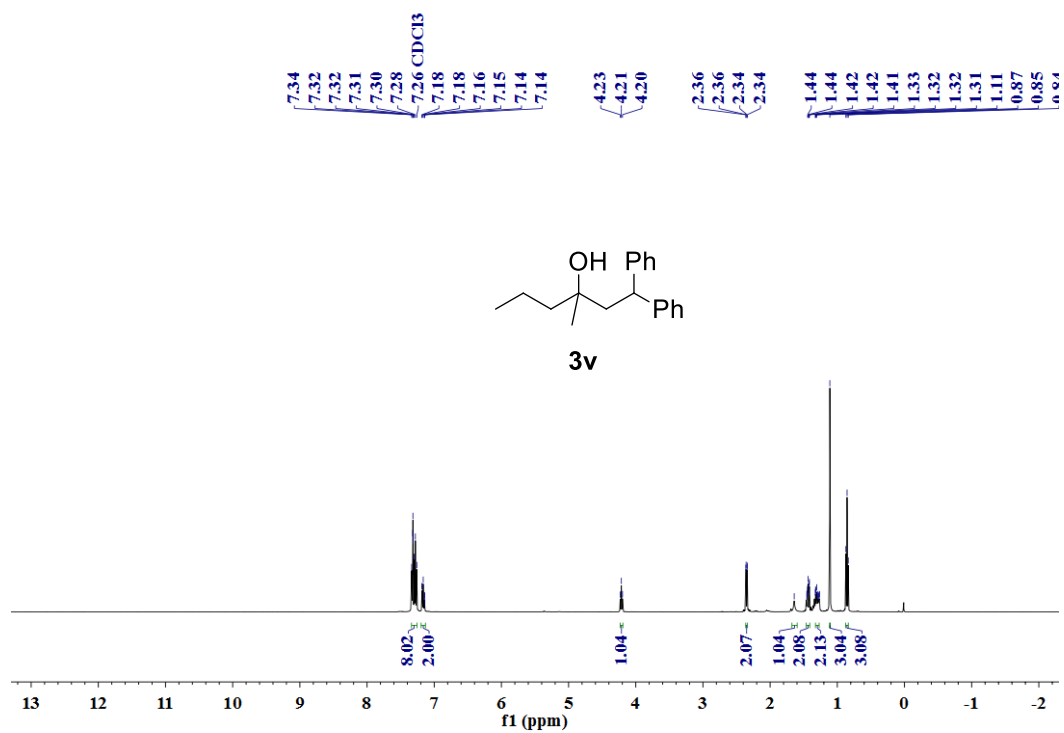

$^{13}\text{C}$  NMR (100 MHz,  $\text{CDCl}_3$ ):

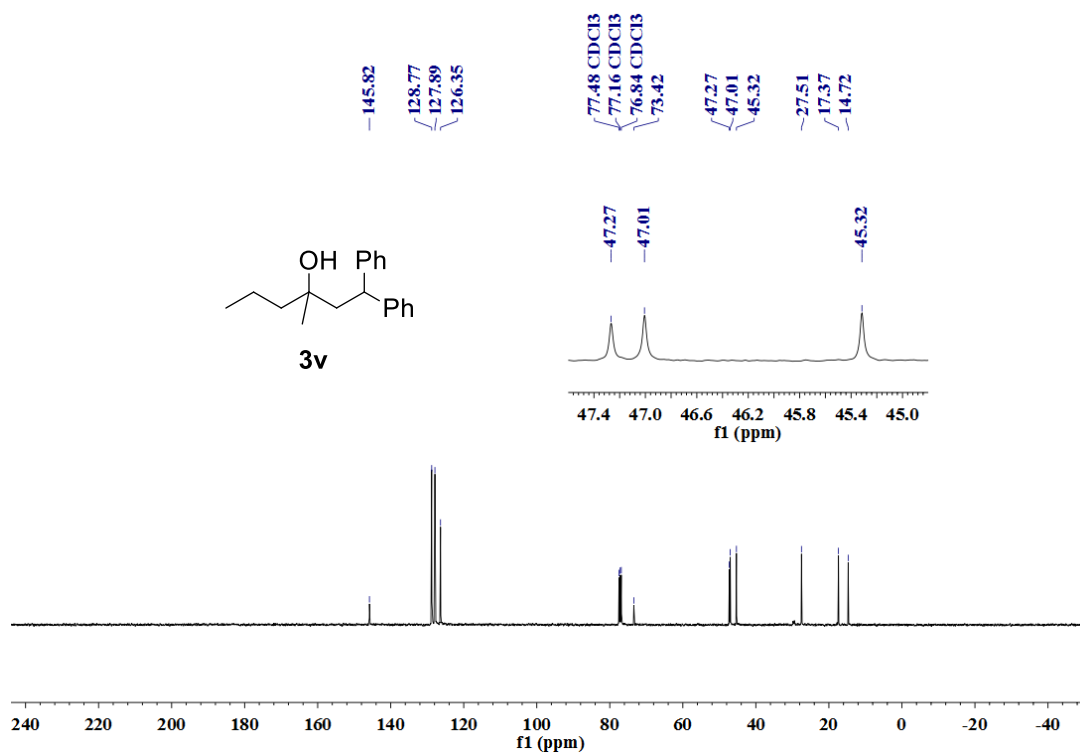

$^1\text{H}$  NMR (400 MHz,  $\text{CDCl}_3$ ):

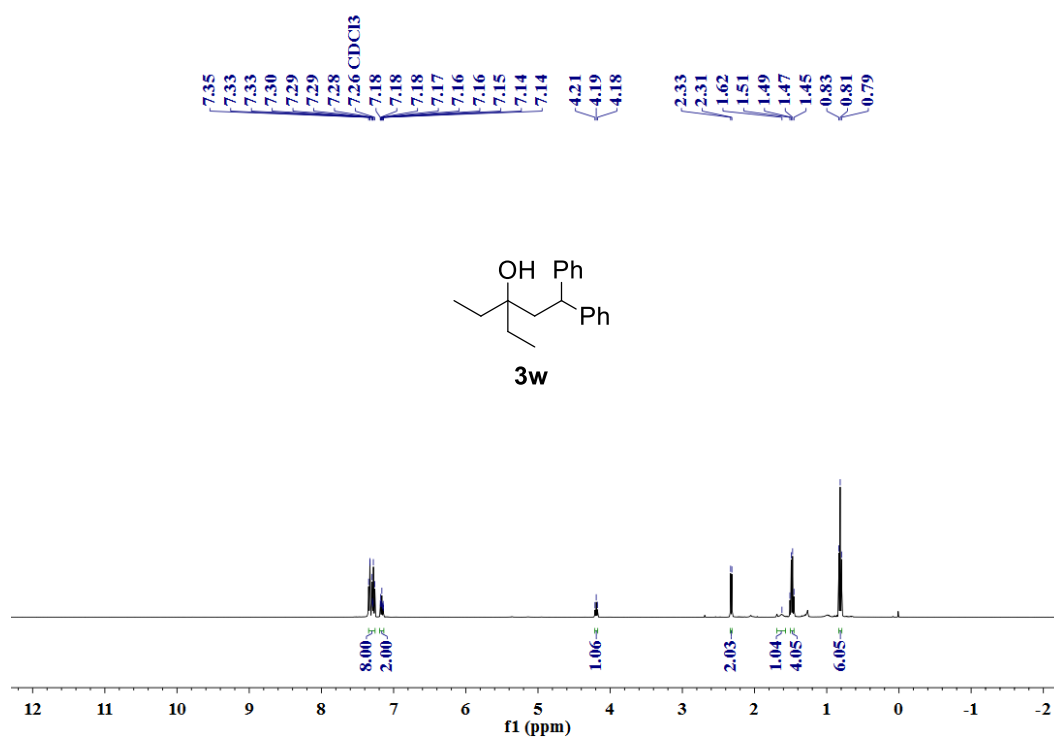

$^{13}\text{C}$  NMR (100 MHz,  $\text{CDCl}_3$ ):

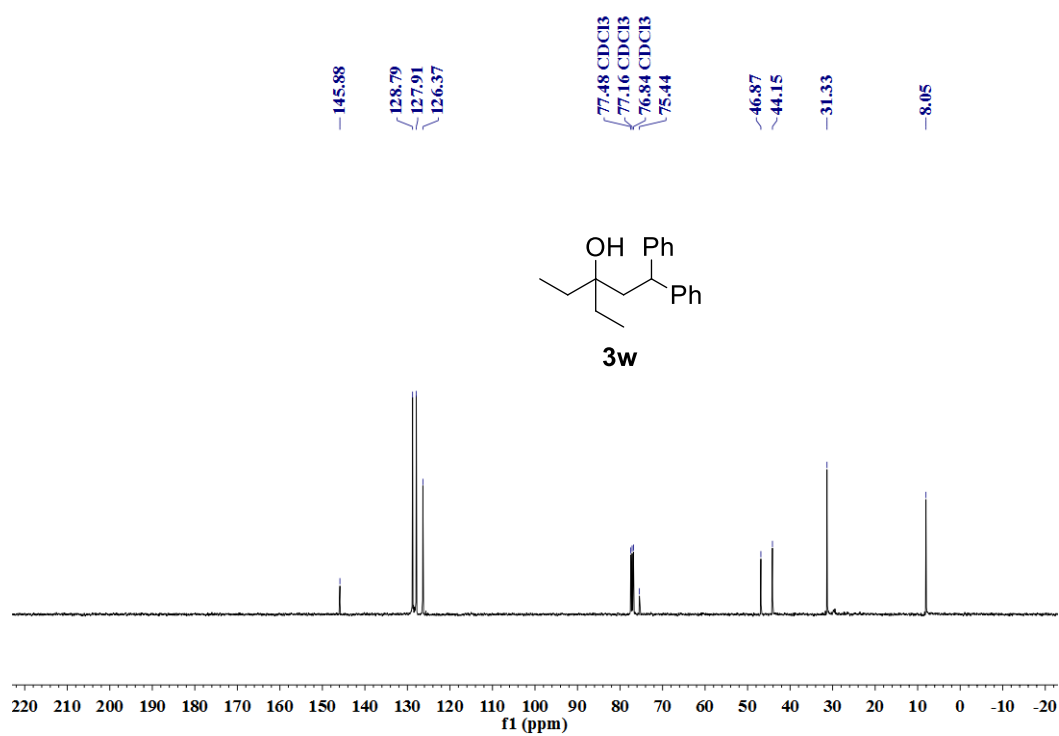

$^1\text{H}$  NMR (400 MHz,  $\text{CDCl}_3$ ):

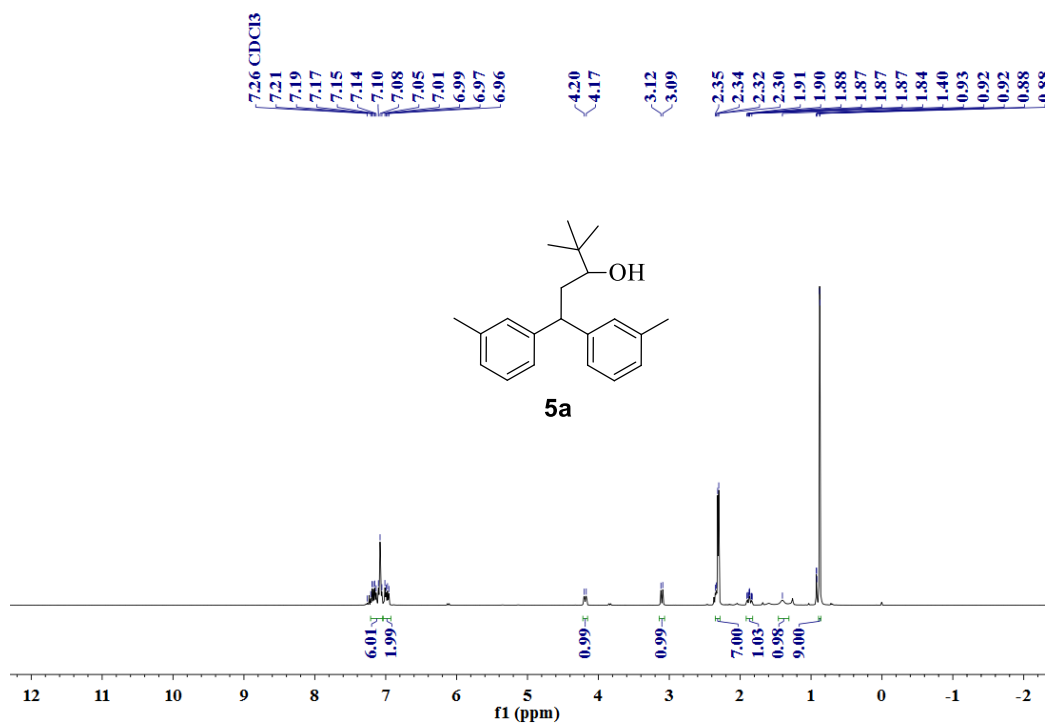



$^{13}\text{C}$  NMR (100 MHz,  $\text{CDCl}_3$ ):

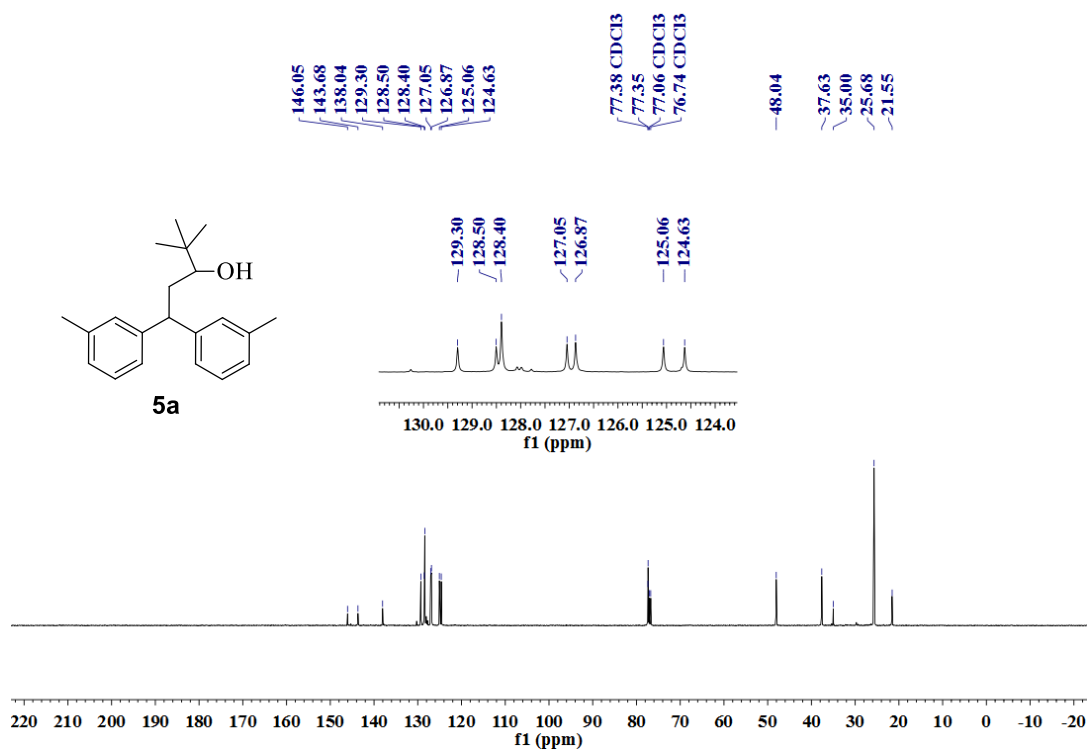

$^1\text{H}$  NMR (400 MHz,  $\text{CDCl}_3$ ):

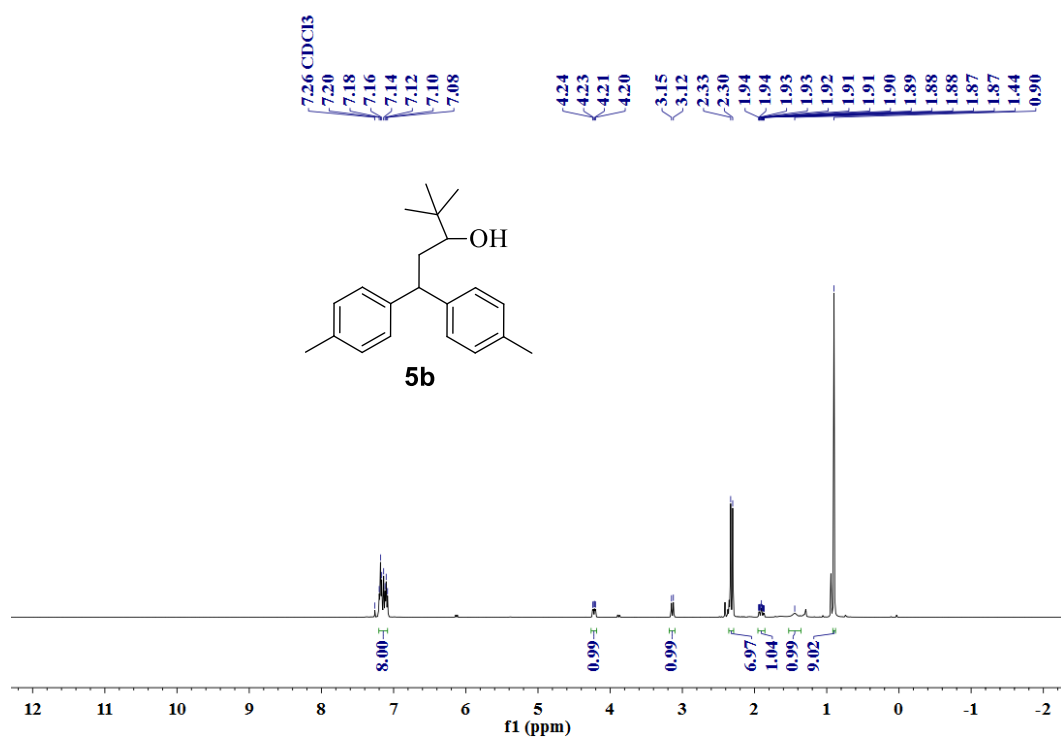

$^{13}\text{C}$  NMR (100 MHz,  $\text{CDCl}_3$ ):

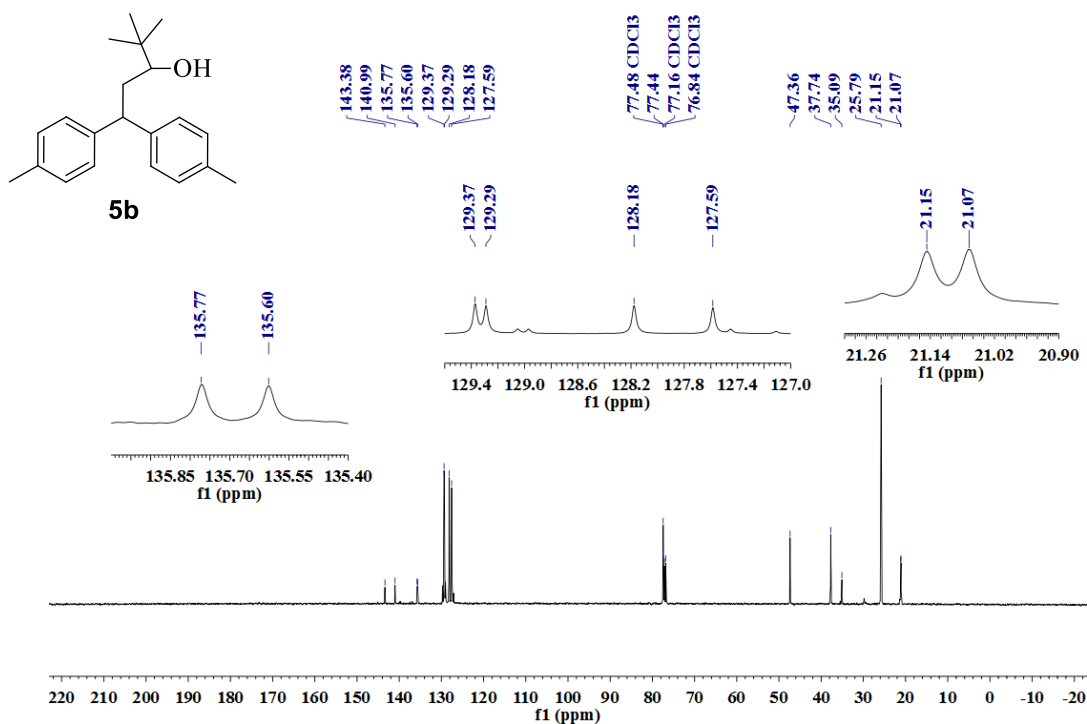

$^1\text{H}$  NMR (400 MHz,  $\text{CDCl}_3$ ):

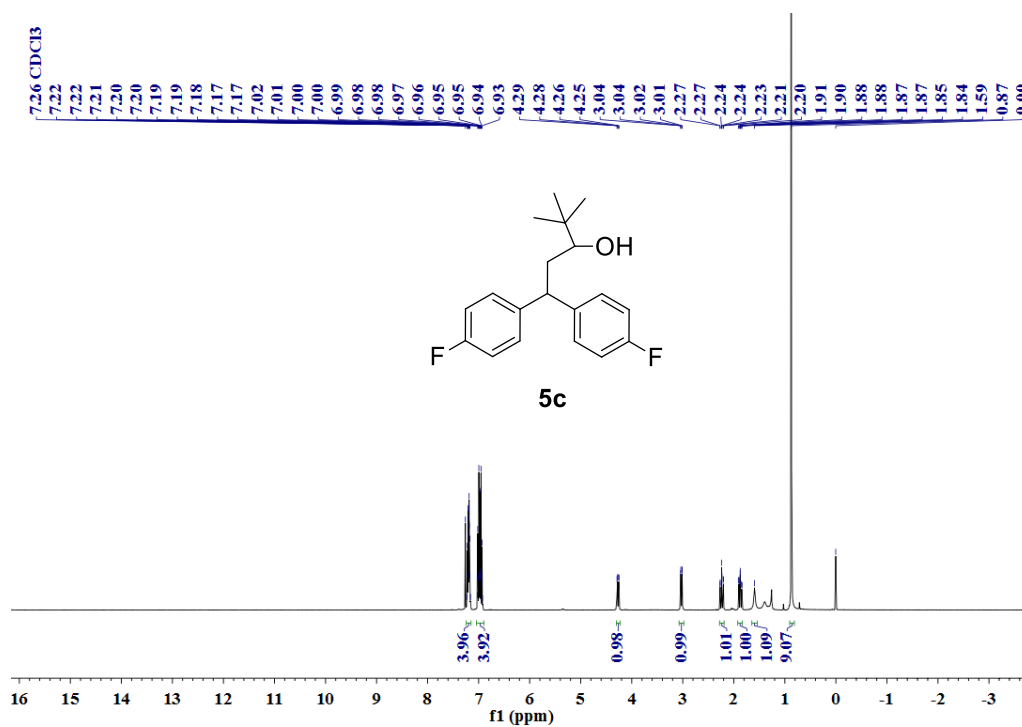

$^{13}\text{C}$  NMR (100 MHz,  $\text{CDCl}_3$ ):

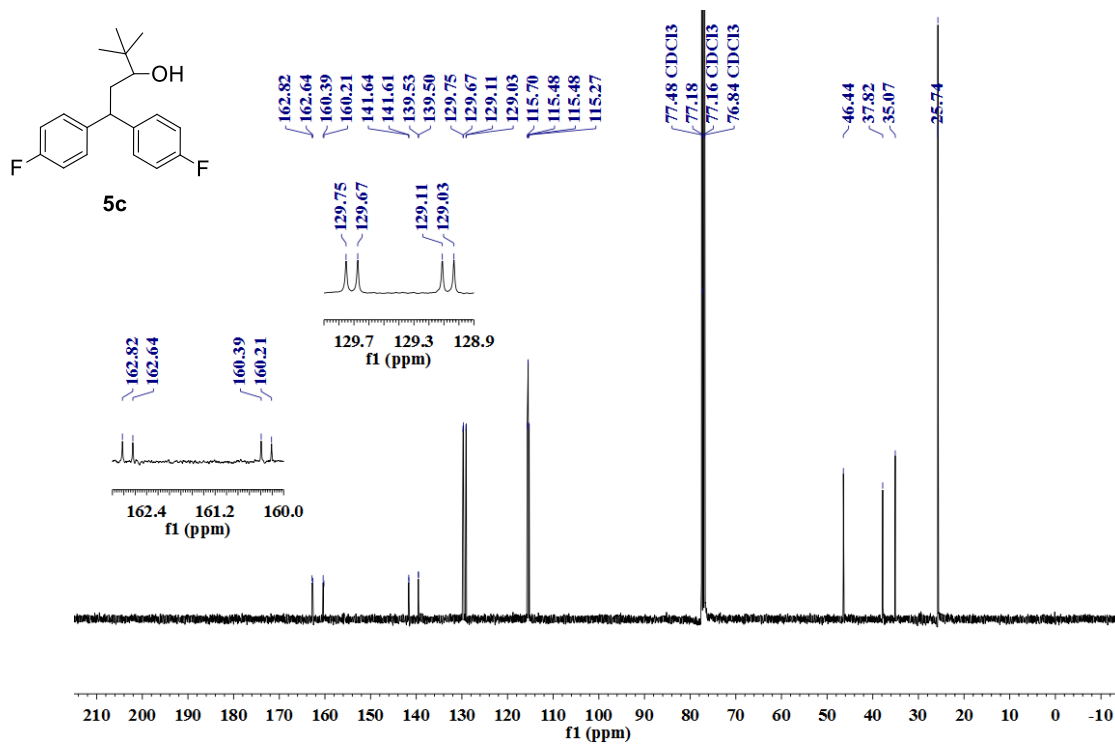

$^{19}\text{F}$  NMR (376 MHz,  $\text{CDCl}_3$ ):

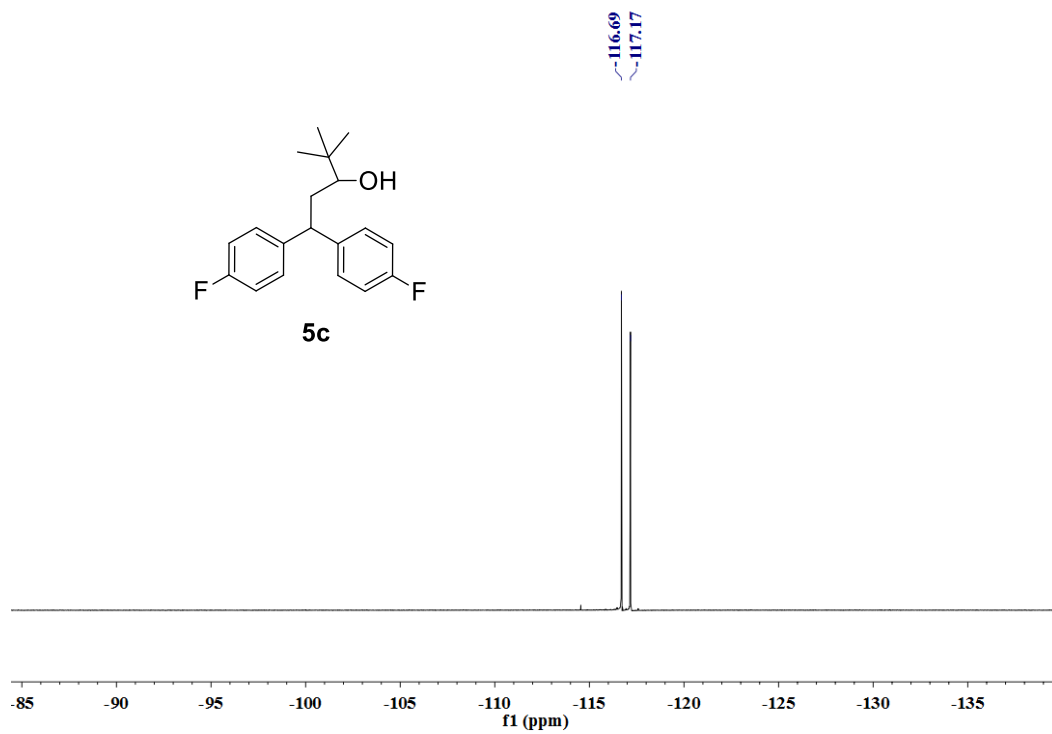

$^1\text{H}$  NMR (400 MHz,  $\text{CDCl}_3$ ):

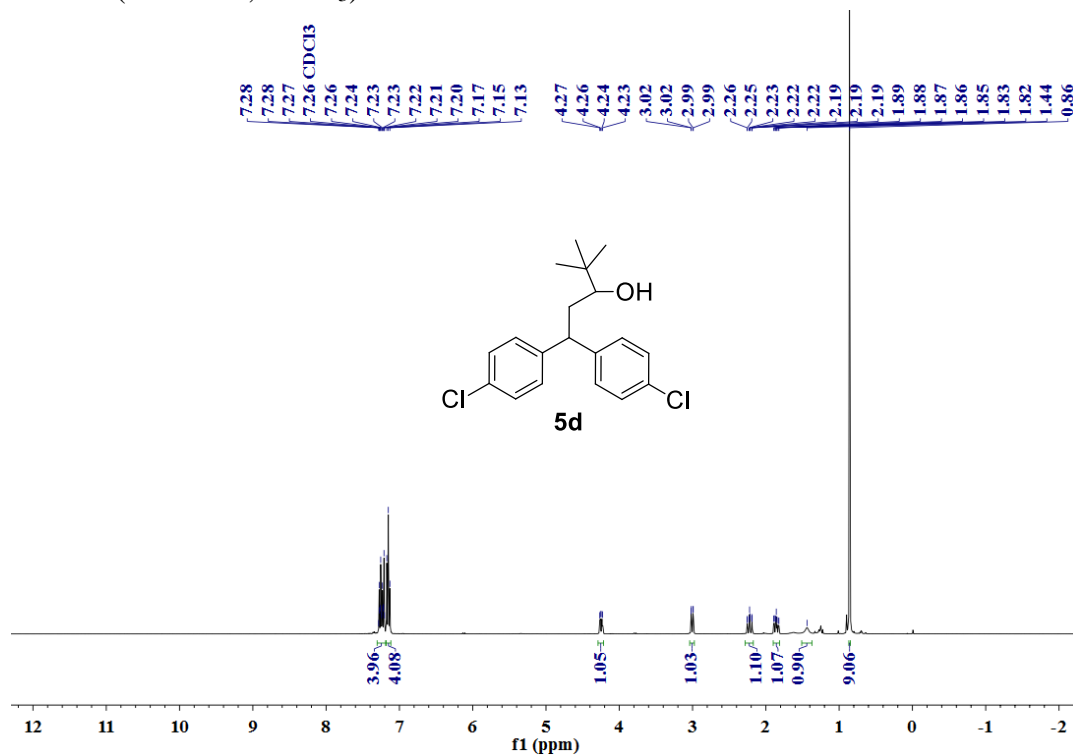

$^{13}\text{C}$  NMR (100 MHz,  $\text{CDCl}_3$ ):

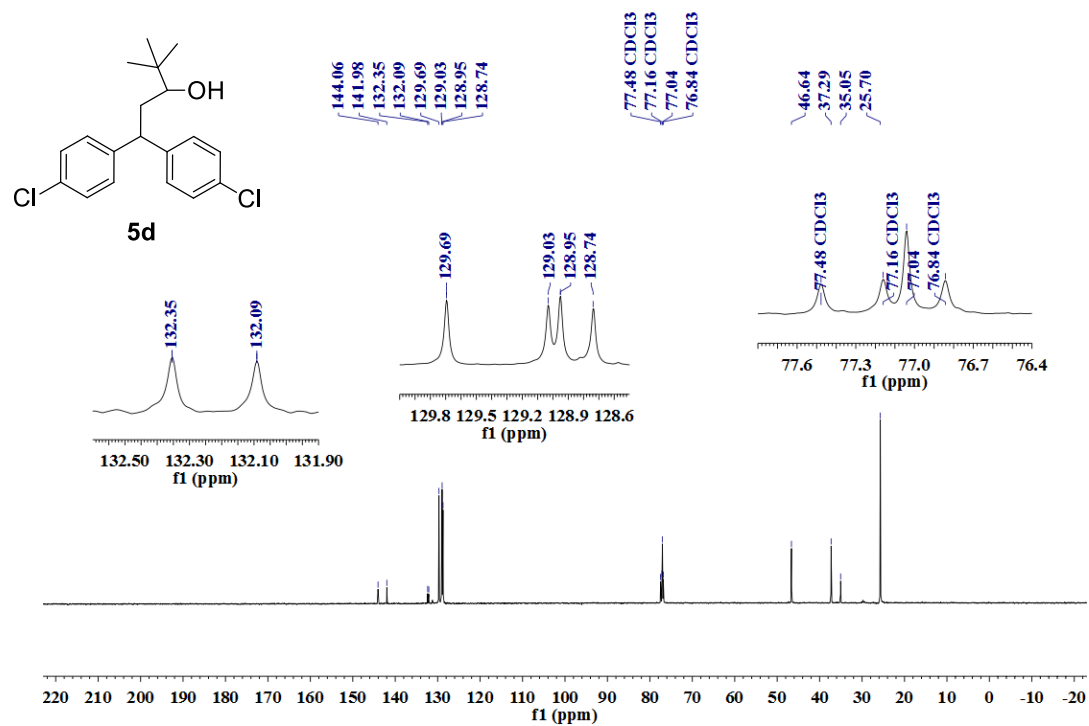

$^1\text{H}$  NMR (400 MHz,  $\text{CDCl}_3$ ):

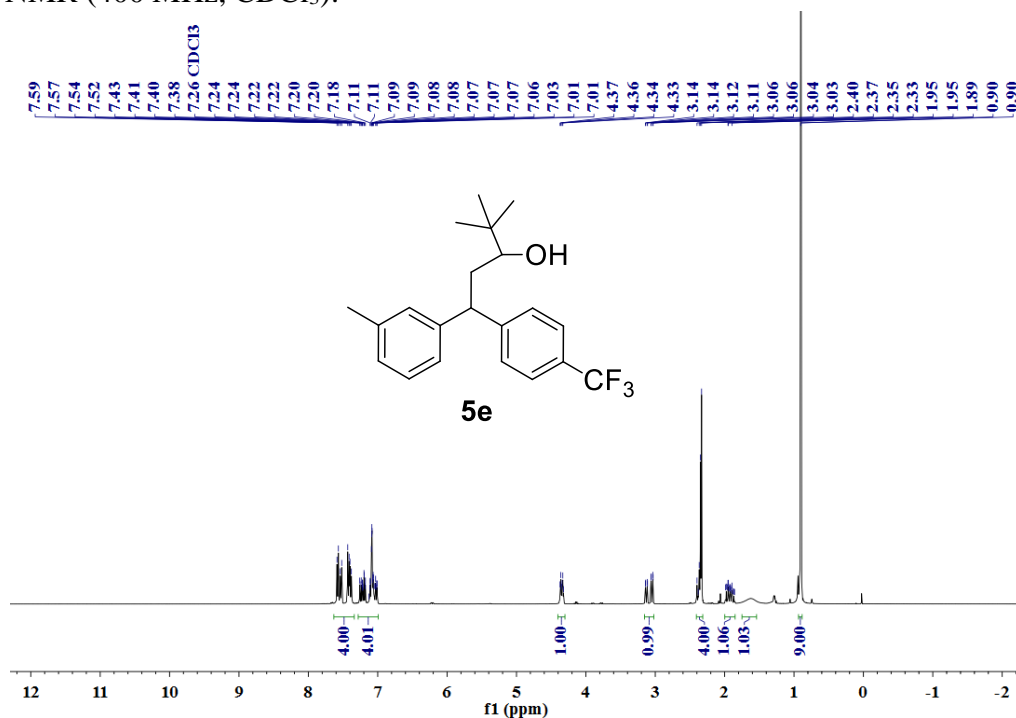

$^{13}\text{C}$  NMR (100 MHz,  $\text{CDCl}_3$ ):

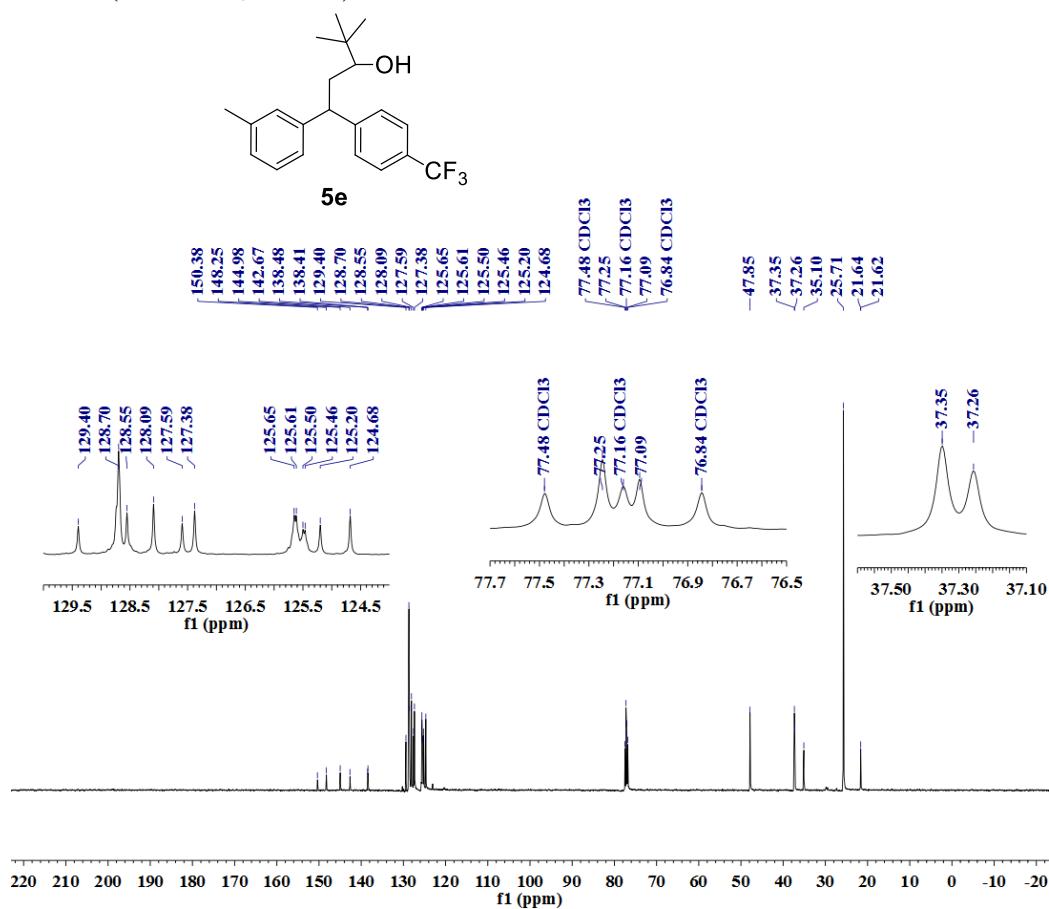

$^{19}\text{F}$  NMR (376 MHz,  $\text{CDCl}_3$ ):

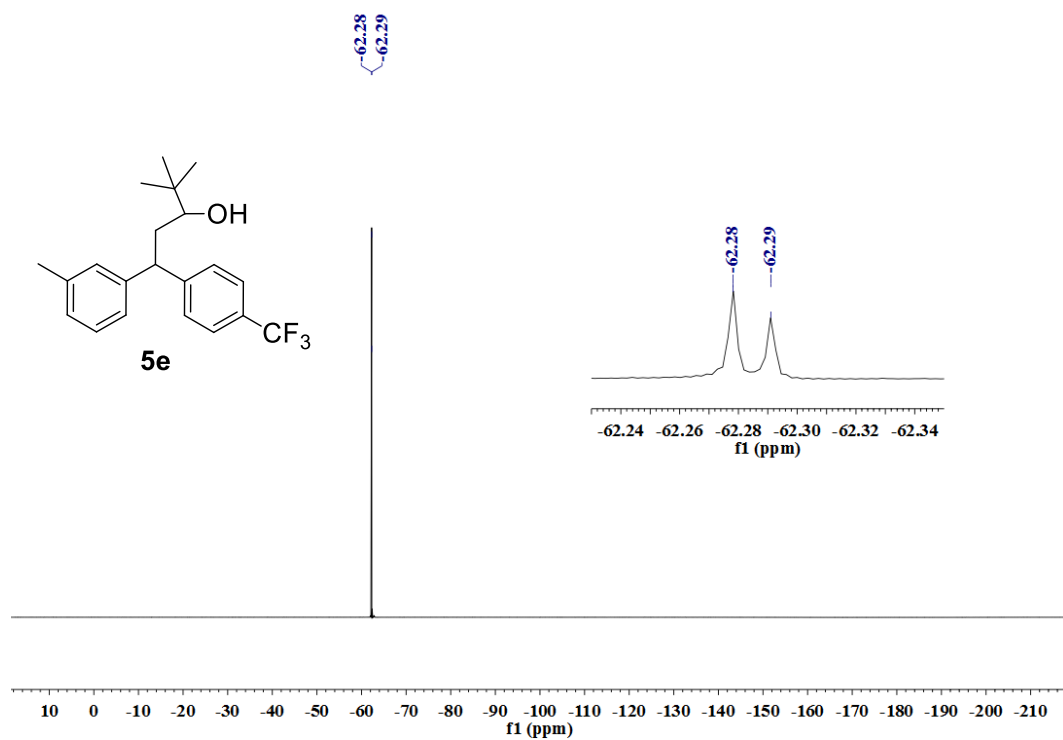

$^1\text{H}$  NMR (400 MHz,  $\text{CDCl}_3$ ):

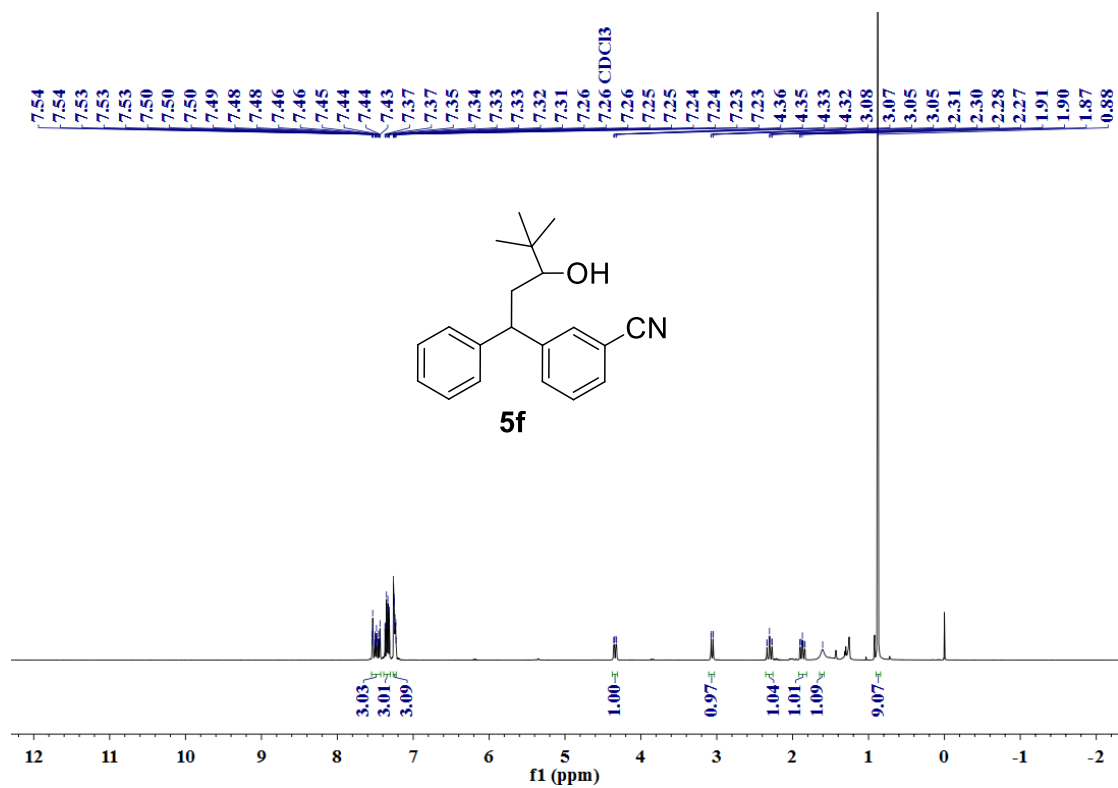

$^{13}\text{C}$  NMR (100 MHz,  $\text{CDCl}_3$ ):

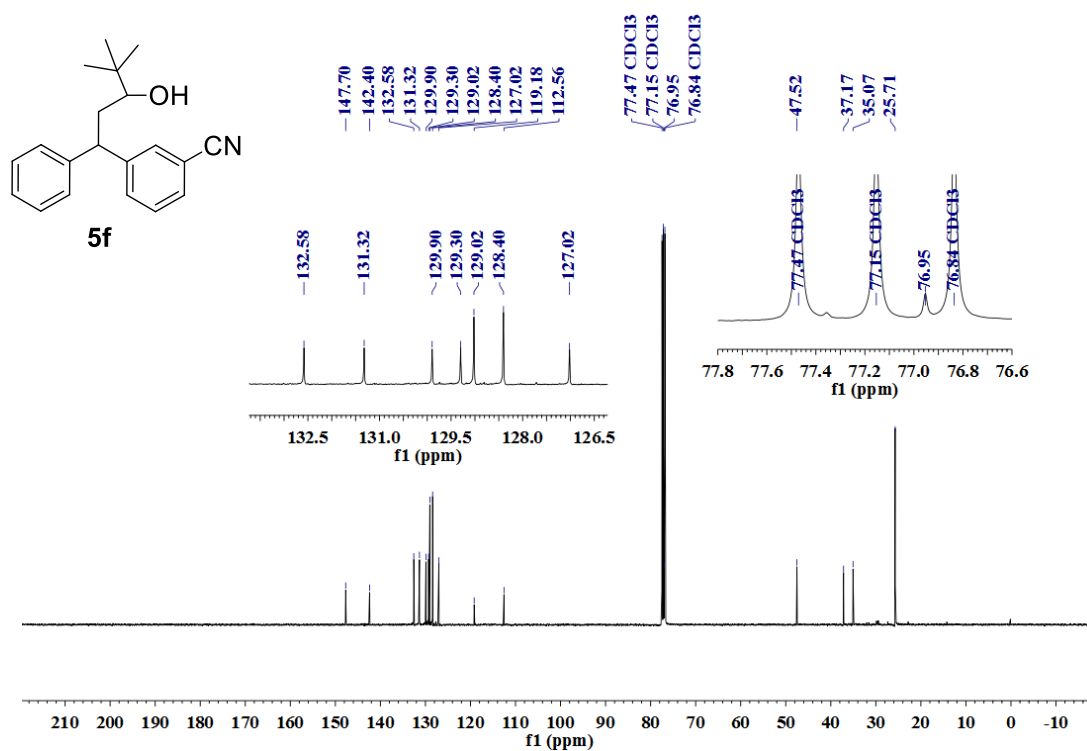

$^1\text{H}$  NMR (400 MHz,  $\text{CDCl}_3$ ):

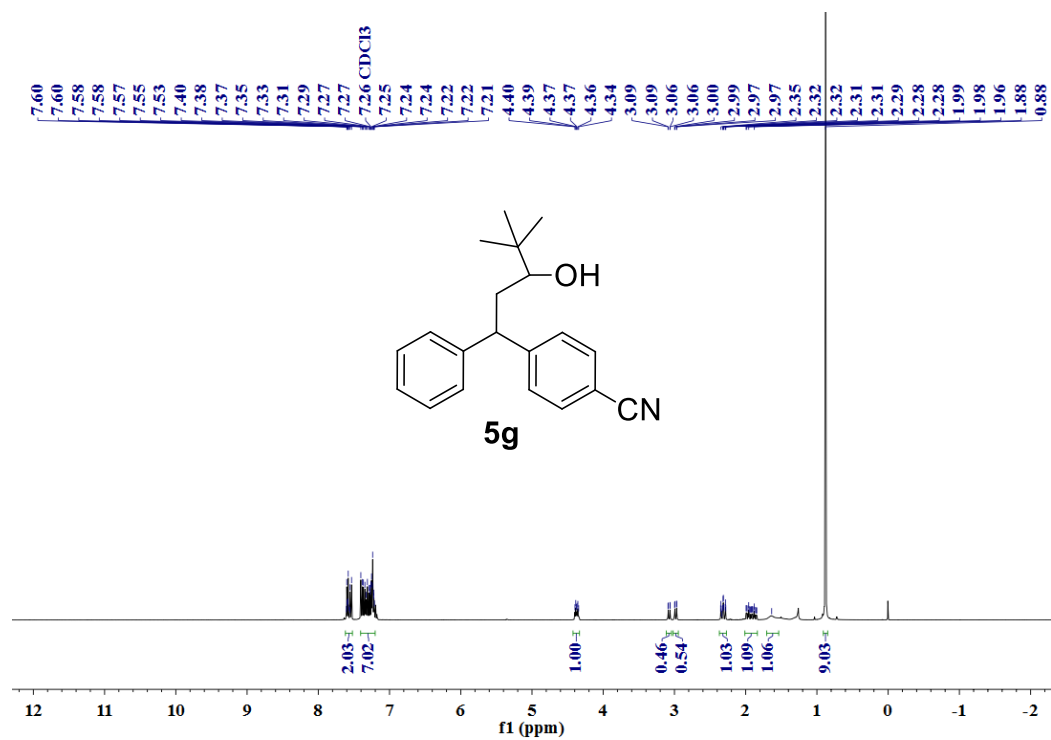

$^{13}\text{C}$  NMR (100 MHz,  $\text{CDCl}_3$ ):

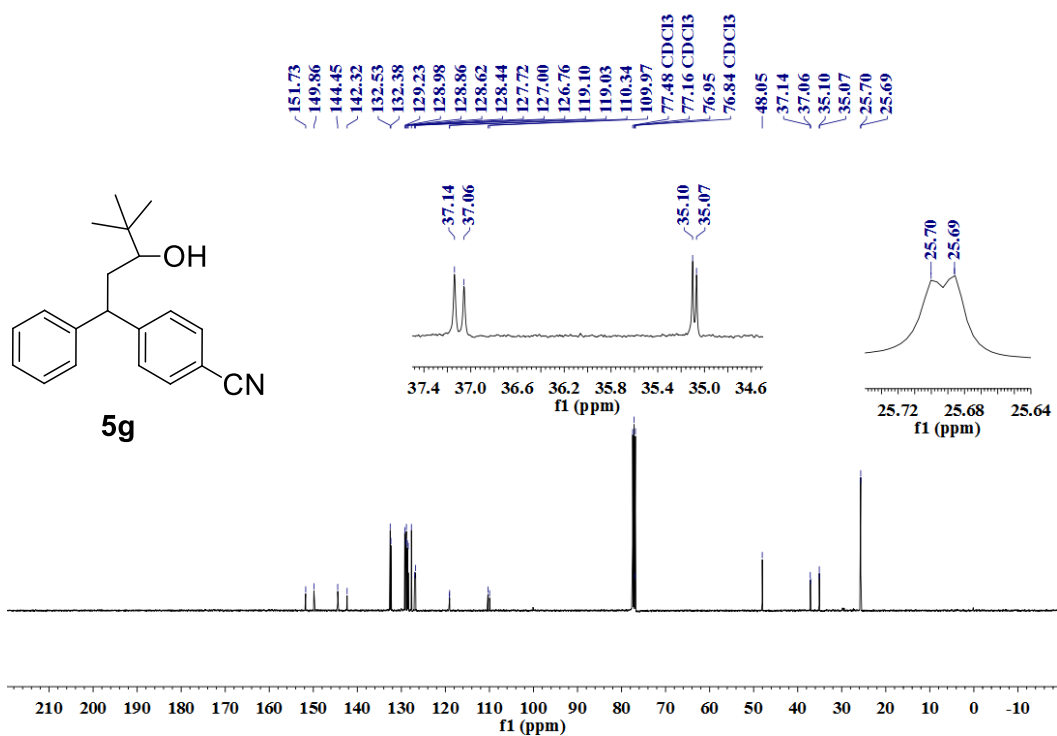

<sup>1</sup>H NMR (400 MHz, CDCl<sub>3</sub>):

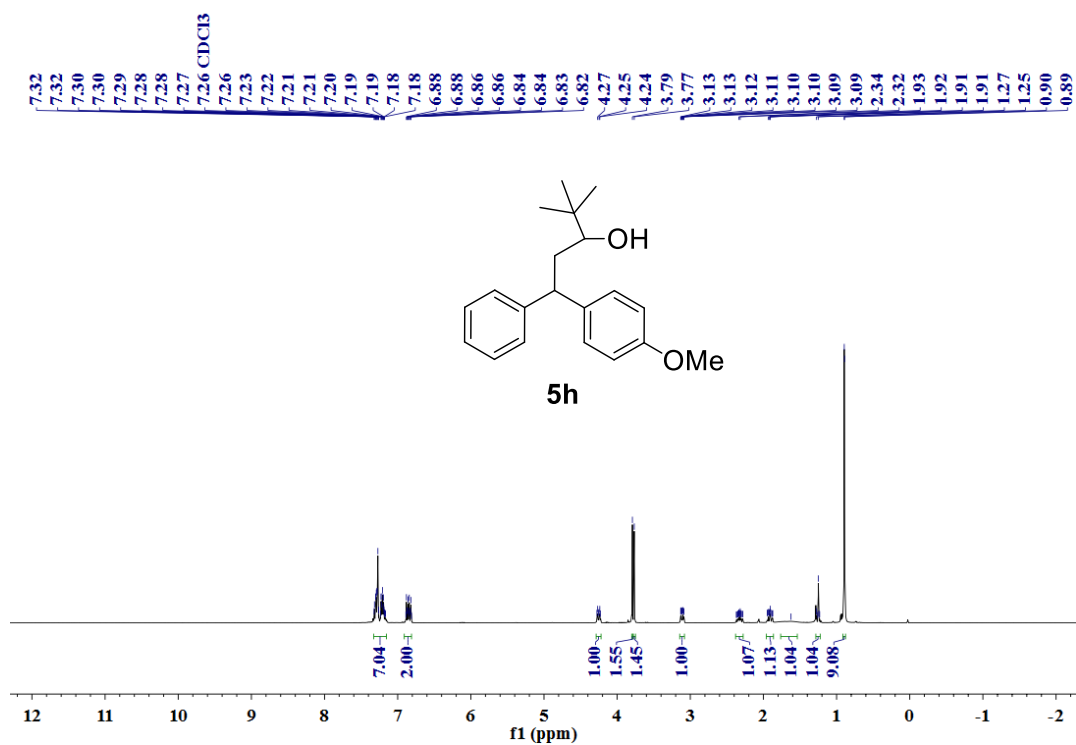



$^{13}\text{C}$  NMR (100 MHz,  $\text{CDCl}_3$ ):

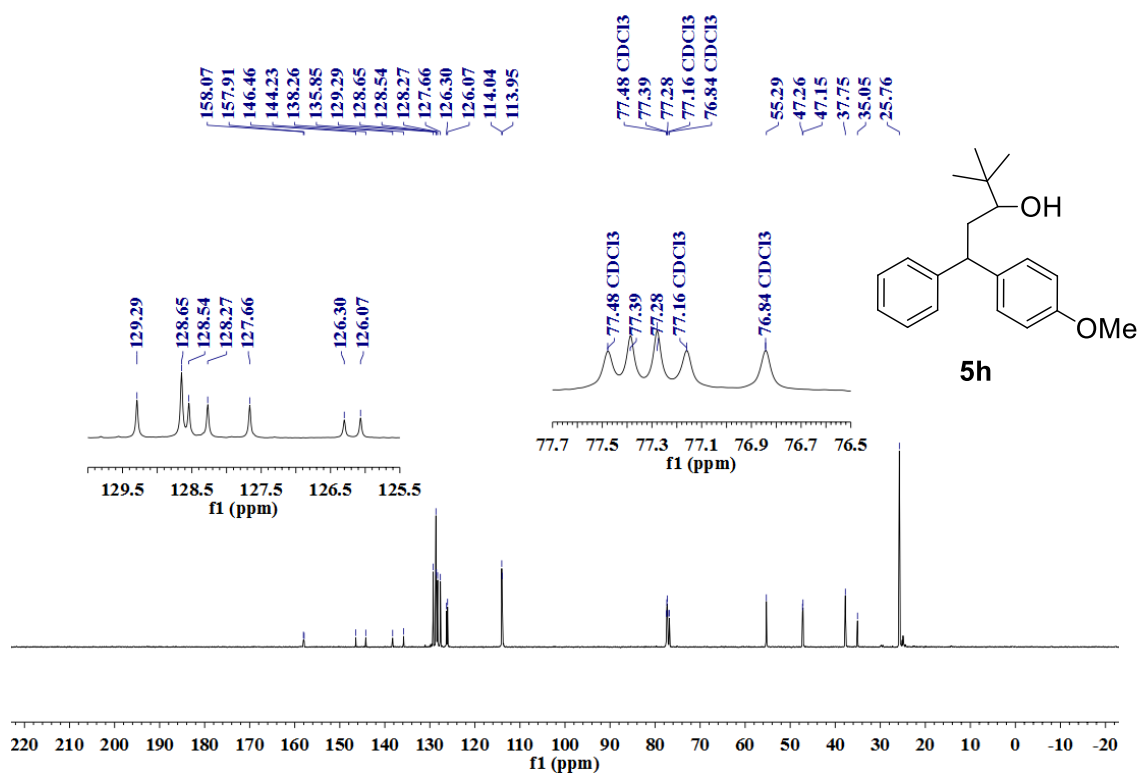

$^1\text{H}$  NMR (400 MHz,  $\text{CDCl}_3$ ):

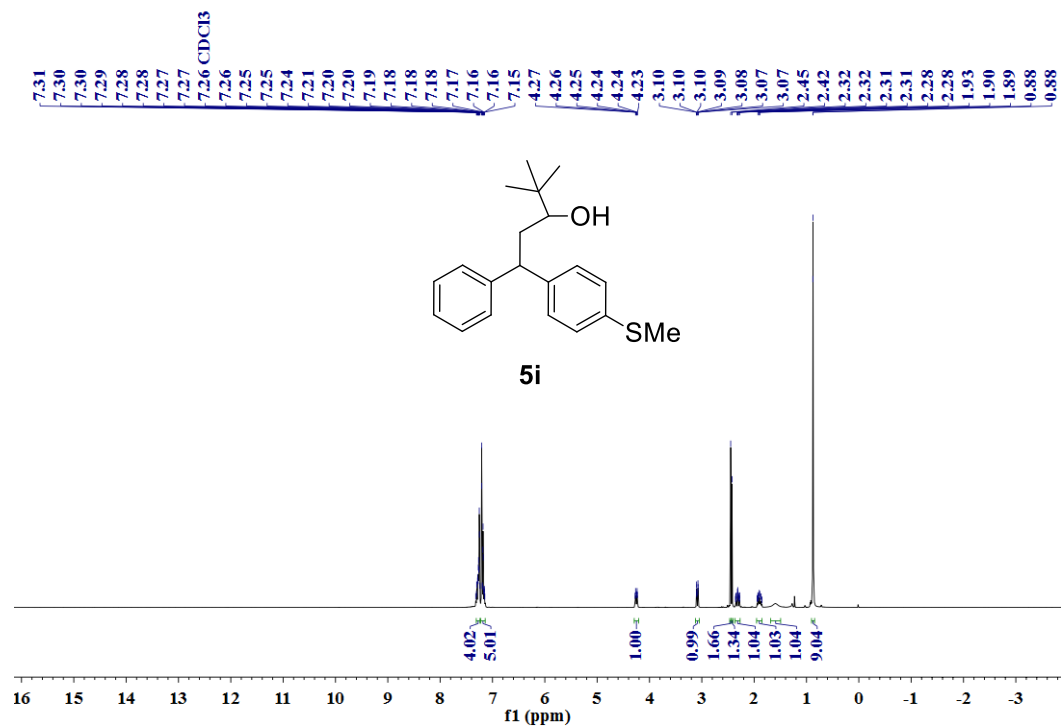

$^{13}\text{C}$  NMR (100 MHz,  $\text{CDCl}_3$ ):

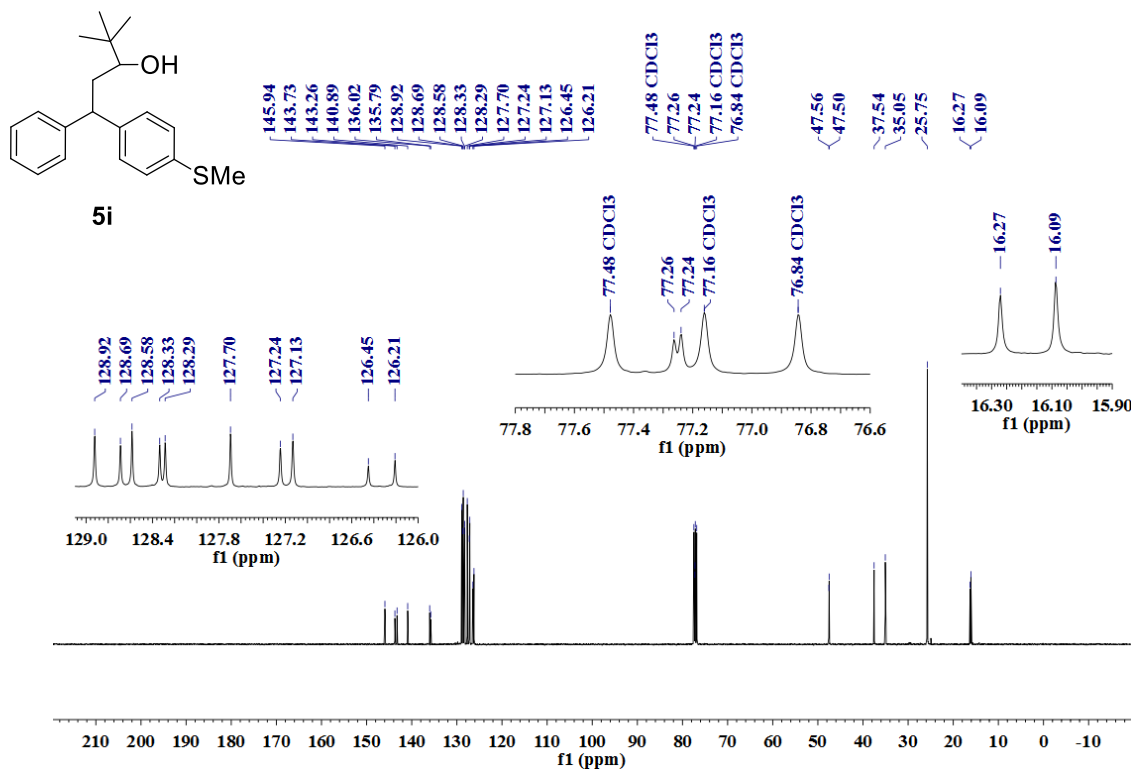

$^1\text{H}$  NMR (400 MHz,  $\text{CDCl}_3$ ):

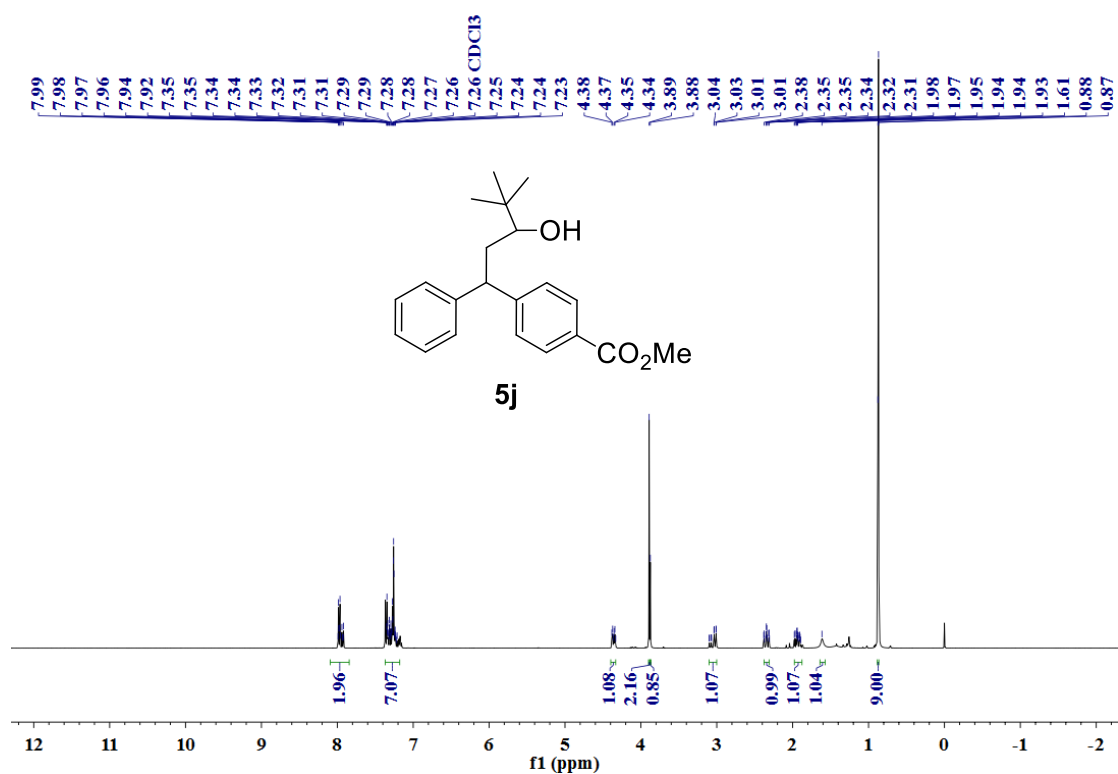

$^{13}\text{C}$  NMR (100 MHz,  $\text{CDCl}_3$ ):

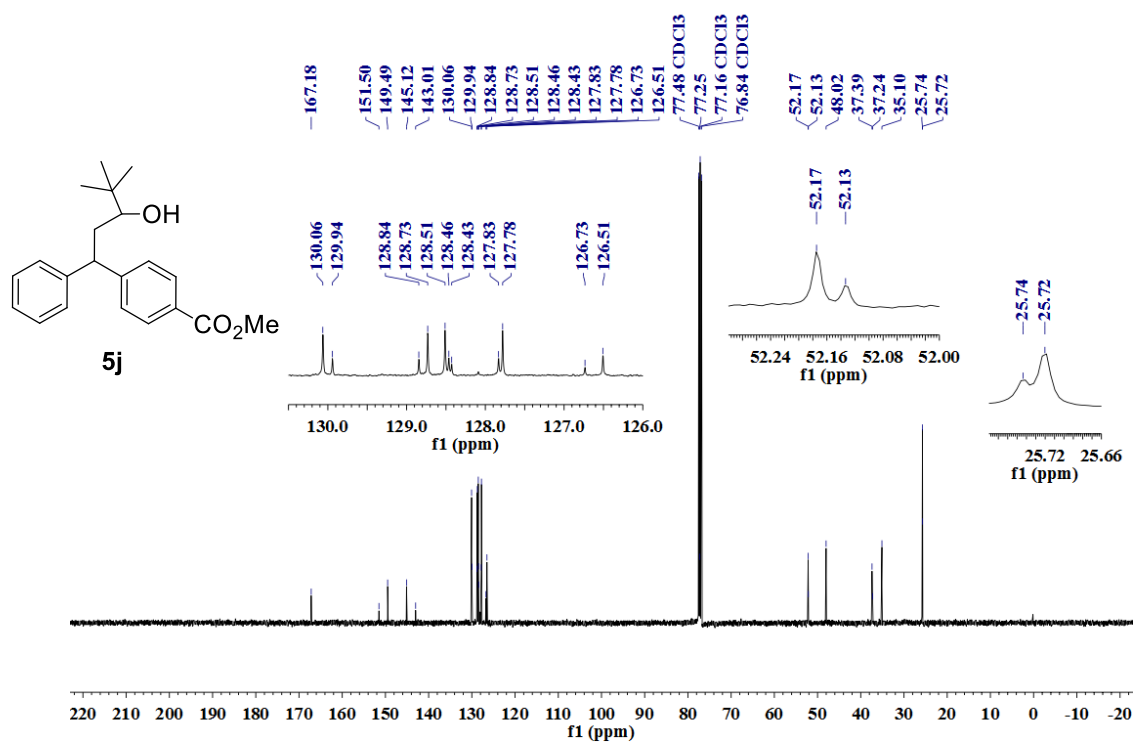

$^1\text{H}$  NMR (400 MHz,  $\text{CDCl}_3$ ):

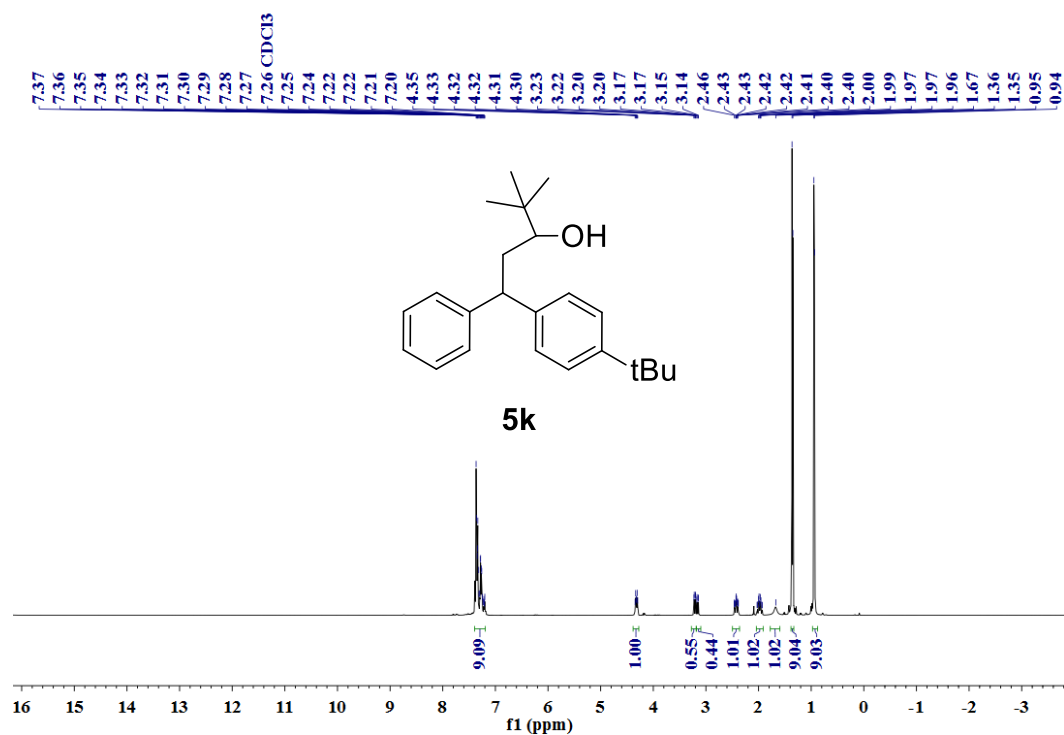

$^{13}\text{C}$  NMR (100 MHz,  $\text{CDCl}_3$ ):

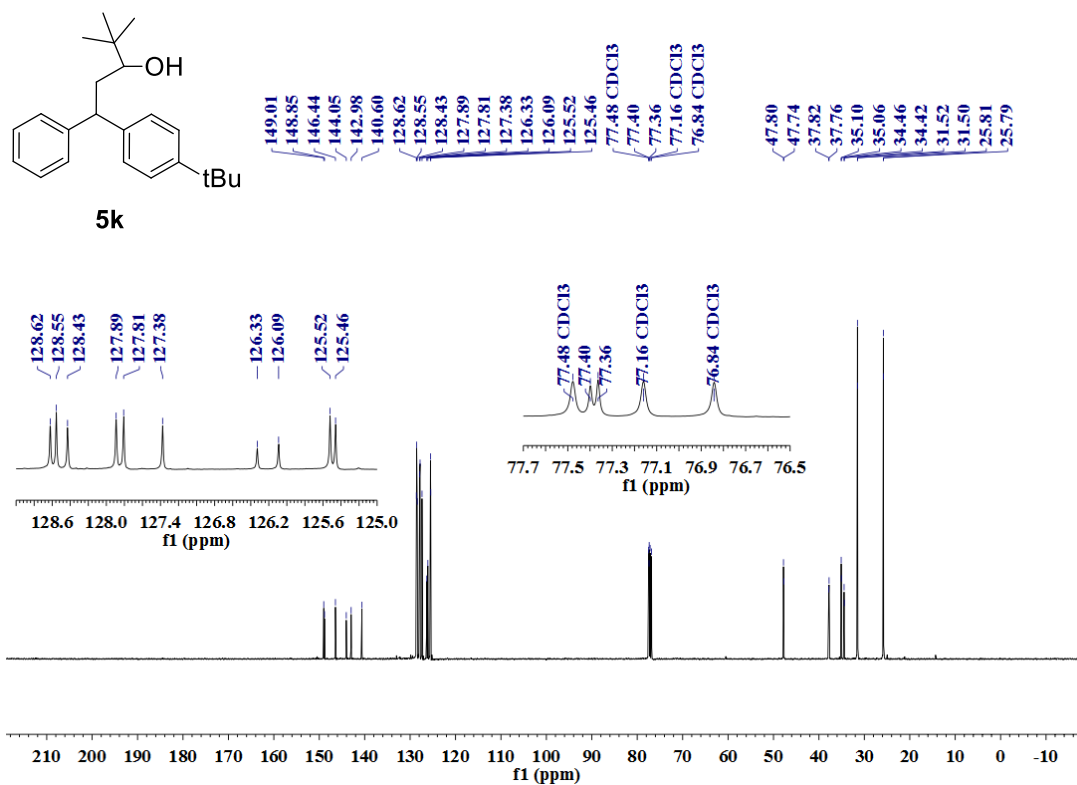

$^1\text{H}$  NMR (400 MHz,  $\text{CDCl}_3$ ):

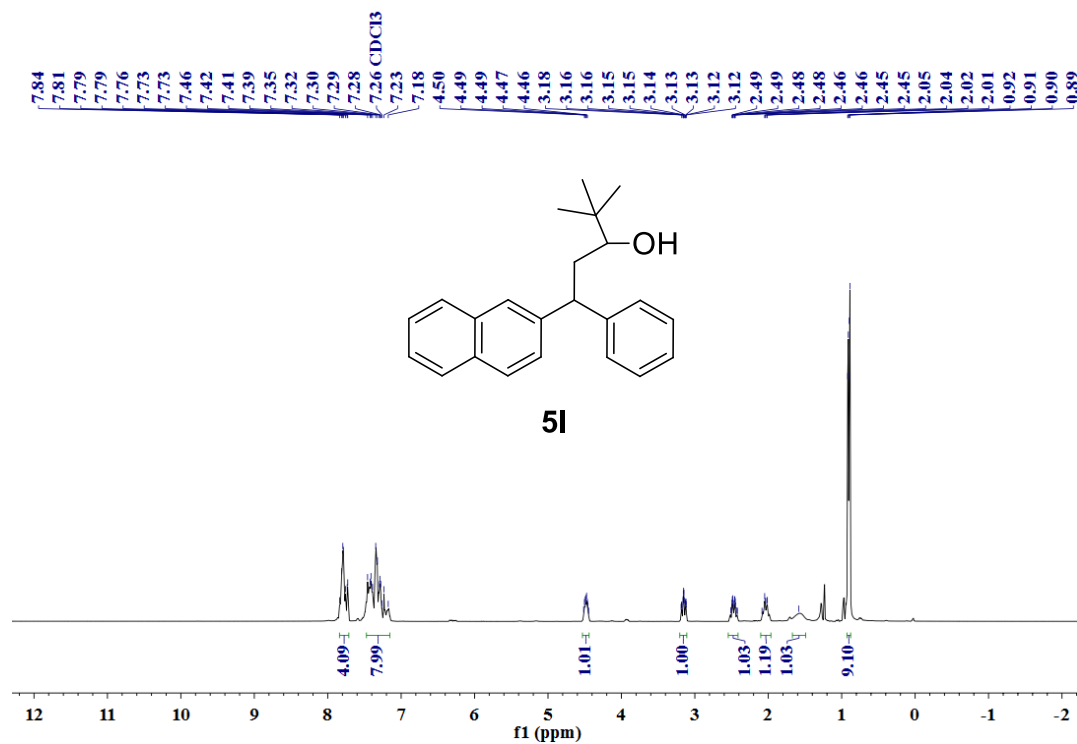

$^{13}\text{C}$  NMR (100 MHz,  $\text{CDCl}_3$ ):

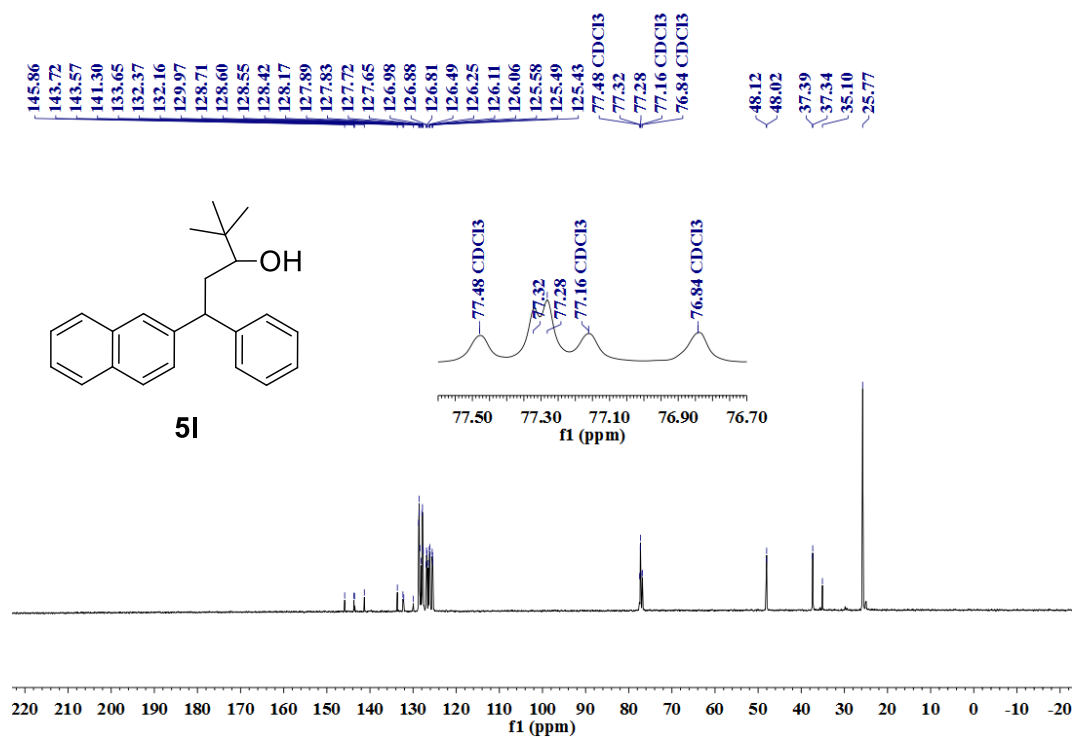

$^1\text{H}$  NMR (400 MHz,  $\text{CDCl}_3$ ):

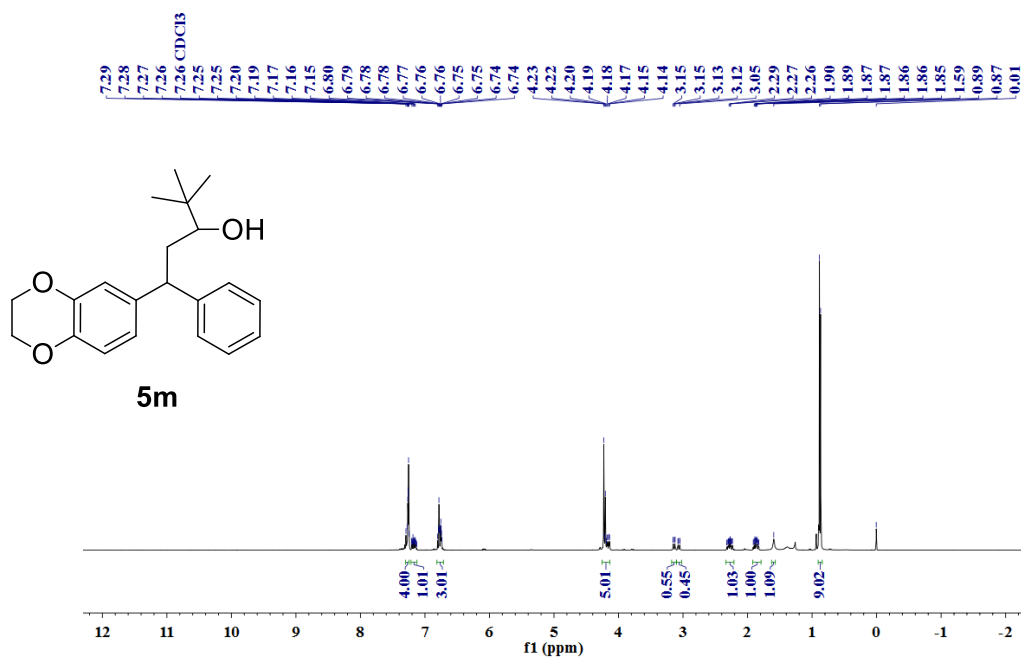

$^{13}\text{C}$  NMR (100 MHz,  $\text{CDCl}_3$ ):

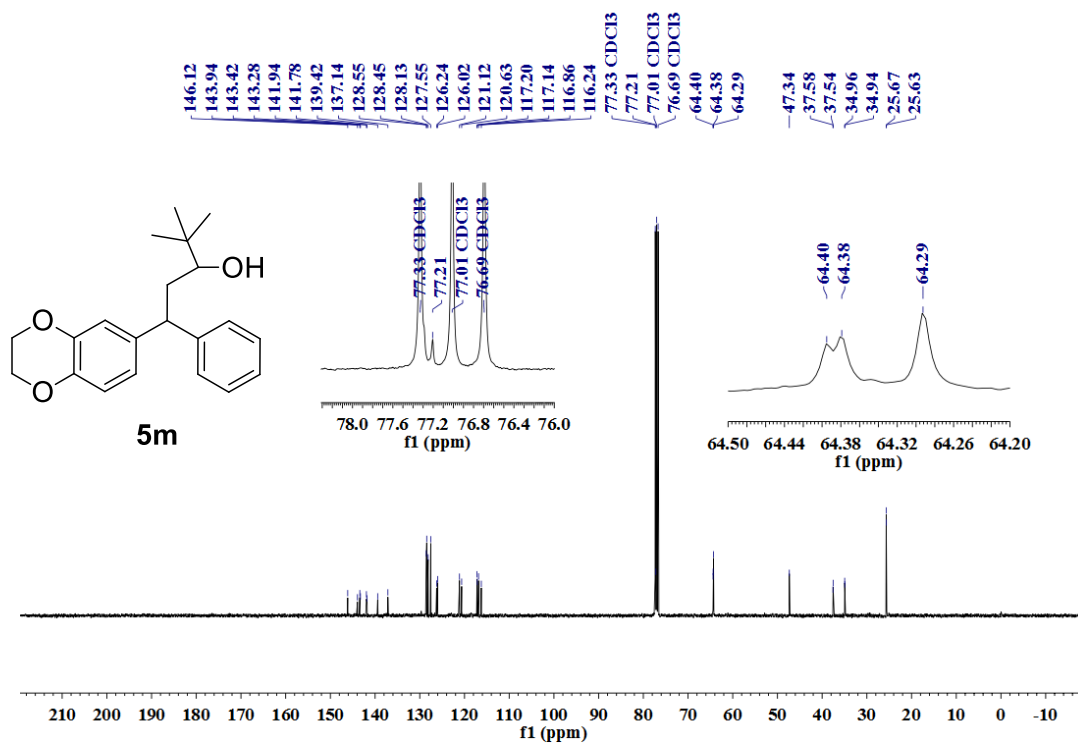

$^1\text{H}$  NMR (400 MHz,  $\text{CDCl}_3$ ):

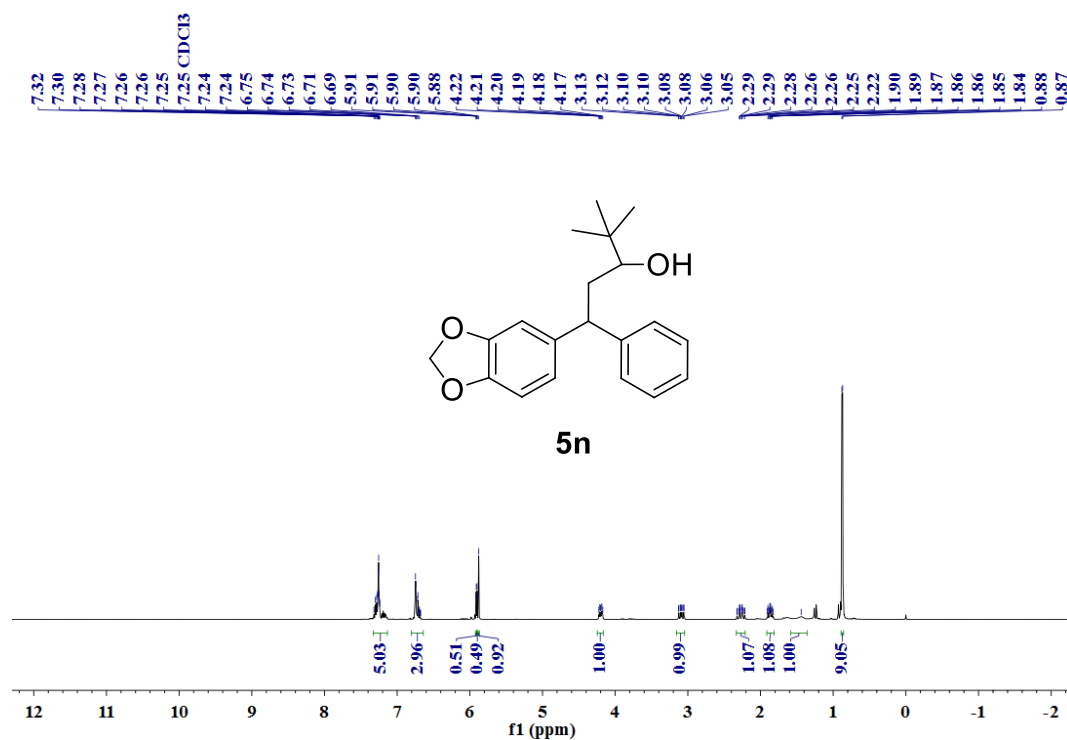

$^{13}\text{C}$  NMR (100 MHz,  $\text{CDCl}_3$ ):

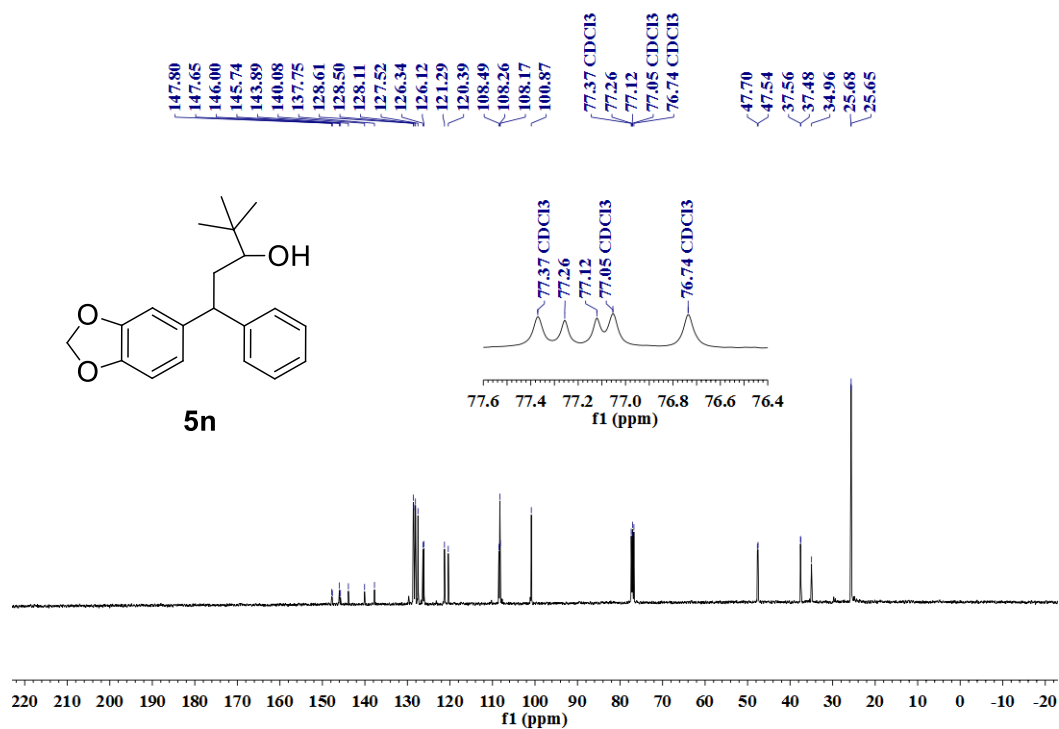

$^1\text{H}$  NMR (400 MHz,  $\text{CDCl}_3$ ):

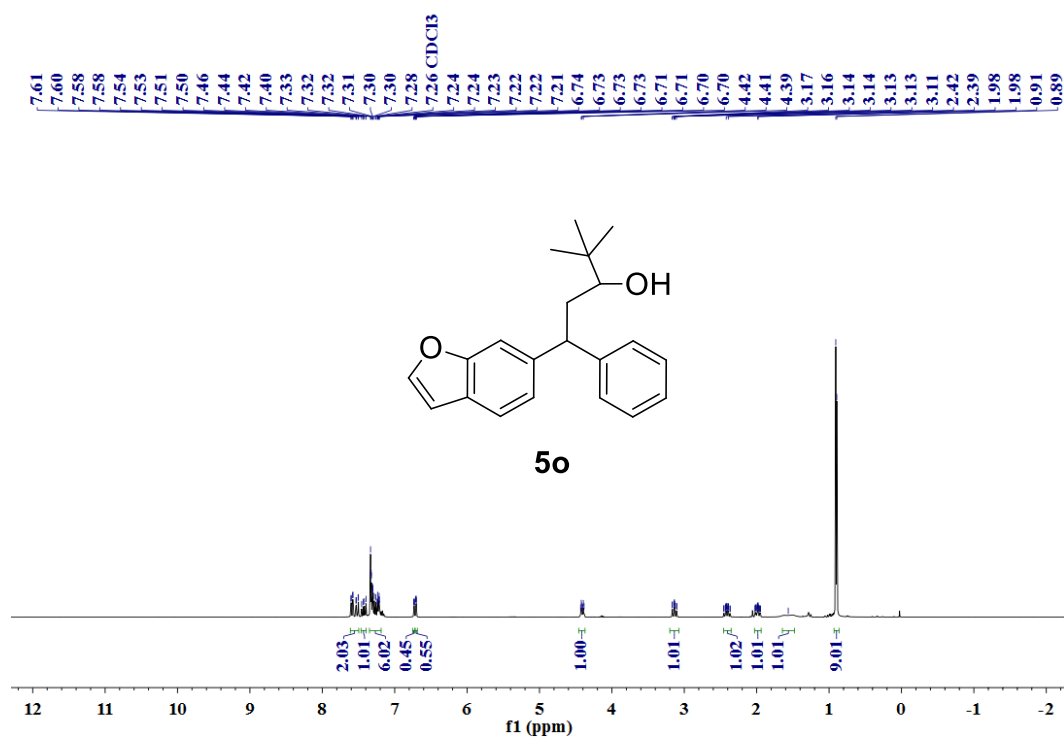

$^{13}\text{C}$  NMR (100 MHz,  $\text{CDCl}_3$ ):

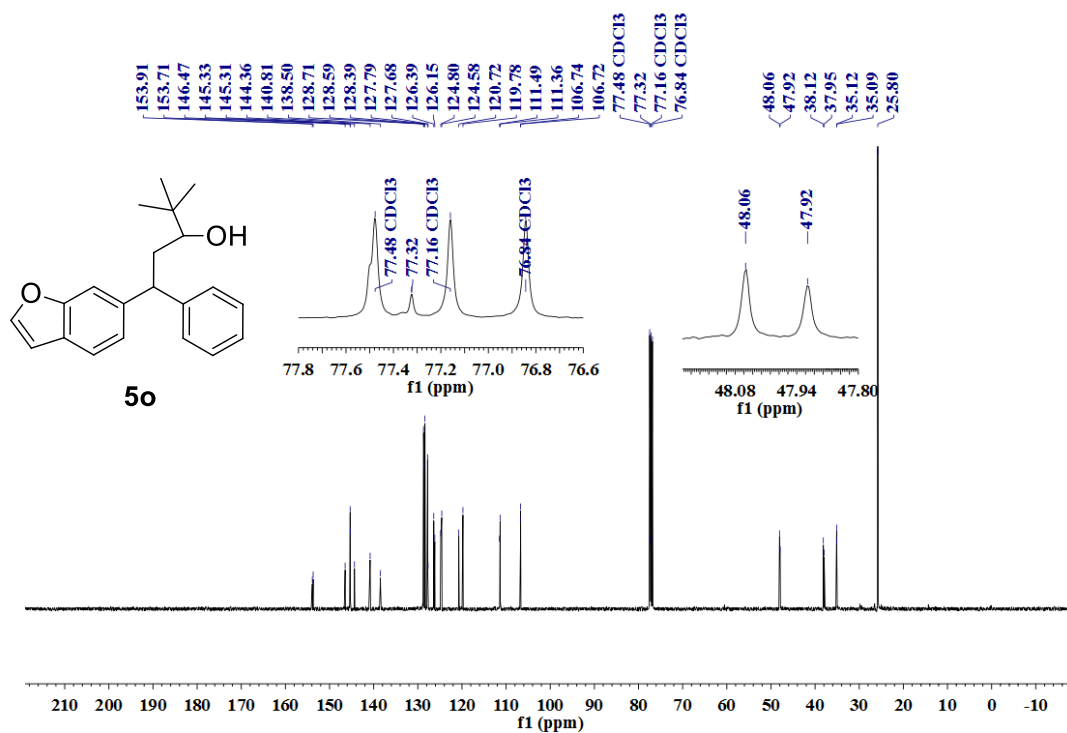

$^1\text{H}$  NMR (400 MHz,  $\text{CDCl}_3$ ):

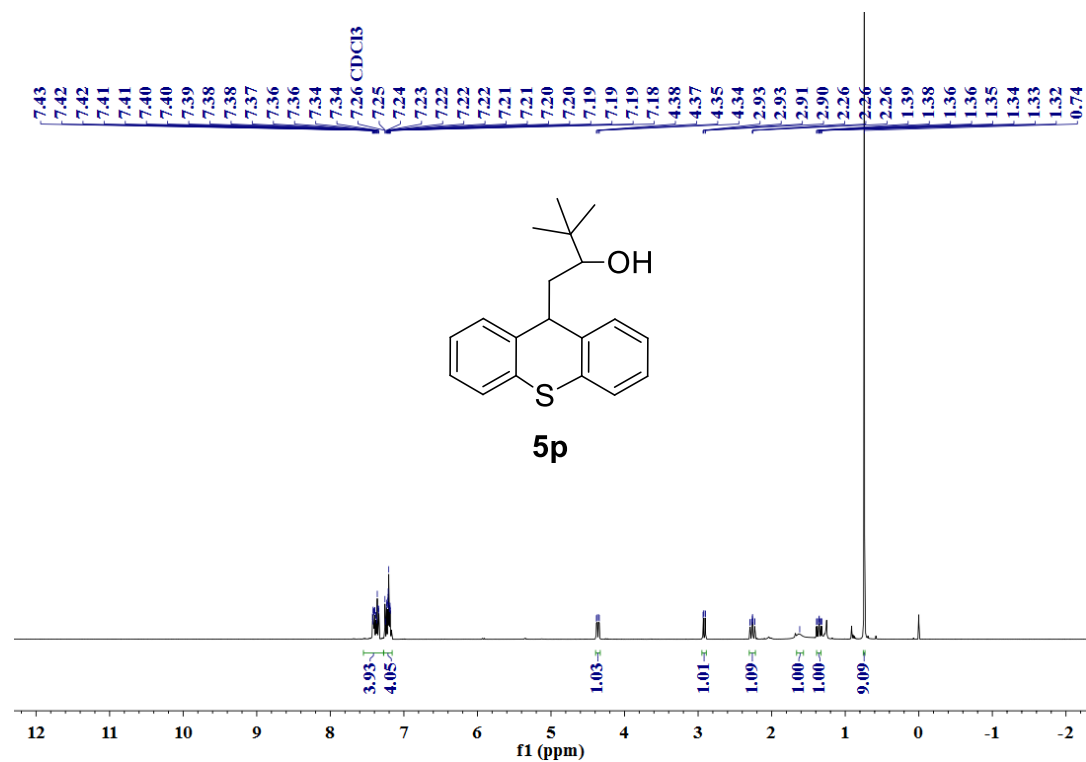



$^{13}\text{C}$  NMR (100 MHz,  $\text{CDCl}_3$ ):

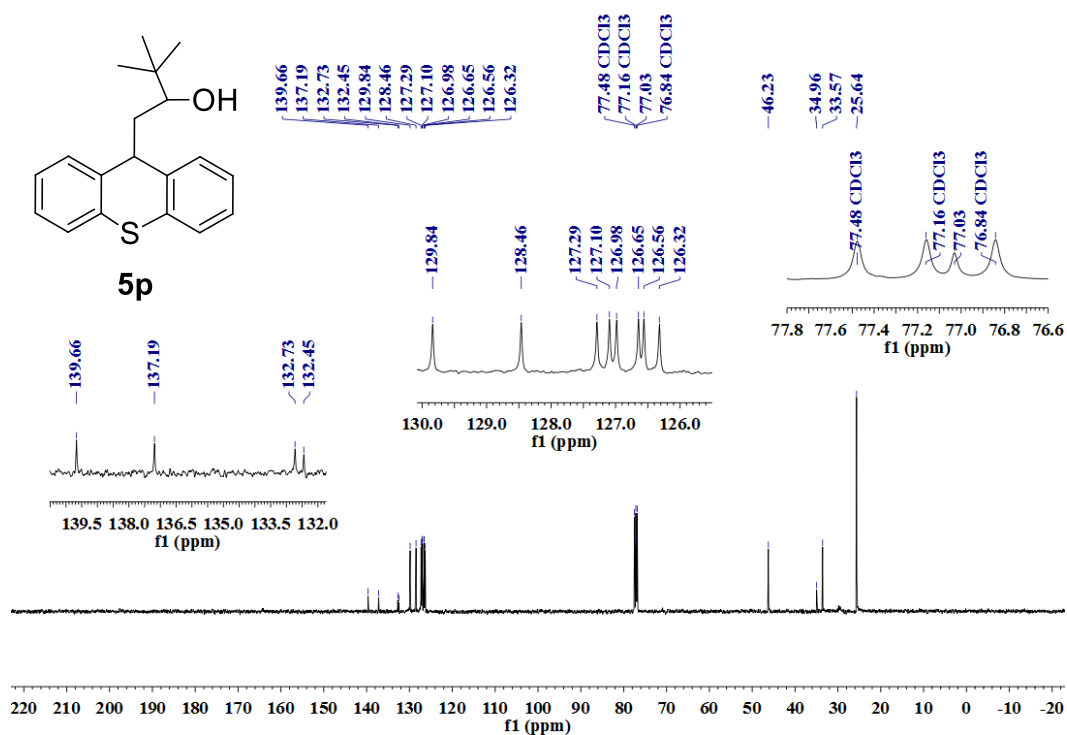

$^1\text{H}$  NMR (400 MHz,  $\text{CDCl}_3$ ):

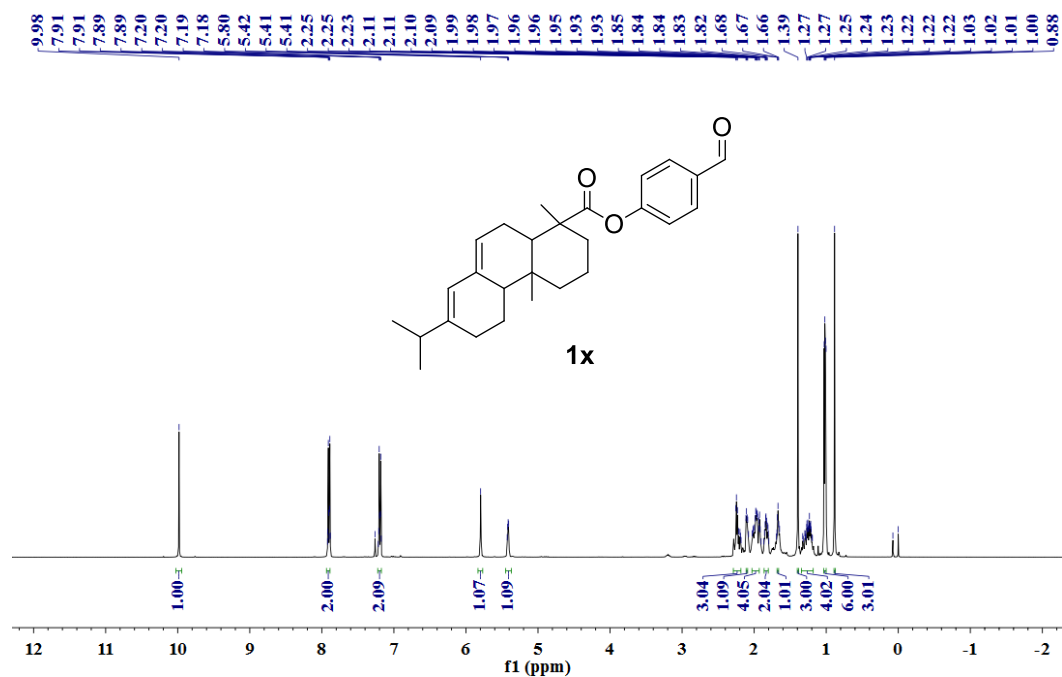

$^{13}\text{C}$  NMR (100 MHz,  $\text{CDCl}_3$ ):

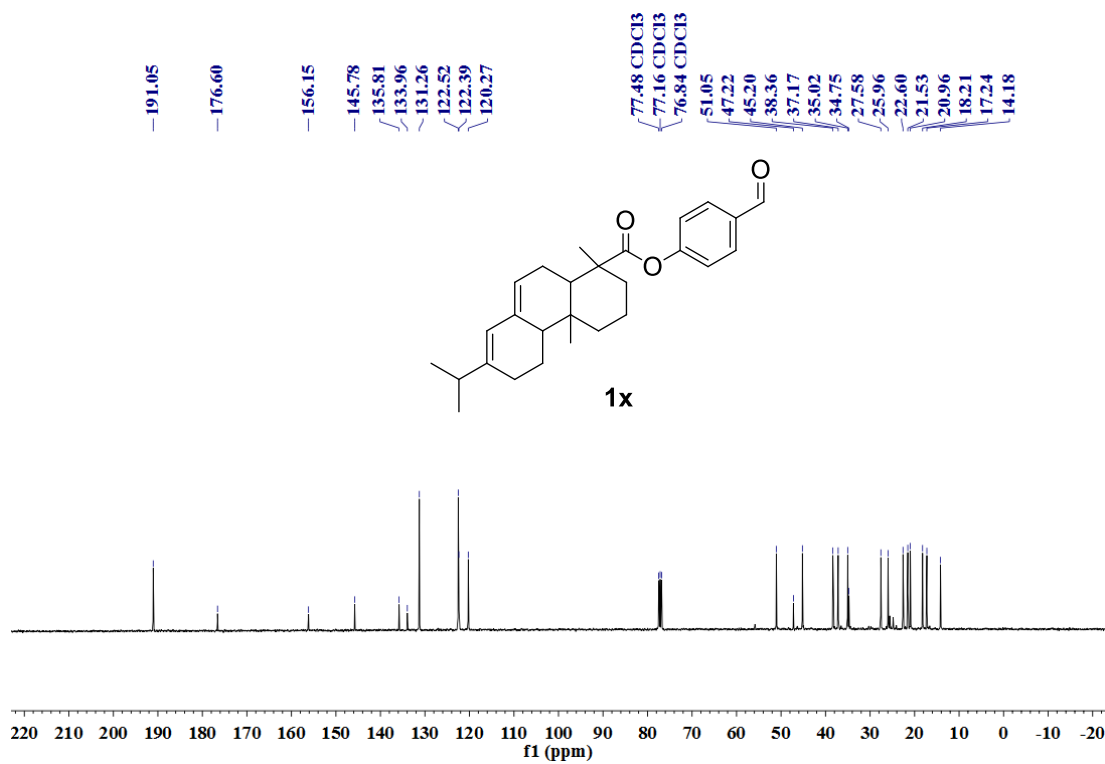

$^1\text{H}$  NMR (400 MHz,  $\text{CDCl}_3$ ):

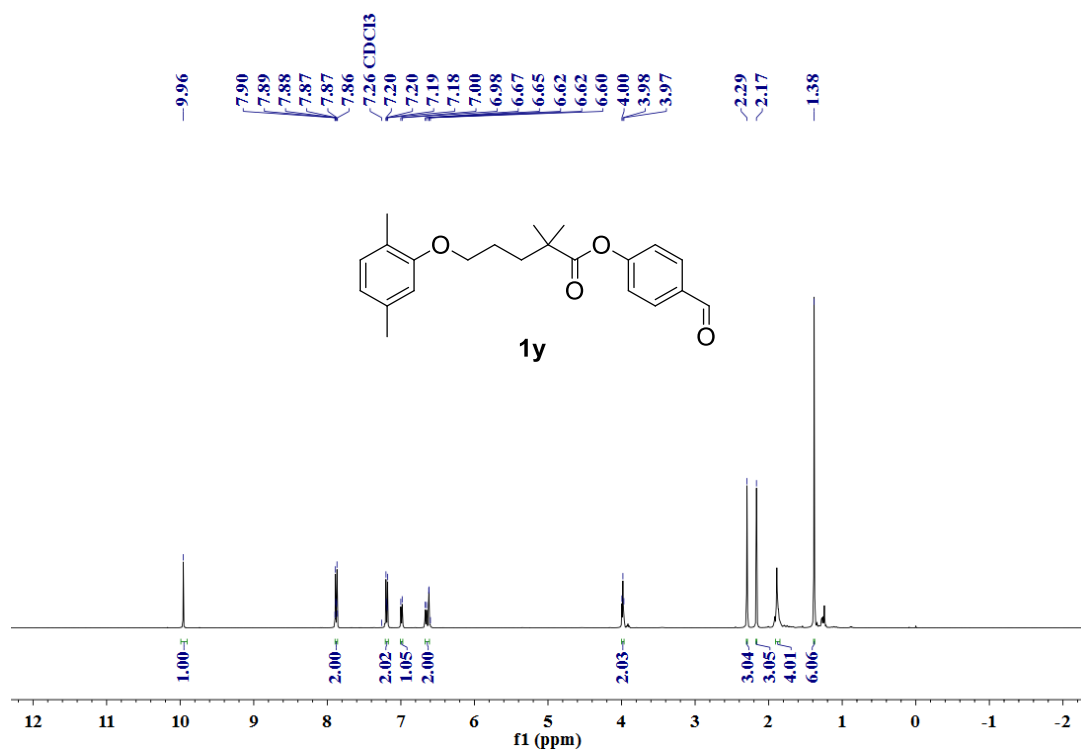

$^{13}\text{C}$  NMR (100 MHz,  $\text{CDCl}_3$ ):

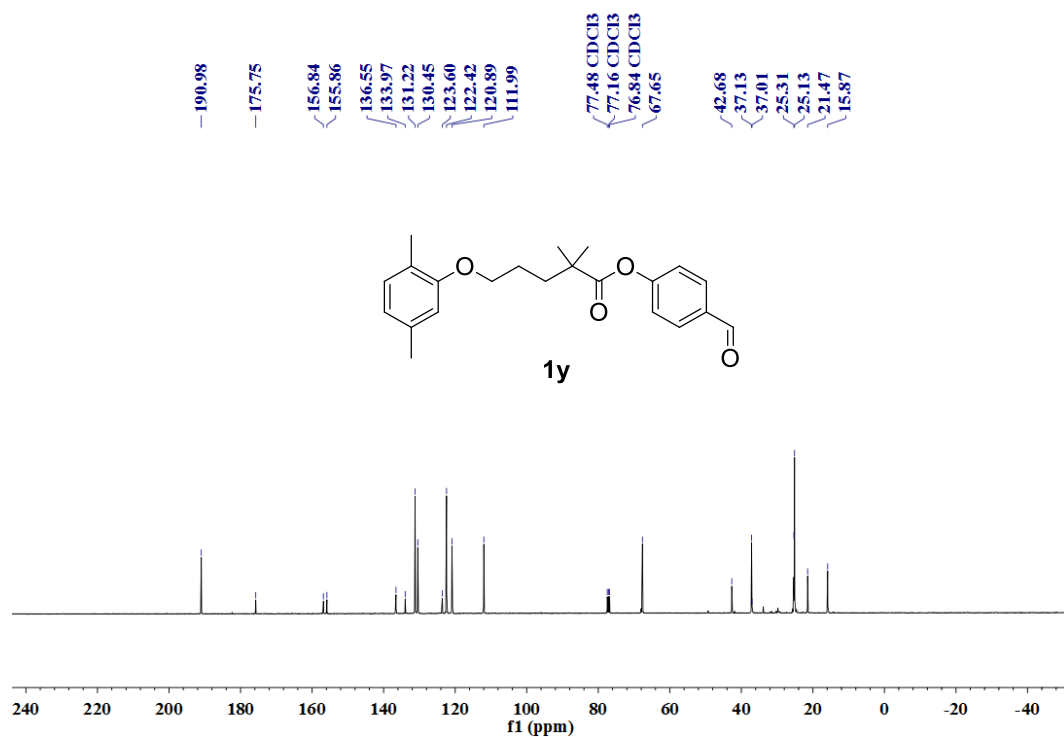

$^1\text{H}$  NMR (400 MHz,  $\text{CDCl}_3$ ):

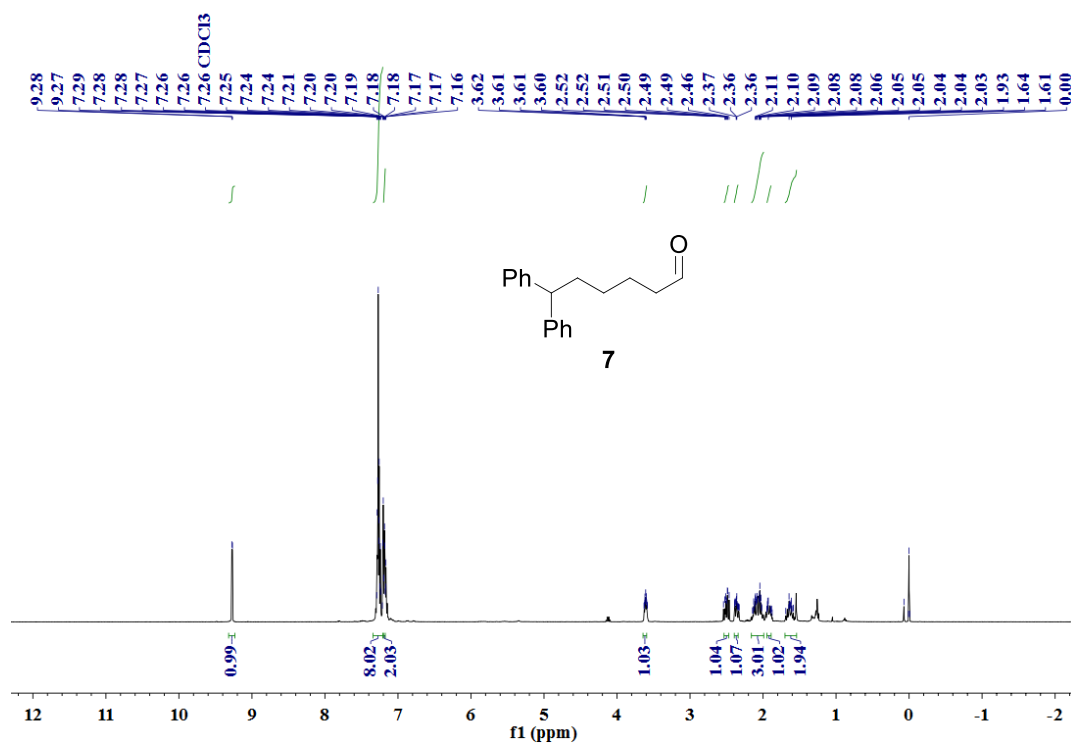

$^{13}\text{C}$  NMR (100 MHz,  $\text{CDCl}_3$ ):

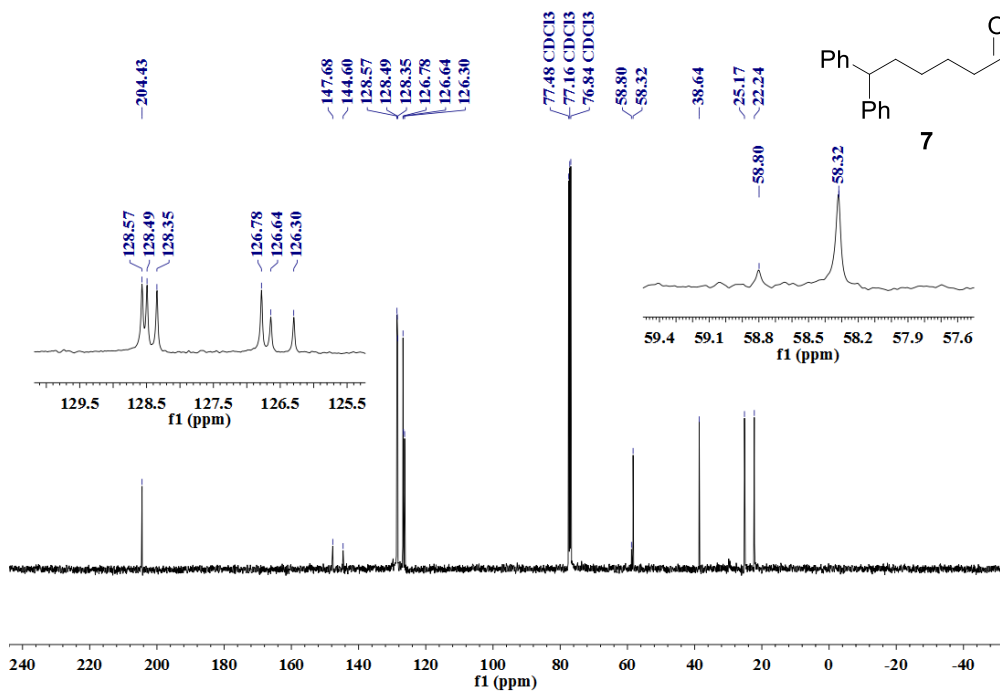

## 6. Cartesian Coordinates and Energies of the Optimized Structures

Geometry optimizations and characters of all the stationary points were calculated by using the M06-2X/6-31G(d,p) method. Single point energies (**Esol**, a.u.) are computed by using the M06-2X/cc-PVTZ method in solvent (benzene). The solvent effect was treated with the polarizable continuum model (PCM).

### **B<sub>2</sub>(pin)<sub>2</sub>**

|                                              |             |
|----------------------------------------------|-------------|
| Thermal correction to Energy=                | 0.386465    |
| Thermal correction to Enthalpy=              | 0.387410    |
| Thermal correction to Gibbs Free Energy=     | 0.317567    |
| Sum of electronic and zero-point Energies=   | -821.850963 |
| Sum of electronic and thermal Energies=      | -821.830996 |
| Sum of electronic and thermal Enthalpies=    | -821.830052 |
| Sum of electronic and thermal Free Energies= | -821.899895 |

Esol= -822.5113248

---

| Center<br>Number | Atomic<br>Number | Atomic<br>Type | Coordinates (Angstroms) |           |           |
|------------------|------------------|----------------|-------------------------|-----------|-----------|
|                  |                  |                | X                       | Y         | Z         |
| 1                | 6                | 0              | -2.983276               | 0.771194  | 0.121489  |
| 2                | 6                | 0              | -2.984383               | -0.771015 | -0.121353 |
| 3                | 5                | 0              | -0.852630               | -0.001146 | -0.001172 |
| 4                | 8                | 0              | -1.615951               | 1.126403  | -0.175872 |
| 5                | 8                | 0              | -1.616995               | -1.127869 | 0.174082  |
| 6                | 6                | 0              | -3.912037               | -1.562033 | 0.786394  |
| 7                | 1                | 0              | -4.950089               | -1.244570 | 0.642717  |
| 8                | 1                | 0              | -3.841497               | -2.625233 | 0.543929  |
| 9                | 1                | 0              | -3.646086               | -1.432999 | 1.836509  |
| 10               | 6                | 0              | -3.224889               | 1.141002  | 1.583859  |
| 11               | 1                | 0              | -2.994717               | 2.200100  | 1.720257  |
| 12               | 1                | 0              | -4.264423               | 0.966930  | 1.875690  |
| 13               | 1                | 0              | -2.572777               | 0.560956  | 2.243098  |
| 14               | 6                | 0              | -3.911205               | 1.563591  | -0.784760 |
| 15               | 1                | 0              | -4.949850               | 1.249842  | -0.637302 |
| 16               | 1                | 0              | -3.836318               | 2.626904  | -0.544078 |
| 17               | 1                | 0              | -3.649014               | 1.432196  | -1.835515 |
| 18               | 6                | 0              | -3.228464               | -1.140701 | -1.583324 |
| 19               | 1                | 0              | -2.999304               | -2.199988 | -1.719944 |
| 20               | 1                | 0              | -4.268319               | -0.965896 | -1.873614 |
| 21               | 1                | 0              | -2.576895               | -0.561216 | -2.243598 |
| 22               | 6                | 0              | 2.983452                | 0.771111  | -0.121515 |

|    |   |   |          |           |           |
|----|---|---|----------|-----------|-----------|
| 23 | 6 | 0 | 2.984143 | -0.771017 | 0.121527  |
| 24 | 5 | 0 | 0.852568 | -0.001155 | -0.001216 |
| 25 | 8 | 0 | 1.615711 | 1.126437  | 0.173941  |
| 26 | 8 | 0 | 1.617142 | -1.127897 | -0.175556 |
| 27 | 6 | 0 | 3.912892 | -1.562442 | -0.784723 |
| 28 | 1 | 0 | 4.951075 | -1.246838 | -0.637944 |
| 29 | 1 | 0 | 3.839932 | -2.625747 | -0.543420 |
| 30 | 1 | 0 | 3.649968 | -1.432040 | -1.835421 |
| 31 | 6 | 0 | 3.227186 | 1.140801  | -1.583566 |
| 32 | 1 | 0 | 2.996968 | 2.199833  | -1.720388 |
| 33 | 1 | 0 | 4.267205 | 0.966953  | -1.873825 |
| 34 | 1 | 0 | 2.576192 | 0.560537  | -2.243725 |
| 35 | 6 | 0 | 3.910139 | 1.563382  | 0.786105  |
| 36 | 1 | 0 | 4.948802 | 1.248510  | 0.641196  |
| 37 | 1 | 0 | 3.836826 | 2.626608  | 0.544553  |
| 38 | 1 | 0 | 3.645458 | 1.432902  | 1.836368  |
| 39 | 6 | 0 | 3.226521 | -1.140176 | 1.583923  |
| 40 | 1 | 0 | 2.997361 | -2.199443 | 1.720710  |
| 41 | 1 | 0 | 4.265992 | -0.965058 | 1.875390  |
| 42 | 1 | 0 | 2.574093 | -0.560516 | 2.243198  |

### A

|                                              |             |
|----------------------------------------------|-------------|
| Thermal correction to Energy=                | 0.094380    |
| Thermal correction to Enthalpy=              | 0.095324    |
| Thermal correction to Gibbs Free Energy=     | 0.058181    |
| Sum of electronic and zero-point Energies=   | -340.300304 |
| Sum of electronic and thermal Energies=      | -340.294337 |
| Sum of electronic and thermal Enthalpies=    | -340.293393 |
| Sum of electronic and thermal Free Energies= | -340.330537 |

Esol =-340.5096342

| Center<br>Number | Atomic<br>Number | Atomic<br>Type | Coordinates (Angstroms) |           |           |
|------------------|------------------|----------------|-------------------------|-----------|-----------|
|                  |                  |                | X                       | Y         | Z         |
| 1                | 6                | 0              | 1.501787                | 1.140544  | -0.000004 |
| 2                | 6                | 0              | 0.111946                | 1.203226  | 0.000009  |
| 3                | 6                | 0              | -0.594341               | 0.000000  | 0.000000  |
| 4                | 6                | 0              | 0.111946                | -1.203225 | -0.000009 |
| 5                | 6                | 0              | 1.501788                | -1.140543 | 0.000005  |
| 6                | 7                | 0              | 2.193304                | 0.000000  | 0.000000  |
| 7                | 1                | 0              | 2.087034                | 2.056307  | 0.000016  |

|    |   |   |           |           |           |
|----|---|---|-----------|-----------|-----------|
| 8  | 1 | 0 | -0.408026 | 2.153948  | 0.000025  |
| 9  | 1 | 0 | -0.408026 | -2.153948 | -0.000024 |
| 10 | 1 | 0 | 2.087034  | -2.056307 | -0.000016 |
| 11 | 6 | 0 | -2.035592 | 0.000000  | 0.000000  |
| 12 | 7 | 0 | -3.192093 | 0.000000  | 0.000000  |

---

### TSA1

|                                              |              |
|----------------------------------------------|--------------|
| Thermal correction to Energy=                | 0.482657     |
| Thermal correction to Enthalpy=              | 0.483601     |
| Thermal correction to Gibbs Free Energy=     | 0.400950     |
| Sum of electronic and zero-point Energies=   | -1162.162192 |
| Sum of electronic and thermal Energies=      | -1162.136059 |
| Sum of electronic and thermal Enthalpies=    | -1162.135115 |
| Sum of electronic and thermal Free Energies= | -1162.217766 |

Esol = -1163.0275948

---

| Center<br>Number | Atomic<br>Number | Atomic<br>Type | Coordinates (Angstroms) |           |           |
|------------------|------------------|----------------|-------------------------|-----------|-----------|
|                  |                  |                | X                       | Y         | Z         |
| 1                | 6                | 0              | 1.194293                | 2.678111  | -1.228755 |
| 2                | 6                | 0              | 1.093676                | 2.770858  | 1.186928  |
| 3                | 6                | 0              | 0.295763                | 1.621679  | -1.174784 |
| 4                | 1                | 0              | 1.574670                | 3.043187  | -2.175061 |
| 5                | 6                | 0              | 0.197281                | 1.710989  | 1.140186  |
| 6                | 1                | 0              | 1.397921                | 3.206114  | 2.131191  |
| 7                | 1                | 0              | -0.064327               | 1.100571  | -2.058550 |
| 8                | 1                | 0              | -0.240699               | 1.260752  | 2.027184  |
| 9                | 7                | 0              | -0.184142               | 1.169240  | -0.015603 |
| 10               | 6                | 0              | 2.229823                | -2.376356 | -0.695364 |
| 11               | 6                | 0              | 2.451641                | -1.749402 | 0.715450  |
| 12               | 5                | 0              | 0.322112                | -1.352721 | 0.016833  |
| 13               | 8                | 0              | 1.003687                | -1.745419 | -1.115904 |
| 14               | 8                | 0              | 1.102291                | -1.492622 | 1.150011  |
| 15               | 6                | 0              | 3.140087                | -2.657074 | 1.721375  |
| 16               | 1                | 0              | 4.139954                | -2.932987 | 1.370279  |
| 17               | 1                | 0              | 3.243695                | -2.134633 | 2.675766  |
| 18               | 1                | 0              | 2.562803                | -3.566784 | 1.892507  |
| 19               | 6                | 0              | 1.963897                | -3.879298 | -0.637226 |
| 20               | 1                | 0              | 1.602197                | -4.209539 | -1.613708 |
| 21               | 1                | 0              | 2.870070                | -4.439617 | -0.390133 |
| 22               | 1                | 0              | 1.195384                | -4.105884 | 0.107286  |

|    |   |   |           |           |           |
|----|---|---|-----------|-----------|-----------|
| 23 | 6 | 0 | 3.318003  | -2.068784 | -1.711465 |
| 24 | 1 | 0 | 4.283989  | -2.456262 | -1.371452 |
| 25 | 1 | 0 | 3.073614  | -2.545004 | -2.664296 |
| 26 | 1 | 0 | 3.409512  | -0.994383 | -1.880737 |
| 27 | 6 | 0 | 3.156384  | -0.393721 | 0.652405  |
| 28 | 1 | 0 | 3.086603  | 0.083133  | 1.633843  |
| 29 | 1 | 0 | 4.212545  | -0.495297 | 0.387080  |
| 30 | 1 | 0 | 2.673798  | 0.260244  | -0.083254 |
| 31 | 6 | 0 | -3.246860 | 0.063641  | -0.740925 |
| 32 | 6 | 0 | -3.329644 | -0.386871 | 0.753587  |
| 33 | 5 | 0 | -1.162727 | -0.509904 | 0.010567  |
| 34 | 8 | 0 | -1.968912 | -0.446715 | -1.142847 |
| 35 | 8 | 0 | -1.959055 | -0.363609 | 1.171640  |
| 36 | 6 | 0 | -4.143929 | 0.533225  | 1.651482  |
| 37 | 1 | 0 | -5.180423 | 0.598630  | 1.304070  |
| 38 | 1 | 0 | -4.149421 | 0.137174  | 2.670422  |
| 39 | 1 | 0 | -3.718444 | 1.538231  | 1.679385  |
| 40 | 6 | 0 | -3.246042 | 1.587192  | -0.893509 |
| 41 | 1 | 0 | -2.943397 | 1.836988  | -1.914690 |
| 42 | 1 | 0 | -4.241583 | 2.005138  | -0.716488 |
| 43 | 1 | 0 | -2.547104 | 2.059010  | -0.198711 |
| 44 | 6 | 0 | -4.313209 | -0.537284 | -1.646119 |
| 45 | 1 | 0 | -5.316598 | -0.271064 | -1.296924 |
| 46 | 1 | 0 | -4.190879 | -0.151304 | -2.661808 |
| 47 | 1 | 0 | -4.226963 | -1.624117 | -1.683511 |
| 48 | 6 | 0 | -3.819569 | -1.828668 | 0.897463  |
| 49 | 1 | 0 | -3.648865 | -2.151989 | 1.927204  |
| 50 | 1 | 0 | -4.885610 | -1.924630 | 0.670926  |
| 51 | 1 | 0 | -3.256048 | -2.490203 | 0.233308  |
| 52 | 6 | 0 | 1.596273  | 3.258198  | -0.021845 |
| 53 | 6 | 0 | 2.529706  | 4.356219  | -0.024993 |
| 54 | 7 | 0 | 3.278020  | 5.237709  | -0.027923 |

---

### IntA1

|                                              |              |
|----------------------------------------------|--------------|
| Thermal correction to Energy=                | 0.484045     |
| Thermal correction to Enthalpy=              | 0.484989     |
| Thermal correction to Gibbs Free Energy=     | 0.400671     |
| Sum of electronic and zero-point Energies=   | -1162.163733 |
| Sum of electronic and thermal Energies=      | -1162.137111 |
| Sum of electronic and thermal Enthalpies=    | -1162.136167 |
| Sum of electronic and thermal Free Energies= | -1162.220485 |

Esol =-1163.0304342



| Center<br>Number | Atomic<br>Number | Atomic<br>Type | Coordinates (Angstroms) |           |           |
|------------------|------------------|----------------|-------------------------|-----------|-----------|
|                  |                  |                | X                       | Y         | Z         |
| 1                | 6                | 0              | 2.564182                | -1.186574 | -1.318011 |
| 2                | 6                | 0              | 3.040021                | -1.583877 | 0.114728  |
| 3                | 5                | 0              | 0.970734                | -0.564433 | 0.226913  |
| 4                | 8                | 0              | 1.541906                | -0.225350 | -1.051420 |
| 5                | 8                | 0              | 1.822495                | -1.536309 | 0.860176  |
| 6                | 6                | 0              | 3.619514                | -2.987616 | 0.223431  |
| 7                | 1                | 0              | 4.482827                | -3.107263 | -0.439869 |
| 8                | 1                | 0              | 3.948594                | -3.172176 | 1.249885  |
| 9                | 1                | 0              | 2.868141                | -3.735855 | -0.033065 |
| 10               | 6                | 0              | 1.914286                | -2.361369 | -2.052519 |
| 11               | 1                | 0              | 1.416549                | -1.977567 | -2.946446 |
| 12               | 1                | 0              | 2.649321                | -3.113598 | -2.354636 |
| 13               | 1                | 0              | 1.156009                | -2.831743 | -1.419912 |
| 14               | 6                | 0              | 3.636148                | -0.546631 | -2.188586 |
| 15               | 1                | 0              | 4.477849                | -1.231292 | -2.337002 |
| 16               | 1                | 0              | 3.215792                | -0.305322 | -3.168562 |
| 17               | 1                | 0              | 4.009939                | 0.376813  | -1.741074 |
| 18               | 6                | 0              | 4.028699                | -0.569930 | 0.700190  |
| 19               | 1                | 0              | 4.115261                | -0.747449 | 1.775942  |
| 20               | 1                | 0              | 5.021528                | -0.668318 | 0.250707  |
| 21               | 1                | 0              | 3.684723                | 0.456830  | 0.545868  |
| 22               | 6                | 0              | -2.779898               | -1.775052 | -0.077920 |
| 23               | 6                | 0              | -2.726029               | -1.258757 | 1.393563  |
| 24               | 5                | 0              | -0.703619               | -0.946113 | 0.376126  |
| 25               | 8                | 0              | -1.385592               | -1.825376 | -0.435618 |
| 26               | 8                | 0              | -1.519007               | -0.468692 | 1.392636  |
| 27               | 6                | 0              | -3.897263               | -0.382759 | 1.808923  |
| 28               | 1                | 0              | -4.838332               | -0.936807 | 1.730752  |
| 29               | 1                | 0              | -3.771078               | -0.069998 | 2.848678  |
| 30               | 1                | 0              | -3.963306               | 0.512162  | 1.188436  |
| 31               | 6                | 0              | -3.448140               | -0.782725 | -1.028820 |
| 32               | 1                | 0              | -3.257325               | -1.101321 | -2.056074 |
| 33               | 1                | 0              | -4.529322               | -0.736485 | -0.869822 |
| 34               | 1                | 0              | -3.029379               | 0.219277  | -0.899049 |
| 35               | 6                | 0              | -3.386708               | -3.158998 | -0.248157 |
| 36               | 1                | 0              | -4.423785               | -3.171775 | 0.102985  |
| 37               | 1                | 0              | -3.379630               | -3.431798 | -1.306279 |
| 38               | 1                | 0              | -2.817967               | -3.910850 | 0.300833  |
| 39               | 6                | 0              | -2.517760               | -2.384265 | 2.406310  |

|    |   |   |           |           |           |
|----|---|---|-----------|-----------|-----------|
| 40 | 1 | 0 | -2.283548 | -1.943531 | 3.378661  |
| 41 | 1 | 0 | -3.413365 | -3.002912 | 2.511490  |
| 42 | 1 | 0 | -1.680923 | -3.021864 | 2.107397  |
| 43 | 6 | 0 | 1.329500  | 2.062247  | 0.544055  |
| 44 | 6 | 0 | 1.389694  | 3.243578  | 1.267837  |
| 45 | 6 | 0 | 1.038823  | 1.938774  | 3.271606  |
| 46 | 6 | 0 | 0.985037  | 0.809387  | 2.471002  |
| 47 | 1 | 0 | 1.453104  | 2.005672  | -0.532805 |
| 48 | 1 | 0 | 1.553099  | 4.191619  | 0.770727  |
| 49 | 1 | 0 | 0.925737  | 1.863811  | 4.345784  |
| 50 | 7 | 0 | 1.130270  | 0.886949  | 1.145721  |
| 51 | 1 | 0 | 0.828409  | -0.189908 | 2.862240  |
| 52 | 6 | 0 | 1.242112  | 3.175529  | 2.654723  |
| 53 | 6 | 0 | 1.301436  | 4.377344  | 3.447562  |
| 54 | 7 | 0 | 1.349643  | 5.341760  | 4.083545  |

## TSA2

|                                              |              |
|----------------------------------------------|--------------|
| Thermal correction to Energy=                | 0.579814     |
| Thermal correction to Enthalpy=              | 0.580758     |
| Thermal correction to Gibbs Free Energy=     | 0.481620     |
| Sum of electronic and zero-point Energies=   | -1502.477553 |
| Sum of electronic and thermal Energies=      | -1502.444229 |
| Sum of electronic and thermal Enthalpies=    | -1502.443285 |
| Sum of electronic and thermal Free Energies= | -1502.542423 |

Esol = -1503.546605

| Center<br>Number | Atomic<br>Number | Atomic<br>Type | Coordinates (Angstroms) |           |           |
|------------------|------------------|----------------|-------------------------|-----------|-----------|
|                  |                  |                | X                       | Y         | Z         |
| 1                | 6                | 0              | -1.917446               | 0.673667  | 2.796028  |
| 2                | 6                | 0              | -3.013189               | 1.378864  | 0.760650  |
| 3                | 6                | 0              | -0.710701               | 0.736051  | 2.117315  |
| 4                | 1                | 0              | -1.952094               | 0.379297  | 3.837532  |
| 5                | 6                | 0              | -1.763252               | 1.424998  | 0.161451  |
| 6                | 1                | 0              | -3.906081               | 1.635109  | 0.203108  |
| 7                | 1                | 0              | 0.240497                | 0.473904  | 2.567389  |
| 8                | 1                | 0              | -1.598559               | 1.720516  | -0.870494 |
| 9                | 7                | 0              | -0.653262               | 1.098565  | 0.831103  |
| 10               | 6                | 0              | 2.099765                | -2.442771 | 1.336900  |
| 11               | 6                | 0              | 2.557334                | -2.582890 | -0.149121 |
| 12               | 5                | 0              | 1.178354                | -0.765255 | 0.071392  |

|    |   |   |           |           |           |
|----|---|---|-----------|-----------|-----------|
| 13 | 8 | 0 | 0.975780  | -1.553181 | 1.233717  |
| 14 | 8 | 0 | 2.220504  | -1.298982 | -0.691225 |
| 15 | 6 | 0 | 4.051247  | -2.809488 | -0.332880 |
| 16 | 1 | 0 | 4.372872  | -3.725265 | 0.174444  |
| 17 | 1 | 0 | 4.276446  | -2.911008 | -1.397789 |
| 18 | 1 | 0 | 4.624656  | -1.967106 | 0.057035  |
| 19 | 6 | 0 | 3.143977  | -1.733343 | 2.200916  |
| 20 | 1 | 0 | 2.696122  | -1.502224 | 3.171387  |
| 21 | 1 | 0 | 4.029322  | -2.353709 | 2.367077  |
| 22 | 1 | 0 | 3.444813  | -0.791537 | 1.731961  |
| 23 | 6 | 0 | 1.657341  | -3.741108 | 1.993878  |
| 24 | 1 | 0 | 2.479634  | -4.463735 | 2.017376  |
| 25 | 1 | 0 | 1.347929  | -3.544925 | 3.024098  |
| 26 | 1 | 0 | 0.815060  | -4.188240 | 1.461898  |
| 27 | 6 | 0 | 1.772379  | -3.652260 | -0.910493 |
| 28 | 1 | 0 | 1.961626  | -3.526074 | -1.979755 |
| 29 | 1 | 0 | 2.081133  | -4.660313 | -0.617608 |
| 30 | 1 | 0 | 0.698093  | -3.551098 | -0.740109 |
| 31 | 6 | 0 | 1.993877  | 2.938008  | 0.102065  |
| 32 | 6 | 0 | 1.681643  | 2.568603  | -1.382414 |
| 33 | 5 | 0 | 0.854582  | 0.928586  | 0.020248  |
| 34 | 8 | 0 | 1.822677  | 1.687601  | 0.767092  |
| 35 | 8 | 0 | 0.638743  | 1.599529  | -1.247927 |
| 36 | 6 | 0 | 1.180284  | 3.726805  | -2.232904 |
| 37 | 1 | 0 | 1.925925  | 4.527367  | -2.279409 |
| 38 | 1 | 0 | 0.991295  | 3.379605  | -3.252563 |
| 39 | 1 | 0 | 0.250170  | 4.137526  | -1.834073 |
| 40 | 6 | 0 | 0.993081  | 3.950159  | 0.669565  |
| 41 | 1 | 0 | 1.092333  | 3.964766  | 1.758470  |
| 42 | 1 | 0 | 1.177108  | 4.959763  | 0.289511  |
| 43 | 1 | 0 | -0.035572 | 3.673129  | 0.420922  |
| 44 | 6 | 0 | 3.415116  | 3.426437  | 0.346184  |
| 45 | 1 | 0 | 3.634556  | 4.315210  | -0.255203 |
| 46 | 1 | 0 | 3.537766  | 3.688085  | 1.400881  |
| 47 | 1 | 0 | 4.136976  | 2.645172  | 0.103196  |
| 48 | 6 | 0 | 2.867719  | 1.880444  | -2.061901 |
| 49 | 1 | 0 | 2.530946  | 1.472111  | -3.019079 |
| 50 | 1 | 0 | 3.690667  | 2.575901  | -2.252693 |
| 51 | 1 | 0 | 3.226087  | 1.048799  | -1.448292 |
| 52 | 6 | 0 | -1.596509 | -1.843269 | -0.261674 |
| 53 | 6 | 0 | -2.903559 | -1.854183 | -0.732883 |
| 54 | 6 | 0 | -2.077949 | -0.812489 | -2.751115 |
| 55 | 6 | 0 | -0.806871 | -0.844072 | -2.187055 |
| 56 | 1 | 0 | -1.325457 | -2.219787 | 0.722904  |

|    |   |   |           |           |           |
|----|---|---|-----------|-----------|-----------|
| 57 | 1 | 0 | -3.714600 | -2.253774 | -0.135392 |
| 58 | 1 | 0 | -2.241747 | -0.396680 | -3.738079 |
| 59 | 7 | 0 | -0.582989 | -1.348256 | -0.972960 |
| 60 | 1 | 0 | 0.059540  | -0.422717 | -2.687480 |
| 61 | 6 | 0 | -3.087079 | 0.992998  | 2.100889  |
| 62 | 6 | 0 | -3.141814 | -1.323641 | -2.003868 |
| 63 | 6 | 0 | -4.481335 | -1.289255 | -2.534334 |
| 64 | 7 | 0 | -5.557595 | -1.252307 | -2.955999 |
| 65 | 6 | 0 | -4.363911 | 0.918932  | 2.764124  |
| 66 | 7 | 0 | -5.388246 | 0.853765  | 3.296632  |

---

### IntA2

|                                              |              |
|----------------------------------------------|--------------|
| Thermal correction to Energy=                | 0.580853     |
| Thermal correction to Enthalpy=              | 0.581798     |
| Thermal correction to Gibbs Free Energy=     | 0.484598     |
| Sum of electronic and zero-point Energies=   | -1502.480483 |
| Sum of electronic and thermal Energies=      | -1502.447245 |
| Sum of electronic and thermal Enthalpies=    | -1502.446301 |
| Sum of electronic and thermal Free Energies= | -1502.543500 |

Esol =-1503.5496756

---

| Center<br>Number | Atomic<br>Number | Atomic<br>Type | Coordinates (Angstroms) |           |           |
|------------------|------------------|----------------|-------------------------|-----------|-----------|
|                  |                  |                | X                       | Y         | Z         |
| 1                | 6                | 0              | -0.785968               | 2.077328  | -3.199423 |
| 2                | 6                | 0              | -1.478111               | 3.434561  | -1.323760 |
| 3                | 6                | 0              | -0.811156               | 0.976705  | -2.361448 |
| 4                | 1                | 0              | -0.513848               | 1.970166  | -4.241972 |
| 5                | 6                | 0              | -1.485309               | 2.283218  | -0.552796 |
| 6                | 1                | 0              | -1.753003               | 4.389911  | -0.893683 |
| 7                | 1                | 0              | -0.558447               | -0.027897 | -2.680535 |
| 8                | 1                | 0              | -1.765307               | 2.261216  | 0.496290  |
| 9                | 7                | 0              | -1.152677               | 1.091564  | -1.068662 |
| 10               | 6                | 0              | 2.464564                | -1.144416 | -1.325657 |
| 11               | 6                | 0              | 2.653904                | -1.684267 | 0.127363  |
| 12               | 5                | 0              | 0.879440                | -0.214157 | 0.074851  |
| 13               | 8                | 0              | 1.667296                | 0.025823  | -1.121483 |
| 14               | 8                | 0              | 1.392519                | -1.389664 | 0.726992  |
| 15               | 6                | 0              | 2.895626                | -3.184006 | 0.219440  |
| 16               | 1                | 0              | 3.785650                | -3.475310 | -0.348571 |
| 17               | 1                | 0              | 3.048596                | -3.468088 | 1.264333  |

|    |   |   |           |           |           |
|----|---|---|-----------|-----------|-----------|
| 18 | 1 | 0 | 2.033467  | -3.734736 | -0.160201 |
| 19 | 6 | 0 | 1.654503  | -2.112844 | -2.191126 |
| 20 | 1 | 0 | 1.409291  | -1.612938 | -3.133911 |
| 21 | 1 | 0 | 2.217016  | -3.021053 | -2.427536 |
| 22 | 1 | 0 | 0.720806  | -2.380881 | -1.685867 |
| 23 | 6 | 0 | 3.755454  | -0.752524 | -2.030095 |
| 24 | 1 | 0 | 4.425722  | -1.613556 | -2.122590 |
| 25 | 1 | 0 | 3.529305  | -0.388790 | -3.036347 |
| 26 | 1 | 0 | 4.275603  | 0.041247  | -1.490279 |
| 27 | 6 | 0 | 3.752523  | -0.927657 | 0.881230  |
| 28 | 1 | 0 | 3.667002  | -1.158977 | 1.946654  |
| 29 | 1 | 0 | 4.751861  | -1.216843 | 0.541892  |
| 30 | 1 | 0 | 3.645156  | 0.153599  | 0.751849  |
| 31 | 6 | 0 | -2.653901 | -1.684274 | -0.127363 |
| 32 | 6 | 0 | -2.464566 | -1.144417 | 1.325656  |
| 33 | 5 | 0 | -0.879441 | -0.214160 | -0.074852 |
| 34 | 8 | 0 | -1.392515 | -1.389671 | -0.726988 |
| 35 | 8 | 0 | -1.667301 | 0.025823  | 1.121479  |
| 36 | 6 | 0 | -3.755460 | -0.752524 | 2.030088  |
| 37 | 1 | 0 | -4.425727 | -1.613557 | 2.122584  |
| 38 | 1 | 0 | -3.529315 | -0.388786 | 3.036339  |
| 39 | 1 | 0 | -4.275608 | 0.041243  | 1.490267  |
| 40 | 6 | 0 | -3.752518 | -0.927670 | -0.881236 |
| 41 | 1 | 0 | -3.666995 | -1.158995 | -1.946658 |
| 42 | 1 | 0 | -4.751857 | -1.216855 | -0.541898 |
| 43 | 1 | 0 | -3.645153 | 0.153587  | -0.751860 |
| 44 | 6 | 0 | -2.895619 | -3.184014 | -0.219434 |
| 45 | 1 | 0 | -3.785645 | -3.475318 | 0.348576  |
| 46 | 1 | 0 | -3.048586 | -3.468101 | -1.264326 |
| 47 | 1 | 0 | -2.033461 | -3.734740 | 0.160212  |
| 48 | 6 | 0 | -1.654507 | -2.112840 | 2.191132  |
| 49 | 1 | 0 | -1.409301 | -1.612931 | 3.133917  |
| 50 | 1 | 0 | -2.217018 | -3.021050 | 2.427541  |
| 51 | 1 | 0 | -0.720806 | -2.380875 | 1.685878  |
| 52 | 6 | 0 | 1.485240  | 2.283242  | 0.552778  |
| 53 | 6 | 0 | 1.478039  | 3.434581  | 1.323747  |
| 54 | 6 | 0 | 0.786040  | 2.077314  | 3.199439  |
| 55 | 6 | 0 | 0.811226  | 0.976696  | 2.361458  |
| 56 | 1 | 0 | 1.765185  | 2.261255  | -0.496323 |
| 57 | 1 | 0 | 1.752874  | 4.389943  | 0.893661  |
| 58 | 1 | 0 | 0.513976  | 1.970137  | 4.242001  |
| 59 | 7 | 0 | 1.152677  | 1.091574  | 1.068655  |
| 60 | 1 | 0 | 0.558570  | -0.027917 | 2.680553  |
| 61 | 6 | 0 | -1.119013 | 3.328360  | -2.669800 |

|    |   |   |           |          |           |
|----|---|---|-----------|----------|-----------|
| 62 | 6 | 0 | 1.119012  | 3.328361 | 2.669805  |
| 63 | 6 | 0 | 1.093294  | 4.500118 | 3.505630  |
| 64 | 7 | 0 | 1.069615  | 5.443517 | 4.174314  |
| 65 | 6 | 0 | -1.093296 | 4.500122 | -3.505618 |
| 66 | 7 | 0 | -1.069618 | 5.443525 | -4.174297 |

### TSA3

|                                              |              |
|----------------------------------------------|--------------|
| Thermal correction to Energy=                | 0.579963     |
| Thermal correction to Enthalpy=              | 0.580908     |
| Thermal correction to Gibbs Free Energy=     | 0.486567     |
| Sum of electronic and zero-point Energies=   | -1502.476367 |
| Sum of electronic and thermal Energies=      | -1502.443837 |
| Sum of electronic and thermal Enthalpies=    | -1502.442893 |
| Sum of electronic and thermal Free Energies= | -1502.537234 |

Esol = -1503.5444016

| Center<br>Number | Atomic<br>Number | Atomic<br>Type | Coordinates (Angstroms) |           |           |
|------------------|------------------|----------------|-------------------------|-----------|-----------|
|                  |                  |                | X                       | Y         | Z         |
| 1                | 6                | 0              | 1.566661                | -2.219168 | -2.353764 |
| 2                | 6                | 0              | 3.001715                | -0.386039 | -1.721474 |
| 3                | 6                | 0              | 0.483144                | -1.464516 | -1.990711 |
| 4                | 1                | 0              | 1.421705                | -3.212790 | -2.759502 |
| 5                | 6                | 0              | 1.872929                | 0.327127  | -1.360330 |
| 6                | 1                | 0              | 3.979190                | 0.071265  | -1.620944 |
| 7                | 1                | 0              | -0.540800               | -1.802887 | -2.081787 |
| 8                | 1                | 0              | 1.902805                | 1.351022  | -1.004286 |
| 9                | 7                | 0              | 0.627241                | -0.202029 | -1.487298 |
| 10               | 6                | 0              | -1.636264               | -2.525140 | 1.100568  |
| 11               | 6                | 0              | -2.267003               | -1.459973 | 2.057514  |
| 12               | 5                | 0              | -0.575689               | -0.506082 | 0.874350  |
| 13               | 8                | 0              | -0.396537               | -1.904079 | 0.715806  |
| 14               | 8                | 0              | -1.824659               | -0.220721 | 1.480867  |
| 15               | 6                | 0              | -3.786368               | -1.461023 | 2.094233  |
| 16               | 1                | 0              | -4.169133               | -2.434474 | 2.418070  |
| 17               | 1                | 0              | -4.136690               | -0.703862 | 2.800913  |
| 18               | 1                | 0              | -4.195139               | -1.226583 | 1.109596  |
| 19               | 6                | 0              | -2.471455               | -2.740514 | -0.160278 |
| 20               | 1                | 0              | -1.895437               | -3.361157 | -0.854086 |
| 21               | 1                | 0              | -3.405527               | -3.264522 | 0.062524  |
| 22               | 1                | 0              | -2.695098               | -1.784101 | -0.642527 |
| 23               | 6                | 0              | -1.323080               | -3.858854 | 1.762939  |

|    |   |   |           |           |           |
|----|---|---|-----------|-----------|-----------|
| 24 | 1 | 0 | -2.233856 | -4.313786 | 2.165951  |
| 25 | 1 | 0 | -0.898866 | -4.543831 | 1.024107  |
| 26 | 1 | 0 | -0.600180 | -3.739348 | 2.571575  |
| 27 | 6 | 0 | -1.693048 | -1.542651 | 3.473138  |
| 28 | 1 | 0 | -2.002967 | -0.653899 | 4.028779  |
| 29 | 1 | 0 | -2.048926 | -2.428914 | 4.006420  |
| 30 | 1 | 0 | -0.598874 | -1.568501 | 3.447790  |
| 31 | 6 | 0 | -2.267085 | 1.459904  | -2.057537 |
| 32 | 6 | 0 | -1.636340 | 2.525070  | -1.100584 |
| 33 | 5 | 0 | -0.575674 | 0.506047  | -0.874445 |
| 34 | 8 | 0 | -1.824593 | 0.220639  | -1.481031 |
| 35 | 8 | 0 | -0.396591 | 1.904041  | -0.715851 |
| 36 | 6 | 0 | -1.323170 | 3.858805  | -1.762914 |
| 37 | 1 | 0 | -2.233988 | 4.313871  | -2.165680 |
| 38 | 1 | 0 | -0.898730 | 4.543657  | -1.024097 |
| 39 | 1 | 0 | -0.600451 | 3.739320  | -2.571713 |
| 40 | 6 | 0 | -1.693298 | 1.542697  | -3.473218 |
| 41 | 1 | 0 | -2.003255 | 0.653975  | -4.028884 |
| 42 | 1 | 0 | -2.049259 | 2.428988  | -4.006400 |
| 43 | 1 | 0 | -0.599120 | 1.568568  | -3.447986 |
| 44 | 6 | 0 | -3.786458 | 1.460858  | -2.094070 |
| 45 | 1 | 0 | -4.169335 | 2.434431  | -2.417411 |
| 46 | 1 | 0 | -4.136840 | 0.703997  | -2.801041 |
| 47 | 1 | 0 | -4.195058 | 1.225950  | -1.109472 |
| 48 | 6 | 0 | -2.471530 | 2.740419  | 0.160270  |
| 49 | 1 | 0 | -1.895585 | 3.361174  | 0.854039  |
| 50 | 1 | 0 | -3.405674 | 3.264293  | -0.062547 |
| 51 | 1 | 0 | -2.695058 | 1.784004  | 0.642567  |
| 52 | 6 | 0 | 1.872884  | -0.327067 | 1.360350  |
| 53 | 6 | 0 | 3.001629  | 0.386144  | 1.721528  |
| 54 | 6 | 0 | 1.566483  | 2.219213  | 2.353775  |
| 55 | 6 | 0 | 0.483007  | 1.464516  | 1.990688  |
| 56 | 1 | 0 | 1.902816  | -1.350965 | 1.004321  |
| 57 | 1 | 0 | 3.979124  | -0.071122 | 1.621025  |
| 58 | 1 | 0 | 1.421472  | 3.212828  | 2.759512  |
| 59 | 7 | 0 | 0.627168  | 0.202040  | 1.487266  |
| 60 | 1 | 0 | -0.540953 | 1.802843  | 2.081750  |
| 61 | 6 | 0 | 2.864303  | -1.683561 | -2.216406 |
| 62 | 6 | 0 | 2.864152  | 1.683663  | 2.216450  |
| 63 | 6 | 0 | 4.015367  | 2.452221  | 2.586377  |
| 64 | 7 | 0 | 4.945345  | 3.075711  | 2.882736  |
| 65 | 6 | 0 | 4.015556  | -2.452071 | -2.586318 |
| 66 | 7 | 0 | 4.945555  | -3.075531 | -2.882672 |

### IntA3

|                                              |              |
|----------------------------------------------|--------------|
| Thermal correction to Energy=                | 0.584419     |
| Thermal correction to Enthalpy=              | 0.585364     |
| Thermal correction to Gibbs Free Energy=     | 0.490141     |
| Sum of electronic and zero-point Energies=   | -1502.542337 |
| Sum of electronic and thermal Energies=      | -1502.509748 |
| Sum of electronic and thermal Enthalpies=    | -1502.508803 |
| Sum of electronic and thermal Free Energies= | -1502.604026 |

Esol =-1503.6203191

| Center<br>Number | Atomic<br>Number | Atomic<br>Type | Coordinates (Angstroms) |           |           |
|------------------|------------------|----------------|-------------------------|-----------|-----------|
|                  |                  |                | X                       | Y         | Z         |
| 1                | 6                | 0              | -1.192411               | 2.918531  | -0.064897 |
| 2                | 6                | 0              | -2.265922               | 0.855173  | -0.809719 |
| 3                | 6                | 0              | 0.017750                | 2.368775  | -0.277069 |
| 4                | 1                | 0              | -1.294106               | 3.935734  | 0.285978  |
| 5                | 6                | 0              | -0.963968               | 0.155567  | -0.535331 |
| 6                | 1                | 0              | -3.108999               | 0.298453  | -1.202832 |
| 7                | 1                | 0              | 0.943598                | 2.920113  | -0.155419 |
| 8                | 1                | 0              | -0.825382               | -0.704150 | -1.197988 |
| 9                | 7                | 0              | 0.159565                | 1.068443  | -0.739529 |
| 10               | 6                | 0              | 2.399557                | 1.473403  | 2.999795  |
| 11               | 6                | 0              | 3.261204                | 0.164621  | 3.064959  |
| 12               | 5                | 0              | 1.355574                | -0.217096 | 1.924984  |
| 13               | 8                | 0              | 1.116824                | 0.979379  | 2.547387  |
| 14               | 8                | 0              | 2.653518                | -0.658825 | 2.042750  |
| 15               | 6                | 0              | 4.730203                | 0.352394  | 2.728815  |
| 16               | 1                | 0              | 5.203630                | 1.030687  | 3.445580  |
| 17               | 1                | 0              | 5.241980                | -0.611951 | 2.779209  |
| 18               | 1                | 0              | 4.855815                | 0.760237  | 1.724315  |
| 19               | 6                | 0              | 2.902889                | 2.461933  | 1.953014  |
| 20               | 1                | 0              | 2.161819                | 3.258607  | 1.847194  |
| 21               | 1                | 0              | 3.850140                | 2.914096  | 2.260405  |
| 22               | 1                | 0              | 3.037030                | 1.980959  | 0.978552  |
| 23               | 6                | 0              | 2.204511                | 2.169772  | 4.336803  |
| 24               | 1                | 0              | 3.168698                | 2.482964  | 4.749644  |
| 25               | 1                | 0              | 1.587649                | 3.060427  | 4.195053  |
| 26               | 1                | 0              | 1.705452                | 1.519598  | 5.056463  |
| 27               | 6                | 0              | 3.103367                | -0.584015 | 4.386124  |
| 28               | 1                | 0              | 3.560946                | -1.571143 | 4.287754  |



|    |   |   |           |           |           |
|----|---|---|-----------|-----------|-----------|
| 29 | 1 | 0 | 3.590226  | -0.052629 | 5.208039  |
| 30 | 1 | 0 | 2.046465  | -0.719593 | 4.633978  |
| 31 | 6 | 0 | 3.437111  | 0.737400  | -2.235186 |
| 32 | 6 | 0 | 2.920858  | -0.742810 | -2.268869 |
| 33 | 5 | 0 | 1.387095  | 0.608614  | -1.308586 |
| 34 | 8 | 0 | 2.540299  | 1.358174  | -1.285844 |
| 35 | 8 | 0 | 1.515940  | -0.590416 | -1.958684 |
| 36 | 6 | 0 | 3.048389  | -1.425081 | -3.620960 |
| 37 | 1 | 0 | 4.098781  | -1.477570 | -3.924679 |
| 38 | 1 | 0 | 2.660603  | -2.444120 | -3.551800 |
| 39 | 1 | 0 | 2.484311  | -0.896130 | -4.390246 |
| 40 | 6 | 0 | 3.244598  | 1.463657  | -3.564159 |
| 41 | 1 | 0 | 3.432844  | 2.529066  | -3.413381 |
| 42 | 1 | 0 | 3.933457  | 1.090845  | -4.326623 |
| 43 | 1 | 0 | 2.220376  | 1.345188  | -3.929846 |
| 44 | 6 | 0 | 4.862980  | 0.902059  | -1.738421 |
| 45 | 1 | 0 | 5.560985  | 0.379437  | -2.400079 |
| 46 | 1 | 0 | 5.127288  | 1.962522  | -1.729988 |
| 47 | 1 | 0 | 4.977590  | 0.508020  | -0.726818 |
| 48 | 6 | 0 | 3.535918  | -1.608327 | -1.173878 |
| 49 | 1 | 0 | 3.005454  | -2.564025 | -1.150468 |
| 50 | 1 | 0 | 4.592618  | -1.807509 | -1.373236 |
| 51 | 1 | 0 | 3.442695  | -1.134676 | -0.190851 |
| 52 | 6 | 0 | -0.955623 | -0.376781 | 0.938995  |
| 53 | 6 | 0 | -2.050984 | -1.391630 | 1.116033  |
| 54 | 6 | 0 | -0.422711 | -3.103837 | 0.499804  |
| 55 | 6 | 0 | 0.582379  | -2.261421 | 0.802488  |
| 56 | 1 | 0 | -1.099686 | 0.484114  | 1.599023  |
| 57 | 1 | 0 | -3.038408 | -1.073711 | 1.430537  |
| 58 | 1 | 0 | -0.228543 | -4.112452 | 0.163155  |
| 59 | 7 | 0 | 0.345422  | -0.969108 | 1.248629  |
| 60 | 1 | 0 | 1.625171  | -2.557081 | 0.771565  |
| 61 | 6 | 0 | -2.367400 | 2.159121  | -0.486852 |
| 62 | 6 | 0 | -1.785168 | -2.675900 | 0.809525  |
| 63 | 6 | 0 | -2.822166 | -3.673264 | 0.881555  |
| 64 | 7 | 0 | -3.644721 | -4.486049 | 0.926494  |
| 65 | 6 | 0 | -3.619896 | 2.853224  | -0.643575 |
| 66 | 7 | 0 | -4.621534 | 3.422403  | -0.752386 |

---

#### TSA4

|                                          |          |
|------------------------------------------|----------|
| Thermal correction to Energy=            | 0.580769 |
| Thermal correction to Enthalpy=          | 0.581713 |
| Thermal correction to Gibbs Free Energy= | 0.485500 |

Sum of electronic and zero-point Energies= -1502.501972  
 Sum of electronic and thermal Energies= -1502.469157  
 Sum of electronic and thermal Enthalpies= -1502.468213  
 Sum of electronic and thermal Free Energies= -1502.564426

Esol = -1503.5796455

| Center<br>Number | Atomic<br>Number | Atomic<br>Type | Coordinates (Angstroms) |           |           |
|------------------|------------------|----------------|-------------------------|-----------|-----------|
|                  |                  |                | X                       | Y         | Z         |
| 1                | 6                | 0              | 1.813266                | -0.721878 | -3.081922 |
| 2                | 6                | 0              | 3.295701                | 0.440979  | -1.557725 |
| 3                | 6                | 0              | 0.752098                | -0.205929 | -2.431409 |
| 4                | 1                | 0              | 1.657925                | -1.363977 | -3.939803 |
| 5                | 6                | 0              | 2.185340                | 0.850480  | -0.820900 |
| 6                | 1                | 0              | 4.281445                | 0.718931  | -1.199876 |
| 7                | 1                | 0              | -0.269332               | -0.373921 | -2.743638 |
| 8                | 1                | 0              | 2.255235                | 1.600607  | -0.042401 |
| 9                | 7                | 0              | 0.895381                | 0.642158  | -1.326602 |
| 10               | 6                | 0              | -1.468480               | -2.858782 | -0.354684 |
| 11               | 6                | 0              | -2.248458               | -2.351226 | 0.909340  |
| 12               | 5                | 0              | -0.239303               | -1.350731 | 0.795476  |
| 13               | 8                | 0              | -0.128427               | -2.359375 | -0.120751 |
| 14               | 8                | 0              | -1.513982               | -1.157179 | 1.274434  |
| 15               | 6                | 0              | -3.697073               | -1.974706 | 0.652669  |
| 16               | 1                | 0              | -4.266287               | -2.848325 | 0.320038  |
| 17               | 1                | 0              | -4.147312               | -1.605991 | 1.578162  |
| 18               | 1                | 0              | -3.773524               | -1.195051 | -0.106838 |
| 19               | 6                | 0              | -1.977210               | -2.236513 | -1.649976 |
| 20               | 1                | 0              | -1.272880               | -2.479213 | -2.449970 |
| 21               | 1                | 0              | -2.957412               | -2.640495 | -1.918846 |
| 22               | 1                | 0              | -2.054468               | -1.148492 | -1.561217 |
| 23               | 6                | 0              | -1.398097               | -4.371605 | -0.487604 |
| 24               | 1                | 0              | -2.404166               | -4.794108 | -0.573899 |
| 25               | 1                | 0              | -0.839655               | -4.630824 | -1.390092 |
| 26               | 1                | 0              | -0.895825               | -4.825681 | 0.367551  |
| 27               | 6                | 0              | -2.143244               | -3.306615 | 2.095937  |
| 28               | 1                | 0              | -2.537030               | -2.808968 | 2.985026  |
| 29               | 1                | 0              | -2.715573               | -4.221966 | 1.924615  |
| 30               | 1                | 0              | -1.100792               | -3.577540 | 2.288463  |
| 31               | 6                | 0              | -2.248562               | 2.351353  | -0.909353 |
| 32               | 6                | 0              | -1.468470               | 2.858989  | 0.354541  |
| 33               | 5                | 0              | -0.239335               | 1.350993  | -0.795679 |

|    |   |   |           |           |           |
|----|---|---|-----------|-----------|-----------|
| 34 | 8 | 0 | -1.514081 | 1.157298  | -1.274411 |
| 35 | 8 | 0 | -0.128361 | 2.359854  | 0.120304  |
| 36 | 6 | 0 | -1.398406 | 4.371808  | 0.487566  |
| 37 | 1 | 0 | -2.404561 | 4.794080  | 0.573985  |
| 38 | 1 | 0 | -0.839930 | 4.631101  | 1.390011  |
| 39 | 1 | 0 | -0.896324 | 4.826038  | -0.367620 |
| 40 | 6 | 0 | -2.143488 | 3.306673  | -2.096015 |
| 41 | 1 | 0 | -2.537277 | 2.808932  | -2.985051 |
| 42 | 1 | 0 | -2.715899 | 4.221978  | -1.924716 |
| 43 | 1 | 0 | -1.101073 | 3.577692  | -2.288609 |
| 44 | 6 | 0 | -3.697145 | 1.974840  | -0.652491 |
| 45 | 1 | 0 | -4.266279 | 2.848462  | -0.319727 |
| 46 | 1 | 0 | -4.147546 | 1.606182  | -1.577928 |
| 47 | 1 | 0 | -3.773493 | 1.195158  | 0.106996  |
| 48 | 6 | 0 | -1.976771 | 2.236381  | 1.649835  |
| 49 | 1 | 0 | -1.272196 | 2.478927  | 2.449658  |
| 50 | 1 | 0 | -2.956946 | 2.640158  | 1.919107  |
| 51 | 1 | 0 | -2.053919 | 1.148372  | 1.560703  |
| 52 | 6 | 0 | 2.185402  | -0.850334 | 0.820800  |
| 53 | 6 | 0 | 3.295764  | -0.440941 | 1.557669  |
| 54 | 6 | 0 | 1.813352  | 0.721461  | 3.082233  |
| 55 | 6 | 0 | 0.752175  | 0.205697  | 2.431587  |
| 56 | 1 | 0 | 2.255266  | -1.600335 | 0.042176  |
| 57 | 1 | 0 | 4.281503  | -0.718761 | 1.199703  |
| 58 | 1 | 0 | 1.658020  | 1.363261  | 3.940340  |
| 59 | 7 | 0 | 0.895449  | -0.642038 | 1.326499  |
| 60 | 1 | 0 | -0.269244 | 0.373517  | 2.743953  |
| 61 | 6 | 0 | 3.152845  | -0.376288 | -2.666508 |
| 62 | 6 | 0 | 3.152924  | 0.376058  | 2.666655  |
| 63 | 6 | 0 | 4.284493  | 0.862746  | 3.380465  |
| 64 | 7 | 0 | 5.199866  | 1.266103  | 3.969703  |
| 65 | 6 | 0 | 4.284359  | -0.863040 | -3.380257 |
| 66 | 7 | 0 | 5.199719  | -1.266481 | -3.969456 |

---

#### IntA4

|                                              |             |
|----------------------------------------------|-------------|
| Thermal correction to Energy=                | 0.288834    |
| Thermal correction to Enthalpy=              | 0.289778    |
| Thermal correction to Gibbs Free Energy=     | 0.227912    |
| Sum of electronic and zero-point Energies=   | -751.250341 |
| Sum of electronic and thermal Energies=      | -751.233933 |
| Sum of electronic and thermal Enthalpies=    | -751.232989 |
| Sum of electronic and thermal Free Energies= | -751.294855 |

Esol = -751.7913445

---

| Center<br>Number | Atomic<br>Number | Atomic<br>Type | Coordinates (Angstroms) |           |           |
|------------------|------------------|----------------|-------------------------|-----------|-----------|
|                  |                  |                | X                       | Y         | Z         |
| 1                | 6                | 0              | 1.659096                | 1.185973  | -0.180389 |
| 2                | 6                | 0              | 3.014411                | 1.204109  | -0.183755 |
| 3                | 6                | 0              | 3.757894                | -0.000017 | -0.000053 |
| 4                | 6                | 0              | 3.014407                | -1.204136 | 0.183668  |
| 5                | 6                | 0              | 1.659092                | -1.185990 | 0.180337  |
| 6                | 7                | 0              | 0.942727                | -0.000006 | -0.000016 |
| 7                | 1                | 0              | 1.051679                | 2.071756  | -0.314909 |
| 8                | 1                | 0              | 3.531257                | 2.145335  | -0.327519 |
| 9                | 1                | 0              | 3.531249                | -2.145366 | 0.327418  |
| 10               | 1                | 0              | 1.051672                | -2.071769 | 0.314874  |
| 11               | 6                | 0              | 5.172422                | -0.000022 | -0.000072 |
| 12               | 7                | 0              | 6.335976                | -0.000025 | -0.000087 |
| 13               | 5                | 0              | -0.497292               | 0.000000  | 0.000005  |
| 14               | 8                | 0              | -1.235849               | -1.129146 | 0.227042  |
| 15               | 8                | 0              | -1.235845               | 1.129154  | -0.227011 |
| 16               | 6                | 0              | -2.601367               | -0.776254 | -0.104468 |
| 17               | 6                | 0              | -2.601356               | 0.776276  | 0.104543  |
| 18               | 6                | 0              | -3.542222               | -1.540887 | 0.809991  |
| 19               | 1                | 0              | -4.576183               | -1.223153 | 0.642282  |
| 20               | 1                | 0              | -3.473353               | -2.609868 | 0.594657  |
| 21               | 1                | 0              | -3.290618               | -1.385312 | 1.859912  |
| 22               | 6                | 0              | -2.822209               | -1.174404 | -1.561111 |
| 23               | 1                | 0              | -2.597029               | -2.237333 | -1.673512 |
| 24               | 1                | 0              | -3.857039               | -1.002112 | -1.868613 |
| 25               | 1                | 0              | -2.161107               | -0.609992 | -2.225328 |
| 26               | 6                | 0              | -3.542231               | 1.540919  | -0.809886 |
| 27               | 1                | 0              | -4.576192               | 1.223209  | -0.642133 |
| 28               | 1                | 0              | -3.473330               | 2.609901  | -0.594564 |
| 29               | 1                | 0              | -3.290672               | 1.385330  | -1.859815 |
| 30               | 6                | 0              | -2.822149               | 1.174428  | 1.561193  |
| 31               | 1                | 0              | -2.596958               | 2.237355  | 1.673587  |
| 32               | 1                | 0              | -3.856970               | 1.002143  | 1.868728  |
| 33               | 1                | 0              | -2.161030               | 0.610012  | 2.225389  |

---

**B: 4-(4-pyridinyl)benzonitrile**

Thermal correction to Energy= 0.180854

Thermal correction to Enthalpy= 0.181798

Thermal correction to Gibbs Free Energy= 0.133081  
 Sum of electronic and zero-point Energies= -571.188782  
 Sum of electronic and thermal Energies= -571.178245  
 Sum of electronic and thermal Enthalpies= -571.177301  
 Sum of electronic and thermal Free Energies= -571.226018

Esol = -571.5545936

---

| Center<br>Number | Atomic<br>Number | Atomic<br>Type | Coordinates (Angstroms) |           |           |
|------------------|------------------|----------------|-------------------------|-----------|-----------|
|                  |                  |                | X                       | Y         | Z         |
| 1                | 6                | 0              | 1.072497                | -0.693676 | -0.377266 |
| 2                | 6                | 0              | 1.125867                | 0.696151  | -0.394840 |
| 3                | 6                | 0              | -1.125826               | 0.695811  | 0.392822  |
| 4                | 6                | 0              | -1.072641               | -0.693997 | 0.373539  |
| 5                | 7                | 0              | -0.000119               | -1.392921 | -0.002300 |
| 6                | 1                | 0              | 1.938313                | -1.274689 | -0.686192 |
| 7                | 1                | 0              | 2.023018                | 1.202278  | -0.736525 |
| 8                | 1                | 0              | -2.022906               | 1.201635  | 0.735141  |
| 9                | 1                | 0              | -1.938531               | -1.275276 | 0.681755  |
| 10               | 6                | 0              | 0.000070                | 1.423185  | -0.000560 |
| 11               | 6                | 0              | 0.000168                | 2.905975  | 0.000379  |
| 12               | 6                | 0              | 1.144225                | 3.616519  | 0.382208  |
| 13               | 6                | 0              | -1.143809               | 3.617149  | -0.380532 |
| 14               | 6                | 0              | 1.150084                | 5.003510  | 0.385946  |
| 15               | 1                | 0              | 2.028635                | 3.074768  | 0.702292  |
| 16               | 6                | 0              | -1.149512               | 5.004143  | -0.382468 |
| 17               | 1                | 0              | -2.028281               | 3.075911  | -0.701318 |
| 18               | 6                | 0              | 0.000323                | 5.701071  | 0.002203  |
| 19               | 1                | 0              | 2.034182                | 5.552988  | 0.689605  |
| 20               | 1                | 0              | -2.033548               | 5.554116  | -0.685405 |
| 21               | 6                | 0              | 0.000389                | 7.140436  | 0.003208  |
| 22               | 7                | 0              | 0.000459                | 8.297595  | 0.004063  |

---

### TSB1

Thermal correction to Energy= 0.569359  
 Thermal correction to Enthalpy= 0.570303  
 Thermal correction to Gibbs Free Energy= 0.476528  
 Sum of electronic and zero-point Energies= -1393.052164  
 Sum of electronic and thermal Energies= -1393.021374  
 Sum of electronic and thermal Enthalpies= -1393.020430  
 Sum of electronic and thermal Free Energies= -1393.114205

Esol = -1394.0745723

---

| Center<br>Number | Atomic<br>Number | Atomic<br>Type | Coordinates (Angstroms) |           |           |
|------------------|------------------|----------------|-------------------------|-----------|-----------|
|                  |                  |                | X                       | Y         | Z         |
| 1                | 6                | 0              | -1.462530               | -0.536241 | -1.240776 |
| 2                | 6                | 0              | -1.444714               | -0.981093 | 1.116228  |
| 3                | 6                | 0              | -0.075034               | -0.541531 | -1.206450 |
| 4                | 1                | 0              | -1.983265               | -0.382873 | -2.179865 |
| 5                | 6                | 0              | -0.056687               | -0.969022 | 1.060892  |
| 6                | 1                | 0              | -1.950230               | -1.127610 | 2.064688  |
| 7                | 1                | 0              | 0.535700                | -0.361170 | -2.087605 |
| 8                | 1                | 0              | 0.572583                | -1.115826 | 1.935570  |
| 9                | 7                | 0              | 0.601766                | -0.758662 | -0.077967 |
| 10               | 6                | 0              | 1.487796                | 3.352821  | -0.615182 |
| 11               | 6                | 0              | 1.051716                | 3.097004  | 0.860931  |
| 12               | 5                | 0              | 2.170400                | 1.283280  | 0.061869  |
| 13               | 8                | 0              | 1.856792                | 2.032259  | -1.056025 |
| 14               | 8                | 0              | 1.852597                | 1.956981  | 1.224608  |
| 15               | 6                | 0              | 1.339223                | 4.238611  | 1.822800  |
| 16               | 1                | 0              | 0.807065                | 5.145074  | 1.516063  |
| 17               | 1                | 0              | 1.001996                | 3.965323  | 2.825762  |
| 18               | 1                | 0              | 2.407296                | 4.455167  | 1.870263  |
| 19               | 6                | 0              | 2.735871                | 4.227416  | -0.721064 |
| 20               | 1                | 0              | 3.106743                | 4.185423  | -1.747768 |
| 21               | 1                | 0              | 2.520866                | 5.269332  | -0.466960 |
| 22               | 1                | 0              | 3.523120                | 3.858181  | -0.057957 |
| 23               | 6                | 0              | 0.389694                | 3.884135  | -1.523820 |
| 24               | 1                | 0              | 0.014387                | 4.845429  | -1.157960 |
| 25               | 1                | 0              | 0.788512                | 4.032238  | -2.530480 |
| 26               | 1                | 0              | -0.442774               | 3.180422  | -1.586913 |
| 27               | 6                | 0              | -0.409551               | 2.660186  | 0.976501  |
| 28               | 1                | 0              | -0.583120               | 2.284143  | 1.988035  |
| 29               | 1                | 0              | -1.096810               | 3.489839  | 0.786847  |
| 30               | 1                | 0              | -0.630981               | 1.853143  | 0.269388  |
| 31               | 6                | 0              | 3.535940                | -2.279132 | -0.825444 |
| 32               | 6                | 0              | 3.874709                | -2.136498 | 0.694759  |
| 33               | 5                | 0              | 2.604506                | -0.361834 | -0.002723 |
| 34               | 8                | 0              | 3.103917                | -0.955568 | -1.169336 |
| 35               | 8                | 0              | 2.972637                | -1.111048 | 1.130998  |
| 36               | 6                | 0              | 3.640039                | -3.393575 | 1.520209  |
| 37               | 1                | 0              | 4.263816                | -4.218490 | 1.160155  |
| 38               | 1                | 0              | 3.900828                | -3.197754 | 2.563607  |

|    |   |   |           |           |           |
|----|---|---|-----------|-----------|-----------|
| 39 | 1 | 0 | 2.593476  | -3.701887 | 1.482337  |
| 40 | 6 | 0 | 2.385456  | -3.254837 | -1.085980 |
| 41 | 1 | 0 | 2.045666  | -3.124165 | -2.117297 |
| 42 | 1 | 0 | 2.707022  | -4.292472 | -0.955015 |
| 43 | 1 | 0 | 1.541517  | -3.065702 | -0.419298 |
| 44 | 6 | 0 | 4.721073  | -2.645405 | -1.708538 |
| 45 | 1 | 0 | 5.153248  | -3.603881 | -1.402243 |
| 46 | 1 | 0 | 4.388692  | -2.735533 | -2.746158 |
| 47 | 1 | 0 | 5.494814  | -1.877684 | -1.665503 |
| 48 | 6 | 0 | 5.292742  | -1.613078 | 0.929590  |
| 49 | 1 | 0 | 5.391551  | -1.336945 | 1.982109  |
| 50 | 1 | 0 | 6.051169  | -2.364125 | 0.689707  |
| 51 | 1 | 0 | 5.475086  | -0.721041 | 0.323816  |
| 52 | 6 | 0 | -2.174362 | -0.757579 | -0.055542 |
| 53 | 6 | 0 | -3.656411 | -0.743978 | -0.042141 |
| 54 | 6 | 0 | -4.368331 | -1.651339 | 0.750867  |
| 55 | 6 | 0 | -4.363147 | 0.179495  | -0.821264 |
| 56 | 6 | 0 | -5.755400 | -1.642197 | 0.765946  |
| 57 | 1 | 0 | -3.829604 | -2.386443 | 1.340217  |
| 58 | 6 | 0 | -5.750085 | 0.200143  | -0.811131 |
| 59 | 1 | 0 | -3.819181 | 0.904470  | -1.418491 |
| 60 | 6 | 0 | -6.449402 | -0.713730 | -0.016407 |
| 61 | 1 | 0 | -6.307049 | -2.351616 | 1.372483  |
| 62 | 1 | 0 | -6.297391 | 0.921907  | -1.406955 |
| 63 | 6 | 0 | -7.888634 | -0.698091 | -0.003141 |
| 64 | 7 | 0 | -9.045572 | -0.685338 | 0.007491  |

---

### IntB1

|                                              |              |
|----------------------------------------------|--------------|
| Thermal correction to Energy=                | 0.570737     |
| Thermal correction to Enthalpy=              | 0.571681     |
| Thermal correction to Gibbs Free Energy=     | 0.477369     |
| Sum of electronic and zero-point Energies=   | -1393.054236 |
| Sum of electronic and thermal Energies=      | -1393.023229 |
| Sum of electronic and thermal Enthalpies=    | -1393.022285 |
| Sum of electronic and thermal Free Energies= | -1393.116597 |

Esol = -1394.0781288

---

| Center<br>Number | Atomic<br>Number | Atomic<br>Type | Coordinates (Angstroms) |   |   |
|------------------|------------------|----------------|-------------------------|---|---|
|                  |                  |                | X                       | Y | Z |

---

|    |   |   |           |           |           |
|----|---|---|-----------|-----------|-----------|
| 1  | 6 | 0 | -1.147805 | 1.966982  | -3.254207 |
| 2  | 6 | 0 | -1.548411 | 3.249566  | -1.269754 |
| 3  | 6 | 0 | -1.073487 | 0.835521  | -2.461151 |
| 4  | 1 | 0 | -1.043317 | 1.878620  | -4.329742 |
| 5  | 6 | 0 | -1.464198 | 2.073161  | -0.541041 |
| 6  | 1 | 0 | -1.714248 | 4.190597  | -0.757040 |
| 7  | 1 | 0 | -0.892411 | -0.157738 | -2.857904 |
| 8  | 1 | 0 | -1.585663 | 2.017207  | 0.536233  |
| 9  | 7 | 0 | -1.226089 | 0.900735  | -1.135351 |
| 10 | 6 | 0 | 2.677235  | -1.179976 | -1.448397 |
| 11 | 6 | 0 | 2.750906  | -1.711282 | 0.017020  |
| 12 | 5 | 0 | 0.661106  | -0.895982 | -0.406773 |
| 13 | 8 | 0 | 1.464343  | -0.401625 | -1.426478 |
| 14 | 8 | 0 | 1.361699  | -1.779066 | 0.387604  |
| 15 | 6 | 0 | 3.373851  | -3.090398 | 0.165606  |
| 16 | 1 | 0 | 4.409262  | -3.086274 | -0.190958 |
| 17 | 1 | 0 | 3.375215  | -3.377820 | 1.220014  |
| 18 | 1 | 0 | 2.810946  | -3.841194 | -0.391028 |
| 19 | 6 | 0 | 2.469534  | -2.297015 | -2.470753 |
| 20 | 1 | 0 | 2.221932  | -1.848372 | -3.436371 |
| 21 | 1 | 0 | 3.369333  | -2.907184 | -2.590593 |
| 22 | 1 | 0 | 1.640362  | -2.943796 | -2.170086 |
| 23 | 6 | 0 | 3.836046  | -0.288609 | -1.865876 |
| 24 | 1 | 0 | 4.783377  | -0.834375 | -1.805785 |
| 25 | 1 | 0 | 3.694350  | 0.036707  | -2.899982 |
| 26 | 1 | 0 | 3.899925  | 0.598393  | -1.233768 |
| 27 | 6 | 0 | 3.419135  | -0.721955 | 0.970924  |
| 28 | 1 | 0 | 3.246914  | -1.055624 | 1.996829  |
| 29 | 1 | 0 | 4.497374  | -0.658272 | 0.797518  |
| 30 | 1 | 0 | 2.983827  | 0.275193  | 0.858782  |
| 31 | 6 | 0 | -3.046788 | -1.623823 | -0.060154 |
| 32 | 6 | 0 | -2.536555 | -1.219407 | 1.359190  |
| 33 | 5 | 0 | -1.016619 | -0.531579 | -0.233559 |
| 34 | 8 | 0 | -1.858117 | -1.532946 | -0.843984 |
| 35 | 8 | 0 | -1.564460 | -0.217475 | 1.065150  |
| 36 | 6 | 0 | -3.601866 | -0.629323 | 2.272087  |
| 37 | 1 | 0 | -4.411328 | -1.347494 | 2.441643  |
| 38 | 1 | 0 | -3.157894 | -0.380447 | 3.239935  |
| 39 | 1 | 0 | -4.025203 | 0.283028  | 1.846331  |
| 40 | 6 | 0 | -4.085956 | -0.637253 | -0.604072 |
| 41 | 1 | 0 | -4.203493 | -0.810948 | -1.677579 |
| 42 | 1 | 0 | -5.059497 | -0.768116 | -0.121312 |
| 43 | 1 | 0 | -3.765508 | 0.398035  | -0.455005 |
| 44 | 6 | 0 | -3.585336 | -3.044535 | -0.158126 |



|    |   |   |           |           |           |
|----|---|---|-----------|-----------|-----------|
| 45 | 1 | 0 | -4.419264 | -3.196457 | 0.535828  |
| 46 | 1 | 0 | -3.945704 | -3.233803 | -1.173381 |
| 47 | 1 | 0 | -2.800854 | -3.769202 | 0.065644  |
| 48 | 6 | 0 | -1.818355 | -2.375851 | 2.058698  |
| 49 | 1 | 0 | -1.296592 | -1.979747 | 2.933566  |
| 50 | 1 | 0 | -2.515556 | -3.153200 | 2.386393  |
| 51 | 1 | 0 | -1.072134 | -2.816976 | 1.391635  |
| 52 | 6 | 0 | -1.380606 | 3.210445  | -2.657095 |
| 53 | 6 | 0 | -1.429583 | 4.446477  | -3.473057 |
| 54 | 6 | 0 | -2.365151 | 5.450478  | -3.199801 |
| 55 | 6 | 0 | -0.527720 | 4.622451  | -4.528662 |
| 56 | 6 | 0 | -2.404923 | 6.606120  | -3.966925 |
| 57 | 1 | 0 | -3.083971 | 5.312357  | -2.398256 |
| 58 | 6 | 0 | -0.554325 | 5.776646  | -5.297220 |
| 59 | 1 | 0 | 0.218925  | 3.860444  | -4.728624 |
| 60 | 6 | 0 | -1.496606 | 6.771003  | -5.017404 |
| 61 | 1 | 0 | -3.137314 | 7.379741  | -3.764936 |
| 62 | 1 | 0 | 0.152589  | 5.918678  | -6.106879 |
| 63 | 6 | 0 | -1.530876 | 7.969430  | -5.814069 |
| 64 | 7 | 0 | -1.557477 | 8.931847  | -6.455662 |

---

## TSB2

|                                              |              |
|----------------------------------------------|--------------|
| Thermal correction to Energy=                | 0.752329     |
| Thermal correction to Enthalpy=              | 0.753273     |
| Thermal correction to Gibbs Free Energy=     | 0.632526     |
| Sum of electronic and zero-point Energies=   | -1964.257741 |
| Sum of electronic and thermal Energies=      | -1964.215234 |
| Sum of electronic and thermal Enthalpies=    | -1964.214290 |
| Sum of electronic and thermal Free Energies= | -1964.335037 |

Esol = -1965.6397985

---

| Center<br>Number | Atomic<br>Number | Atomic<br>Type | Coordinates (Angstroms) |          |           |
|------------------|------------------|----------------|-------------------------|----------|-----------|
|                  |                  |                | X                       | Y        | Z         |
| 1                | 6                | 0              | 0.381638                | 2.614239 | -0.232366 |
| 2                | 6                | 0              | 1.296894                | 0.903234 | 1.172240  |
| 3                | 6                | 0              | -0.877451               | 2.091716 | 0.012942  |
| 4                | 1                | 0              | 0.483592                | 3.495584 | -0.855887 |
| 5                | 6                | 0              | 0.006344                | 0.442037 | 1.380448  |
| 6                | 1                | 0              | 2.134368                | 0.379880 | 1.622093  |
| 7                | 1                | 0              | -1.784920               | 2.489896 | -0.429088 |

|    |   |   |           |           |           |
|----|---|---|-----------|-----------|-----------|
| 8  | 1 | 0 | -0.238411 | -0.414046 | 2.001733  |
| 9  | 7 | 0 | -1.047711 | 1.022388  | 0.798819  |
| 10 | 6 | 0 | -3.950761 | 0.552450  | -2.707206 |
| 11 | 6 | 0 | -4.401079 | -0.904876 | -2.380591 |
| 12 | 5 | 0 | -2.971988 | -0.149927 | -0.755481 |
| 13 | 8 | 0 | -2.797815 | 0.715175  | -1.867223 |
| 14 | 8 | 0 | -4.027533 | -1.032662 | -1.003347 |
| 15 | 6 | 0 | -5.898529 | -1.148711 | -2.501201 |
| 16 | 1 | 0 | -6.247508 | -0.945071 | -3.519453 |
| 17 | 1 | 0 | -6.118365 | -2.193676 | -2.266524 |
| 18 | 1 | 0 | -6.453166 | -0.519497 | -1.803117 |
| 19 | 6 | 0 | -4.976874 | 1.592094  | -2.252728 |
| 20 | 1 | 0 | -4.525483 | 2.584928  | -2.331899 |
| 21 | 1 | 0 | -5.882484 | 1.572626  | -2.866174 |
| 22 | 1 | 0 | -5.243836 | 1.424208  | -1.204733 |
| 23 | 6 | 0 | -3.557800 | 0.788814  | -4.157122 |
| 24 | 1 | 0 | -4.402010 | 0.588542  | -4.825272 |
| 25 | 1 | 0 | -3.257593 | 1.831763  | -4.292053 |
| 26 | 1 | 0 | -2.721424 | 0.150348  | -4.449260 |
| 27 | 6 | 0 | -3.635244 | -1.952075 | -3.190431 |
| 28 | 1 | 0 | -3.807783 | -2.933383 | -2.740346 |
| 29 | 1 | 0 | -3.973207 | -1.979632 | -4.230979 |
| 30 | 1 | 0 | -2.561290 | -1.753650 | -3.171950 |
| 31 | 6 | 0 | -3.728928 | 1.106698  | 2.726000  |
| 32 | 6 | 0 | -3.528053 | -0.437445 | 2.846655  |
| 33 | 5 | 0 | -2.602637 | 0.316427  | 0.863912  |
| 34 | 8 | 0 | -3.514462 | 1.332147  | 1.336022  |
| 35 | 8 | 0 | -2.483524 | -0.689588 | 1.906804  |
| 36 | 6 | 0 | -3.084302 | -0.914545 | 4.222639  |
| 37 | 1 | 0 | -3.830184 | -0.662508 | 4.984015  |
| 38 | 1 | 0 | -2.963496 | -2.001551 | 4.212192  |
| 39 | 1 | 0 | -2.129219 | -0.466779 | 4.506634  |
| 40 | 6 | 0 | -2.685706 | 1.890288  | 3.530269  |
| 41 | 1 | 0 | -2.699817 | 2.931462  | 3.196183  |
| 42 | 1 | 0 | -2.897169 | 1.864804  | 4.603995  |
| 43 | 1 | 0 | -1.679998 | 1.491476  | 3.368278  |
| 44 | 6 | 0 | -5.126464 | 1.593330  | 3.084571  |
| 45 | 1 | 0 | -5.387700 | 1.325848  | 4.114281  |
| 46 | 1 | 0 | -5.170530 | 2.682335  | 2.992514  |
| 47 | 1 | 0 | -5.866712 | 1.165139  | 2.406671  |
| 48 | 6 | 0 | -4.765985 | -1.213005 | 2.390086  |
| 49 | 1 | 0 | -4.499113 | -2.269780 | 2.299072  |
| 50 | 1 | 0 | -5.591543 | -1.122979 | 3.103078  |
| 51 | 1 | 0 | -5.092274 | -0.863996 | 1.406301  |

|    |   |   |           |           |           |
|----|---|---|-----------|-----------|-----------|
| 52 | 6 | 0 | -0.186597 | -0.811160 | -1.694465 |
| 53 | 6 | 0 | 1.126938  | -1.212213 | -1.487261 |
| 54 | 6 | 0 | 0.296773  | -2.804043 | 0.098343  |
| 55 | 6 | 0 | -0.984088 | -2.331228 | -0.165051 |
| 56 | 1 | 0 | -0.449450 | -0.003599 | -2.375770 |
| 57 | 1 | 0 | 1.939837  | -0.709439 | -2.002098 |
| 58 | 1 | 0 | 0.441043  | -3.613161 | 0.806552  |
| 59 | 7 | 0 | -1.215106 | -1.352867 | -1.041005 |
| 60 | 1 | 0 | -1.858311 | -2.704824 | 0.360800  |
| 61 | 6 | 0 | 1.504500  | 2.009433  | 0.343408  |
| 62 | 6 | 0 | 1.386652  | -2.228908 | -0.561967 |
| 63 | 6 | 0 | 2.775166  | -2.653170 | -0.263039 |
| 64 | 6 | 0 | 3.148316  | -2.969007 | 1.049160  |
| 65 | 6 | 0 | 3.735531  | -2.731510 | -1.278453 |
| 66 | 6 | 0 | 4.447957  | -3.352807 | 1.345361  |
| 67 | 1 | 0 | 2.415680  | -2.892389 | 1.847021  |
| 68 | 6 | 0 | 5.037602  | -3.116505 | -0.994546 |
| 69 | 1 | 0 | 3.451655  | -2.512463 | -2.302956 |
| 70 | 6 | 0 | 5.396973  | -3.426552 | 0.321039  |
| 71 | 1 | 0 | 4.737027  | -3.590469 | 2.363134  |
| 72 | 1 | 0 | 5.778798  | -3.186897 | -1.782959 |
| 73 | 6 | 0 | 2.870432  | 2.515797  | 0.071926  |
| 74 | 6 | 0 | 3.211990  | 2.979535  | -1.203776 |
| 75 | 6 | 0 | 3.837099  | 2.531961  | 1.083862  |
| 76 | 6 | 0 | 4.490136  | 3.449544  | -1.467479 |
| 77 | 1 | 0 | 2.475706  | 2.949475  | -2.001142 |
| 78 | 6 | 0 | 5.117015  | 3.003444  | 0.832272  |
| 79 | 1 | 0 | 3.574710  | 2.197926  | 2.082665  |
| 80 | 6 | 0 | 5.445743  | 3.463050  | -0.446833 |
| 81 | 1 | 0 | 4.757692  | 3.801524  | -2.457545 |
| 82 | 1 | 0 | 5.863075  | 3.026792  | 1.618888  |
| 83 | 6 | 0 | 6.748177  | -3.819580 | 0.623252  |
| 84 | 7 | 0 | 7.834860  | -4.131894 | 0.868998  |
| 85 | 6 | 0 | 6.771937  | 3.954643  | -0.713988 |
| 86 | 7 | 0 | 7.837084  | 4.351283  | -0.930086 |

---

## IntB2

|                                            |              |
|--------------------------------------------|--------------|
| Thermal correction to Energy=              | 0.754238     |
| Thermal correction to Enthalpy=            | 0.755183     |
| Thermal correction to Gibbs Free Energy=   | 0.636225     |
| Sum of electronic and zero-point Energies= | -1964.260722 |
| Sum of electronic and thermal Energies=    | -1964.218245 |
| Sum of electronic and thermal Enthalpies=  | -1964.217301 |

Sum of electronic and thermal Free Energies= -1964.336259

Esol = -1965.644001

---

| Center<br>Number | Atomic<br>Number | Atomic<br>Type | Coordinates (Angstroms) |           |           |
|------------------|------------------|----------------|-------------------------|-----------|-----------|
|                  |                  |                | X                       | Y         | Z         |
| 1                | 6                | 0              | -0.876628               | 2.109216  | -3.203908 |
| 2                | 6                | 0              | -1.527705               | 3.451896  | -1.329518 |
| 3                | 6                | 0              | -0.857827               | 1.008741  | -2.365679 |
| 4                | 1                | 0              | -0.655966               | 1.982187  | -4.257823 |
| 5                | 6                | 0              | -1.497121               | 2.306217  | -0.550062 |
| 6                | 1                | 0              | -1.775774               | 4.404386  | -0.873929 |
| 7                | 1                | 0              | -0.603109               | 0.006513  | -2.692500 |
| 8                | 1                | 0              | -1.736536               | 2.290247  | 0.509358  |
| 9                | 7                | 0              | -1.165244               | 1.116447  | -1.065537 |
| 10               | 6                | 0              | 2.467364                | -1.151699 | -1.302580 |
| 11               | 6                | 0              | 2.652055                | -1.675729 | 0.156996  |
| 12               | 5                | 0              | 0.871069                | -0.204392 | 0.078581  |
| 13               | 8                | 0              | 1.676359                | 0.021892  | -1.115464 |
| 14               | 8                | 0              | 1.391816                | -1.373164 | 0.747891  |
| 15               | 6                | 0              | 2.891818                | -3.174950 | 0.265548  |
| 16               | 1                | 0              | 3.785538                | -3.474306 | -0.293072 |
| 17               | 1                | 0              | 3.036293                | -3.448910 | 1.314631  |
| 18               | 1                | 0              | 2.031041                | -3.727659 | -0.114962 |
| 19               | 6                | 0              | 1.654657                | -2.128833 | -2.156102 |
| 20               | 1                | 0              | 1.400819                | -1.634043 | -3.099395 |
| 21               | 1                | 0              | 2.216277                | -3.038586 | -2.390247 |
| 22               | 1                | 0              | 0.724301                | -2.391794 | -1.642065 |
| 23               | 6                | 0              | 3.762333                | -0.776710 | -2.009220 |
| 24               | 1                | 0              | 4.432137                | -1.640488 | -2.080403 |
| 25               | 1                | 0              | 3.542033                | -0.432944 | -3.024050 |
| 26               | 1                | 0              | 4.280126                | 0.027345  | -1.482053 |
| 27               | 6                | 0              | 3.752724                | -0.913314 | 0.902824  |
| 28               | 1                | 0              | 3.668423                | -1.134336 | 1.970755  |
| 29               | 1                | 0              | 4.751601                | -1.206551 | 0.564659  |
| 30               | 1                | 0              | 3.643122                | 0.166435  | 0.762961  |
| 31               | 6                | 0              | -2.658996               | -1.668183 | -0.156275 |
| 32               | 6                | 0              | -2.472759               | -1.144626 | 1.303280  |
| 33               | 5                | 0              | -0.873807               | -0.201908 | -0.077922 |
| 34               | 8                | 0              | -1.397931               | -1.369235 | -0.747214 |
| 35               | 8                | 0              | -1.678538               | 0.026773  | 1.116057  |
| 36               | 6                | 0              | -3.766654               | -0.766056 | 2.009979  |

|    |   |   |           |           |           |
|----|---|---|-----------|-----------|-----------|
| 37 | 1 | 0 | -4.438767 | -1.628025 | 2.081275  |
| 38 | 1 | 0 | -3.545352 | -0.422819 | 3.024769  |
| 39 | 1 | 0 | -4.282360 | 0.039331  | 1.482802  |
| 40 | 6 | 0 | -3.757518 | -0.902656 | -0.902087 |
| 41 | 1 | 0 | -3.673726 | -1.123769 | -1.970040 |
| 42 | 1 | 0 | -4.757234 | -1.193208 | -0.564065 |
| 43 | 1 | 0 | -3.645025 | 0.176778  | -0.762076 |
| 44 | 6 | 0 | -2.903014 | -3.166724 | -0.264799 |
| 45 | 1 | 0 | -3.797463 | -3.463611 | 0.293969  |
| 46 | 1 | 0 | -3.048444 | -3.440253 | -1.313863 |
| 47 | 1 | 0 | -2.043710 | -3.721841 | 0.115537  |
| 48 | 6 | 0 | -1.662702 | -2.123967 | 2.156773  |
| 49 | 1 | 0 | -1.407360 | -1.629821 | 3.099998  |
| 50 | 1 | 0 | -2.226860 | -3.032106 | 2.391063  |
| 51 | 1 | 0 | -0.733150 | -2.389583 | 1.642643  |
| 52 | 6 | 0 | 1.500549  | 2.302279  | 0.550067  |
| 53 | 6 | 0 | 1.533609  | 3.448143  | 1.329155  |
| 54 | 6 | 0 | 0.880101  | 2.107346  | 3.204054  |
| 55 | 6 | 0 | 0.858915  | 1.006655  | 2.366181  |
| 56 | 1 | 0 | 1.739604  | 2.285497  | -0.509422 |
| 57 | 1 | 0 | 1.783518  | 4.399982  | 0.873214  |
| 58 | 1 | 0 | 0.659322  | 1.981123  | 4.258038  |
| 59 | 7 | 0 | 1.166226  | 1.113356  | 1.065935  |
| 60 | 1 | 0 | 0.602132  | 0.005073  | 2.693354  |
| 61 | 6 | 0 | -1.212916 | 3.366973  | -2.689440 |
| 62 | 6 | 0 | 1.218677  | 3.364306  | 2.689108  |
| 63 | 6 | 0 | 1.242729  | 4.564228  | 3.557418  |
| 64 | 6 | 0 | 0.283463  | 4.731089  | 4.563485  |
| 65 | 6 | 0 | 2.226514  | 5.545780  | 3.386897  |
| 66 | 6 | 0 | 0.301367  | 5.851681  | 5.380945  |
| 67 | 1 | 0 | -0.497369 | 3.987841  | 4.689910  |
| 68 | 6 | 0 | 2.256009  | 6.668375  | 4.201071  |
| 69 | 1 | 0 | 2.991762  | 5.413709  | 2.628618  |
| 70 | 6 | 0 | 1.290275  | 6.823947  | 5.200650  |
| 71 | 1 | 0 | -0.447765 | 5.984717  | 6.153349  |
| 72 | 1 | 0 | 3.024157  | 7.423075  | 4.074848  |
| 73 | 6 | 0 | -1.235371 | 4.566611  | -3.558180 |
| 74 | 6 | 0 | -0.276277 | 4.731959  | -4.564648 |
| 75 | 6 | 0 | -2.217911 | 5.549400  | -3.387653 |
| 76 | 6 | 0 | -0.293151 | 5.852323  | -5.382465 |
| 77 | 1 | 0 | 0.503623  | 3.987741  | -4.691160 |
| 78 | 6 | 0 | -2.246387 | 6.671759  | -4.202177 |
| 79 | 1 | 0 | -2.983078 | 5.418460  | -2.629096 |
| 80 | 6 | 0 | -1.280834 | 6.825839  | -5.202148 |

|    |   |   |           |          |           |
|----|---|---|-----------|----------|-----------|
| 81 | 1 | 0 | 0.455851  | 5.984213 | -6.155194 |
| 82 | 1 | 0 | -3.013634 | 7.427372 | -4.075942 |
| 83 | 6 | 0 | 1.312273  | 7.990000 | 6.044058  |
| 84 | 7 | 0 | 1.328429  | 8.929079 | 6.719733  |
| 85 | 6 | 0 | -1.301759 | 7.991624 | -6.045953 |
| 86 | 7 | 0 | -1.317060 | 8.930503 | -6.721925 |

---

### TSB3

|                                              |              |
|----------------------------------------------|--------------|
| Thermal correction to Energy=                | 0.752522     |
| Thermal correction to Enthalpy=              | 0.753466     |
| Thermal correction to Gibbs Free Energy=     | 0.635865     |
| Sum of electronic and zero-point Energies=   | -1964.251169 |
| Sum of electronic and thermal Energies=      | -1964.209117 |
| Sum of electronic and thermal Enthalpies=    | -1964.208172 |
| Sum of electronic and thermal Free Energies= | -1964.325774 |

Esol = -1965.631134

---

| Center<br>Number | Atomic<br>Number | Atomic<br>Type | Coordinates (Angstroms) |           |           |
|------------------|------------------|----------------|-------------------------|-----------|-----------|
|                  |                  |                | X                       | Y         | Z         |
| 1                | 6                | 0              | -0.040027               | 3.156941  | -0.595562 |
| 2                | 6                | 0              | -1.462291               | 1.311052  | -1.124746 |
| 3                | 6                | 0              | 1.048535                | 2.348355  | -0.760684 |
| 4                | 1                | 0              | 0.124590                | 4.206112  | -0.376825 |
| 5                | 6                | 0              | -0.337123               | 0.516556  | -1.259628 |
| 6                | 1                | 0              | -2.433152               | 0.847190  | -1.264902 |
| 7                | 1                | 0              | 2.070554                | 2.692544  | -0.668588 |
| 8                | 1                | 0              | -0.377192               | -0.523982 | -1.561218 |
| 9                | 7                | 0              | 0.917145                | 1.021200  | -1.083073 |
| 10               | 6                | 0              | 3.216139                | 1.413901  | 2.353333  |
| 11               | 6                | 0              | 3.866314                | -0.003747 | 2.490788  |
| 12               | 5                | 0              | 2.112878                | -0.111910 | 1.052022  |
| 13               | 8                | 0              | 1.956766                | 1.121097  | 1.722172  |
| 14               | 8                | 0              | 3.369731                | -0.693037 | 1.332431  |
| 15               | 6                | 0              | 5.385342                | -0.012258 | 2.444231  |
| 16               | 1                | 0              | 5.804478                | 0.595273  | 3.253086  |
| 17               | 1                | 0              | 5.749428                | -1.036441 | 2.561894  |
| 18               | 1                | 0              | 5.743141                | 0.372567  | 1.487538  |
| 19               | 6                | 0              | 4.013027                | 2.335264  | 1.431677  |
| 20               | 1                | 0              | 3.421352                | 3.237641  | 1.248156  |
| 21               | 1                | 0              | 4.957332                | 2.639820  | 1.892833  |

|    |   |   |           |           |           |
|----|---|---|-----------|-----------|-----------|
| 22 | 1 | 0 | 4.215770  | 1.845317  | 0.475006  |
| 23 | 6 | 0 | 2.939226  | 2.109704  | 3.678488  |
| 24 | 1 | 0 | 3.869950  | 2.269240  | 4.233071  |
| 25 | 1 | 0 | 2.484574  | 3.085704  | 3.489219  |
| 26 | 1 | 0 | 2.254020  | 1.528342  | 4.297435  |
| 27 | 6 | 0 | 3.360158  | -0.757574 | 3.721718  |
| 28 | 1 | 0 | 3.677958  | -1.800607 | 3.646554  |
| 29 | 1 | 0 | 3.757863  | -0.337733 | 4.650128  |
| 30 | 1 | 0 | 2.266653  | -0.734163 | 3.768090  |
| 31 | 6 | 0 | 3.866668  | 0.003439  | -2.490535 |
| 32 | 6 | 0 | 3.216310  | -1.414135 | -2.353195 |
| 33 | 5 | 0 | 2.113018  | 0.111785  | -1.052045 |
| 34 | 8 | 0 | 3.369973  | 0.692782  | -1.332258 |
| 35 | 8 | 0 | 1.956867  | -1.121190 | -1.722241 |
| 36 | 6 | 0 | 2.939539  | -2.109903 | -3.678399 |
| 37 | 1 | 0 | 3.870339  | -2.269552 | -4.232821 |
| 38 | 1 | 0 | 2.484735  | -3.085846 | -3.489208 |
| 39 | 1 | 0 | 2.254513  | -1.528456 | -4.297465 |
| 40 | 6 | 0 | 3.360804  | 0.757327  | -3.721548 |
| 41 | 1 | 0 | 3.678698  | 1.800327  | -3.646321 |
| 42 | 1 | 0 | 3.758633  | 0.337451  | -4.649889 |
| 43 | 1 | 0 | 2.267306  | 0.734027  | -3.768114 |
| 44 | 6 | 0 | 5.385691  | 0.011772  | -2.443728 |
| 45 | 1 | 0 | 5.804886  | -0.595840 | -3.252491 |
| 46 | 1 | 0 | 5.749922  | 1.035906  | -2.561369 |
| 47 | 1 | 0 | 5.743282  | -0.373060 | -1.486960 |
| 48 | 6 | 0 | 4.012938  | -2.335593 | -1.431408 |
| 49 | 1 | 0 | 3.421127  | -3.237903 | -1.247994 |
| 50 | 1 | 0 | 4.957288  | -2.640252 | -1.892403 |
| 51 | 1 | 0 | 4.215572  | -1.845677 | -0.474698 |
| 52 | 6 | 0 | -0.337333 | -0.516430 | 1.259297  |
| 53 | 6 | 0 | -1.462558 | -1.310834 | 1.124346  |
| 54 | 6 | 0 | -0.040407 | -3.156884 | 0.595435  |
| 55 | 6 | 0 | 1.048209  | -2.348383 | 0.760612  |
| 56 | 1 | 0 | -0.377343 | 0.524128  | 1.560827  |
| 57 | 1 | 0 | -2.433389 | -0.846871 | 1.264373  |
| 58 | 1 | 0 | 0.124144  | -4.206084 | 0.376785  |
| 59 | 7 | 0 | 0.916907  | -1.021202 | 1.082921  |
| 60 | 1 | 0 | 2.070206  | -2.692673 | 0.668645  |
| 61 | 6 | 0 | -1.353184 | 2.656379  | -0.771874 |
| 62 | 6 | 0 | -1.353538 | -2.656202 | 0.771600  |
| 63 | 6 | 0 | -2.537446 | 3.511281  | -0.589876 |
| 64 | 6 | 0 | -3.714912 | 3.276630  | -1.317694 |
| 65 | 6 | 0 | -2.519291 | 4.580057  | 0.319730  |

|    |   |   |           |           |           |
|----|---|---|-----------|-----------|-----------|
| 66 | 6 | 0 | -4.835370 | 4.071232  | -1.141055 |
| 67 | 1 | 0 | -3.741339 | 2.478701  | -2.052794 |
| 68 | 6 | 0 | -3.633426 | 5.383818  | 0.501190  |
| 69 | 1 | 0 | -1.630051 | 4.763701  | 0.913982  |
| 70 | 6 | 0 | -4.800286 | 5.131397  | -0.228017 |
| 71 | 1 | 0 | -5.738371 | 3.886171  | -1.712515 |
| 72 | 1 | 0 | -3.613191 | 6.202248  | 1.212563  |
| 73 | 6 | 0 | -2.537851 | -3.511047 | 0.589661  |
| 74 | 6 | 0 | -2.519711 | -4.579992 | -0.319747 |
| 75 | 6 | 0 | -3.715347 | -3.276199 | 1.317372  |
| 76 | 6 | 0 | -3.633878 | -5.383729 | -0.501115 |
| 77 | 1 | 0 | -1.630448 | -4.763805 | -0.913912 |
| 78 | 6 | 0 | -4.835839 | -4.070773 | 1.140821  |
| 79 | 1 | 0 | -3.741774 | -2.478138 | 2.052328  |
| 80 | 6 | 0 | -4.800765 | -5.131111 | 0.227983  |
| 81 | 1 | 0 | -3.613647 | -6.202297 | -1.212328 |
| 82 | 1 | 0 | -5.738858 | -3.885555 | 1.712201  |
| 83 | 6 | 0 | -5.960352 | 5.959601  | -0.039767 |
| 84 | 7 | 0 | -6.894498 | 6.625976  | 0.113151  |
| 85 | 6 | 0 | -5.960860 | -5.959296 | 0.039841  |
| 86 | 7 | 0 | -6.895034 | -6.625654 | -0.112984 |

### IntB3

|                                              |              |
|----------------------------------------------|--------------|
| Thermal correction to Energy=                | 0.584419     |
| Thermal correction to Enthalpy=              | 0.585364     |
| Thermal correction to Gibbs Free Energy=     | 0.490141     |
| Sum of electronic and zero-point Energies=   | -1502.542337 |
| Sum of electronic and thermal Energies=      | -1502.509748 |
| Sum of electronic and thermal Enthalpies=    | -1502.508803 |
| Sum of electronic and thermal Free Energies= | -1502.604026 |

Esol = -1503.6203191

| Center<br>Number | Atomic<br>Number | Atomic<br>Type | Coordinates (Angstroms) |          |           |
|------------------|------------------|----------------|-------------------------|----------|-----------|
|                  |                  |                | X                       | Y        | Z         |
| 1                | 6                | 0              | -1.192411               | 2.918531 | -0.064897 |
| 2                | 6                | 0              | -2.265922               | 0.855173 | -0.809719 |
| 3                | 6                | 0              | 0.017750                | 2.368775 | -0.277069 |
| 4                | 1                | 0              | -1.294106               | 3.935734 | 0.285978  |
| 5                | 6                | 0              | -0.963968               | 0.155567 | -0.535331 |
| 6                | 1                | 0              | -3.108999               | 0.298453 | -1.202832 |



|    |   |   |           |           |           |
|----|---|---|-----------|-----------|-----------|
| 7  | 1 | 0 | 0.943598  | 2.920113  | -0.155419 |
| 8  | 1 | 0 | -0.825382 | -0.704150 | -1.197988 |
| 9  | 7 | 0 | 0.159565  | 1.068443  | -0.739529 |
| 10 | 6 | 0 | 2.399557  | 1.473403  | 2.999795  |
| 11 | 6 | 0 | 3.261204  | 0.164621  | 3.064959  |
| 12 | 5 | 0 | 1.355574  | -0.217096 | 1.924984  |
| 13 | 8 | 0 | 1.116824  | 0.979379  | 2.547387  |
| 14 | 8 | 0 | 2.653518  | -0.658825 | 2.042750  |
| 15 | 6 | 0 | 4.730203  | 0.352394  | 2.728815  |
| 16 | 1 | 0 | 5.203630  | 1.030687  | 3.445580  |
| 17 | 1 | 0 | 5.241980  | -0.611951 | 2.779209  |
| 18 | 1 | 0 | 4.855815  | 0.760237  | 1.724315  |
| 19 | 6 | 0 | 2.902889  | 2.461933  | 1.953014  |
| 20 | 1 | 0 | 2.161819  | 3.258607  | 1.847194  |
| 21 | 1 | 0 | 3.850140  | 2.914096  | 2.260405  |
| 22 | 1 | 0 | 3.037030  | 1.980959  | 0.978552  |
| 23 | 6 | 0 | 2.204511  | 2.169772  | 4.336803  |
| 24 | 1 | 0 | 3.168698  | 2.482964  | 4.749644  |
| 25 | 1 | 0 | 1.587649  | 3.060427  | 4.195053  |
| 26 | 1 | 0 | 1.705452  | 1.519598  | 5.056463  |
| 27 | 6 | 0 | 3.103367  | -0.584015 | 4.386124  |
| 28 | 1 | 0 | 3.560946  | -1.571143 | 4.287754  |
| 29 | 1 | 0 | 3.590226  | -0.052629 | 5.208039  |
| 30 | 1 | 0 | 2.046465  | -0.719593 | 4.633978  |
| 31 | 6 | 0 | 3.437111  | 0.737400  | -2.235186 |
| 32 | 6 | 0 | 2.920858  | -0.742810 | -2.268869 |
| 33 | 5 | 0 | 1.387095  | 0.608614  | -1.308586 |
| 34 | 8 | 0 | 2.540299  | 1.358174  | -1.285844 |
| 35 | 8 | 0 | 1.515940  | -0.590416 | -1.958684 |
| 36 | 6 | 0 | 3.048389  | -1.425081 | -3.620960 |
| 37 | 1 | 0 | 4.098781  | -1.477570 | -3.924679 |
| 38 | 1 | 0 | 2.660603  | -2.444120 | -3.551800 |
| 39 | 1 | 0 | 2.484311  | -0.896130 | -4.390246 |
| 40 | 6 | 0 | 3.244598  | 1.463657  | -3.564159 |
| 41 | 1 | 0 | 3.432844  | 2.529066  | -3.413381 |
| 42 | 1 | 0 | 3.933457  | 1.090845  | -4.326623 |
| 43 | 1 | 0 | 2.220376  | 1.345188  | -3.929846 |
| 44 | 6 | 0 | 4.862980  | 0.902059  | -1.738421 |
| 45 | 1 | 0 | 5.560985  | 0.379437  | -2.400079 |
| 46 | 1 | 0 | 5.127288  | 1.962522  | -1.729988 |
| 47 | 1 | 0 | 4.977590  | 0.508020  | -0.726818 |
| 48 | 6 | 0 | 3.535918  | -1.608327 | -1.173878 |
| 49 | 1 | 0 | 3.005454  | -2.564025 | -1.150468 |
| 50 | 1 | 0 | 4.592618  | -1.807509 | -1.373236 |

|    |   |   |           |           |           |
|----|---|---|-----------|-----------|-----------|
| 51 | 1 | 0 | 3.442695  | -1.134676 | -0.190851 |
| 52 | 6 | 0 | -0.955623 | -0.376781 | 0.938995  |
| 53 | 6 | 0 | -2.050984 | -1.391630 | 1.116033  |
| 54 | 6 | 0 | -0.422711 | -3.103837 | 0.499804  |
| 55 | 6 | 0 | 0.582379  | -2.261421 | 0.802488  |
| 56 | 1 | 0 | -1.099686 | 0.484114  | 1.599023  |
| 57 | 1 | 0 | -3.038408 | -1.073711 | 1.430537  |
| 58 | 1 | 0 | -0.228543 | -4.112452 | 0.163155  |
| 59 | 7 | 0 | 0.345422  | -0.969108 | 1.248629  |
| 60 | 1 | 0 | 1.625171  | -2.557081 | 0.771565  |
| 61 | 6 | 0 | -2.367400 | 2.159121  | -0.486852 |
| 62 | 6 | 0 | -1.785168 | -2.675900 | 0.809525  |
| 63 | 6 | 0 | -2.822166 | -3.673264 | 0.881555  |
| 64 | 7 | 0 | -3.644721 | -4.486049 | 0.926494  |
| 65 | 6 | 0 | -3.619896 | 2.853224  | -0.643575 |
| 66 | 7 | 0 | -4.621534 | 3.422403  | -0.752386 |

---

### TSB3

|                                              |              |
|----------------------------------------------|--------------|
| Thermal correction to Energy=                | 0.580769     |
| Thermal correction to Enthalpy=              | 0.581713     |
| Thermal correction to Gibbs Free Energy=     | 0.485500     |
| Sum of electronic and zero-point Energies=   | -1502.501972 |
| Sum of electronic and thermal Energies=      | -1502.469157 |
| Sum of electronic and thermal Enthalpies=    | -1502.468213 |
| Sum of electronic and thermal Free Energies= | -1502.564426 |

Esol = -1503.5796455

---

| Center<br>Number | Atomic<br>Number | Atomic<br>Type | Coordinates (Angstroms) |           |           |
|------------------|------------------|----------------|-------------------------|-----------|-----------|
|                  |                  |                | X                       | Y         | Z         |
| 1                | 6                | 0              | 1.813266                | -0.721878 | -3.081922 |
| 2                | 6                | 0              | 3.295701                | 0.440979  | -1.557725 |
| 3                | 6                | 0              | 0.752098                | -0.205929 | -2.431409 |
| 4                | 1                | 0              | 1.657925                | -1.363977 | -3.939803 |
| 5                | 6                | 0              | 2.185340                | 0.850480  | -0.820900 |
| 6                | 1                | 0              | 4.281445                | 0.718931  | -1.199876 |
| 7                | 1                | 0              | -0.269332               | -0.373921 | -2.743638 |
| 8                | 1                | 0              | 2.255235                | 1.600607  | -0.042401 |
| 9                | 7                | 0              | 0.895381                | 0.642158  | -1.326602 |
| 10               | 6                | 0              | -1.468480               | -2.858782 | -0.354684 |
| 11               | 6                | 0              | -2.248458               | -2.351226 | 0.909340  |

---

|    |   |   |           |           |           |
|----|---|---|-----------|-----------|-----------|
| 12 | 5 | 0 | -0.239303 | -1.350731 | 0.795476  |
| 13 | 8 | 0 | -0.128427 | -2.359375 | -0.120751 |
| 14 | 8 | 0 | -1.513982 | -1.157179 | 1.274434  |
| 15 | 6 | 0 | -3.697073 | -1.974706 | 0.652669  |
| 16 | 1 | 0 | -4.266287 | -2.848325 | 0.320038  |
| 17 | 1 | 0 | -4.147312 | -1.605991 | 1.578162  |
| 18 | 1 | 0 | -3.773524 | -1.195051 | -0.106838 |
| 19 | 6 | 0 | -1.977210 | -2.236513 | -1.649976 |
| 20 | 1 | 0 | -1.272880 | -2.479213 | -2.449970 |
| 21 | 1 | 0 | -2.957412 | -2.640495 | -1.918846 |
| 22 | 1 | 0 | -2.054468 | -1.148492 | -1.561217 |
| 23 | 6 | 0 | -1.398097 | -4.371605 | -0.487604 |
| 24 | 1 | 0 | -2.404166 | -4.794108 | -0.573899 |
| 25 | 1 | 0 | -0.839655 | -4.630824 | -1.390092 |
| 26 | 1 | 0 | -0.895825 | -4.825681 | 0.367551  |
| 27 | 6 | 0 | -2.143244 | -3.306615 | 2.095937  |
| 28 | 1 | 0 | -2.537030 | -2.808968 | 2.985026  |
| 29 | 1 | 0 | -2.715573 | -4.221966 | 1.924615  |
| 30 | 1 | 0 | -1.100792 | -3.577540 | 2.288463  |
| 31 | 6 | 0 | -2.248562 | 2.351353  | -0.909353 |
| 32 | 6 | 0 | -1.468470 | 2.858989  | 0.354541  |
| 33 | 5 | 0 | -0.239335 | 1.350993  | -0.795679 |
| 34 | 8 | 0 | -1.514081 | 1.157298  | -1.274411 |
| 35 | 8 | 0 | -0.128361 | 2.359854  | 0.120304  |
| 36 | 6 | 0 | -1.398406 | 4.371808  | 0.487566  |
| 37 | 1 | 0 | -2.404561 | 4.794080  | 0.573985  |
| 38 | 1 | 0 | -0.839930 | 4.631101  | 1.390011  |
| 39 | 1 | 0 | -0.896324 | 4.826038  | -0.367620 |
| 40 | 6 | 0 | -2.143488 | 3.306673  | -2.096015 |
| 41 | 1 | 0 | -2.537277 | 2.808932  | -2.985051 |
| 42 | 1 | 0 | -2.715899 | 4.221978  | -1.924716 |
| 43 | 1 | 0 | -1.101073 | 3.577692  | -2.288609 |
| 44 | 6 | 0 | -3.697145 | 1.974840  | -0.652491 |
| 45 | 1 | 0 | -4.266279 | 2.848462  | -0.319727 |
| 46 | 1 | 0 | -4.147546 | 1.606182  | -1.577928 |
| 47 | 1 | 0 | -3.773493 | 1.195158  | 0.106996  |
| 48 | 6 | 0 | -1.976771 | 2.236381  | 1.649835  |
| 49 | 1 | 0 | -1.272196 | 2.478927  | 2.449658  |
| 50 | 1 | 0 | -2.956946 | 2.640158  | 1.919107  |
| 51 | 1 | 0 | -2.053919 | 1.148372  | 1.560703  |
| 52 | 6 | 0 | 2.185402  | -0.850334 | 0.820800  |
| 53 | 6 | 0 | 3.295764  | -0.440941 | 1.557669  |
| 54 | 6 | 0 | 1.813352  | 0.721461  | 3.082233  |
| 55 | 6 | 0 | 0.752175  | 0.205697  | 2.431587  |

|    |   |   |           |           |           |
|----|---|---|-----------|-----------|-----------|
| 56 | 1 | 0 | 2.255266  | -1.600335 | 0.042176  |
| 57 | 1 | 0 | 4.281503  | -0.718761 | 1.199703  |
| 58 | 1 | 0 | 1.658020  | 1.363261  | 3.940340  |
| 59 | 7 | 0 | 0.895449  | -0.642038 | 1.326499  |
| 60 | 1 | 0 | -0.269244 | 0.373517  | 2.743953  |
| 61 | 6 | 0 | 3.152845  | -0.376288 | -2.666508 |
| 62 | 6 | 0 | 3.152924  | 0.376058  | 2.666655  |
| 63 | 6 | 0 | 4.284493  | 0.862746  | 3.380465  |
| 64 | 7 | 0 | 5.199866  | 1.266103  | 3.969703  |
| 65 | 6 | 0 | 4.284359  | -0.863040 | -3.380257 |
| 66 | 7 | 0 | 5.199719  | -1.266481 | -3.969456 |

#### IntB4

|                                              |             |
|----------------------------------------------|-------------|
| Thermal correction to Energy=                | 0.375207    |
| Thermal correction to Enthalpy=              | 0.376151    |
| Thermal correction to Gibbs Free Energy=     | 0.302653    |
| Sum of electronic and zero-point Energies=   | -982.134825 |
| Sum of electronic and thermal Energies=      | -982.113789 |
| Sum of electronic and thermal Enthalpies=    | -982.112845 |
| Sum of electronic and thermal Free Energies= | -982.186344 |

Esol = -982.8317588

| Center<br>Number | Atomic<br>Number | Atomic<br>Type | Coordinates (Angstroms) |           |           |
|------------------|------------------|----------------|-------------------------|-----------|-----------|
|                  |                  |                | X                       | Y         | Z         |
| 1                | 6                | 0              | 2.311745                | 1.189839  | -0.083370 |
| 2                | 6                | 0              | 3.666733                | 1.202835  | -0.091005 |
| 3                | 6                | 0              | 3.666792                | -1.202611 | 0.090998  |
| 4                | 6                | 0              | 2.311803                | -1.189680 | 0.083379  |
| 5                | 7                | 0              | 1.589371                | 0.000062  | 0.000006  |
| 6                | 1                | 0              | 1.709027                | 2.088024  | -0.128736 |
| 7                | 1                | 0              | 4.155880                | 2.168878  | -0.128625 |
| 8                | 1                | 0              | 4.155986                | -2.168630 | 0.128615  |
| 9                | 1                | 0              | 1.709128                | -2.087893 | 0.128753  |
| 10               | 5                | 0              | 0.150216                | 0.000027  | 0.000000  |
| 11               | 8                | 0              | -0.588869               | -1.139615 | 0.167576  |
| 12               | 8                | 0              | -0.588925               | 1.139631  | -0.167587 |
| 13               | 6                | 0              | -1.954477               | -0.769890 | -0.142785 |
| 14               | 6                | 0              | -1.954522               | 0.769834  | 0.142742  |
| 15               | 6                | 0              | -2.894848               | -1.577471 | 0.734766  |
| 16               | 1                | 0              | -3.927244               | -1.241977 | 0.594277  |

|    |   |   |           |           |           |
|----|---|---|-----------|-----------|-----------|
| 17 | 1 | 0 | -2.837670 | -2.633289 | 0.459543  |
| 18 | 1 | 0 | -2.633021 | -1.483251 | 1.789506  |
| 19 | 6 | 0 | -2.177802 | -1.096839 | -1.617053 |
| 20 | 1 | 0 | -1.949873 | -2.152379 | -1.781289 |
| 21 | 1 | 0 | -3.213694 | -0.913294 | -1.914450 |
| 22 | 1 | 0 | -1.519590 | -0.499175 | -2.254489 |
| 23 | 6 | 0 | -2.894914 | 1.577364  | -0.734833 |
| 24 | 1 | 0 | -3.927293 | 1.241803  | -0.594383 |
| 25 | 1 | 0 | -2.837812 | 2.633184  | -0.459597 |
| 26 | 1 | 0 | -2.633045 | 1.483171  | -1.789564 |
| 27 | 6 | 0 | -2.177897 | 1.096774  | 1.617004  |
| 28 | 1 | 0 | -1.950020 | 2.152324  | 1.781244  |
| 29 | 1 | 0 | -3.213788 | 0.913182  | 1.914376  |
| 30 | 1 | 0 | -1.519673 | 0.499140  | 2.254456  |
| 31 | 6 | 0 | 4.437335  | 0.000130  | -0.000011 |
| 32 | 6 | 0 | 5.883453  | 0.000163  | -0.000028 |
| 33 | 6 | 0 | 6.623107  | 1.116552  | -0.456635 |
| 34 | 6 | 0 | 6.623168  | -1.116194 | 0.456557  |
| 35 | 6 | 0 | 8.004104  | 1.119639  | -0.457324 |
| 36 | 1 | 0 | 6.103800  | 1.983148  | -0.850382 |
| 37 | 6 | 0 | 8.004165  | -1.119223 | 0.457207  |
| 38 | 1 | 0 | 6.103909  | -1.982813 | 0.850318  |
| 39 | 6 | 0 | 8.714086  | 0.000224  | -0.000068 |
| 40 | 1 | 0 | 8.549220  | 1.984098  | -0.821547 |
| 41 | 1 | 0 | 8.549329  | -1.983659 | 0.821413  |
| 42 | 6 | 0 | 10.147850 | 0.000255  | -0.000089 |
| 43 | 7 | 0 | 11.306634 | 0.000282  | -0.000105 |

### C

|                                              |             |
|----------------------------------------------|-------------|
| Thermal correction to Energy=                | 0.180372    |
| Thermal correction to Enthalpy=              | 0.181316    |
| Thermal correction to Gibbs Free Energy=     | 0.137163    |
| Sum of electronic and zero-point Energies=   | -478.973939 |
| Sum of electronic and thermal Energies=      | -478.965238 |
| Sum of electronic and thermal Enthalpies=    | -478.964293 |
| Sum of electronic and thermal Free Energies= | -479.008447 |

Esol = -479.3061454

---

| Center<br>Number | Atomic<br>Number | Atomic<br>Type | Coordinates (Angstroms) |   |   |
|------------------|------------------|----------------|-------------------------|---|---|
|                  |                  |                | X                       | Y | Z |

---

|    |   |   |           |           |           |
|----|---|---|-----------|-----------|-----------|
| 1  | 6 | 0 | 1.073196  | -0.705476 | -0.372490 |
| 2  | 6 | 0 | 1.125712  | 0.684082  | -0.391043 |
| 3  | 6 | 0 | -1.125758 | 0.683735  | 0.388877  |
| 4  | 6 | 0 | -1.073340 | -0.705784 | 0.368684  |
| 5  | 7 | 0 | -0.000075 | -1.406667 | -0.002258 |
| 6  | 1 | 0 | 1.941023  | -1.285918 | -0.677772 |
| 7  | 1 | 0 | 2.023992  | 1.190585  | -0.729071 |
| 8  | 1 | 0 | -2.023773 | 1.189938  | 0.728036  |
| 9  | 1 | 0 | -1.940975 | -1.286505 | 0.673940  |
| 10 | 6 | 0 | -0.000037 | 1.414365  | -0.000829 |
| 11 | 6 | 0 | 0.000098  | 2.897056  | 0.000145  |
| 12 | 6 | 0 | 1.144076  | 3.608731  | 0.377213  |
| 13 | 6 | 0 | -1.143800 | 3.609460  | -0.375840 |
| 14 | 6 | 0 | 1.143722  | 4.999119  | 0.379534  |
| 15 | 1 | 0 | 2.029755  | 3.065984  | 0.694085  |
| 16 | 6 | 0 | -1.143165 | 4.999831  | -0.376190 |
| 17 | 1 | 0 | -2.029501 | 3.067284  | -0.693618 |
| 18 | 6 | 0 | 0.000329  | 5.698547  | 0.002252  |
| 19 | 1 | 0 | 2.035670  | 5.537948  | 0.682571  |
| 20 | 1 | 0 | -2.035005 | 5.539273  | -0.678420 |
| 21 | 1 | 0 | 0.000394  | 6.783647  | 0.003134  |

### TSC1

|                                              |              |
|----------------------------------------------|--------------|
| Thermal correction to Energy=                | 0.568892     |
| Thermal correction to Enthalpy=              | 0.569836     |
| Thermal correction to Gibbs Free Energy=     | 0.480506     |
| Sum of electronic and zero-point Energies=   | -1300.838309 |
| Sum of electronic and thermal Energies=      | -1300.809340 |
| Sum of electronic and thermal Enthalpies=    | -1300.808396 |
| Sum of electronic and thermal Free Energies= | -1300.897726 |

Esol = -1301.8270465

| Center<br>Number | Atomic<br>Number | Atomic<br>Type | Coordinates (Angstroms) |           |           |
|------------------|------------------|----------------|-------------------------|-----------|-----------|
|                  |                  |                | X                       | Y         | Z         |
| 1                | 6                | 0              | -1.893877               | -0.787741 | -1.212906 |
| 2                | 6                | 0              | -1.837285               | -1.094297 | 1.162674  |
| 3                | 6                | 0              | -0.509403               | -0.691980 | -1.187302 |
| 4                | 1                | 0              | -2.430784               | -0.673917 | -2.148607 |
| 5                | 6                | 0              | -0.454204               | -0.986266 | 1.097109  |
| 6                | 1                | 0              | -2.325515               | -1.272584 | 2.114733  |

|    |   |   |           |           |           |
|----|---|---|-----------|-----------|-----------|
| 7  | 1 | 0 | 0.079997  | -0.504794 | -2.081634 |
| 8  | 1 | 0 | 0.184449  | -1.048289 | 1.975360  |
| 9  | 7 | 0 | 0.187826  | -0.794459 | -0.054730 |
| 10 | 6 | 0 | 0.749096  | 3.330617  | -0.796442 |
| 11 | 6 | 0 | 0.330452  | 3.113116  | 0.691251  |
| 12 | 5 | 0 | 1.609529  | 1.367585  | -0.014079 |
| 13 | 8 | 0 | 1.239081  | 2.028752  | -1.168865 |
| 14 | 8 | 0 | 1.225809  | 2.067426  | 1.112787  |
| 15 | 6 | 0 | 0.515333  | 4.322681  | 1.593836  |
| 16 | 1 | 0 | -0.093119 | 5.162752  | 1.242986  |
| 17 | 1 | 0 | 0.200474  | 4.071398  | 2.609808  |
| 18 | 1 | 0 | 1.560356  | 4.633715  | 1.628825  |
| 19 | 6 | 0 | 1.913658  | 4.307989  | -0.947383 |
| 20 | 1 | 0 | 2.291044  | 4.247131  | -1.970790 |
| 21 | 1 | 0 | 1.604711  | 5.337946  | -0.746886 |
| 22 | 1 | 0 | 2.728141  | 4.045365  | -0.266537 |
| 23 | 6 | 0 | -0.388299 | 3.712355  | -1.731557 |
| 24 | 1 | 0 | -0.850911 | 4.653217  | -1.415907 |
| 25 | 1 | 0 | 0.000715  | 3.844285  | -2.744329 |
| 26 | 1 | 0 | -1.153052 | 2.933728  | -1.758398 |
| 27 | 6 | 0 | -1.088796 | 2.560021  | 0.829422  |
| 28 | 1 | 0 | -1.233061 | 2.222675  | 1.859283  |
| 29 | 1 | 0 | -1.842784 | 3.317985  | 0.597782  |
| 30 | 1 | 0 | -1.239348 | 1.702596  | 0.165029  |
| 31 | 6 | 0 | 3.275308  | -2.111963 | -0.703872 |
| 32 | 6 | 0 | 3.578520  | -1.872621 | 0.811988  |
| 33 | 5 | 0 | 2.208014  | -0.223790 | 0.009289  |
| 34 | 8 | 0 | 2.756824  | -0.840365 | -1.118418 |
| 35 | 8 | 0 | 2.609497  | -0.882743 | 1.182375  |
| 36 | 6 | 0 | 3.404580  | -3.098236 | 1.697571  |
| 37 | 1 | 0 | 4.082092  | -3.901406 | 1.389070  |
| 38 | 1 | 0 | 3.635498  | -2.834701 | 2.733097  |
| 39 | 1 | 0 | 2.378775  | -3.469740 | 1.660791  |
| 40 | 6 | 0 | 2.198974  | -3.175729 | -0.932802 |
| 41 | 1 | 0 | 1.874029  | -3.121369 | -1.975643 |
| 42 | 1 | 0 | 2.586218  | -4.180991 | -0.740845 |
| 43 | 1 | 0 | 1.329888  | -3.007371 | -0.293833 |
| 44 | 6 | 0 | 4.497518  | -2.435661 | -1.552450 |
| 45 | 1 | 0 | 4.987037  | -3.348663 | -1.197297 |
| 46 | 1 | 0 | 4.189212  | -2.593380 | -2.589401 |
| 47 | 1 | 0 | 5.218030  | -1.616817 | -1.533467 |
| 48 | 6 | 0 | 4.957800  | -1.252267 | 1.041731  |
| 49 | 1 | 0 | 5.021101  | -0.920632 | 2.080900  |
| 50 | 1 | 0 | 5.764553  | -1.965887 | 0.849938  |

|    |   |   |           |           |           |
|----|---|---|-----------|-----------|-----------|
| 51 | 1 | 0 | 5.096569  | -0.380463 | 0.396245  |
| 52 | 6 | 0 | -2.587886 | -0.990242 | -0.013358 |
| 53 | 6 | 0 | -4.066980 | -1.077769 | 0.010558  |
| 54 | 6 | 0 | -4.794394 | -0.492357 | 1.052387  |
| 55 | 6 | 0 | -4.757626 | -1.742156 | -1.008546 |
| 56 | 6 | 0 | -6.182481 | -0.569725 | 1.074004  |
| 57 | 1 | 0 | -4.267799 | 0.050058  | 1.832305  |
| 58 | 6 | 0 | -6.145472 | -1.823279 | -0.983467 |
| 59 | 1 | 0 | -4.200361 | -2.219658 | -1.809100 |
| 60 | 6 | 0 | -6.861219 | -1.236644 | 0.057136  |
| 61 | 1 | 0 | -6.735422 | -0.102548 | 1.882284  |
| 62 | 1 | 0 | -6.668518 | -2.350664 | -1.774429 |
| 63 | 1 | 0 | -7.944311 | -1.298389 | 0.075202  |

---

### IntC1

|                                              |              |
|----------------------------------------------|--------------|
| Thermal correction to Energy=                | 0.570174     |
| Thermal correction to Enthalpy=              | 0.571118     |
| Thermal correction to Gibbs Free Energy=     | 0.480374     |
| Sum of electronic and zero-point Energies=   | -1300.840996 |
| Sum of electronic and thermal Energies=      | -1300.811650 |
| Sum of electronic and thermal Enthalpies=    | -1300.810706 |
| Sum of electronic and thermal Free Energies= | -1300.901451 |

Esol = -1301.8310155

---

| Center<br>Number | Atomic<br>Number | Atomic<br>Type | Coordinates (Angstroms) |           |           |
|------------------|------------------|----------------|-------------------------|-----------|-----------|
|                  |                  |                | X                       | Y         | Z         |
| 1                | 6                | 0              | -1.110252               | 2.010370  | -3.263446 |
| 2                | 6                | 0              | -1.507762               | 3.276595  | -1.271501 |
| 3                | 6                | 0              | -1.002757               | 0.877938  | -2.475657 |
| 4                | 1                | 0              | -1.020831               | 1.925684  | -4.340384 |
| 5                | 6                | 0              | -1.396020               | 2.100868  | -0.547850 |
| 6                | 1                | 0              | -1.684548               | 4.211619  | -0.752128 |
| 7                | 1                | 0              | -0.809157               | -0.110321 | -2.878370 |
| 8                | 1                | 0              | -1.509620               | 2.041103  | 0.529647  |
| 9                | 7                | 0              | -1.147741               | 0.932575  | -1.147789 |
| 10               | 6                | 0              | 2.725043                | -1.280675 | -1.406099 |
| 11               | 6                | 0              | 2.767658                | -1.765294 | 0.076060  |
| 12               | 5                | 0              | 0.707180                | -0.903044 | -0.399363 |
| 13               | 8                | 0              | 1.537057                | -0.465760 | -1.423824 |
| 14               | 8                | 0              | 1.373917                | -1.780006 | 0.432227  |



|    |   |   |           |           |           |
|----|---|---|-----------|-----------|-----------|
| 15 | 6 | 0 | 3.347655  | -3.156695 | 0.277977  |
| 16 | 1 | 0 | 4.384758  | -3.197886 | -0.071266 |
| 17 | 1 | 0 | 3.333845  | -3.405826 | 1.341950  |
| 18 | 1 | 0 | 2.764614  | -3.909186 | -0.254970 |
| 19 | 6 | 0 | 2.493708  | -2.424493 | -2.393377 |
| 20 | 1 | 0 | 2.267564  | -2.000582 | -3.375073 |
| 21 | 1 | 0 | 3.376031  | -3.064373 | -2.484589 |
| 22 | 1 | 0 | 1.643220  | -3.036537 | -2.080063 |
| 23 | 6 | 0 | 3.915712  | -0.440211 | -1.840152 |
| 24 | 1 | 0 | 4.844879  | -1.012342 | -1.748901 |
| 25 | 1 | 0 | 3.796039  | -0.148148 | -2.886760 |
| 26 | 1 | 0 | 4.000300  | 0.466974  | -1.239966 |
| 27 | 6 | 0 | 3.455568  | -0.765206 | 1.005037  |
| 28 | 1 | 0 | 3.256744  | -1.056171 | 2.039015  |
| 29 | 1 | 0 | 4.537830  | -0.744299 | 0.846941  |
| 30 | 1 | 0 | 3.056599  | 0.241443  | 0.851336  |
| 31 | 6 | 0 | -3.007762 | -1.573246 | -0.116233 |
| 32 | 6 | 0 | -2.513046 | -1.182373 | 1.311909  |
| 33 | 5 | 0 | -0.962926 | -0.499270 | -0.257005 |
| 34 | 8 | 0 | -1.808727 | -1.491736 | -0.882903 |
| 35 | 8 | 0 | -1.526554 | -0.190550 | 1.038882  |
| 36 | 6 | 0 | -3.584812 | -0.585011 | 2.213265  |
| 37 | 1 | 0 | -4.405513 | -1.293753 | 2.367524  |
| 38 | 1 | 0 | -3.151669 | -0.346607 | 3.188538  |
| 39 | 1 | 0 | -3.990650 | 0.334804  | 1.786573  |
| 40 | 6 | 0 | -4.029917 | -0.573284 | -0.668788 |
| 41 | 1 | 0 | -4.133100 | -0.739472 | -1.744892 |
| 42 | 1 | 0 | -5.011757 | -0.697478 | -0.201181 |
| 43 | 1 | 0 | -3.701511 | 0.457733  | -0.509551 |
| 44 | 6 | 0 | -3.561035 | -2.987637 | -0.229642 |
| 45 | 1 | 0 | -4.408817 | -3.133173 | 0.448646  |
| 46 | 1 | 0 | -3.905883 | -3.167573 | -1.251883 |
| 47 | 1 | 0 | -2.789295 | -3.722766 | 0.003653  |
| 48 | 6 | 0 | -1.818308 | -2.350693 | 2.016228  |
| 49 | 1 | 0 | -1.310283 | -1.965627 | 2.903994  |
| 50 | 1 | 0 | -2.527490 | -3.125262 | 2.324476  |
| 51 | 1 | 0 | -1.061877 | -2.792416 | 1.361253  |
| 52 | 6 | 0 | -1.367197 | 3.248627  | -2.663276 |
| 53 | 6 | 0 | -1.489151 | 4.483435  | -3.472109 |
| 54 | 6 | 0 | -2.424835 | 5.465725  | -3.129537 |
| 55 | 6 | 0 | -0.672455 | 4.684855  | -4.590165 |
| 56 | 6 | 0 | -2.542862 | 6.623089  | -3.890520 |
| 57 | 1 | 0 | -3.082041 | 5.306932  | -2.279786 |
| 58 | 6 | 0 | -0.787708 | 5.845332  | -5.347129 |

|    |   |   |           |          |           |
|----|---|---|-----------|----------|-----------|
| 59 | 1 | 0 | 0.074987  | 3.940781 | -4.848898 |
| 60 | 6 | 0 | -1.723803 | 6.816290 | -5.000103 |
| 61 | 1 | 0 | -3.279934 | 7.372110 | -3.620603 |
| 62 | 1 | 0 | -0.141099 | 5.994545 | -6.205496 |
| 63 | 1 | 0 | -1.814711 | 7.720659 | -5.592634 |

---

## TSC2

|                                              |              |
|----------------------------------------------|--------------|
| Thermal correction to Energy=                | 0.751937     |
| Thermal correction to Enthalpy=              | 0.752881     |
| Thermal correction to Gibbs Free Energy=     | 0.641510     |
| Sum of electronic and zero-point Energies=   | -1779.829617 |
| Sum of electronic and thermal Energies=      | -1779.790834 |
| Sum of electronic and thermal Enthalpies=    | -1779.789889 |
| Sum of electronic and thermal Free Energies= | -1779.901260 |

Esol = -1781.1449941

---

| Center<br>Number | Atomic<br>Number | Atomic<br>Type | Coordinates (Angstroms) |           |           |
|------------------|------------------|----------------|-------------------------|-----------|-----------|
|                  |                  |                | X                       | Y         | Z         |
| 1                | 6                | 0              | -0.927504               | 1.694301  | 2.017512  |
| 2                | 6                | 0              | -1.844196               | 1.502168  | -0.184846 |
| 3                | 6                | 0              | 0.329563                | 1.493316  | 1.473332  |
| 4                | 1                | 0              | -1.028686               | 1.866639  | 3.083070  |
| 5                | 6                | 0              | -0.555404               | 1.320685  | -0.660734 |
| 6                | 1                | 0              | -2.682204               | 1.453903  | -0.872343 |
| 7                | 1                | 0              | 1.235653                | 1.447229  | 2.067985  |
| 8                | 1                | 0              | -0.315201               | 1.160485  | -1.707064 |
| 9                | 7                | 0              | 0.500356                | 1.303022  | 0.159545  |
| 10               | 6                | 0              | 3.324661                | -1.589364 | 2.295775  |
| 11               | 6                | 0              | 3.779925                | -2.372823 | 1.024845  |
| 12               | 5                | 0              | 2.398268                | -0.645257 | 0.419242  |
| 13               | 8                | 0              | 2.204400                | -0.835827 | 1.811938  |
| 14               | 8                | 0              | 3.441221                | -1.462926 | -0.027502 |
| 15               | 6                | 0              | 5.274046                | -2.657730 | 0.957742  |
| 16               | 1                | 0              | 5.597170                | -3.257609 | 1.815424  |
| 17               | 1                | 0              | 5.497597                | -3.216655 | 0.045094  |
| 18               | 1                | 0              | 5.847816                | -1.729795 | 0.936983  |
| 19               | 6                | 0              | 4.372068                | -0.574292 | 2.758308  |
| 20               | 1                | 0              | 3.924534                | 0.064498  | 3.524595  |
| 21               | 1                | 0              | 5.256491                | -1.059233 | 3.182085  |
| 22               | 1                | 0              | 4.673531                | 0.062455  | 1.921114  |

|    |   |   |           |           |           |
|----|---|---|-----------|-----------|-----------|
| 23 | 6 | 0 | 2.880611  | -2.463175 | 3.459231  |
| 24 | 1 | 0 | 3.700766  | -3.103965 | 3.799961  |
| 25 | 1 | 0 | 2.572613  | -1.830479 | 4.296355  |
| 26 | 1 | 0 | 2.036009  | -3.095568 | 3.178013  |
| 27 | 6 | 0 | 2.994102  | -3.668670 | 0.817232  |
| 28 | 1 | 0 | 3.187571  | -4.032064 | -0.195564 |
| 29 | 1 | 0 | 3.298553  | -4.440974 | 1.530578  |
| 30 | 1 | 0 | 1.920254  | -3.496108 | 0.916075  |
| 31 | 6 | 0 | 3.196481  | 2.695009  | -1.153859 |
| 32 | 6 | 0 | 2.979858  | 1.687689  | -2.327197 |
| 33 | 5 | 0 | 2.043865  | 0.837332  | -0.387607 |
| 34 | 8 | 0 | 2.973526  | 1.879479  | -0.009412 |
| 35 | 8 | 0 | 1.923974  | 0.863935  | -1.838361 |
| 36 | 6 | 0 | 2.547397  | 2.326706  | -3.640009 |
| 37 | 1 | 0 | 3.301071  | 3.037071  | -3.996484 |
| 38 | 1 | 0 | 2.423102  | 1.551805  | -4.401866 |
| 39 | 1 | 0 | 1.595969  | 2.851737  | -3.528672 |
| 40 | 6 | 0 | 2.168961  | 3.832661  | -1.171595 |
| 41 | 1 | 0 | 2.196646  | 4.340320  | -0.203424 |
| 42 | 1 | 0 | 2.385290  | 4.564527  | -1.956478 |
| 43 | 1 | 0 | 1.157161  | 3.447979  | -1.328255 |
| 44 | 6 | 0 | 4.602385  | 3.275337  | -1.070852 |
| 45 | 1 | 0 | 4.867196  | 3.802689  | -1.993933 |
| 46 | 1 | 0 | 4.657749  | 3.986810  | -0.241967 |
| 47 | 1 | 0 | 5.333225  | 2.485392  | -0.890288 |
| 48 | 6 | 0 | 4.204964  | 0.796668  | -2.548670 |
| 49 | 1 | 0 | 3.926823  | -0.011195 | -3.231317 |
| 50 | 1 | 0 | 5.041796  | 1.350411  | -2.985957 |
| 51 | 1 | 0 | 4.518390  | 0.342977  | -1.604237 |
| 52 | 6 | 0 | -0.417002 | -1.741846 | 0.616043  |
| 53 | 6 | 0 | -1.739156 | -1.865051 | 0.209304  |
| 54 | 6 | 0 | -0.951511 | -1.863373 | -2.049904 |
| 55 | 6 | 0 | 0.340058  | -1.729310 | -1.552367 |
| 56 | 1 | 0 | -0.135808 | -1.659801 | 1.664536  |
| 57 | 1 | 0 | -2.538680 | -1.867902 | 0.943581  |
| 58 | 1 | 0 | -1.116639 | -1.927011 | -3.120340 |
| 59 | 7 | 0 | 0.598992  | -1.668528 | -0.245531 |
| 60 | 1 | 0 | 1.201707  | -1.625502 | -2.205701 |
| 61 | 6 | 0 | -2.053590 | 1.686059  | 1.185550  |
| 62 | 6 | 0 | -2.027945 | -1.919966 | -1.158979 |
| 63 | 6 | 0 | -3.426150 | -1.998358 | -1.644515 |
| 64 | 6 | 0 | -3.820108 | -1.291108 | -2.786104 |
| 65 | 6 | 0 | -4.376977 | -2.768676 | -0.966456 |
| 66 | 6 | 0 | -5.133602 | -1.352861 | -3.238803 |

|    |   |   |           |           |           |
|----|---|---|-----------|-----------|-----------|
| 67 | 1 | 0 | -3.094606 | -0.673235 | -3.307858 |
| 68 | 6 | 0 | -5.689161 | -2.833355 | -1.421640 |
| 69 | 1 | 0 | -4.076590 | -3.339420 | -0.092783 |
| 70 | 6 | 0 | -6.071409 | -2.125117 | -2.558267 |
| 71 | 1 | 0 | -5.426141 | -0.793451 | -4.121447 |
| 72 | 1 | 0 | -6.413406 | -3.443258 | -0.891612 |
| 73 | 6 | 0 | -3.417828 | 1.847331  | 1.739084  |
| 74 | 6 | 0 | -3.755014 | 1.272778  | 2.969610  |
| 75 | 6 | 0 | -4.390485 | 2.569755  | 1.039449  |
| 76 | 6 | 0 | -5.036931 | 1.417088  | 3.488327  |
| 77 | 1 | 0 | -3.014287 | 0.689342  | 3.508744  |
| 78 | 6 | 0 | -5.670401 | 2.717825  | 1.561440  |
| 79 | 1 | 0 | -4.132190 | 3.039603  | 0.095170  |
| 80 | 6 | 0 | -5.997154 | 2.141224  | 2.786295  |
| 81 | 1 | 0 | -5.287860 | 0.958946  | 4.439342  |
| 82 | 1 | 0 | -6.412288 | 3.289574  | 1.013793  |
| 83 | 1 | 0 | -6.996724 | 2.255966  | 3.192284  |
| 84 | 1 | 0 | -7.095733 | -2.175404 | -2.912461 |

## IntC2

|                                              |              |
|----------------------------------------------|--------------|
| Thermal correction to Energy=                | 0.753034     |
| Thermal correction to Enthalpy=              | 0.753978     |
| Thermal correction to Gibbs Free Energy=     | 0.642694     |
| Sum of electronic and zero-point Energies=   | -1779.833112 |
| Sum of electronic and thermal Energies=      | -1779.794176 |
| Sum of electronic and thermal Enthalpies=    | -1779.793232 |
| Sum of electronic and thermal Free Energies= | -1779.904516 |

Esol = -1781.1487271

| Center<br>Number | Atomic<br>Number | Atomic<br>Type | Coordinates (Angstroms) |          |           |
|------------------|------------------|----------------|-------------------------|----------|-----------|
|                  |                  |                | X                       | Y        | Z         |
| 1                | 6                | 0              | -0.859761               | 2.128873 | -3.158161 |
| 2                | 6                | 0              | -1.527597               | 3.435717 | -1.267187 |
| 3                | 6                | 0              | -0.850197               | 1.012823 | -2.341031 |
| 4                | 1                | 0              | -0.626531               | 2.022473 | -4.211484 |
| 5                | 6                | 0              | -1.506927               | 2.275823 | -0.509397 |
| 6                | 1                | 0              | -1.776803               | 4.379856 | -0.795495 |
| 7                | 1                | 0              | -0.589258               | 0.018103 | -2.684460 |
| 8                | 1                | 0              | -1.754523               | 2.241694 | 0.547624  |
| 9                | 7                | 0              | -1.169280               | 1.094851 | -1.041813 |

|    |   |   |           |           |           |
|----|---|---|-----------|-----------|-----------|
| 10 | 6 | 0 | 2.459845  | -1.189366 | -1.315901 |
| 11 | 6 | 0 | 2.664223  | -1.696640 | 0.146584  |
| 12 | 5 | 0 | 0.869223  | -0.240706 | 0.073368  |
| 13 | 8 | 0 | 1.664314  | -0.020868 | -1.131930 |
| 14 | 8 | 0 | 1.407885  | -1.401284 | 0.747053  |
| 15 | 6 | 0 | 2.921029  | -3.192560 | 0.268360  |
| 16 | 1 | 0 | 3.809206  | -3.489000 | -0.300469 |
| 17 | 1 | 0 | 3.084059  | -3.453221 | 1.318081  |
| 18 | 1 | 0 | 2.060525  | -3.758391 | -0.092662 |
| 19 | 6 | 0 | 1.646499  | -2.182109 | -2.151874 |
| 20 | 1 | 0 | 1.387180  | -1.702886 | -3.101525 |
| 21 | 1 | 0 | 2.210007  | -3.093806 | -2.374119 |
| 22 | 1 | 0 | 0.718366  | -2.439779 | -1.631502 |
| 23 | 6 | 0 | 3.744402  | -0.812202 | -2.041350 |
| 24 | 1 | 0 | 4.417141  | -1.673053 | -2.120052 |
| 25 | 1 | 0 | 3.507597  | -0.472198 | -3.053704 |
| 26 | 1 | 0 | 4.266073  | -0.004030 | -1.524508 |
| 27 | 6 | 0 | 3.765635  | -0.916517 | 0.873665  |
| 28 | 1 | 0 | 3.686669  | -1.120653 | 1.945297  |
| 29 | 1 | 0 | 4.764598  | -1.210190 | 0.535613  |
| 30 | 1 | 0 | 3.650101  | 0.160141  | 0.717943  |
| 31 | 6 | 0 | -2.671172 | -1.690148 | -0.145910 |
| 32 | 6 | 0 | -2.465540 | -1.183175 | 1.316495  |
| 33 | 5 | 0 | -0.872610 | -0.238602 | -0.072928 |
| 34 | 8 | 0 | -1.414107 | -1.397986 | -0.746416 |
| 35 | 8 | 0 | -1.667167 | -0.016645 | 1.132347  |
| 36 | 6 | 0 | -3.749175 | -0.802792 | 2.041898  |
| 37 | 1 | 0 | -4.424023 | -1.661985 | 2.120656  |
| 38 | 1 | 0 | -3.511553 | -0.463289 | 3.054229  |
| 39 | 1 | 0 | -4.268854 | 0.006615  | 1.524983  |
| 40 | 6 | 0 | -3.770664 | -0.907413 | -0.873093 |
| 41 | 1 | 0 | -3.692159 | -1.111835 | -1.944705 |
| 42 | 1 | 0 | -4.770345 | -1.198640 | -0.535047 |
| 43 | 1 | 0 | -3.652542 | 0.168978  | -0.717458 |
| 44 | 6 | 0 | -2.931687 | -3.185445 | -0.267456 |
| 45 | 1 | 0 | -3.820579 | -3.479587 | 0.301450  |
| 46 | 1 | 0 | -3.095398 | -3.445866 | -1.317129 |
| 47 | 1 | 0 | -2.072579 | -3.753354 | 0.093634  |
| 48 | 6 | 0 | -1.654616 | -2.177787 | 2.152598  |
| 49 | 1 | 0 | -1.394089 | -1.699053 | 3.102166  |
| 50 | 1 | 0 | -2.220365 | -3.088054 | 2.375005  |
| 51 | 1 | 0 | -0.727136 | -2.437828 | 1.632240  |
| 52 | 6 | 0 | 1.509762  | 2.272247  | 0.509451  |
| 53 | 6 | 0 | 1.532990  | 3.432269  | 1.266974  |

|    |   |   |           |          |           |
|----|---|---|-----------|----------|-----------|
| 54 | 6 | 0 | 0.861519  | 2.127462 | 3.158069  |
| 55 | 6 | 0 | 0.849510  | 1.011248 | 2.341199  |
| 56 | 1 | 0 | 1.757562  | 2.237269 | -0.547496 |
| 57 | 1 | 0 | 1.784568  | 4.375700 | 0.795123  |
| 58 | 1 | 0 | 0.627739  | 2.021866 | 4.211350  |
| 59 | 7 | 0 | 1.169095  | 1.092218 | 1.042035  |
| 60 | 1 | 0 | 0.586050  | 0.017243 | 2.684776  |
| 61 | 6 | 0 | -1.196298 | 3.379807 | -2.625270 |
| 62 | 6 | 0 | 1.201132  | 3.377477 | 2.624966  |
| 63 | 6 | 0 | 1.203601  | 4.595071 | 3.468484  |
| 64 | 6 | 0 | 0.236662  | 4.768380 | 4.465174  |
| 65 | 6 | 0 | 2.170128  | 5.589868 | 3.283350  |
| 66 | 6 | 0 | 0.235577  | 5.911077 | 5.257143  |
| 67 | 1 | 0 | -0.533428 | 4.014775 | 4.600593  |
| 68 | 6 | 0 | 2.170781  | 6.730205 | 4.078803  |
| 69 | 1 | 0 | 2.941449  | 5.453570 | 2.531138  |
| 70 | 6 | 0 | 1.203107  | 6.894358 | 5.066913  |
| 71 | 1 | 0 | -0.525623 | 6.036370 | 6.020153  |
| 72 | 1 | 0 | 2.932979  | 7.488378 | 3.931990  |
| 73 | 6 | 0 | -1.196345 | 4.597177 | -3.469113 |
| 74 | 6 | 0 | -0.229416 | 4.768109 | -4.466223 |
| 75 | 6 | 0 | -2.160649 | 5.594112 | -3.283897 |
| 76 | 6 | 0 | -0.226184 | 5.910572 | -5.258529 |
| 77 | 1 | 0 | 0.538986  | 4.012797 | -4.601726 |
| 78 | 6 | 0 | -2.159163 | 6.734213 | -4.079685 |
| 79 | 1 | 0 | -2.931977 | 5.459689 | -2.531354 |
| 80 | 6 | 0 | -1.191525 | 6.895988 | -5.068221 |
| 81 | 1 | 0 | 0.534988  | 6.034004 | -6.021870 |
| 82 | 1 | 0 | -2.919670 | 7.494068 | -3.932801 |
| 83 | 1 | 0 | -1.190452 | 7.786317 | -5.688320 |
| 84 | 1 | 0 | 1.203709  | 7.784877 | 5.686742  |

---

### TSC3

|                                              |              |
|----------------------------------------------|--------------|
| Thermal correction to Energy=                | 0.751175     |
| Thermal correction to Enthalpy=              | 0.752119     |
| Thermal correction to Gibbs Free Energy=     | 0.642687     |
| Sum of electronic and zero-point Energies=   | -1779.818835 |
| Sum of electronic and thermal Energies=      | -1779.780303 |
| Sum of electronic and thermal Enthalpies=    | -1779.779359 |
| Sum of electronic and thermal Free Energies= | -1779.888791 |

Esol = -1781.131222

| Center<br>Number | Atomic<br>Number | Atomic<br>Type | Coordinates (Angstroms) |           |           |
|------------------|------------------|----------------|-------------------------|-----------|-----------|
|                  |                  |                | X                       | Y         | Z         |
| 1                | 6                | 0              | -0.561679               | 3.154615  | -0.616302 |
| 2                | 6                | 0              | -1.997237               | 1.308077  | -1.092493 |
| 3                | 6                | 0              | 0.521458                | 2.344517  | -0.783769 |
| 4                | 1                | 0              | -0.393409               | 4.207469  | -0.418167 |
| 5                | 6                | 0              | -0.877192               | 0.499940  | -1.221040 |
| 6                | 1                | 0              | -2.971631               | 0.844914  | -1.210897 |
| 7                | 1                | 0              | 1.544599                | 2.691303  | -0.720337 |
| 8                | 1                | 0              | -0.928106               | -0.539763 | -1.522482 |
| 9                | 7                | 0              | 0.386381                | 1.006568  | -1.082824 |
| 10               | 6                | 0              | 2.695522                | 1.443787  | 2.337782  |
| 11               | 6                | 0              | 3.366345                | 0.034916  | 2.473687  |
| 12               | 5                | 0              | 1.572500                | -0.110155 | 1.092917  |
| 13               | 8                | 0              | 1.425426                | 1.130448  | 1.741494  |
| 14               | 8                | 0              | 2.838602                | -0.678599 | 1.344363  |
| 15               | 6                | 0              | 4.883060                | 0.042135  | 2.375911  |
| 16               | 1                | 0              | 5.322061                | 0.664311  | 3.162866  |
| 17               | 1                | 0              | 5.262356                | -0.976576 | 2.493545  |
| 18               | 1                | 0              | 5.203939                | 0.419348  | 1.403252  |
| 19               | 6                | 0              | 3.458823                | 2.367225  | 1.390415  |
| 20               | 1                | 0              | 2.849941                | 3.258972  | 1.212306  |
| 21               | 1                | 0              | 4.409149                | 2.688040  | 1.827872  |
| 22               | 1                | 0              | 3.646785                | 1.871390  | 0.433927  |
| 23               | 6                | 0              | 2.441811                | 2.148931  | 3.662995  |
| 24               | 1                | 0              | 3.383367                | 2.324482  | 4.194124  |
| 25               | 1                | 0              | 1.971037                | 3.117379  | 3.474625  |
| 26               | 1                | 0              | 1.777693                | 1.565631  | 4.302652  |
| 27               | 6                | 0              | 2.910897                | -0.707319 | 3.731155  |
| 28               | 1                | 0              | 3.243847                | -1.746027 | 3.662296  |
| 29               | 1                | 0              | 3.328879                | -0.265991 | 4.640589  |
| 30               | 1                | 0              | 1.819039                | -0.701844 | 3.809019  |
| 31               | 6                | 0              | 3.365803                | -0.034588 | -2.474061 |
| 32               | 6                | 0              | 2.695134                | -1.443529 | -2.338016 |
| 33               | 5                | 0              | 1.572230                | 0.110312  | -1.092900 |
| 34               | 8                | 0              | 2.838185                | 0.678924  | -1.344678 |
| 35               | 8                | 0              | 1.425162                | -1.130331 | -1.741398 |
| 36               | 6                | 0              | 2.441137                | -2.148652 | -3.663190 |
| 37               | 1                | 0              | 3.382570                | -2.324124 | -4.194564 |
| 38               | 1                | 0              | 1.970478                | -3.117137 | -3.474725 |
| 39               | 1                | 0              | 1.776815                | -1.565383 | -4.302662 |
| 40               | 6                | 0              | 2.910089                | 0.707583  | -3.731470 |

|    |   |   |           |           |           |
|----|---|---|-----------|-----------|-----------|
| 41 | 1 | 0 | 3.243036  | 1.746300  | -3.662726 |
| 42 | 1 | 0 | 3.327885  | 0.266223  | -4.640974 |
| 43 | 1 | 0 | 1.818214  | 0.702090  | -3.809101 |
| 44 | 6 | 0 | 4.882536  | -0.041668 | -2.376524 |
| 45 | 1 | 0 | 5.321472  | -0.663835 | -3.163524 |
| 46 | 1 | 0 | 5.261722  | 0.977073  | -2.494255 |
| 47 | 1 | 0 | 5.203593  | -0.418817 | -1.403899 |
| 48 | 6 | 0 | 3.458754  | -2.366955 | -1.390899 |
| 49 | 1 | 0 | 2.850077  | -3.258852 | -1.212832 |
| 50 | 1 | 0 | 4.409073  | -2.687529 | -1.828545 |
| 51 | 1 | 0 | 3.646770  | -1.871234 | -0.434364 |
| 52 | 6 | 0 | -0.876841 | -0.500131 | 1.221708  |
| 53 | 6 | 0 | -1.996818 | -1.308388 | 1.093280  |
| 54 | 6 | 0 | -0.561128 | -3.154660 | 0.616431  |
| 55 | 6 | 0 | 0.521944  | -2.344465 | 0.783829  |
| 56 | 1 | 0 | -0.927811 | 0.539518  | 1.523322  |
| 57 | 1 | 0 | -2.971249 | -0.845376 | 1.211975  |
| 58 | 1 | 0 | -0.392783 | -4.207457 | 0.418059  |
| 59 | 7 | 0 | 0.386767  | -1.006572 | 1.083097  |
| 60 | 1 | 0 | 1.545113  | -2.691115 | 0.720119  |
| 61 | 6 | 0 | -1.883059 | 2.655727  | -0.765982 |
| 62 | 6 | 0 | -1.882538 | -2.655949 | 0.766446  |
| 63 | 6 | 0 | -3.061997 | 3.521806  | -0.585126 |
| 64 | 6 | 0 | -4.242150 | 3.294395  | -1.307743 |
| 65 | 6 | 0 | -3.034555 | 4.593736  | 0.317977  |
| 66 | 6 | 0 | -5.355882 | 4.104718  | -1.127680 |
| 67 | 1 | 0 | -4.274731 | 2.491244  | -2.038041 |
| 68 | 6 | 0 | -4.147936 | 5.406888  | 0.494092  |
| 69 | 1 | 0 | -2.140712 | 4.771585  | 0.908554  |
| 70 | 6 | 0 | -5.315108 | 5.165897  | -0.225935 |
| 71 | 1 | 0 | -6.256838 | 3.913319  | -1.702148 |
| 72 | 1 | 0 | -4.106459 | 6.226680  | 1.204436  |
| 73 | 1 | 0 | -6.184558 | 5.800118  | -0.087224 |
| 74 | 6 | 0 | -3.061399 | -3.522108 | 0.585460  |
| 75 | 6 | 0 | -3.033963 | -4.593583 | -0.318181 |
| 76 | 6 | 0 | -4.241453 | -3.295206 | 1.308393  |
| 77 | 6 | 0 | -4.147271 | -5.406782 | -0.494533 |
| 78 | 1 | 0 | -2.140195 | -4.771001 | -0.909001 |
| 79 | 6 | 0 | -5.355110 | -4.105589 | 1.128106  |
| 80 | 1 | 0 | -4.274011 | -2.492422 | 2.039099  |
| 81 | 6 | 0 | -5.314352 | -5.166299 | 0.225810  |
| 82 | 1 | 0 | -4.105813 | -6.226191 | -1.205320 |
| 83 | 1 | 0 | -6.255998 | -3.914606 | 1.702821  |
| 84 | 1 | 0 | -6.183751 | -5.800548 | 0.086903  |



---

**IntC3**

|                                              |              |
|----------------------------------------------|--------------|
| Thermal correction to Energy=                | 0.756081     |
| Thermal correction to Enthalpy=              | 0.757025     |
| Thermal correction to Gibbs Free Energy=     | 0.647667     |
| Sum of electronic and zero-point Energies=   | -1779.879422 |
| Sum of electronic and thermal Energies=      | -1779.841057 |
| Sum of electronic and thermal Enthalpies=    | -1779.840113 |
| Sum of electronic and thermal Free Energies= | -1779.949471 |

Esol =-1781.2016801

---

| Center<br>Number | Atomic<br>Number | Atomic<br>Type | Coordinates (Angstroms) |           |           |
|------------------|------------------|----------------|-------------------------|-----------|-----------|
|                  |                  |                | X                       | Y         | Z         |
| 1                | 6                | 0              | -1.228466               | 2.915554  | -0.111183 |
| 2                | 6                | 0              | -2.261674               | 0.841584  | -0.810796 |
| 3                | 6                | 0              | -0.006214               | 2.382988  | -0.291508 |
| 4                | 1                | 0              | -1.325845               | 3.949541  | 0.194166  |
| 5                | 6                | 0              | -0.954994               | 0.154608  | -0.526199 |
| 6                | 1                | 0              | -3.098499               | 0.241001  | -1.152362 |
| 7                | 1                | 0              | 0.909361                | 2.952206  | -0.170999 |
| 8                | 1                | 0              | -0.805853               | -0.707817 | -1.183971 |
| 9                | 7                | 0              | 0.164300                | 1.075002  | -0.730871 |
| 10               | 6                | 0              | 2.435193                | 1.438450  | 2.997349  |
| 11               | 6                | 0              | 3.282707                | 0.121212  | 3.064087  |
| 12               | 5                | 0              | 1.370200                | -0.241733 | 1.922102  |
| 13               | 8                | 0              | 1.148950                | 0.958019  | 2.553543  |
| 14               | 8                | 0              | 2.668887                | -0.694702 | 2.044526  |
| 15               | 6                | 0              | 4.754519                | 0.294476  | 2.730753  |
| 16               | 1                | 0              | 5.233876                | 0.968412  | 3.447941  |
| 17               | 1                | 0              | 5.256880                | -0.674983 | 2.781107  |
| 18               | 1                | 0              | 4.885224                | 0.701038  | 1.726271  |
| 19               | 6                | 0              | 2.946042                | 2.417828  | 1.945174  |
| 20               | 1                | 0              | 2.209045                | 3.217482  | 1.833951  |
| 21               | 1                | 0              | 3.897348                | 2.865223  | 2.248022  |
| 22               | 1                | 0              | 3.072487                | 1.930777  | 0.972933  |
| 23               | 6                | 0              | 2.254601                | 2.142218  | 4.333102  |
| 24               | 1                | 0              | 3.223890                | 2.445279  | 4.742026  |
| 25               | 1                | 0              | 1.647681                | 3.039649  | 4.190298  |
| 26               | 1                | 0              | 1.749937                | 1.500262  | 5.056463  |
| 27               | 6                | 0              | 3.116623                | -0.623140 | 4.387294  |
| 28               | 1                | 0              | 3.562098                | -1.615974 | 4.289684  |

|    |   |   |           |           |           |
|----|---|---|-----------|-----------|-----------|
| 29 | 1 | 0 | 3.609313  | -0.096779 | 5.209242  |
| 30 | 1 | 0 | 2.057759  | -0.745805 | 4.633425  |
| 31 | 6 | 0 | 3.439183  | 0.784658  | -2.233425 |
| 32 | 6 | 0 | 2.943259  | -0.702168 | -2.259635 |
| 33 | 5 | 0 | 1.391028  | 0.631196  | -1.297691 |
| 34 | 8 | 0 | 2.540376  | 1.395385  | -1.285128 |
| 35 | 8 | 0 | 1.539769  | -0.567606 | -1.952493 |
| 36 | 6 | 0 | 3.082711  | -1.389131 | -3.608761 |
| 37 | 1 | 0 | 4.134073  | -1.428772 | -3.911711 |
| 38 | 1 | 0 | 2.708386  | -2.412986 | -3.535101 |
| 39 | 1 | 0 | 2.511782  | -0.871353 | -4.380781 |
| 40 | 6 | 0 | 3.232567  | 1.502128  | -3.565734 |
| 41 | 1 | 0 | 3.405840  | 2.570810  | -3.419322 |
| 42 | 1 | 0 | 3.923375  | 1.136215  | -4.330079 |
| 43 | 1 | 0 | 2.208148  | 1.367527  | -3.925167 |
| 44 | 6 | 0 | 4.865421  | 0.970631  | -1.744286 |
| 45 | 1 | 0 | 5.568740  | 0.457394  | -2.407881 |
| 46 | 1 | 0 | 5.114022  | 2.035024  | -1.737316 |
| 47 | 1 | 0 | 4.989271  | 0.579689  | -0.732567 |
| 48 | 6 | 0 | 3.570407  | -1.554206 | -1.160417 |
| 49 | 1 | 0 | 3.051234  | -2.515901 | -1.131973 |
| 50 | 1 | 0 | 4.630306  | -1.740343 | -1.356951 |
| 51 | 1 | 0 | 3.466981  | -1.078961 | -0.179405 |
| 52 | 6 | 0 | -0.944062 | -0.376913 | 0.944935  |
| 53 | 6 | 0 | -2.047488 | -1.381008 | 1.134335  |
| 54 | 6 | 0 | -0.461354 | -3.111114 | 0.544510  |
| 55 | 6 | 0 | 0.563657  | -2.283657 | 0.817504  |
| 56 | 1 | 0 | -1.075525 | 0.489064  | 1.601747  |
| 57 | 1 | 0 | -3.034917 | -1.019874 | 1.403287  |
| 58 | 1 | 0 | -0.264199 | -4.133196 | 0.246818  |
| 59 | 7 | 0 | 0.355700  | -0.978413 | 1.249516  |
| 60 | 1 | 0 | 1.601101  | -2.598261 | 0.780436  |
| 61 | 6 | 0 | -2.405090 | 2.151434  | -0.533457 |
| 62 | 6 | 0 | -1.825316 | -2.680598 | 0.861975  |
| 63 | 6 | 0 | -3.700599 | 2.851416  | -0.721447 |
| 64 | 6 | 0 | -4.541223 | 2.518098  | -1.789811 |
| 65 | 6 | 0 | -4.114959 | 3.849750  | 0.166769  |
| 66 | 6 | 0 | -5.767467 | 3.151027  | -1.956051 |
| 67 | 1 | 0 | -4.212757 | 1.770716  | -2.505636 |
| 68 | 6 | 0 | -5.342347 | 4.484286  | 0.000810  |
| 69 | 1 | 0 | -3.481468 | 4.113816  | 1.008744  |
| 70 | 6 | 0 | -6.173793 | 4.136838  | -1.060394 |
| 71 | 1 | 0 | -6.402226 | 2.881647  | -2.794424 |
| 72 | 1 | 0 | -5.652175 | 5.249775  | 0.705550  |

|    |   |   |           |           |           |
|----|---|---|-----------|-----------|-----------|
| 73 | 6 | 0 | -2.904820 | -3.694864 | 0.956922  |
| 74 | 6 | 0 | -2.985382 | -4.748318 | 0.039639  |
| 75 | 6 | 0 | -3.871683 | -3.611821 | 1.965211  |
| 76 | 6 | 0 | -4.014395 | -5.681683 | 0.118390  |
| 77 | 1 | 0 | -2.248793 | -4.822523 | -0.755470 |
| 78 | 6 | 0 | -4.899425 | -4.544139 | 2.044992  |
| 79 | 1 | 0 | -3.796928 | -2.819115 | 2.703329  |
| 80 | 6 | 0 | -4.975406 | -5.583144 | 1.120915  |
| 81 | 1 | 0 | -4.067500 | -6.486835 | -0.607880 |
| 82 | 1 | 0 | -5.636960 | -4.465420 | 2.837600  |
| 83 | 1 | 0 | -5.774866 | -6.314280 | 1.185161  |
| 84 | 1 | 0 | -7.129618 | 4.633847  | -1.191471 |

### TSC3

|                                              |              |
|----------------------------------------------|--------------|
| Thermal correction to Energy=                | 0.752108     |
| Thermal correction to Enthalpy=              | 0.753053     |
| Thermal correction to Gibbs Free Energy=     | 0.642661     |
| Sum of electronic and zero-point Energies=   | -1779.833269 |
| Sum of electronic and thermal Energies=      | -1779.794689 |
| Sum of electronic and thermal Enthalpies=    | -1779.793745 |
| Sum of electronic and thermal Free Energies= | -1779.904137 |

Esol = -1781.1538146

| Center<br>Number | Atomic<br>Number | Atomic<br>Type | Coordinates (Angstroms) |           |           |
|------------------|------------------|----------------|-------------------------|-----------|-----------|
|                  |                  |                | X                       | Y         | Z         |
| 1                | 6                | 0              | 0.078974                | -3.110485 | -0.593533 |
| 2                | 6                | 0              | 1.520165                | -1.250398 | -1.058492 |
| 3                | 6                | 0              | -1.000141               | -2.326733 | -0.797705 |
| 4                | 1                | 0              | -0.085868               | -4.159553 | -0.375669 |
| 5                | 6                | 0              | 0.405944                | -0.420154 | -1.131203 |
| 6                | 1                | 0              | 2.492587                | -0.774594 | -1.143651 |
| 7                | 1                | 0              | -2.015058               | -2.699824 | -0.767888 |
| 8                | 1                | 0              | 0.463220                | 0.606840  | -1.469677 |
| 9                | 7                | 0              | -0.883379               | -0.972905 | -1.133643 |
| 10               | 6                | 0              | -3.250781               | -1.450445 | 2.479699  |
| 11               | 6                | 0              | -4.038937               | -0.093077 | 2.503681  |
| 12               | 5                | 0              | -2.019105               | 0.208582  | 1.558551  |
| 13               | 8                | 0              | -1.911716               | -1.031407 | 2.134122  |
| 14               | 8                | 0              | -3.302108               | 0.715420  | 1.558791  |
| 15               | 6                | 0              | -5.482926               | -0.189995 | 2.043640  |

|    |   |   |           |           |           |
|----|---|---|-----------|-----------|-----------|
| 16 | 1 | 0 | -6.055056 | -0.843307 | 2.709918  |
| 17 | 1 | 0 | -5.939146 | 0.803577  | 2.064457  |
| 18 | 1 | 0 | -5.546437 | -0.581032 | 1.027041  |
| 19 | 6 | 0 | -3.740301 | -2.397940 | 1.390221  |
| 20 | 1 | 0 | -3.023873 | -3.218847 | 1.302640  |
| 21 | 1 | 0 | -4.718522 | -2.816788 | 1.644455  |
| 22 | 1 | 0 | -3.812047 | -1.886577 | 0.425592  |
| 23 | 6 | 0 | -3.195613 | -2.170726 | 3.818043  |
| 24 | 1 | 0 | -4.204631 | -2.423911 | 4.158996  |
| 25 | 1 | 0 | -2.629026 | -3.098437 | 3.706901  |
| 26 | 1 | 0 | -2.706873 | -1.561403 | 4.579563  |
| 27 | 6 | 0 | -3.950857 | 0.619907  | 3.851478  |
| 28 | 1 | 0 | -4.350491 | 1.630710  | 3.740936  |
| 29 | 1 | 0 | -4.525315 | 0.098048  | 4.621460  |
| 30 | 1 | 0 | -2.911125 | 0.697409  | 4.183316  |
| 31 | 6 | 0 | -4.038878 | 0.093056  | -2.503774 |
| 32 | 6 | 0 | -3.250729 | 1.450427  | -2.479778 |
| 33 | 5 | 0 | -2.019066 | -0.208592 | -1.558600 |
| 34 | 8 | 0 | -3.302068 | -0.715432 | -1.558862 |
| 35 | 8 | 0 | -1.911669 | 1.031394  | -2.134178 |
| 36 | 6 | 0 | -3.195541 | 2.170709  | -3.818121 |
| 37 | 1 | 0 | -4.204554 | 2.423890  | -4.159091 |
| 38 | 1 | 0 | -2.628960 | 3.098423  | -3.706968 |
| 39 | 1 | 0 | -2.706785 | 1.561389  | -4.579632 |
| 40 | 6 | 0 | -3.950761 | -0.619934 | -3.851566 |
| 41 | 1 | 0 | -4.350389 | -1.630740 | -3.741029 |
| 42 | 1 | 0 | -4.525205 | -0.098083 | -4.621563 |
| 43 | 1 | 0 | -2.911020 | -0.697428 | -4.183379 |
| 44 | 6 | 0 | -5.482879 | 0.189970  | -2.043770 |
| 45 | 1 | 0 | -6.054994 | 0.843279  | -2.710063 |
| 46 | 1 | 0 | -5.939095 | -0.803604 | -2.064597 |
| 47 | 1 | 0 | -5.546418 | 0.581008  | -1.027173 |
| 48 | 6 | 0 | -3.740272 | 2.397917  | -1.390306 |
| 49 | 1 | 0 | -3.023844 | 3.218822  | -1.302704 |
| 50 | 1 | 0 | -4.718487 | 2.816767  | -1.644558 |
| 51 | 1 | 0 | -3.812038 | 1.886545  | -0.425683 |
| 52 | 6 | 0 | 0.405913  | 0.420156  | 1.131206  |
| 53 | 6 | 0 | 1.520132  | 1.250406  | 1.058523  |
| 54 | 6 | 0 | 0.078942  | 3.110490  | 0.593547  |
| 55 | 6 | 0 | -1.000174 | 2.326732  | 0.797691  |
| 56 | 1 | 0 | 0.463187  | -0.606839 | 1.469674  |
| 57 | 1 | 0 | 2.492554  | 0.774607  | 1.143699  |
| 58 | 1 | 0 | -0.085900 | 4.159559  | 0.375688  |
| 59 | 7 | 0 | -0.883412 | 0.972901  | 1.133621  |

|    |   |   |           |           |           |
|----|---|---|-----------|-----------|-----------|
| 60 | 1 | 0 | -2.015092 | 2.699818  | 0.767856  |
| 61 | 6 | 0 | 1.420764  | -2.601205 | -0.755540 |
| 62 | 6 | 0 | 1.420731  | 2.601215  | 0.755578  |
| 63 | 6 | 0 | 2.597250  | -3.463093 | -0.602602 |
| 64 | 6 | 0 | 3.799043  | -3.174076 | -1.272326 |
| 65 | 6 | 0 | 2.565966  | -4.604949 | 0.215886  |
| 66 | 6 | 0 | 4.918737  | -3.979677 | -1.119292 |
| 67 | 1 | 0 | 3.841354  | -2.322923 | -1.945083 |
| 68 | 6 | 0 | 3.685841  | -5.414388 | 0.362034  |
| 69 | 1 | 0 | 1.662476  | -4.842090 | 0.769372  |
| 70 | 6 | 0 | 4.870951  | -5.107774 | -0.301992 |
| 71 | 1 | 0 | 5.831190  | -3.734351 | -1.654198 |
| 72 | 1 | 0 | 3.635710  | -6.286253 | 1.007338  |
| 73 | 6 | 0 | 2.597216  | 3.463109  | 0.602670  |
| 74 | 6 | 0 | 2.565943  | 4.604973  | -0.215808 |
| 75 | 6 | 0 | 3.798997  | 3.174093  | 1.272416  |
| 76 | 6 | 0 | 3.685817  | 5.414418  | -0.361927 |
| 77 | 1 | 0 | 1.662463  | 4.842114  | -0.769310 |
| 78 | 6 | 0 | 4.918691  | 3.979701  | 1.119411  |
| 79 | 1 | 0 | 3.841299  | 2.322935  | 1.945167  |
| 80 | 6 | 0 | 4.870915  | 5.107805  | 0.302120  |
| 81 | 1 | 0 | 3.635695  | 6.286289  | -1.007225 |
| 82 | 1 | 0 | 5.831134  | 3.734375  | 1.654334  |
| 83 | 1 | 0 | 5.744618  | -5.741002 | -0.188122 |
| 84 | 1 | 0 | 5.744581  | 5.741038  | 0.188273  |

#### IntC4

|                                              |             |
|----------------------------------------------|-------------|
| Thermal correction to Energy=                | 0.374767    |
| Thermal correction to Enthalpy=              | 0.375711    |
| Thermal correction to Gibbs Free Energy=     | 0.307495    |
| Sum of electronic and zero-point Energies=   | -889.914251 |
| Sum of electronic and thermal Energies=      | -889.895162 |
| Sum of electronic and thermal Enthalpies=    | -889.894218 |
| Sum of electronic and thermal Free Energies= | -889.962434 |

Esol = -890.5771992

| Center<br>Number | Atomic<br>Number | Atomic<br>Type | Coordinates (Angstroms) |          |           |
|------------------|------------------|----------------|-------------------------|----------|-----------|
|                  |                  |                | X                       | Y        | Z         |
| 1                | 6                | 0              | 2.306263                | 1.193652 | -0.070621 |
| 2                | 6                | 0              | 3.662088                | 1.202364 | -0.077911 |

|    |   |   |           |           |           |
|----|---|---|-----------|-----------|-----------|
| 3  | 6 | 0 | 3.662143  | -1.202166 | 0.077670  |
| 4  | 6 | 0 | 2.306318  | -1.193519 | 0.070364  |
| 5  | 7 | 0 | 1.579449  | 0.000051  | -0.000109 |
| 6  | 1 | 0 | 1.704415  | 2.092669  | -0.105013 |
| 7  | 1 | 0 | 4.157772  | 2.166342  | -0.104575 |
| 8  | 1 | 0 | 4.157875  | -2.166120 | 0.104268  |
| 9  | 1 | 0 | 1.704511  | -2.092566 | 0.104695  |
| 10 | 5 | 0 | 0.146532  | 0.000019  | -0.000060 |
| 11 | 8 | 0 | -0.598795 | -1.142485 | 0.150412  |
| 12 | 8 | 0 | -0.598854 | 1.142489  | -0.150492 |
| 13 | 6 | 0 | -1.960574 | -0.766714 | -0.156950 |
| 14 | 6 | 0 | -1.960601 | 0.766657  | 0.156938  |
| 15 | 6 | 0 | -2.905307 | -1.590147 | 0.701492  |
| 16 | 1 | 0 | -3.937049 | -1.250476 | 0.565673  |
| 17 | 1 | 0 | -2.848815 | -2.640411 | 0.405300  |
| 18 | 1 | 0 | -2.645187 | -1.517734 | 1.758422  |
| 19 | 6 | 0 | -2.181536 | -1.064234 | -1.638342 |
| 20 | 1 | 0 | -1.951459 | -2.115929 | -1.823269 |
| 21 | 1 | 0 | -3.217061 | -0.875986 | -1.934625 |
| 22 | 1 | 0 | -1.522213 | -0.453112 | -2.261704 |
| 23 | 6 | 0 | -2.905413 | 1.590046  | -0.701458 |
| 24 | 1 | 0 | -3.937134 | 1.250331  | -0.565588 |
| 25 | 1 | 0 | -2.848953 | 2.640314  | -0.405272 |
| 26 | 1 | 0 | -2.645343 | 1.517642  | -1.758401 |
| 27 | 6 | 0 | -2.181505 | 1.064167  | 1.638341  |
| 28 | 1 | 0 | -1.951460 | 2.115871  | 1.823258  |
| 29 | 1 | 0 | -3.217008 | 0.875876  | 1.934672  |
| 30 | 1 | 0 | -1.522127 | 0.453071  | 2.261671  |
| 31 | 6 | 0 | 4.429598  | 0.000120  | -0.000087 |
| 32 | 6 | 0 | 5.885834  | 0.000160  | -0.000045 |
| 33 | 6 | 0 | 6.620080  | 1.074447  | -0.540881 |
| 34 | 6 | 0 | 6.620113  | -1.074087 | 0.540833  |
| 35 | 6 | 0 | 8.007723  | 1.073653  | -0.537639 |
| 36 | 1 | 0 | 6.094676  | 1.904552  | -1.002514 |
| 37 | 6 | 0 | 8.007755  | -1.073212 | 0.537665  |
| 38 | 1 | 0 | 6.094733  | -1.904219 | 1.002442  |
| 39 | 6 | 0 | 8.715455  | 0.000241  | 0.000032  |
| 40 | 1 | 0 | 8.541977  | 1.913763  | -0.971364 |
| 41 | 1 | 0 | 8.542038  | -1.913285 | 0.971428  |
| 42 | 1 | 0 | 9.800252  | 0.000272  | 0.000065  |

## D

Thermal correction to Energy=

0.102955

Thermal correction to Enthalpy= 0.103899  
 Thermal correction to Gibbs Free Energy= 0.061367  
 Sum of electronic and zero-point Energies= -585.018512  
 Sum of electronic and thermal Energies= -585.010861  
 Sum of electronic and thermal Enthalpies= -585.009917  
 Sum of electronic and thermal Free Energies= -585.052448

Esol = -585.346213

---

| Center<br>Number | Atomic<br>Number | Atomic<br>Type | Coordinates (Angstroms) |           |           |
|------------------|------------------|----------------|-------------------------|-----------|-----------|
|                  |                  |                | X                       | Y         | Z         |
| 1                | 6                | 0              | 1.529287                | 1.140149  | 0.000086  |
| 2                | 6                | 0              | 0.139733                | 1.192126  | -0.000068 |
| 3                | 6                | 0              | -0.555418               | -0.012361 | -0.000156 |
| 4                | 6                | 0              | 0.149068                | -1.207049 | -0.000111 |
| 5                | 6                | 0              | 1.541440                | -1.139914 | 0.000024  |
| 6                | 7                | 0              | 2.227631                | 0.002026  | 0.000136  |
| 7                | 1                | 0              | 2.110671                | 2.058560  | 0.000160  |
| 8                | 1                | 0              | -0.367847               | -2.159167 | -0.000231 |
| 9                | 1                | 0              | 2.130786                | -2.053337 | 0.000035  |
| 10               | 1                | 0              | -0.384793               | 2.141558  | -0.000167 |
| 11               | 6                | 0              | -2.059422               | 0.010626  | -0.000000 |
| 12               | 9                | 0              | -2.580221               | -1.221750 | -0.002208 |
| 13               | 9                | 0              | -2.531879               | 0.654947  | -1.075774 |
| 14               | 9                | 0              | -2.531695               | 0.650911  | 1.078284  |

---

### TSD1

Thermal correction to Energy= 0.491235  
 Thermal correction to Enthalpy= 0.492179  
 Thermal correction to Gibbs Free Energy= 0.404740  
 Sum of electronic and zero-point Energies= -1406.880992  
 Sum of electronic and thermal Energies= -1406.853206  
 Sum of electronic and thermal Enthalpies= -1406.852261  
 Sum of electronic and thermal Free Energies= -1406.939700

Esol = -1407.865000

---

| Center<br>Number | Atomic<br>Number | Atomic<br>Type | Coordinates (Angstroms) |   |   |
|------------------|------------------|----------------|-------------------------|---|---|
|                  |                  |                | X                       | Y | Z |

---

|    |   |   |           |           |           |
|----|---|---|-----------|-----------|-----------|
| 1  | 6 | 0 | 2.029811  | -1.253188 | 1.230885  |
| 2  | 6 | 0 | 1.921086  | -1.608945 | -1.152447 |
| 3  | 6 | 0 | 0.691342  | -0.880104 | 1.186384  |
| 4  | 1 | 0 | 2.577227  | -1.261283 | 2.165616  |
| 5  | 6 | 0 | 0.587731  | -1.223655 | -1.102227 |
| 6  | 1 | 0 | 2.384727  | -1.895357 | -2.089643 |
| 7  | 1 | 0 | 0.134038  | -0.561961 | 2.063622  |
| 8  | 1 | 0 | -0.056016 | -1.179239 | -1.977024 |
| 9  | 7 | 0 | 0.004685  | -0.874299 | 0.044441  |
| 10 | 6 | 0 | 0.262636  | 3.312229  | 0.724607  |
| 11 | 6 | 0 | 0.596707  | 3.031318  | -0.773017 |
| 12 | 5 | 0 | -0.930270 | 1.517756  | -0.027655 |
| 13 | 8 | 0 | -0.416480 | 2.102584  | 1.114092  |
| 14 | 8 | 0 | -0.472963 | 2.150231  | -1.166390 |
| 15 | 6 | 0 | 0.595045  | 4.257027  | -1.671898 |
| 16 | 1 | 0 | 1.345295  | 4.981134  | -1.337257 |
| 17 | 1 | 0 | 0.836694  | 3.960786  | -2.695752 |
| 18 | 1 | 0 | -0.383183 | 4.740212  | -1.679331 |
| 19 | 6 | 0 | -0.727882 | 4.460481  | 0.904942  |
| 20 | 1 | 0 | -1.084103 | 4.456646  | 1.937691  |
| 21 | 1 | 0 | -0.264426 | 5.429061  | 0.696402  |
| 22 | 1 | 0 | -1.590079 | 4.332113  | 0.244471  |
| 23 | 6 | 0 | 1.472692  | 3.507768  | 1.624286  |
| 24 | 1 | 0 | 2.070701  | 4.362111  | 1.290409  |
| 25 | 1 | 0 | 1.140244  | 3.701535  | 2.647364  |
| 26 | 1 | 0 | 2.104903  | 2.617710  | 1.634243  |
| 27 | 6 | 0 | 1.895343  | 2.243078  | -0.948969 |
| 28 | 1 | 0 | 1.956368  | 1.896140  | -1.983787 |
| 29 | 1 | 0 | 2.775907  | 2.853733  | -0.730238 |
| 30 | 1 | 0 | 1.908507  | 1.364645  | -0.293675 |
| 31 | 6 | 0 | -3.198568 | -1.571104 | 0.761281  |
| 32 | 6 | 0 | -3.483352 | -1.288732 | -0.749959 |
| 33 | 5 | 0 | -1.751995 | 0.022565  | -0.012815 |
| 34 | 8 | 0 | -2.410596 | -0.435718 | 1.141843  |
| 35 | 8 | 0 | -2.319901 | -0.563336 | -1.166879 |
| 36 | 6 | 0 | -3.634505 | -2.533555 | -1.612071 |
| 37 | 1 | 0 | -4.470661 | -3.149451 | -1.264130 |
| 38 | 1 | 0 | -3.835244 | -2.238935 | -2.645662 |
| 39 | 1 | 0 | -2.725203 | -3.137814 | -1.601100 |
| 40 | 6 | 0 | -2.372939 | -2.842115 | 0.977317  |
| 41 | 1 | 0 | -2.006217 | -2.848746 | 2.007801  |
| 42 | 1 | 0 | -2.977234 | -3.740478 | 0.818365  |
| 43 | 1 | 0 | -1.512795 | -2.882282 | 0.305023  |
| 44 | 6 | 0 | -4.438800 | -1.616799 | 1.643184  |



|    |   |   |           |           |           |
|----|---|---|-----------|-----------|-----------|
| 45 | 1 | 0 | -5.125357 | -2.402075 | 1.308977  |
| 46 | 1 | 0 | -4.146294 | -1.834056 | 2.674109  |
| 47 | 1 | 0 | -4.962570 | -0.659821 | 1.633514  |
| 48 | 6 | 0 | -4.684466 | -0.363653 | -0.951376 |
| 49 | 1 | 0 | -4.698962 | -0.034741 | -1.993264 |
| 50 | 1 | 0 | -5.630396 | -0.865788 | -0.727535 |
| 51 | 1 | 0 | -4.595115 | 0.521267  | -0.314734 |
| 52 | 6 | 0 | 2.643426  | -1.616833 | 0.036995  |
| 53 | 6 | 0 | 4.106080  | -1.975773 | 0.003974  |
| 54 | 9 | 0 | 4.837270  | -0.956675 | -0.464496 |
| 55 | 9 | 0 | 4.568723  | -2.281465 | 1.220812  |
| 56 | 9 | 0 | 4.327225  | -3.024231 | -0.798081 |

---

### IntD1

|                                              |              |
|----------------------------------------------|--------------|
| Thermal correction to Energy=                | 0.492717     |
| Thermal correction to Enthalpy=              | 0.493662     |
| Thermal correction to Gibbs Free Energy=     | 0.405701     |
| Sum of electronic and zero-point Energies=   | -1406.882525 |
| Sum of electronic and thermal Energies=      | -1406.854430 |
| Sum of electronic and thermal Enthalpies=    | -1406.853485 |
| Sum of electronic and thermal Free Energies= | -1406.941446 |

Esol = -1407.8676756

---

| Center<br>Number | Atomic<br>Number | Atomic<br>Type | Coordinates (Angstroms) |           |           |
|------------------|------------------|----------------|-------------------------|-----------|-----------|
|                  |                  |                | X                       | Y         | Z         |
| 1                | 6                | 0              | -2.662676               | -0.793338 | 1.012506  |
| 2                | 6                | 0              | -2.977234               | 0.053269  | -1.220743 |
| 3                | 6                | 0              | -1.364583               | -0.309007 | 0.966997  |
| 4                | 1                | 0              | -3.029596               | -1.310623 | 1.890736  |
| 5                | 6                | 0              | -1.668845               | 0.514095  | -1.184352 |
| 6                | 1                | 0              | -3.592747               | 0.204428  | -2.099505 |
| 7                | 1                | 0              | -0.659923               | -0.412409 | 1.784890  |
| 8                | 1                | 0              | -1.194189               | 1.057236  | -1.995254 |
| 9                | 7                | 0              | -0.898890               | 0.330332  | -0.109085 |
| 10               | 6                | 0              | 2.325644                | -2.693071 | 0.460372  |
| 11               | 6                | 0              | 3.383545                | -2.037129 | -0.480021 |
| 12               | 5                | 0              | 1.660399                | -0.585276 | -0.119271 |
| 13               | 8                | 0              | 1.186485                | -1.826290 | 0.284059  |
| 14               | 8                | 0              | 2.995363                | -0.650806 | -0.455682 |
| 15               | 6                | 0              | 4.823452                | -2.158775 | -0.006545 |

|    |   |   |           |           |           |
|----|---|---|-----------|-----------|-----------|
| 16 | 1 | 0 | 5.117184  | -3.211096 | 0.069865  |
| 17 | 1 | 0 | 5.485523  | -1.670033 | -0.725727 |
| 18 | 1 | 0 | 4.963549  | -1.681258 | 0.964320  |
| 19 | 6 | 0 | 2.717977  | -2.612565 | 1.935121  |
| 20 | 1 | 0 | 1.854488  | -2.891914 | 2.544169  |
| 21 | 1 | 0 | 3.544223  | -3.289056 | 2.171369  |
| 22 | 1 | 0 | 3.009130  | -1.591979 | 2.199705  |
| 23 | 6 | 0 | 1.934301  | -4.115162 | 0.092095  |
| 24 | 1 | 0 | 2.806309  | -4.776342 | 0.128811  |
| 25 | 1 | 0 | 1.193525  | -4.488143 | 0.804227  |
| 26 | 1 | 0 | 1.499997  | -4.161009 | -0.907832 |
| 27 | 6 | 0 | 3.260276  | -2.510448 | -1.927608 |
| 28 | 1 | 0 | 3.869064  | -1.860751 | -2.560542 |
| 29 | 1 | 0 | 3.606677  | -3.541333 | -2.045831 |
| 30 | 1 | 0 | 2.223014  | -2.445300 | -2.268535 |
| 31 | 6 | 0 | 0.782827  | 2.977696  | 0.857530  |
| 32 | 6 | 0 | 1.293281  | 3.039364  | -0.616962 |
| 33 | 5 | 0 | 0.733114  | 0.866647  | -0.082196 |
| 34 | 8 | 0 | 0.895849  | 1.586326  | 1.156437  |
| 35 | 8 | 0 | 0.806025  | 1.814870  | -1.166495 |
| 36 | 6 | 0 | 0.745369  | 4.203179  | -1.430094 |
| 37 | 1 | 0 | 1.022424  | 5.160795  | -0.976527 |
| 38 | 1 | 0 | 1.160343  | 4.171172  | -2.441216 |
| 39 | 1 | 0 | -0.343098 | 4.153136  | -1.506217 |
| 40 | 6 | 0 | -0.683471 | 3.404804  | 0.981128  |
| 41 | 1 | 0 | -1.056203 | 3.094372  | 1.961499  |
| 42 | 1 | 0 | -0.796048 | 4.489849  | 0.892459  |
| 43 | 1 | 0 | -1.302145 | 2.933399  | 0.212164  |
| 44 | 6 | 0 | 1.629273  | 3.755944  | 1.855425  |
| 45 | 1 | 0 | 1.673371  | 4.817669  | 1.589380  |
| 46 | 1 | 0 | 1.190816  | 3.671083  | 2.853866  |
| 47 | 1 | 0 | 2.644004  | 3.356915  | 1.894473  |
| 48 | 6 | 0 | 2.820941  | 3.008367  | -0.695218 |
| 49 | 1 | 0 | 3.110596  | 2.837035  | -1.735054 |
| 50 | 1 | 0 | 3.267858  | 3.947652  | -0.354939 |
| 51 | 1 | 0 | 3.214618  | 2.182820  | -0.095212 |
| 52 | 6 | 0 | -3.473715 | -0.602610 | -0.100534 |
| 53 | 6 | 0 | -4.910644 | -1.056463 | -0.070928 |
| 54 | 9 | 0 | -5.348588 | -1.367893 | -1.295743 |
| 55 | 9 | 0 | -5.068515 | -2.128377 | 0.712257  |
| 56 | 9 | 0 | -5.703139 | -0.088974 | 0.406354  |

---

**TSD2**

Thermal correction to Energy= 0.596695  
 Thermal correction to Enthalpy= 0.597639  
 Thermal correction to Gibbs Free Energy= 0.493533  
 Sum of electronic and zero-point Energies= -1991.918348  
 Sum of electronic and thermal Energies= -1991.882008  
 Sum of electronic and thermal Enthalpies= -1991.881064  
 Sum of electronic and thermal Free Energies= -1991.985170

Esol =-1993.2218255

---

| Center<br>Number | Atomic<br>Number | Atomic<br>Type | Coordinates (Angstroms) |           |           |
|------------------|------------------|----------------|-------------------------|-----------|-----------|
|                  |                  |                | X                       | Y         | Z         |
| 1                | 6                | 0              | -1.480250               | 0.772049  | 2.420727  |
| 2                | 6                | 0              | -2.302929               | 1.563441  | 0.299335  |
| 3                | 6                | 0              | -0.196979               | 0.813946  | 1.894440  |
| 4                | 1                | 0              | -1.648015               | 0.450162  | 3.441654  |
| 5                | 6                | 0              | -0.990055               | 1.585191  | -0.148995 |
| 6                | 1                | 0              | -3.118617               | 1.848857  | -0.353711 |
| 7                | 1                | 0              | 0.684428                | 0.498362  | 2.443473  |
| 8                | 1                | 0              | -0.696383               | 1.890252  | -1.148442 |
| 9                | 7                | 0              | 0.022976                | 1.194220  | 0.630431  |
| 10               | 6                | 0              | 2.824577                | -2.348980 | 1.469726  |
| 11               | 6                | 0              | 3.223696                | -2.622254 | -0.014006 |
| 12               | 5                | 0              | 1.835822                | -0.800016 | 0.093717  |
| 13               | 8                | 0              | 1.681584                | -1.491781 | 1.327868  |
| 14               | 8                | 0              | 2.861122                | -1.393308 | -0.654138 |
| 15               | 6                | 0              | 4.709853                | -2.863908 | -0.235808 |
| 16               | 1                | 0              | 5.056035                | -3.730027 | 0.338589  |
| 17               | 1                | 0              | 4.893900                | -3.060039 | -1.295504 |
| 18               | 1                | 0              | 5.293384                | -1.988794 | 0.054804  |
| 19               | 6                | 0              | 3.889365                | -1.545383 | 2.218141  |
| 20               | 1                | 0              | 3.472765                | -1.222066 | 3.176053  |
| 21               | 1                | 0              | 4.789180                | -2.136687 | 2.411924  |
| 22               | 1                | 0              | 4.156722                | -0.650355 | 1.648093  |
| 23               | 6                | 0              | 2.433835                | -3.586459 | 2.262729  |
| 24               | 1                | 0              | 3.269965                | -4.291584 | 2.316083  |
| 25               | 1                | 0              | 2.164723                | -3.300318 | 3.283305  |
| 26               | 1                | 0              | 1.578216                | -4.092784 | 1.810869  |
| 27               | 6                | 0              | 2.410831                | -3.754875 | -0.643024 |
| 28               | 1                | 0              | 2.554783                | -3.723930 | -1.726334 |
| 29               | 1                | 0              | 2.733408                | -4.733690 | -0.274990 |
| 30               | 1                | 0              | 1.344162                | -3.635442 | -0.437825 |

|    |   |   |           |           |           |
|----|---|---|-----------|-----------|-----------|
| 31 | 6 | 0 | 2.844008  | 2.840507  | 0.007732  |
| 32 | 6 | 0 | 2.603123  | 2.413678  | -1.475293 |
| 33 | 5 | 0 | 1.583009  | 0.903276  | -0.051412 |
| 34 | 8 | 0 | 2.545549  | 1.642966  | 0.721535  |
| 35 | 8 | 0 | 1.496133  | 1.517034  | -1.363618 |
| 36 | 6 | 0 | 2.227994  | 3.554381  | -2.410565 |
| 37 | 1 | 0 | 3.023619  | 4.305994  | -2.446848 |
| 38 | 1 | 0 | 2.080695  | 3.166129  | -3.422320 |
| 39 | 1 | 0 | 1.302523  | 4.039622  | -2.092083 |
| 40 | 6 | 0 | 1.881608  | 3.944977  | 0.456413  |
| 41 | 1 | 0 | 1.917964  | 4.016952  | 1.546950  |
| 42 | 1 | 0 | 2.153917  | 4.916881  | 0.032818  |
| 43 | 1 | 0 | 0.852686  | 3.718695  | 0.161367  |
| 44 | 6 | 0 | 4.276852  | 3.247538  | 0.323213  |
| 45 | 1 | 0 | 4.592589  | 4.093419  | -0.297229 |
| 46 | 1 | 0 | 4.350605  | 3.546465  | 1.372693  |
| 47 | 1 | 0 | 4.958925  | 2.411734  | 0.158423  |
| 48 | 6 | 0 | 3.784462  | 1.625818  | -2.045559 |
| 49 | 1 | 0 | 3.478260  | 1.184279  | -2.998097 |
| 50 | 1 | 0 | 4.655792  | 2.264239  | -2.222071 |
| 51 | 1 | 0 | 4.058615  | 0.808630  | -1.372314 |
| 52 | 6 | 0 | -0.912757 | -1.818030 | 0.003398  |
| 53 | 6 | 0 | -2.252466 | -1.739635 | -0.349879 |
| 54 | 6 | 0 | -1.546982 | -0.856749 | -2.477402 |
| 55 | 6 | 0 | -0.231269 | -0.959635 | -2.027793 |
| 56 | 1 | 0 | -0.579769 | -2.170701 | 0.976935  |
| 57 | 1 | 0 | -3.033555 | -2.031085 | 0.343981  |
| 58 | 1 | 0 | -1.769695 | -0.466830 | -3.463490 |
| 59 | 7 | 0 | 0.066597  | -1.421446 | -0.814135 |
| 60 | 1 | 0 | 0.613313  | -0.618296 | -2.619810 |
| 61 | 6 | 0 | -2.542796 | 1.128015  | 1.595978  |
| 62 | 6 | 0 | -2.562557 | -1.237400 | -1.610853 |
| 63 | 6 | 0 | -3.961157 | 0.942711  | 2.064434  |
| 64 | 6 | 0 | -4.010297 | -1.042615 | -1.968395 |
| 65 | 9 | 0 | -4.170518 | -0.684980 | -3.245847 |
| 66 | 9 | 0 | -4.723413 | -2.152471 | -1.754748 |
| 67 | 9 | 0 | -4.553983 | -0.074941 | -1.205909 |
| 68 | 9 | 0 | -4.386978 | -0.298417 | 1.777458  |
| 69 | 9 | 0 | -4.070820 | 1.104867  | 3.387115  |
| 70 | 9 | 0 | -4.794253 | 1.798051  | 1.466611  |

---

## IntD2

Thermal correction to Energy=

0.597692

Thermal correction to Enthalpy= 0.598636  
 Thermal correction to Gibbs Free Energy= 0.491663  
 Sum of electronic and zero-point Energies= -1991.918383  
 Sum of electronic and thermal Energies= -1991.881631  
 Sum of electronic and thermal Enthalpies= -1991.880687  
 Sum of electronic and thermal Free Energies= -1991.987660

Esol =-1993.2235673

| Center<br>Number | Atomic<br>Number | Atomic<br>Type | Coordinates (Angstroms) |           |           |
|------------------|------------------|----------------|-------------------------|-----------|-----------|
|                  |                  |                | X                       | Y         | Z         |
| 1                | 6                | 0              | -0.993060               | -3.189131 | -0.811203 |
| 2                | 6                | 0              | -2.338442               | -1.849533 | 0.671582  |
| 3                | 6                | 0              | 0.114596                | -2.467192 | -0.397998 |
| 4                | 1                | 0              | -0.892427               | -3.976804 | -1.547968 |
| 5                | 6                | 0              | -1.182944               | -1.176879 | 1.041593  |
| 6                | 1                | 0              | -3.295185               | -1.583260 | 1.105142  |
| 7                | 1                | 0              | 1.117492                | -2.631234 | -0.776052 |
| 8                | 1                | 0              | -1.157140               | -0.374968 | 1.773975  |
| 9                | 7                | 0              | 0.005756                | -1.485765 | 0.508542  |
| 10               | 6                | 0              | 2.248440                | 0.019446  | -2.805441 |
| 11               | 6                | 0              | 2.777346                | 1.393187  | -2.283126 |
| 12               | 5                | 0              | 1.329355                | 0.481527  | -0.734274 |
| 13               | 8                | 0              | 1.086457                | -0.191838 | -2.001671 |
| 14               | 8                | 0              | 2.493885                | 1.315565  | -0.887487 |
| 15               | 6                | 0              | 4.273808                | 1.605902  | -2.460619 |
| 16               | 1                | 0              | 4.559666                | 1.542963  | -3.516201 |
| 17               | 1                | 0              | 4.550347                | 2.596939  | -2.089745 |
| 18               | 1                | 0              | 4.835043                | 0.861500  | -1.893366 |
| 19               | 6                | 0              | 3.230648                | -1.116862 | -2.509837 |
| 20               | 1                | 0              | 2.737216                | -2.068114 | -2.734760 |
| 21               | 1                | 0              | 4.134334                | -1.051605 | -3.123590 |
| 22               | 1                | 0              | 3.505765                | -1.110775 | -1.450141 |
| 23               | 6                | 0              | 1.849742                | 0.009923  | -4.274150 |
| 24               | 1                | 0              | 2.706357                | 0.250555  | -4.912875 |
| 25               | 1                | 0              | 1.488938                | -0.985029 | -4.550231 |
| 26               | 1                | 0              | 1.051348                | 0.728273  | -4.471119 |
| 27               | 6                | 0              | 2.005189                | 2.571728  | -2.885258 |
| 28               | 1                | 0              | 2.231874                | 3.469725  | -2.303395 |
| 29               | 1                | 0              | 2.285780                | 2.752952  | -3.927600 |
| 30               | 1                | 0              | 0.925768                | 2.396884  | -2.844880 |
| 31               | 6                | 0              | 2.777350                | -1.393192 | 2.283135  |

|    |   |   |           |           |           |
|----|---|---|-----------|-----------|-----------|
| 32 | 6 | 0 | 2.248419  | -0.019465 | 2.805460  |
| 33 | 5 | 0 | 1.329359  | -0.481539 | 0.734280  |
| 34 | 8 | 0 | 2.493901  | -1.315560 | 0.887494  |
| 35 | 8 | 0 | 1.086441  | 0.191811  | 2.001682  |
| 36 | 6 | 0 | 1.849707  | -0.009966 | 4.274165  |
| 37 | 1 | 0 | 2.706319  | -0.250594 | 4.912896  |
| 38 | 1 | 0 | 1.488887  | 0.984978  | 4.550255  |
| 39 | 1 | 0 | 1.051321  | -0.728329 | 4.471118  |
| 40 | 6 | 0 | 2.005203  | -2.571750 | 2.885247  |
| 41 | 1 | 0 | 2.231911  | -3.469739 | 2.303381  |
| 42 | 1 | 0 | 2.285782  | -2.752977 | 3.927592  |
| 43 | 1 | 0 | 0.925780  | -2.396923 | 2.844854  |
| 44 | 6 | 0 | 4.273813  | -1.605888 | 2.460641  |
| 45 | 1 | 0 | 4.559660  | -1.542956 | 3.516226  |
| 46 | 1 | 0 | 4.550370  | -2.596917 | 2.089758  |
| 47 | 1 | 0 | 4.835043  | -0.861472 | 1.893401  |
| 48 | 6 | 0 | 3.230615  | 1.116860  | 2.509880  |
| 49 | 1 | 0 | 2.737171  | 2.068102  | 2.734819  |
| 50 | 1 | 0 | 4.134299  | 1.051603  | 3.123635  |
| 51 | 1 | 0 | 3.505736  | 1.110796  | 1.450185  |
| 52 | 6 | 0 | -1.183021 | 1.176692  | -1.041410 |
| 53 | 6 | 0 | -2.338507 | 1.849361  | -0.671386 |
| 54 | 6 | 0 | -0.993007 | 3.189304  | 0.810982  |
| 55 | 6 | 0 | 0.114631  | 2.467337  | 0.397781  |
| 56 | 1 | 0 | -1.157267 | 0.374645  | -1.773644 |
| 57 | 1 | 0 | -3.295289 | 1.582962  | -1.104782 |
| 58 | 1 | 0 | -0.892321 | 3.977124  | 1.547583  |
| 59 | 7 | 0 | 0.005729  | 1.485732  | -0.508559 |
| 60 | 1 | 0 | 1.117565  | 2.631499  | 0.775684  |
| 61 | 6 | 0 | -2.233888 | -2.867788 | -0.269209 |
| 62 | 6 | 0 | -2.233887 | 2.867799  | 0.269199  |
| 63 | 6 | 0 | -3.454985 | -3.655659 | -0.663928 |
| 64 | 6 | 0 | -3.454970 | 3.655692  | 0.663917  |
| 65 | 9 | 0 | -3.358855 | 4.107196  | 1.919704  |
| 66 | 9 | 0 | -3.621020 | 4.717684  | -0.133131 |
| 67 | 9 | 0 | -4.563780 | 2.910594  | 0.575388  |
| 68 | 9 | 0 | -4.563819 | -2.910631 | -0.575093 |
| 69 | 9 | 0 | -3.359021 | -4.106893 | -1.919823 |
| 70 | 9 | 0 | -3.620877 | -4.717826 | 0.132920  |

---

### TSD3

Thermal correction to Energy=

0.596759

Thermal correction to Enthalpy=

0.597703

Thermal correction to Gibbs Free Energy= 0.494519  
 Sum of electronic and zero-point Energies= -1991.909698  
 Sum of electronic and thermal Energies= -1991.873751  
 Sum of electronic and thermal Enthalpies= -1991.872807  
 Sum of electronic and thermal Free Energies= -1991.975991

Esol = -1993.2141484

| Center<br>Number | Atomic<br>Number | Atomic<br>Type | Coordinates (Angstroms) |           |           |
|------------------|------------------|----------------|-------------------------|-----------|-----------|
|                  |                  |                | X                       | Y         | Z         |
| 1                | 6                | 0              | -0.970158               | 3.205963  | -0.372294 |
| 2                | 6                | 0              | -2.425208               | 1.397428  | -1.000408 |
| 3                | 6                | 0              | 0.107269                | 2.396691  | -0.591370 |
| 4                | 1                | 0              | -0.815752               | 4.234170  | -0.065365 |
| 5                | 6                | 0              | -1.301563               | 0.602451  | -1.194684 |
| 6                | 1                | 0              | -3.408790               | 0.980870  | -1.184591 |
| 7                | 1                | 0              | 1.134613                | 2.716329  | -0.476413 |
| 8                | 1                | 0              | -1.347461               | -0.406050 | -1.589395 |
| 9                | 7                | 0              | -0.045675               | 1.093663  | -1.000301 |
| 10               | 6                | 0              | 2.229678                | 1.253397  | 2.454304  |
| 11               | 6                | 0              | 2.877488                | -0.170644 | 2.501654  |
| 12               | 5                | 0              | 1.147921                | -0.175726 | 1.031008  |
| 13               | 8                | 0              | 0.979167                | 1.006468  | 1.786370  |
| 14               | 8                | 0              | 2.404423                | -0.772277 | 1.286044  |
| 15               | 6                | 0              | 4.397326                | -0.177964 | 2.484086  |
| 16               | 1                | 0              | 4.800936                | 0.371459  | 3.340982  |
| 17               | 1                | 0              | 4.758791                | -1.208445 | 2.537635  |
| 18               | 1                | 0              | 4.773129                | 0.271025  | 1.562913  |
| 19               | 6                | 0              | 3.038750                | 2.233151  | 1.606472  |
| 20               | 1                | 0              | 2.452324                | 3.148720  | 1.480505  |
| 21               | 1                | 0              | 3.980203                | 2.501135  | 2.095220  |
| 22               | 1                | 0              | 3.248314                | 1.807899  | 0.620449  |
| 23               | 6                | 0              | 1.934756                | 1.855782  | 3.820218  |
| 24               | 1                | 0              | 2.857312                | 1.972553  | 4.398674  |
| 25               | 1                | 0              | 1.484546                | 2.843739  | 3.693030  |
| 26               | 1                | 0              | 1.239084                | 1.234485  | 4.386570  |
| 27               | 6                | 0              | 2.348320                | -1.010921 | 3.665050  |
| 28               | 1                | 0              | 2.668917                | -2.045919 | 3.521129  |
| 29               | 1                | 0              | 2.727455                | -0.658170 | 4.628517  |
| 30               | 1                | 0              | 1.254157                | -0.990654 | 3.692477  |
| 31               | 6                | 0              | 2.877510                | 0.170629  | -2.501639 |
| 32               | 6                | 0              | 2.229692                | -1.253408 | -2.454294 |

|    |   |   |           |           |           |
|----|---|---|-----------|-----------|-----------|
| 33 | 5 | 0 | 1.147934  | 0.175722  | -1.031004 |
| 34 | 8 | 0 | 2.404443  | 0.772263  | -1.286030 |
| 35 | 8 | 0 | 0.979177  | -1.006471 | -1.786368 |
| 36 | 6 | 0 | 1.934776  | -1.855791 | -3.820210 |
| 37 | 1 | 0 | 2.857335  | -1.972566 | -4.398660 |
| 38 | 1 | 0 | 1.484561  | -2.843746 | -3.693025 |
| 39 | 1 | 0 | 1.239111  | -1.234491 | -4.386566 |
| 40 | 6 | 0 | 2.348353  | 1.010910  | -3.665036 |
| 41 | 1 | 0 | 2.668954  | 2.045906  | -3.521113 |
| 42 | 1 | 0 | 2.727491  | 0.658158  | -4.628502 |
| 43 | 1 | 0 | 1.254190  | 0.990649  | -3.692469 |
| 44 | 6 | 0 | 4.397348  | 0.177940  | -2.484063 |
| 45 | 1 | 0 | 4.800959  | -0.371484 | -3.340958 |
| 46 | 1 | 0 | 4.758819  | 1.208419  | -2.537610 |
| 47 | 1 | 0 | 4.773144  | -0.271052 | -1.562889 |
| 48 | 6 | 0 | 3.038751  | -2.233166 | -1.606455 |
| 49 | 1 | 0 | 2.452317  | -3.148731 | -1.480490 |
| 50 | 1 | 0 | 3.980205  | -2.501158 | -2.095196 |
| 51 | 1 | 0 | 3.248311  | -1.807913 | -0.620431 |
| 52 | 6 | 0 | -1.301581 | -0.602434 | 1.194656  |
| 53 | 6 | 0 | -2.425231 | -1.397402 | 1.000366  |
| 54 | 6 | 0 | -0.970187 | -3.205953 | 0.372282  |
| 55 | 6 | 0 | 0.107245  | -2.396689 | 0.591367  |
| 56 | 1 | 0 | -1.347477 | 0.406069  | 1.589361  |
| 57 | 1 | 0 | -3.408811 | -0.980833 | 1.184529  |
| 58 | 1 | 0 | -0.815788 | -4.234160 | 0.065350  |
| 59 | 7 | 0 | -0.045695 | -1.093658 | 1.000292  |
| 60 | 1 | 0 | 1.134587  | -2.716334 | 0.476421  |
| 61 | 6 | 0 | -2.271818 | 2.702768  | -0.573799 |
| 62 | 6 | 0 | -2.271845 | -2.702745 | 0.573765  |
| 63 | 6 | 0 | -3.446611 | -3.592820 | 0.320901  |
| 64 | 6 | 0 | -3.446585 | 3.592834  | -0.320909 |
| 65 | 9 | 0 | -4.602468 | -3.003916 | 0.655269  |
| 66 | 9 | 0 | -3.533009 | -3.942667 | -0.973333 |
| 67 | 9 | 0 | -3.354104 | -4.736302 | 1.018110  |
| 68 | 9 | 0 | -3.353911 | 4.736474  | -1.017833 |
| 69 | 9 | 0 | -4.602415 | 3.004058  | -0.655598 |
| 70 | 9 | 0 | -3.533194 | 3.942375  | 0.973393  |

---

### IntD3

|                                          |          |
|------------------------------------------|----------|
| Thermal correction to Energy=            | 0.601435 |
| Thermal correction to Enthalpy=          | 0.602379 |
| Thermal correction to Gibbs Free Energy= | 0.497656 |



Sum of electronic and zero-point Energies= -1991.979359  
 Sum of electronic and thermal Energies= -1991.943251  
 Sum of electronic and thermal Enthalpies= -1991.942307  
 Sum of electronic and thermal Free Energies= -1992.047030

Esol =-1993.2940619

---

| Center<br>Number | Atomic<br>Number | Atomic<br>Type | Coordinates (Angstroms) |           |           |
|------------------|------------------|----------------|-------------------------|-----------|-----------|
|                  |                  |                | X                       | Y         | Z         |
| 1                | 6                | 0              | -1.184406               | 2.920644  | -0.054868 |
| 2                | 6                | 0              | -2.260895               | 0.865913  | -0.801220 |
| 3                | 6                | 0              | 0.026494                | 2.375406  | -0.272145 |
| 4                | 1                | 0              | -1.284083               | 3.937081  | 0.301578  |
| 5                | 6                | 0              | -0.957637               | 0.161531  | -0.537937 |
| 6                | 1                | 0              | -3.109109               | 0.312436  | -1.187142 |
| 7                | 1                | 0              | 0.953370                | 2.924935  | -0.150210 |
| 8                | 1                | 0              | -0.820927               | -0.693844 | -1.206522 |
| 9                | 7                | 0              | 0.167112                | 1.075577  | -0.740423 |
| 10               | 6                | 0              | 2.406366                | 1.466615  | 2.998055  |
| 11               | 6                | 0              | 3.267644                | 0.157803  | 3.061731  |
| 12               | 5                | 0              | 1.362765                | -0.221651 | 1.917285  |
| 13               | 8                | 0              | 1.125052                | 0.973924  | 2.544630  |
| 14               | 8                | 0              | 2.662657                | -0.662381 | 2.037111  |
| 15               | 6                | 0              | 4.737595                | 0.346479  | 2.729626  |
| 16               | 1                | 0              | 5.209515                | 1.023327  | 3.448830  |
| 17               | 1                | 0              | 5.249329                | -0.618010 | 2.778814  |
| 18               | 1                | 0              | 4.865167                | 0.756450  | 1.726215  |
| 19               | 6                | 0              | 2.911590                | 2.456892  | 1.953643  |
| 20               | 1                | 0              | 2.170485                | 3.253525  | 1.848015  |
| 21               | 1                | 0              | 3.858749                | 2.908279  | 2.262797  |
| 22               | 1                | 0              | 3.045980                | 1.977475  | 0.978485  |
| 23               | 6                | 0              | 2.210810                | 2.161430  | 4.336027  |
| 24               | 1                | 0              | 3.174702                | 2.473996  | 4.750211  |
| 25               | 1                | 0              | 1.594019                | 3.052240  | 4.194689  |
| 26               | 1                | 0              | 1.710802                | 1.510427  | 5.054322  |
| 27               | 6                | 0              | 3.107183                | -0.593385 | 4.381366  |
| 28               | 1                | 0              | 3.564295                | -1.580628 | 4.281624  |
| 29               | 1                | 0              | 3.592665                | -0.063983 | 5.205472  |
| 30               | 1                | 0              | 2.049628                | -0.728925 | 4.626387  |
| 31               | 6                | 0              | 3.445046                | 0.746000  | -2.233932 |
| 32               | 6                | 0              | 2.927176                | -0.733253 | -2.272540 |
| 33               | 5                | 0              | 1.392831                | 0.616841  | -1.309062 |

|    |   |   |           |           |           |
|----|---|---|-----------|-----------|-----------|
| 34 | 8 | 0 | 2.549224  | 1.364469  | -1.284067 |
| 35 | 8 | 0 | 1.523094  | -0.580085 | -1.965441 |
| 36 | 6 | 0 | 3.057081  | -1.412534 | -3.626119 |
| 37 | 1 | 0 | 4.108041  | -1.465872 | -3.927950 |
| 38 | 1 | 0 | 2.667496  | -2.431119 | -3.559887 |
| 39 | 1 | 0 | 2.495065  | -0.881073 | -4.395230 |
| 40 | 6 | 0 | 3.254676  | 1.475879  | -3.561451 |
| 41 | 1 | 0 | 3.443334  | 2.540801  | -3.407540 |
| 42 | 1 | 0 | 3.943902  | 1.104591  | -4.324439 |
| 43 | 1 | 0 | 2.230546  | 1.359018  | -3.927891 |
| 44 | 6 | 0 | 4.871136  | 0.907412  | -1.736203 |
| 45 | 1 | 0 | 5.568983  | 0.385624  | -2.398783 |
| 46 | 1 | 0 | 5.136754  | 1.967575  | -1.724551 |
| 47 | 1 | 0 | 4.984438  | 0.510528  | -0.725538 |
| 48 | 6 | 0 | 3.540054  | -1.602289 | -1.178926 |
| 49 | 1 | 0 | 3.007439  | -2.556817 | -1.157922 |
| 50 | 1 | 0 | 4.596751  | -1.802755 | -1.377551 |
| 51 | 1 | 0 | 3.446095  | -1.130800 | -0.194955 |
| 52 | 6 | 0 | -0.947666 | -0.379510 | 0.930406  |
| 53 | 6 | 0 | -2.042332 | -1.398526 | 1.099097  |
| 54 | 6 | 0 | -0.413652 | -3.106183 | 0.493023  |
| 55 | 6 | 0 | 0.593052  | -2.266067 | 0.794714  |
| 56 | 1 | 0 | -1.092848 | 0.477296  | 1.595543  |
| 57 | 1 | 0 | -3.033244 | -1.083100 | 1.404236  |
| 58 | 1 | 0 | -0.217755 | -4.115264 | 0.155796  |
| 59 | 7 | 0 | 0.355104  | -0.971944 | 1.239654  |
| 60 | 1 | 0 | 1.636358  | -2.559894 | 0.764089  |
| 61 | 6 | 0 | -2.354605 | 2.161336  | -0.474458 |
| 62 | 6 | 0 | -1.771139 | -2.674608 | 0.797830  |
| 63 | 6 | 0 | -3.641616 | 2.912985  | -0.617297 |
| 64 | 6 | 0 | -2.823091 | -3.737263 | 0.877886  |
| 65 | 9 | 0 | -2.903804 | -4.418392 | -0.278335 |
| 66 | 9 | 0 | -4.038663 | -3.242173 | 1.140523  |
| 67 | 9 | 0 | -2.540039 | -4.636589 | 1.833652  |
| 68 | 9 | 0 | -4.649173 | 2.137256  | -1.036169 |
| 69 | 9 | 0 | -4.008578 | 3.454831  | 0.556838  |
| 70 | 9 | 0 | -3.525083 | 3.928998  | -1.487454 |

---

#### TSD4

|                                            |              |
|--------------------------------------------|--------------|
| Thermal correction to Energy=              | 0.597329     |
| Thermal correction to Enthalpy=            | 0.598273     |
| Thermal correction to Gibbs Free Energy=   | 0.492892     |
| Sum of electronic and zero-point Energies= | -1991.930028 |

Sum of electronic and thermal Energies= -1991.893642  
 Sum of electronic and thermal Enthalpies= -1991.892697  
 Sum of electronic and thermal Free Energies= -1991.998078

Esol =-1993.2433571

| Center<br>Number | Atomic<br>Number | Atomic<br>Type | Coordinates (Angstroms) |           |           |
|------------------|------------------|----------------|-------------------------|-----------|-----------|
|                  |                  |                | X                       | Y         | Z         |
| 1                | 6                | 0              | 1.814550                | -0.702671 | -3.101333 |
| 2                | 6                | 0              | 3.291491                | 0.452983  | -1.575415 |
| 3                | 6                | 0              | 0.747838                | -0.186073 | -2.456980 |
| 4                | 1                | 0              | 1.659251                | -1.340746 | -3.963606 |
| 5                | 6                | 0              | 2.183126                | 0.884343  | -0.853507 |
| 6                | 1                | 0              | 4.278316                | 0.725296  | -1.216735 |
| 7                | 1                | 0              | -0.273026               | -0.350855 | -2.772436 |
| 8                | 1                | 0              | 2.248228                | 1.615242  | -0.057322 |
| 9                | 7                | 0              | 0.890181                | 0.659836  | -1.348745 |
| 10               | 6                | 0              | -1.460046               | -2.860910 | -0.366706 |
| 11               | 6                | 0              | -2.259847               | -2.346760 | 0.883271  |
| 12               | 5                | 0              | -0.242155               | -1.357245 | 0.803330  |
| 13               | 8                | 0              | -0.123559               | -2.368241 | -0.111559 |
| 14               | 8                | 0              | -1.525389               | -1.158327 | 1.261396  |
| 15               | 6                | 0              | -3.700793               | -1.960477 | 0.599764  |
| 16               | 1                | 0              | -4.270146               | -2.829651 | 0.255848  |
| 17               | 1                | 0              | -4.165133               | -1.589372 | 1.517506  |
| 18               | 1                | 0              | -3.757263               | -1.178876 | -0.159571 |
| 19               | 6                | 0              | -1.944894               | -2.242439 | -1.672582 |
| 20               | 1                | 0              | -1.224338               | -2.486896 | -2.457254 |
| 21               | 1                | 0              | -2.920085               | -2.646738 | -1.959120 |
| 22               | 1                | 0              | -2.023096               | -1.154523 | -1.588400 |
| 23               | 6                | 0              | -1.393380               | -4.374852 | -0.494252 |
| 24               | 1                | 0              | -2.398395               | -4.794791 | -0.602845 |
| 25               | 1                | 0              | -0.814923               | -4.637385 | -1.383271 |
| 26               | 1                | 0              | -0.911718               | -4.828817 | 0.372884  |
| 27               | 6                | 0              | -2.182491               | -3.303450 | 2.070712  |
| 28               | 1                | 0              | -2.590472               | -2.803756 | 2.952402  |
| 29               | 1                | 0              | -2.755428               | -4.216470 | 1.888625  |
| 30               | 1                | 0              | -1.144944               | -3.578710 | 2.282529  |
| 31               | 6                | 0              | -2.259675               | 2.346986  | -0.883166 |
| 32               | 6                | 0              | -1.459791               | 2.860961  | 0.366825  |
| 33               | 5                | 0              | -0.242150               | 1.357135  | -0.803281 |
| 34               | 8                | 0              | -1.525432               | 1.158423  | -1.261314 |

|    |   |   |           |           |           |
|----|---|---|-----------|-----------|-----------|
| 35 | 8 | 0 | -0.123388 | 2.368071  | 0.111657  |
| 36 | 6 | 0 | -1.392866 | 4.374887  | 0.494415  |
| 37 | 1 | 0 | -2.397812 | 4.794998  | 0.602986  |
| 38 | 1 | 0 | -0.814394 | 4.637294  | 1.383462  |
| 39 | 1 | 0 | -0.911097 | 4.828793  | -0.372692 |
| 40 | 6 | 0 | -2.182121 | 3.303691  | -2.070584 |
| 41 | 1 | 0 | -2.590176 | 2.804096  | -2.952295 |
| 42 | 1 | 0 | -2.754889 | 4.216814  | -1.888487 |
| 43 | 1 | 0 | -1.144518 | 3.578763  | -2.282374 |
| 44 | 6 | 0 | -3.700703 | 1.960991  | -0.599685 |
| 45 | 1 | 0 | -4.269870 | 2.830279  | -0.255751 |
| 46 | 1 | 0 | -4.165116 | 1.590011  | -1.517439 |
| 47 | 1 | 0 | -3.757362 | 1.179384  | 0.159630  |
| 48 | 6 | 0 | -1.944739 | 2.242523  | 1.672677  |
| 49 | 1 | 0 | -1.224036 | 2.486669  | 2.457307  |
| 50 | 1 | 0 | -2.919775 | 2.647117  | 1.959330  |
| 51 | 1 | 0 | -2.023311 | 1.154644  | 1.588354  |
| 52 | 6 | 0 | 2.183168  | -0.884686 | 0.853456  |
| 53 | 6 | 0 | 3.291590  | -0.453408 | 1.575326  |
| 54 | 6 | 0 | 1.814788  | 0.702465  | 3.101221  |
| 55 | 6 | 0 | 0.748016  | 0.185943  | 2.456907  |
| 56 | 1 | 0 | 2.248176  | -1.615617 | 0.057290  |
| 57 | 1 | 0 | 4.278383  | -0.725827 | 1.216638  |
| 58 | 1 | 0 | 1.659568  | 1.340596  | 3.963466  |
| 59 | 7 | 0 | 0.890264  | -0.660044 | 1.348723  |
| 60 | 1 | 0 | -0.272837 | 0.350817  | 2.772342  |
| 61 | 6 | 0 | 3.143291  | -0.363689 | -2.676961 |
| 62 | 6 | 0 | 3.143487  | 0.363318  | 2.676848  |
| 63 | 6 | 0 | 4.305248  | 0.925407  | 3.410562  |
| 64 | 6 | 0 | 4.304982  | -0.925833 | -3.410745 |
| 65 | 9 | 0 | 4.213570  | -0.709093 | -4.737379 |
| 66 | 9 | 0 | 4.399897  | -2.264246 | -3.266569 |
| 67 | 9 | 0 | 5.468671  | -0.402597 | -2.995843 |
| 68 | 9 | 0 | 5.468846  | 0.401759  | 2.995923  |
| 69 | 9 | 0 | 4.213651  | 0.709086  | 4.737251  |
| 70 | 9 | 0 | 4.400514  | 2.263756  | 3.265996  |

---

#### IntD4

|                                            |             |
|--------------------------------------------|-------------|
| Thermal correction to Energy=              | 0.296011    |
| Thermal correction to Enthalpy=            | 0.296955    |
| Thermal correction to Gibbs Free Energy=   | 0.232812    |
| Sum of electronic and zero-point Energies= | -995.961767 |
| Sum of electronic and thermal Energies=    | -995.944425 |

Sum of electronic and thermal Enthalpies= -995.943480

Sum of electronic and thermal Free Energies= -996.007624

Esol =-996.6203033

---

| Center<br>Number | Atomic<br>Number | Atomic<br>Type | Coordinates (Angstroms) |           |           |
|------------------|------------------|----------------|-------------------------|-----------|-----------|
|                  |                  |                | X                       | Y         | Z         |
| 1                | 6                | 0              | 2.238434                | 1.222533  | -0.177713 |
| 2                | 6                | 0              | 2.245924                | -1.176718 | 0.192549  |
| 3                | 6                | 0              | 0.878620                | 1.205776  | -0.172164 |
| 4                | 1                | 0              | 2.754818                | 2.163740  | -0.323512 |
| 5                | 6                | 0              | 0.889695                | -1.171403 | 0.193118  |
| 6                | 1                | 0              | 0.268081                | 2.088909  | -0.306218 |
| 7                | 1                | 0              | 0.286726                | -2.059504 | 0.331047  |
| 8                | 7                | 0              | 0.165255                | 0.013469  | 0.010654  |
| 9                | 6                | 0              | -3.381464               | 0.770254  | 0.103051  |
| 10               | 6                | 0              | -3.371605               | -0.781677 | -0.108198 |
| 11               | 5                | 0              | -1.270989               | 0.005870  | 0.007438  |
| 12               | 8                | 0              | -2.018399               | 1.131396  | -0.222396 |
| 13               | 8                | 0              | -2.008201               | -1.127575 | 0.232014  |
| 14               | 6                | 0              | -4.315410               | -1.552929 | 0.797925  |
| 15               | 1                | 0              | -5.350209               | -1.242239 | 0.622084  |
| 16               | 1                | 0              | -4.237356               | -2.621349 | 0.582666  |
| 17               | 1                | 0              | -4.073150               | -1.396453 | 1.849926  |
| 18               | 6                | 0              | -3.611390               | 1.164422  | 1.559628  |
| 19               | 1                | 0              | -3.390611               | 2.227995  | 1.674976  |
| 20               | 1                | 0              | -4.646929               | 0.987625  | 1.862466  |
| 21               | 1                | 0              | -2.950632               | 0.601374  | 2.225337  |
| 22               | 6                | 0              | -4.323965               | 1.530539  | -0.813717 |
| 23               | 1                | 0              | -5.356089               | 1.202236  | -0.654973 |
| 24               | 1                | 0              | -4.266638               | 2.599170  | -0.593062 |
| 25               | 1                | 0              | -4.063364               | 1.382382  | -1.862571 |
| 26               | 6                | 0              | -3.581616               | -1.177401 | -1.567357 |
| 27               | 1                | 0              | -3.350055               | -2.238880 | -1.680880 |
| 28               | 1                | 0              | -4.615260               | -1.009466 | -1.881410 |
| 29               | 1                | 0              | -2.918765               | -0.607904 | -2.225448 |
| 30               | 6                | 0              | 2.971694                | 0.029050  | 0.004645  |
| 31               | 1                | 0              | 2.769518                | -2.115373 | 0.337552  |
| 32               | 6                | 0              | 4.453374                | 0.000870  | -0.004456 |
| 33               | 9                | 0              | 4.945438                | -0.783659 | -0.986518 |
| 34               | 9                | 0              | 4.978752                | 1.224974  | -0.175708 |
| 35               | 9                | 0              | 4.964381                | -0.496467 | 1.141054  |

---

**E**

|                                              |             |
|----------------------------------------------|-------------|
| Thermal correction to Energy=                | 0.102943    |
| Thermal correction to Enthalpy=              | 0.103887    |
| Thermal correction to Gibbs Free Energy=     | 0.061617    |
| Sum of electronic and zero-point Energies=   | -585.018931 |
| Sum of electronic and thermal Energies=      | -585.011280 |
| Sum of electronic and thermal Enthalpies=    | -585.010336 |
| Sum of electronic and thermal Free Energies= | -585.052606 |

Esol =-585.3466388

---

| Center<br>Number | Atomic<br>Number | Atomic<br>Type | Coordinates (Angstroms) |           |           |
|------------------|------------------|----------------|-------------------------|-----------|-----------|
|                  |                  |                | X                       | Y         | Z         |
| 1                | 6                | 0              | 1.516723                | 1.126428  | 0.146702  |
| 2                | 6                | 0              | 0.123038                | 1.163387  | 0.117839  |
| 3                | 6                | 0              | -0.566312               | -0.036399 | 0.022851  |
| 4                | 6                | 0              | 0.172294                | -1.214155 | -0.037782 |
| 5                | 6                | 0              | 1.561828                | -1.145609 | -0.005299 |
| 6                | 7                | 0              | 2.232201                | 0.003353  | 0.085246  |
| 7                | 1                | 0              | 2.085986                | 2.050008  | 0.221154  |
| 8                | 1                | 0              | 2.154144                | -2.055014 | -0.060841 |
| 9                | 1                | 0              | -0.400720               | 2.111067  | 0.165773  |
| 10               | 6                | 0              | -0.535285               | -2.535327 | -0.099864 |
| 11               | 9                | 0              | -1.037738               | -2.879467 | 1.095271  |
| 12               | 9                | 0              | -1.567464               | -2.493506 | -0.956236 |
| 13               | 9                | 0              | 0.281176                | -3.521728 | -0.489342 |
| 14               | 1                | 0              | -1.651032               | -0.067181 | -0.010723 |

---

**TSE1**

|                                              |              |
|----------------------------------------------|--------------|
| Thermal correction to Energy=                | 0.491497     |
| Thermal correction to Enthalpy=              | 0.492442     |
| Thermal correction to Gibbs Free Energy=     | 0.406087     |
| Sum of electronic and zero-point Energies=   | -1406.882094 |
| Sum of electronic and thermal Energies=      | -1406.854378 |
| Sum of electronic and thermal Enthalpies=    | -1406.853434 |
| Sum of electronic and thermal Free Energies= | -1406.939789 |

Esol =-1407.8655805

| Center<br>Number | Atomic<br>Number | Atomic<br>Type | Coordinates (Angstroms) |           |           |
|------------------|------------------|----------------|-------------------------|-----------|-----------|
|                  |                  |                | X                       | Y         | Z         |
| 1                | 6                | 0              | 1.146141                | -1.443792 | 2.592865  |
| 2                | 6                | 0              | 1.712920                | -2.168085 | 0.380460  |
| 3                | 6                | 0              | 0.063581                | -0.769636 | 2.039556  |
| 4                | 1                | 0              | 1.324892                | -1.408978 | 3.660797  |
| 5                | 6                | 0              | 0.603724                | -1.478258 | -0.095829 |
| 6                | 1                | 0              | -0.634188               | -0.176558 | 2.625919  |
| 7                | 1                | 0              | 0.329779                | -1.443221 | -1.147572 |
| 8                | 7                | 0              | -0.191086               | -0.803510 | 0.730572  |
| 9                | 6                | 0              | 1.198459                | 3.313402  | 0.339541  |
| 10               | 6                | 0              | 1.872080                | 2.295945  | -0.631240 |
| 11               | 5                | 0              | -0.246691               | 1.619172  | -0.144676 |
| 12               | 8                | 0              | 0.051333                | 2.573251  | 0.804678  |
| 13               | 8                | 0              | 0.741854                | 1.542455  | -1.110097 |
| 14               | 6                | 0              | 2.598273                | 2.917612  | -1.812924 |
| 15               | 1                | 0              | 3.408464                | 3.568679  | -1.468492 |
| 16               | 1                | 0              | 3.032034                | 2.128123  | -2.431681 |
| 17               | 1                | 0              | 1.915799                | 3.500502  | -2.432995 |
| 18               | 6                | 0              | 0.670920                | 4.554004  | -0.379190 |
| 19               | 1                | 0              | 0.025042                | 5.107631  | 0.306201  |
| 20               | 1                | 0              | 1.485339                | 5.209225  | -0.701219 |
| 21               | 1                | 0              | 0.079484                | 4.270751  | -1.254330 |
| 22               | 6                | 0              | 2.045259                | 3.715367  | 1.536871  |
| 23               | 1                | 0              | 2.972743                | 4.196237  | 1.209262  |
| 24               | 1                | 0              | 1.490341                | 4.425855  | 2.154541  |
| 25               | 1                | 0              | 2.295098                | 2.850322  | 2.153457  |
| 26               | 6                | 0              | 2.784437                | 1.305577  | 0.094209  |
| 27               | 1                | 0              | 3.041230                | 0.491913  | -0.589043 |
| 28               | 1                | 0              | 3.708559                | 1.780936  | 0.435468  |
| 29               | 1                | 0              | 2.273560                | 0.874948  | 0.963370  |
| 30               | 6                | 0              | -3.513845               | -0.433440 | 0.553378  |
| 31               | 6                | 0              | -3.339028               | -0.504122 | -0.998334 |
| 32               | 5                | 0              | -1.488737               | 0.452537  | -0.037881 |
| 33               | 8                | 0              | -2.506327               | 0.514153  | 0.932669  |
| 34               | 8                | 0              | -1.939056               | -0.257024 | -1.174991 |
| 35               | 6                | 0              | -3.694018               | -1.847689 | -1.619342 |
| 36               | 1                | 0              | -4.742826               | -2.099558 | -1.429865 |
| 37               | 1                | 0              | -3.544114               | -1.799367 | -2.701041 |
| 38               | 1                | 0              | -3.063039               | -2.646031 | -1.224427 |
| 39               | 6                | 0              | -3.220924               | -1.771834 | 1.237293  |
| 40               | 1                | 0              | -3.122586               | -1.600929 | 2.313392  |

|    |   |   |           |           |           |
|----|---|---|-----------|-----------|-----------|
| 41 | 1 | 0 | -4.032334 | -2.487398 | 1.074232  |
| 42 | 1 | 0 | -2.292424 | -2.214509 | 0.869535  |
| 43 | 6 | 0 | -4.866305 | 0.088988  | 1.018154  |
| 44 | 1 | 0 | -5.677628 | -0.546914 | 0.648415  |
| 45 | 1 | 0 | -4.902268 | 0.089265  | 2.110949  |
| 46 | 1 | 0 | -5.030755 | 1.110638  | 0.673113  |
| 47 | 6 | 0 | -4.088229 | 0.619309  | -1.717740 |
| 48 | 1 | 0 | -3.756129 | 0.647111  | -2.758266 |
| 49 | 1 | 0 | -5.171494 | 0.467356  | -1.697936 |
| 50 | 1 | 0 | -3.858647 | 1.585239  | -1.258972 |
| 51 | 6 | 0 | 1.988777  | -2.154257 | 1.743970  |
| 52 | 1 | 0 | 2.848158  | -2.693637 | 2.128043  |
| 53 | 6 | 0 | 2.632078  | -2.860653 | -0.584355 |
| 54 | 9 | 0 | 3.551143  | -2.014710 | -1.074811 |
| 55 | 9 | 0 | 1.960980  | -3.363606 | -1.625145 |
| 56 | 9 | 0 | 3.295035  | -3.863343 | 0.007266  |

---

### IntE1

|                                              |              |
|----------------------------------------------|--------------|
| Thermal correction to Energy=                | 0.492584     |
| Thermal correction to Enthalpy=              | 0.493529     |
| Thermal correction to Gibbs Free Energy=     | 0.404219     |
| Sum of electronic and zero-point Energies=   | -1406.882947 |
| Sum of electronic and thermal Energies=      | -1406.854579 |
| Sum of electronic and thermal Enthalpies=    | -1406.853635 |
| Sum of electronic and thermal Free Energies= | -1406.942945 |

Esol = -1407.8679698

---

| Center<br>Number | Atomic<br>Number | Atomic<br>Type | Coordinates (Angstroms) |          |           |
|------------------|------------------|----------------|-------------------------|----------|-----------|
|                  |                  |                | X                       | Y        | Z         |
| 1                | 6                | 0              | -0.046711               | 2.949757 | -0.757436 |
| 2                | 6                | 0              | -0.116208               | 3.005101 | 0.801090  |
| 3                | 5                | 0              | 0.357546                | 0.852121 | 0.109341  |
| 4                | 8                | 0              | -0.186835               | 1.554446 | -1.025688 |
| 5                | 8                | 0              | 0.553126                | 1.800510 | 1.175344  |
| 6                | 6                | 0              | 0.619686                | 4.182086 | 1.426800  |
| 7                | 1                | 0              | 0.220643                | 5.133666 | 1.059439  |
| 8                | 1                | 0              | 0.498471                | 4.156985 | 2.513451  |
| 9                | 1                | 0              | 1.686157                | 4.133575 | 1.201904  |
| 10               | 6                | 0              | 1.321351                | 3.387431 | -1.286093 |
| 11               | 1                | 0              | 1.381969                | 3.125881 | -2.345409 |



|    |   |   |           |           |           |
|----|---|---|-----------|-----------|-----------|
| 12 | 1 | 0 | 1.476739  | 4.465502  | -1.180599 |
| 13 | 1 | 0 | 2.119474  | 2.854517  | -0.761128 |
| 14 | 6 | 0 | -1.156665 | 3.709109  | -1.470100 |
| 15 | 1 | 0 | -1.129904 | 4.772820  | -1.210882 |
| 16 | 1 | 0 | -1.026416 | 3.617893  | -2.551747 |
| 17 | 1 | 0 | -2.139207 | 3.309192  | -1.210615 |
| 18 | 6 | 0 | -1.557695 | 2.962230  | 1.319608  |
| 19 | 1 | 0 | -1.537107 | 2.731638  | 2.388601  |
| 20 | 1 | 0 | -2.066228 | 3.921125  | 1.180223  |
| 21 | 1 | 0 | -2.140977 | 2.189582  | 0.810699  |
| 22 | 6 | 0 | 3.656714  | -1.119247 | -0.812013 |
| 23 | 6 | 0 | 3.128774  | -1.932140 | 0.410622  |
| 24 | 5 | 0 | 1.689132  | -0.225306 | -0.079564 |
| 25 | 8 | 0 | 2.851774  | 0.073250  | -0.756496 |
| 26 | 8 | 0 | 1.762029  | -1.482265 | 0.505618  |
| 27 | 6 | 0 | 3.147293  | -3.442038 | 0.232550  |
| 28 | 1 | 0 | 4.169782  | -3.797745 | 0.069016  |
| 29 | 1 | 0 | 2.759136  | -3.922510 | 1.134444  |
| 30 | 1 | 0 | 2.528551  | -3.749343 | -0.611823 |
| 31 | 6 | 0 | 3.356111  | -1.798070 | -2.147922 |
| 32 | 1 | 0 | 3.549758  | -1.085193 | -2.952587 |
| 33 | 1 | 0 | 3.982262  | -2.681562 | -2.302336 |
| 34 | 1 | 0 | 2.305265  | -2.096229 | -2.202466 |
| 35 | 6 | 0 | 5.125293  | -0.731756 | -0.736279 |
| 36 | 1 | 0 | 5.758061  | -1.624038 | -0.686015 |
| 37 | 1 | 0 | 5.399180  | -0.167279 | -1.630976 |
| 38 | 1 | 0 | 5.325309  | -0.106338 | 0.134948  |
| 39 | 6 | 0 | 3.815518  | -1.542218 | 1.719184  |
| 40 | 1 | 0 | 3.264358  | -1.987271 | 2.551537  |
| 41 | 1 | 0 | 4.848472  | -1.899619 | 1.755168  |
| 42 | 1 | 0 | 3.812708  | -0.456006 | 1.846890  |
| 43 | 6 | 0 | -1.948058 | -0.449925 | -0.208062 |
| 44 | 6 | 0 | -2.952094 | -1.326022 | 0.177970  |
| 45 | 6 | 0 | -1.827628 | -1.618255 | 2.271745  |
| 46 | 6 | 0 | -0.855613 | -0.736843 | 1.819619  |
| 47 | 1 | 0 | -1.925342 | 0.063702  | -1.164566 |
| 48 | 1 | 0 | -1.743494 | -2.058971 | 3.257281  |
| 49 | 7 | 0 | -0.930471 | -0.176154 | 0.609699  |
| 50 | 1 | 0 | 0.010732  | -0.450357 | 2.406207  |
| 51 | 6 | 0 | -2.894247 | -1.921098 | 1.434677  |
| 52 | 1 | 0 | -3.670276 | -2.614422 | 1.742108  |
| 53 | 6 | 0 | -4.117720 | -1.588286 | -0.733857 |
| 54 | 9 | 0 | -5.149547 | -0.782995 | -0.449304 |
| 55 | 9 | 0 | -3.793115 | -1.389057 | -2.014743 |

56            9            0            -4.553731    -2.848684    -0.604885

---

## TSE2

Thermal correction to Energy=            0.596917  
Thermal correction to Enthalpy=        0.597861  
Thermal correction to Gibbs Free Energy= 0.489033  
Sum of electronic and zero-point Energies= -1991.915921  
Sum of electronic and thermal Energies= -1991.879134  
Sum of electronic and thermal Enthalpies= -1991.878190  
Sum of electronic and thermal Free Energies= -1991.987018

Esol =-1993.2215842

---

| Center<br>Number | Atomic<br>Number | Atomic<br>Type | Coordinates (Angstroms) |           |           |
|------------------|------------------|----------------|-------------------------|-----------|-----------|
|                  |                  |                | X                       | Y         | Z         |
| 1                | 6                | 0              | 3.169950                | -1.446624 | -1.157253 |
| 2                | 6                | 0              | 1.261868                | -2.368321 | -2.273385 |
| 3                | 6                | 0              | 2.331432                | -0.994464 | -0.152826 |
| 4                | 6                | 0              | 0.479181                | -1.889975 | -1.228205 |
| 5                | 1                | 0              | 0.800558                | -2.905544 | -3.093173 |
| 6                | 1                | 0              | 2.679399                | -0.435070 | 0.708691  |
| 7                | 1                | 0              | -0.597209               | -2.025357 | -1.164203 |
| 8                | 7                | 0              | 1.015625                | -1.218916 | -0.206609 |
| 9                | 6                | 0              | 1.635846                | 3.005577  | 0.340171  |
| 10               | 6                | 0              | 0.265090                | 3.483849  | 0.917019  |
| 11               | 5                | 0              | 0.201829                | 1.227458  | 0.530200  |
| 12               | 8                | 0              | 1.316626                | 1.710794  | -0.191176 |
| 13               | 8                | 0              | -0.348347               | 2.246236  | 1.306768  |
| 14               | 6                | 0              | 0.373673                | 4.378737  | 2.143457  |
| 15               | 1                | 0              | 0.940886                | 5.287139  | 1.914014  |
| 16               | 1                | 0              | -0.627234               | 4.673506  | 2.469513  |
| 17               | 1                | 0              | 0.859308                | 3.855183  | 2.968313  |
| 18               | 6                | 0              | 2.684675                | 2.779171  | 1.431296  |
| 19               | 1                | 0              | 3.537164                | 2.255221  | 0.988595  |
| 20               | 1                | 0              | 3.040421                | 3.718365  | 1.864655  |
| 21               | 1                | 0              | 2.270621                | 2.152605  | 2.227899  |
| 22               | 6                | 0              | 2.203573                | 3.880038  | -0.767245 |
| 23               | 1                | 0              | 2.385093                | 4.897066  | -0.404306 |
| 24               | 1                | 0              | 3.155529                | 3.465298  | -1.109837 |
| 25               | 1                | 0              | 1.523708                | 3.928547  | -1.620088 |
| 26               | 6                | 0              | -0.618407               | 4.150676  | -0.138007 |

|    |   |   |           |           |           |
|----|---|---|-----------|-----------|-----------|
| 27 | 1 | 0 | -1.631216 | 4.240135  | 0.263983  |
| 28 | 1 | 0 | -0.253614 | 5.150878  | -0.390804 |
| 29 | 1 | 0 | -0.664794 | 3.549410  | -1.048469 |
| 30 | 6 | 0 | -0.147109 | -1.813101 | 2.815215  |
| 31 | 6 | 0 | -1.556369 | -1.603682 | 2.176092  |
| 32 | 5 | 0 | 0.033977  | -0.438270 | 0.964505  |
| 33 | 8 | 0 | 0.603066  | -0.738061 | 2.252070  |
| 34 | 8 | 0 | -1.235674 | -1.132223 | 0.866935  |
| 35 | 6 | 0 | -2.402090 | -2.863115 | 2.052778  |
| 36 | 1 | 0 | -2.623801 | -3.284788 | 3.038761  |
| 37 | 1 | 0 | -3.347734 | -2.614689 | 1.563350  |
| 38 | 1 | 0 | -1.896612 | -3.622033 | 1.451800  |
| 39 | 6 | 0 | 0.485455  | -3.143867 | 2.394304  |
| 40 | 1 | 0 | 1.549810  | -3.117986 | 2.644480  |
| 41 | 1 | 0 | 0.026693  | -3.992312 | 2.911422  |
| 42 | 1 | 0 | 0.387797  | -3.305440 | 1.316838  |
| 43 | 6 | 0 | -0.115027 | -1.683338 | 4.331824  |
| 44 | 1 | 0 | -0.790834 | -2.405497 | 4.802642  |
| 45 | 1 | 0 | 0.898220  | -1.874496 | 4.696144  |
| 46 | 1 | 0 | -0.401324 | -0.675581 | 4.636601  |
| 47 | 6 | 0 | -2.349630 | -0.500091 | 2.881410  |
| 48 | 1 | 0 | -3.247538 | -0.290144 | 2.292236  |
| 49 | 1 | 0 | -2.663338 | -0.795874 | 3.886954  |
| 50 | 1 | 0 | -1.750800 | 0.414370  | 2.944074  |
| 51 | 6 | 0 | -0.749870 | 0.831170  | -2.366396 |
| 52 | 6 | 0 | -1.526050 | 0.203903  | -3.337025 |
| 53 | 6 | 0 | -3.275884 | 0.071450  | -1.710543 |
| 54 | 6 | 0 | -2.435971 | 0.715211  | -0.807387 |
| 55 | 1 | 0 | 0.278190  | 1.139754  | -2.550189 |
| 56 | 1 | 0 | -1.125646 | 0.020302  | -4.327395 |
| 57 | 7 | 0 | -1.199882 | 1.079295  | -1.136277 |
| 58 | 1 | 0 | -2.738034 | 0.920582  | 0.215484  |
| 59 | 6 | 0 | 2.630795  | -2.140049 | -2.239154 |
| 60 | 6 | 0 | -2.816265 | -0.190217 | -2.996779 |
| 61 | 1 | 0 | -3.456072 | -0.701090 | -3.708609 |
| 62 | 1 | 0 | 3.278339  | -2.484240 | -3.039231 |
| 63 | 6 | 0 | -4.660077 | -0.317064 | -1.280349 |
| 64 | 6 | 0 | 4.651518  | -1.212755 | -1.071078 |
| 65 | 9 | 0 | -4.670920 | -0.766930 | -0.017762 |
| 66 | 9 | 0 | -5.505693 | 0.721627  | -1.332855 |
| 67 | 9 | 0 | -5.165215 | -1.280754 | -2.063830 |
| 68 | 9 | 0 | 5.293747  | -2.304009 | -0.633830 |
| 69 | 9 | 0 | 4.945066  | -0.210222 | -0.237277 |
| 70 | 9 | 0 | 5.159415  | -0.915213 | -2.275318 |

---

**IntE2**

|                                              |              |
|----------------------------------------------|--------------|
| Thermal correction to Energy=                | 0.598044     |
| Thermal correction to Enthalpy=              | 0.598988     |
| Thermal correction to Gibbs Free Energy=     | 0.492476     |
| Sum of electronic and zero-point Energies=   | -1991.918498 |
| Sum of electronic and thermal Energies=      | -1991.881774 |
| Sum of electronic and thermal Enthalpies=    | -1991.880829 |
| Sum of electronic and thermal Free Energies= | -1991.987341 |

Esol = -1993.2241875

---

| Center<br>Number | Atomic<br>Number | Atomic<br>Type | Coordinates (Angstroms) |           |           |
|------------------|------------------|----------------|-------------------------|-----------|-----------|
|                  |                  |                | X                       | Y         | Z         |
| 1                | 6                | 0              | 3.290372                | -0.735631 | -1.524745 |
| 2                | 6                | 0              | 1.536176                | -1.388514 | -3.015340 |
| 3                | 6                | 0              | 2.391460                | -0.820198 | -0.472727 |
| 4                | 6                | 0              | 0.686910                | -1.448577 | -1.919597 |
| 5                | 1                | 0              | 1.162338                | -1.629010 | -4.003269 |
| 6                | 1                | 0              | 2.653925                | -0.607553 | 0.558678  |
| 7                | 1                | 0              | -0.361764               | -1.726675 | -1.977000 |
| 8                | 7                | 0              | 1.117325                | -1.161624 | -0.683409 |
| 9                | 6                | 0              | 1.476434                | 2.451400  | 1.344043  |
| 10               | 6                | 0              | 0.070118                | 2.713855  | 1.970436  |
| 11               | 5                | 0              | -0.034809               | 0.878059  | 0.578138  |
| 12               | 8                | 0              | 1.165313                | 1.619364  | 0.224816  |
| 13               | 8                | 0              | -0.586796               | 1.462992  | 1.770366  |
| 14               | 6                | 0              | 0.087181                | 3.019068  | 3.461495  |
| 15               | 1                | 0              | 0.703890                | 3.898407  | 3.676833  |
| 16               | 1                | 0              | -0.930514               | 3.221861  | 3.806659  |
| 17               | 1                | 0              | 0.472220                | 2.166036  | 4.022429  |
| 18               | 6                | 0              | 2.377085                | 1.645905  | 2.285065  |
| 19               | 1                | 0              | 3.276630                | 1.351643  | 1.734895  |
| 20               | 1                | 0              | 2.689547                | 2.229655  | 3.156041  |
| 21               | 1                | 0              | 1.855669                | 0.743562  | 2.623675  |
| 22               | 6                | 0              | 2.205190                | 3.692376  | 0.849622  |
| 23               | 1                | 0              | 2.405860                | 4.384459  | 1.674177  |
| 24               | 1                | 0              | 3.161857                | 3.396771  | 0.408987  |
| 25               | 1                | 0              | 1.624796                | 4.213784  | 0.085659  |
| 26               | 6                | 0              | -0.694683               | 3.809054  | 1.219851  |
| 27               | 1                | 0              | -1.745673               | 3.768305  | 1.519447  |

|    |   |   |           |           |           |
|----|---|---|-----------|-----------|-----------|
| 28 | 1 | 0 | -0.305434 | 4.805920  | 1.449126  |
| 29 | 1 | 0 | -0.637244 | 3.657520  | 0.137848  |
| 30 | 6 | 0 | -0.070180 | -2.713571 | 1.970793  |
| 31 | 6 | 0 | -1.476474 | -2.451178 | 1.344327  |
| 32 | 5 | 0 | 0.034807  | -0.877961 | 0.578257  |
| 33 | 8 | 0 | 0.586757  | -1.462744 | 1.770570  |
| 34 | 8 | 0 | -1.165314 | -1.619292 | 0.224999  |
| 35 | 6 | 0 | -2.205238 | -3.692209 | 0.850057  |
| 36 | 1 | 0 | -2.405928 | -4.384181 | 1.674700  |
| 37 | 1 | 0 | -3.161895 | -3.396653 | 0.409368  |
| 38 | 1 | 0 | -1.624838 | -4.213727 | 0.086172  |
| 39 | 6 | 0 | 0.694632  | -3.808884 | 1.220387  |
| 40 | 1 | 0 | 1.745614  | -3.768099 | 1.520007  |
| 41 | 1 | 0 | 0.305369  | -4.805715 | 1.449793  |
| 42 | 1 | 0 | 0.637226  | -3.657505 | 0.138362  |
| 43 | 6 | 0 | -0.087293 | -3.018574 | 3.461895  |
| 44 | 1 | 0 | -0.704022 | -3.897874 | 3.677335  |
| 45 | 1 | 0 | 0.930388  | -3.221335 | 3.807119  |
| 46 | 1 | 0 | -0.472338 | -2.165458 | 4.022697  |
| 47 | 6 | 0 | -2.377136 | -1.645535 | 2.285210  |
| 48 | 1 | 0 | -3.276656 | -1.351332 | 1.734966  |
| 49 | 1 | 0 | -2.689634 | -2.229154 | 3.156260  |
| 50 | 1 | 0 | -1.855711 | -0.743154 | 2.623705  |
| 51 | 6 | 0 | -0.686855 | 1.448270  | -1.919795 |
| 52 | 6 | 0 | -1.536099 | 1.388026  | -3.015544 |
| 53 | 6 | 0 | -3.290327 | 0.735399  | -1.524876 |
| 54 | 6 | 0 | -2.391437 | 0.820141  | -0.472852 |
| 55 | 1 | 0 | 0.361819  | 1.726360  | -1.977225 |
| 56 | 1 | 0 | -1.162240 | 1.628359  | -4.003504 |
| 57 | 7 | 0 | -1.117296 | 1.161528  | -0.683566 |
| 58 | 1 | 0 | -2.653926 | 0.607688  | 0.558588  |
| 59 | 6 | 0 | 2.862891  | -1.016983 | -2.817542 |
| 60 | 6 | 0 | -2.862820 | 1.016533  | -2.817710 |
| 61 | 1 | 0 | -3.557708 | 0.942936  | -3.646713 |
| 62 | 1 | 0 | 3.557794  | -0.943517 | -3.646544 |
| 63 | 6 | 0 | -4.704492 | 0.326091  | -1.223159 |
| 64 | 6 | 0 | 4.704531  | -0.326276 | -1.223069 |
| 65 | 9 | 0 | -4.738948 | -0.828939 | -0.545869 |
| 66 | 9 | 0 | -5.326541 | 1.241559  | -0.470624 |
| 67 | 9 | 0 | -5.418970 | 0.165513  | -2.344492 |
| 68 | 9 | 0 | 5.326659  | -1.241758 | -0.470617 |
| 69 | 9 | 0 | 4.738966  | 0.828722  | -0.545723 |
| 70 | 9 | 0 | 5.418949  | -0.165610 | -2.344428 |

**TSE3**

|                                              |              |
|----------------------------------------------|--------------|
| Thermal correction to Energy=                | 0.596889     |
| Thermal correction to Enthalpy=              | 0.597833     |
| Thermal correction to Gibbs Free Energy=     | 0.494095     |
| Sum of electronic and zero-point Energies=   | -1991.908550 |
| Sum of electronic and thermal Energies=      | -1991.872575 |
| Sum of electronic and thermal Enthalpies=    | -1991.871631 |
| Sum of electronic and thermal Free Energies= | -1991.975369 |

Esol =-1993.2123281

---

| Center<br>Number | Atomic<br>Number | Atomic<br>Type | Coordinates (Angstroms) |           |           |
|------------------|------------------|----------------|-------------------------|-----------|-----------|
|                  |                  |                | X                       | Y         | Z         |
| 1                | 6                | 0              | 3.150820                | -1.619454 | 0.684384  |
| 2                | 6                | 0              | 1.338540                | -3.117315 | 1.096734  |
| 3                | 6                | 0              | 2.309737                | -0.556313 | 0.845077  |
| 4                | 6                | 0              | 0.497012                | -2.013545 | 1.226356  |
| 5                | 1                | 0              | 0.912801                | -4.106983 | 1.220512  |
| 6                | 1                | 0              | 2.628508                | 0.475970  | 0.786484  |
| 7                | 1                | 0              | -0.541766               | -2.085612 | 1.527560  |
| 8                | 7                | 0              | 0.977619                | -0.742161 | 1.109221  |
| 9                | 6                | 0              | 1.574120                | 1.489548  | -2.275953 |
| 10               | 6                | 0              | 0.180607                | 2.167649  | -2.499994 |
| 11               | 5                | 0              | -0.042906               | 0.436455  | -1.048399 |
| 12               | 8                | 0              | 1.216846                | 0.240954  | -1.654793 |
| 13               | 8                | 0              | -0.583250               | 1.699918  | -1.376065 |
| 14               | 6                | 0              | 0.203956                | 3.686820  | -2.471581 |
| 15               | 1                | 0              | 0.870315                | 4.080783  | -3.246019 |
| 16               | 1                | 0              | -0.802216               | 4.072745  | -2.656080 |
| 17               | 1                | 0              | 0.537978                | 4.047870  | -1.497289 |
| 18               | 6                | 0              | 2.455973                | 2.272879  | -1.305223 |
| 19               | 1                | 0              | 3.329540                | 1.661889  | -1.058644 |
| 20               | 1                | 0              | 2.810686                | 3.205181  | -1.754707 |
| 21               | 1                | 0              | 1.909496                | 2.501298  | -0.384847 |
| 22               | 6                | 0              | 2.341164                | 1.188256  | -3.555055 |
| 23               | 1                | 0              | 2.545721                | 2.111213  | -4.107655 |
| 24               | 1                | 0              | 3.297306                | 0.721251  | -3.304205 |
| 25               | 1                | 0              | 1.785621                | 0.505393  | -4.199783 |
| 26               | 6                | 0              | -0.512876               | 1.660941  | -3.765846 |
| 27               | 1                | 0              | -1.551343               | 2.001560  | -3.755513 |
| 28               | 1                | 0              | -0.031127               | 2.036200  | -4.673448 |

|    |   |   |           |           |           |
|----|---|---|-----------|-----------|-----------|
| 29 | 1 | 0 | -0.509813 | 0.566570  | -3.796787 |
| 30 | 6 | 0 | -0.180609 | 2.167617  | 2.500018  |
| 31 | 6 | 0 | -1.574122 | 1.489518  | 2.275969  |
| 32 | 5 | 0 | 0.042905  | 0.436442  | 1.048402  |
| 33 | 8 | 0 | 0.583247  | 1.699902  | 1.376082  |
| 34 | 8 | 0 | -1.216847 | 0.240932  | 1.654794  |
| 35 | 6 | 0 | -2.341165 | 1.188213  | 3.555068  |
| 36 | 1 | 0 | -2.545719 | 2.111163  | 4.107679  |
| 37 | 1 | 0 | -3.297309 | 0.721214  | 3.304213  |
| 38 | 1 | 0 | -1.785624 | 0.505340  | 4.199787  |
| 39 | 6 | 0 | 0.512875  | 1.660892  | 3.765863  |
| 40 | 1 | 0 | 1.551348  | 2.001492  | 3.755521  |
| 41 | 1 | 0 | 0.031141  | 2.036157  | 4.673470  |
| 42 | 1 | 0 | 0.509793  | 0.566521  | 3.796801  |
| 43 | 6 | 0 | -0.203962 | 3.686789  | 2.471627  |
| 44 | 1 | 0 | -0.870338 | 4.080738  | 3.246057  |
| 45 | 1 | 0 | 0.802204  | 4.072716  | 2.656150  |
| 46 | 1 | 0 | -0.537968 | 4.047849  | 1.497333  |
| 47 | 6 | 0 | -2.455975 | 2.272861  | 1.305248  |
| 48 | 1 | 0 | -3.329541 | 1.661873  | 1.058662  |
| 49 | 1 | 0 | -2.810688 | 3.205157  | 1.754743  |
| 50 | 1 | 0 | -1.909497 | 2.501292  | 0.384875  |
| 51 | 6 | 0 | -0.497011 | -2.013530 | -1.226385 |
| 52 | 6 | 0 | -1.338537 | -3.117302 | -1.096772 |
| 53 | 6 | 0 | -3.150818 | -1.619448 | -0.684403 |
| 54 | 6 | 0 | -2.309737 | -0.556305 | -0.845087 |
| 55 | 1 | 0 | 0.541766  | -2.085591 | -1.527594 |
| 56 | 1 | 0 | -0.912796 | -4.106968 | -1.220561 |
| 57 | 7 | 0 | -0.977619 | -0.742147 | -1.109234 |
| 58 | 1 | 0 | -2.628509 | 0.475978  | -0.786483 |
| 59 | 6 | 0 | 2.675674  | -2.943347 | 0.804410  |
| 60 | 6 | 0 | -2.675671 | -2.943339 | -0.804443 |
| 61 | 6 | 0 | -4.609672 | -1.383136 | -0.432291 |
| 62 | 6 | 0 | 4.609674  | -1.383139 | 0.432279  |
| 63 | 9 | 0 | 5.054976  | -2.154292 | -0.570397 |
| 64 | 9 | 0 | 5.349206  | -1.685215 | 1.509915  |
| 65 | 9 | 0 | 4.869527  | -0.107632 | 0.113643  |
| 66 | 9 | 0 | -5.349208 | -1.685202 | -1.509927 |
| 67 | 9 | 0 | -5.054969 | -2.154300 | 0.570379  |
| 68 | 9 | 0 | -4.869525 | -0.107633 | -0.113640 |
| 69 | 1 | 0 | -3.349017 | -3.782308 | -0.674444 |
| 70 | 1 | 0 | 3.349023  | -3.782314 | 0.674403  |

---

**IntE3**

Thermal correction to Energy= 0.601770  
 Thermal correction to Enthalpy= 0.602714  
 Thermal correction to Gibbs Free Energy= 0.498745  
 Sum of electronic and zero-point Energies= -1991.985228  
 Sum of electronic and thermal Energies= -1991.949340  
 Sum of electronic and thermal Enthalpies= -1991.948395  
 Sum of electronic and thermal Free Energies= -1992.052364

Esol = -1993.2991471

---

| Center<br>Number | Atomic<br>Number | Atomic<br>Type | Coordinates (Angstroms) |           |           |
|------------------|------------------|----------------|-------------------------|-----------|-----------|
|                  |                  |                | X                       | Y         | Z         |
| 1                | 6                | 0              | -1.118238               | 2.910999  | 0.017628  |
| 2                | 6                | 0              | -2.268681               | 0.929472  | -0.753909 |
| 3                | 6                | 0              | 0.079281                | 2.346846  | -0.240472 |
| 4                | 6                | 0              | -0.982838               | 0.176655  | -0.525770 |
| 5                | 1                | 0              | -3.127459               | 0.397746  | -1.147755 |
| 6                | 1                | 0              | 1.014232                | 2.885145  | -0.136696 |
| 7                | 1                | 0              | -0.876854               | -0.664746 | -1.216900 |
| 8                | 7                | 0              | 0.170814                | 1.060780  | -0.723811 |
| 9                | 6                | 0              | 2.330505                | 1.546613  | 3.000815  |
| 10               | 6                | 0              | 3.246139                | 0.273420  | 3.025858  |
| 11               | 5                | 0              | 1.338665                | -0.167599 | 1.912315  |
| 12               | 8                | 0              | 1.062667                | 1.009192  | 2.552796  |
| 13               | 8                | 0              | 2.654581                | -0.557747 | 1.999973  |
| 14               | 6                | 0              | 4.700064                | 0.525769  | 2.666465  |
| 15               | 1                | 0              | 5.161153                | 1.206941  | 3.388494  |
| 16               | 1                | 0              | 5.249193                | -0.419006 | 2.686812  |
| 17               | 1                | 0              | 4.789368                | 0.958153  | 1.668642  |
| 18               | 6                | 0              | 2.779799                | 2.579921  | 1.972992  |
| 19               | 1                | 0              | 2.003707                | 3.345070  | 1.885545  |
| 20               | 1                | 0              | 3.708049                | 3.065959  | 2.286868  |
| 21               | 1                | 0              | 2.935722                | 2.121134  | 0.990707  |
| 22               | 6                | 0              | 2.121688                | 2.205238  | 4.354869  |
| 23               | 1                | 0              | 3.076519                | 2.552185  | 4.762478  |
| 24               | 1                | 0              | 1.464557                | 3.070111  | 4.237486  |
| 25               | 1                | 0              | 1.660633                | 1.519135  | 5.066398  |
| 26               | 6                | 0              | 3.144324                | -0.506122 | 4.334992  |
| 27               | 1                | 0              | 3.641396                | -1.470864 | 4.209678  |
| 28               | 1                | 0              | 3.622622                | 0.030421  | 5.158607  |
| 29               | 1                | 0              | 2.098787                | -0.691720 | 4.598329  |
| 30               | 6                | 0              | 3.448062                | 0.627189  | -2.198073 |



|    |   |   |           |           |           |
|----|---|---|-----------|-----------|-----------|
| 31 | 6 | 0 | 2.872849  | -0.830566 | -2.269721 |
| 32 | 5 | 0 | 1.388863  | 0.561849  | -1.287800 |
| 33 | 8 | 0 | 2.570290  | 1.263874  | -1.239907 |
| 34 | 8 | 0 | 1.474714  | -0.629187 | -1.955640 |
| 35 | 6 | 0 | 2.969901  | -1.483318 | -3.638898 |
| 36 | 1 | 0 | 4.016473  | -1.570489 | -3.947666 |
| 37 | 1 | 0 | 2.541596  | -2.487280 | -3.591134 |
| 38 | 1 | 0 | 2.424680  | -0.913986 | -4.392891 |
| 39 | 6 | 0 | 3.293034  | 1.391484  | -3.510708 |
| 40 | 1 | 0 | 3.522699  | 2.444853  | -3.334424 |
| 41 | 1 | 0 | 3.970514  | 1.008469  | -4.278324 |
| 42 | 1 | 0 | 2.266923  | 1.322752  | -3.883989 |
| 43 | 6 | 0 | 4.875962  | 0.723332  | -1.689163 |
| 44 | 1 | 0 | 5.556742  | 0.187653  | -2.358339 |
| 45 | 1 | 0 | 5.181985  | 1.772214  | -1.656620 |
| 46 | 1 | 0 | 4.967394  | 0.303099  | -0.685899 |
| 47 | 6 | 0 | 3.454588  | -1.749702 | -1.200546 |
| 48 | 1 | 0 | 2.878468  | -2.678961 | -1.185707 |
| 49 | 1 | 0 | 4.498026  | -1.994603 | -1.418892 |
| 50 | 1 | 0 | 3.401050  | -1.286417 | -0.209515 |
| 51 | 6 | 0 | -0.974673 | -0.399532 | 0.928022  |
| 52 | 6 | 0 | -2.036634 | -1.462829 | 1.046615  |
| 53 | 6 | 0 | -0.345256 | -3.075156 | 0.426208  |
| 54 | 6 | 0 | 0.634831  | -2.220920 | 0.785591  |
| 55 | 1 | 0 | -1.154974 | 0.433794  | 1.613767  |
| 56 | 1 | 0 | -3.037248 | -1.174356 | 1.347782  |
| 57 | 7 | 0 | 0.345747  | -0.955844 | 1.245239  |
| 58 | 1 | 0 | 1.681516  | -2.501233 | 0.788894  |
| 59 | 6 | 0 | -2.332952 | 2.218260  | -0.396553 |
| 60 | 6 | 0 | -1.731693 | -2.721880 | 0.708385  |
| 61 | 1 | 0 | -3.251749 | 2.790628  | -0.483481 |
| 62 | 1 | 0 | -2.475285 | -3.513255 | 0.720878  |
| 63 | 6 | 0 | -0.020980 | -4.430588 | -0.086350 |
| 64 | 6 | 0 | -1.209105 | 4.291408  | 0.557032  |
| 65 | 9 | 0 | -0.522235 | -4.640570 | -1.317131 |
| 66 | 9 | 0 | -0.537336 | -5.398739 | 0.693704  |
| 67 | 9 | 0 | 1.305723  | -4.644468 | -0.160550 |
| 68 | 9 | 0 | -1.910994 | 4.338603  | 1.703914  |
| 69 | 9 | 0 | 0.001227  | 4.820886  | 0.812209  |
| 70 | 9 | 0 | -1.836366 | 5.124508  | -0.294494 |

---

**TSE4**

Thermal correction to Energy=

0.596749

Thermal correction to Enthalpy= 0.597693  
 Thermal correction to Gibbs Free Energy= 0.493471  
 Sum of electronic and zero-point Energies= -1991.928243  
 Sum of electronic and thermal Energies= -1991.891912  
 Sum of electronic and thermal Enthalpies= -1991.890968  
 Sum of electronic and thermal Free Energies= -1991.995191

Esol =-1993.2390427

| Center<br>Number | Atomic<br>Number | Atomic<br>Type | Coordinates (Angstroms) |           |           |
|------------------|------------------|----------------|-------------------------|-----------|-----------|
|                  |                  |                | X                       | Y         | Z         |
| 1                | 6                | 0              | 0.328785                | 2.117337  | -3.147297 |
| 2                | 6                | 0              | -0.647060               | 3.609766  | -1.544716 |
| 3                | 6                | 0              | -0.116654               | 1.051279  | -2.446423 |
| 4                | 6                | 0              | -1.005929               | 2.515044  | -0.766169 |
| 5                | 1                | 0              | -0.881091               | 4.596337  | -1.157677 |
| 6                | 1                | 0              | 0.024204                | 0.031457  | -2.775037 |
| 7                | 1                | 0              | -1.622955               | 2.589675  | 0.119853  |
| 8                | 7                | 0              | -0.834840               | 1.209105  | -1.262680 |
| 9                | 6                | 0              | 2.788370                | -1.129716 | -0.744433 |
| 10               | 6                | 0              | 2.435483                | -1.939875 | 0.554769  |
| 11               | 5                | 0              | 1.452432                | 0.080299  | 0.622156  |
| 12               | 8                | 0              | 2.331760                | 0.205476  | -0.418191 |
| 13               | 8                | 0              | 1.309361                | -1.205452 | 1.092219  |
| 14               | 6                | 0              | 2.009282                | -3.376728 | 0.310309  |
| 15               | 1                | 0              | 2.825859                | -3.945840 | -0.144945 |
| 16               | 1                | 0              | 1.753825                | -3.847302 | 1.263664  |
| 17               | 1                | 0              | 1.138559                | -3.423865 | -0.345675 |
| 18               | 6                | 0              | 2.011644                | -1.607107 | -1.965636 |
| 19               | 1                | 0              | 2.149510                | -0.886155 | -2.775076 |
| 20               | 1                | 0              | 2.378882                | -2.580497 | -2.303807 |
| 21               | 1                | 0              | 0.943902                | -1.692973 | -1.742515 |
| 22               | 6                | 0              | 4.274055                | -1.059385 | -1.061742 |
| 23               | 1                | 0              | 4.677083                | -2.062662 | -1.232354 |
| 24               | 1                | 0              | 4.419417                | -0.472887 | -1.972068 |
| 25               | 1                | 0              | 4.834466                | -0.584678 | -0.255084 |
| 26               | 6                | 0              | 3.537574                | -1.878312 | 1.609827  |
| 27               | 1                | 0              | 3.153984                | -2.292988 | 2.544900  |
| 28               | 1                | 0              | 4.415879                | -2.453366 | 1.305348  |
| 29               | 1                | 0              | 3.843672                | -0.844147 | 1.794225  |
| 30               | 6                | 0              | -2.432818               | -1.942232 | -0.555059 |
| 31               | 6                | 0              | -2.786654               | -1.132869 | 0.744437  |

|    |   |   |           |           |           |
|----|---|---|-----------|-----------|-----------|
| 32 | 5 | 0 | -1.451986 | 0.079092  | -0.621733 |
| 33 | 8 | 0 | -1.307745 | -1.206258 | -1.092497 |
| 34 | 8 | 0 | -2.331133 | 0.202864  | 0.418923  |
| 35 | 6 | 0 | -4.272489 | -1.063888 | 1.061399  |
| 36 | 1 | 0 | -4.674725 | -2.067533 | 1.231707  |
| 37 | 1 | 0 | -4.418549 | -0.477698 | 1.971812  |
| 38 | 1 | 0 | -4.833128 | -0.589480 | 0.254727  |
| 39 | 6 | 0 | -3.535062 | -1.881895 | -1.610030 |
| 40 | 1 | 0 | -3.151041 | -2.296037 | -2.545164 |
| 41 | 1 | 0 | -4.412682 | -2.457993 | -1.305556 |
| 42 | 1 | 0 | -3.842371 | -0.848072 | -1.794346 |
| 43 | 6 | 0 | -2.004650 | -3.378574 | -0.310996 |
| 44 | 1 | 0 | -2.820462 | -3.948975 | 0.144016  |
| 45 | 1 | 0 | -1.748458 | -3.848488 | -1.264479 |
| 46 | 1 | 0 | -1.133900 | -3.424689 | 0.345040  |
| 47 | 6 | 0 | -2.010002 | -1.610186 | 1.965718  |
| 48 | 1 | 0 | -2.149445 | -0.890200 | 2.775752  |
| 49 | 1 | 0 | -2.376166 | -2.584359 | 2.302801  |
| 50 | 1 | 0 | -0.941945 | -1.694400 | 1.743470  |
| 51 | 6 | 0 | 1.004015  | 2.515734  | 0.767305  |
| 52 | 6 | 0 | 0.644071  | 3.609878  | 1.546166  |
| 53 | 6 | 0 | -0.331170 | 2.116066  | 3.147799  |
| 54 | 6 | 0 | 0.115396  | 1.050618  | 2.446707  |
| 55 | 1 | 0 | 1.621130  | 2.591206  | -0.118581 |
| 56 | 1 | 0 | 0.877461  | 4.596779  | 1.159586  |
| 57 | 7 | 0 | 0.833980  | 1.209462  | 1.263342  |
| 58 | 1 | 0 | -0.024878 | 0.030583  | 2.774915  |
| 59 | 6 | 0 | 0.047547  | 3.460476  | -2.728159 |
| 60 | 6 | 0 | -0.050793 | 3.459584  | 2.729332  |
| 61 | 1 | 0 | 0.374759  | 4.303087  | -3.322854 |
| 62 | 1 | 0 | -0.378785 | 4.301706  | 3.324289  |
| 63 | 6 | 0 | 1.101293  | 1.903506  | -4.407395 |
| 64 | 6 | 0 | -1.104396 | 1.901180  | 4.407276  |
| 65 | 9 | 0 | 2.302577  | 2.500987  | -4.351152 |
| 66 | 9 | 0 | 0.467839  | 2.421781  | -5.471676 |
| 67 | 9 | 0 | 1.317083  | 0.601945  | -4.669021 |
| 68 | 9 | 0 | -2.306656 | 2.496593  | 4.349857  |
| 69 | 9 | 0 | -0.472755 | 2.420760  | 5.471998  |
| 70 | 9 | 0 | -1.318207 | 0.599306  | 4.668927  |

---

#### IntE4

Thermal correction to Energy=

0.296874

Thermal correction to Enthalpy=

0.297819

Thermal correction to Gibbs Free Energy= 0.232163  
 Sum of electronic and zero-point Energies= -995.957661  
 Sum of electronic and thermal Energies= -995.939692  
 Sum of electronic and thermal Enthalpies= -995.938748  
 Sum of electronic and thermal Free Energies= -996.004403

Esol =-996.6158257

| Center<br>Number | Atomic<br>Number | Atomic<br>Type | Coordinates (Angstroms) |           |           |
|------------------|------------------|----------------|-------------------------|-----------|-----------|
|                  |                  |                | X                       | Y         | Z         |
| 1                | 6                | 0              | 2.293789                | 1.191396  | -0.211213 |
| 2                | 6                | 0              | 3.655922                | 1.192909  | -0.202659 |
| 3                | 6                | 0              | 3.637039                | -1.178173 | 0.217817  |
| 4                | 6                | 0              | 2.279978                | -1.176975 | 0.206878  |
| 5                | 7                | 0              | 1.566259                | 0.003993  | -0.006640 |
| 6                | 1                | 0              | 1.688622                | 2.073798  | -0.369378 |
| 7                | 1                | 0              | 1.683762                | -2.066778 | 0.359129  |
| 8                | 5                | 0              | 0.131520                | 0.001105  | -0.007750 |
| 9                | 8                | 0              | -0.608671               | -1.125038 | 0.245336  |
| 10               | 8                | 0              | -0.614343               | 1.123851  | -0.258646 |
| 11               | 6                | 0              | -1.973665               | -0.781813 | -0.089329 |
| 12               | 6                | 0              | -1.975580               | 0.774681  | 0.086855  |
| 13               | 6                | 0              | -2.909841               | -1.529591 | 0.844059  |
| 14               | 1                | 0              | -3.945065               | -1.215102 | 0.678292  |
| 15               | 1                | 0              | -2.841917               | -2.602197 | 0.647083  |
| 16               | 1                | 0              | -2.650078               | -1.356003 | 1.889158  |
| 17               | 6                | 0              | -2.200523               | -1.209876 | -1.536782 |
| 18               | 1                | 0              | -1.976683               | -2.275218 | -1.627628 |
| 19               | 1                | 0              | -3.236253               | -1.042202 | -1.844082 |
| 20               | 1                | 0              | -1.540450               | -0.660405 | -2.214405 |
| 21               | 6                | 0              | -2.922615               | 1.519013  | -0.838370 |
| 22               | 1                | 0              | -3.956054               | 1.206398  | -0.658050 |
| 23               | 1                | 0              | -2.851588               | 2.592549  | -0.647335 |
| 24               | 1                | 0              | -2.676195               | 1.340311  | -1.885856 |
| 25               | 6                | 0              | -2.191411               | 1.202146  | 1.536499  |
| 26               | 1                | 0              | -1.973969               | 2.268993  | 1.624810  |
| 27               | 1                | 0              | -3.222664               | 1.027722  | 1.854966  |
| 28               | 1                | 0              | -1.520984               | 0.657079  | 2.207528  |
| 29               | 6                | 0              | 4.390014                | 0.008780  | 0.012522  |
| 30               | 1                | 0              | 5.471249                | -0.007912 | 0.023378  |
| 31               | 6                | 0              | 4.369987                | -2.461270 | 0.456860  |
| 32               | 9                | 0              | 5.145208                | -2.384066 | 1.550106  |

|    |   |   |          |           |           |
|----|---|---|----------|-----------|-----------|
| 33 | 9 | 0 | 3.543805 | -3.504685 | 0.625068  |
| 34 | 9 | 0 | 5.184770 | -2.756986 | -0.568654 |
| 35 | 1 | 0 | 4.167470 | 2.134946  | -0.366040 |

---

## F

|                                              |             |
|----------------------------------------------|-------------|
| Thermal correction to Energy=                | 0.093992    |
| Thermal correction to Enthalpy=              | 0.094936    |
| Thermal correction to Gibbs Free Energy=     | 0.062359    |
| Sum of electronic and zero-point Energies=   | -248.088268 |
| Sum of electronic and thermal Energies=      | -248.084021 |
| Sum of electronic and thermal Enthalpies=    | -248.083077 |
| Sum of electronic and thermal Free Energies= | -248.115654 |

Esol = -248.2645764

---

| Center<br>Number | Atomic<br>Number | Atomic<br>Type | Coordinates (Angstroms) |           |           |
|------------------|------------------|----------------|-------------------------|-----------|-----------|
|                  |                  |                | X                       | Y         | Z         |
| 1                | 6                | 0              | 1.138278                | -0.720957 | -0.000006 |
| 2                | 6                | 0              | 1.195272                | 0.670695  | 0.000014  |
| 3                | 6                | 0              | -1.195272               | 0.670695  | -0.000014 |
| 4                | 6                | 0              | -1.138279               | -0.720957 | 0.000006  |
| 5                | 7                | 0              | 0.000000                | -1.416793 | 0.000000  |
| 6                | 1                | 0              | 2.055001                | -1.306471 | 0.000028  |
| 7                | 1                | 0              | 2.153520                | 1.178537  | 0.000036  |
| 8                | 1                | 0              | -2.153520               | 1.178538  | -0.000035 |
| 9                | 1                | 0              | -2.055002               | -1.306471 | -0.000027 |
| 10               | 6                | 0              | 0.000000                | 1.381087  | 0.000000  |
| 11               | 1                | 0              | 0.000000                | 2.466627  | 0.000000  |

---

## TSF1

|                                              |              |
|----------------------------------------------|--------------|
| Thermal correction to Energy=                | 0.482550     |
| Thermal correction to Enthalpy=              | 0.483495     |
| Thermal correction to Gibbs Free Energy=     | 0.406244     |
| Sum of electronic and zero-point Energies=   | -1069.951982 |
| Sum of electronic and thermal Energies=      | -1069.927816 |
| Sum of electronic and thermal Enthalpies=    | -1069.926871 |
| Sum of electronic and thermal Free Energies= | -1070.004121 |

Esol = -1070.7850194

---

| Center<br>Number | Atomic<br>Number | Atomic<br>Type | Coordinates (Angstroms) |           |           |
|------------------|------------------|----------------|-------------------------|-----------|-----------|
|                  |                  |                | X                       | Y         | Z         |
| 1                | 6                | 0              | 0.715874                | 3.241968  | -1.220328 |
| 2                | 6                | 0              | 0.470034                | 3.350368  | 1.167867  |
| 3                | 6                | 0              | 0.094058                | 1.999268  | -1.180823 |
| 4                | 1                | 0              | 1.045733                | 3.658480  | -2.165261 |
| 5                | 6                | 0              | -0.140946               | 2.101589  | 1.114475  |
| 6                | 1                | 0              | 0.605707                | 3.851387  | 2.119543  |
| 7                | 1                | 0              | -0.076941               | 1.396337  | -2.069985 |
| 8                | 1                | 0              | -0.495838               | 1.576742  | 1.998739  |
| 9                | 7                | 0              | -0.324617               | 1.457271  | -0.036718 |
| 10               | 6                | 0              | 2.885125                | -1.256209 | -0.711362 |
| 11               | 6                | 0              | 2.893164                | -0.720317 | 0.754458  |
| 12               | 5                | 0              | 0.749973                | -0.899644 | 0.007731  |
| 13               | 8                | 0              | 1.531419                | -0.991328 | -1.126586 |
| 14               | 8                | 0              | 1.521118                | -0.897247 | 1.153636  |
| 15               | 6                | 0              | 3.792992                | -1.483481 | 1.713282  |
| 16               | 1                | 0              | 4.837437                | -1.430136 | 1.388587  |
| 17               | 1                | 0              | 3.720020                | -1.041740 | 2.710387  |
| 18               | 1                | 0              | 3.497913                | -2.531441 | 1.783172  |
| 19               | 6                | 0              | 3.090803                | -2.767621 | -0.789806 |
| 20               | 1                | 0              | 2.865382                | -3.099547 | -1.806062 |
| 21               | 1                | 0              | 4.120480                | -3.046879 | -0.548099 |
| 22               | 1                | 0              | 2.414714                | -3.284833 | -0.103148 |
| 23               | 6                | 0              | 3.836638                | -0.542331 | -1.658989 |
| 24               | 1                | 0              | 4.872094                | -0.642717 | -1.317348 |
| 25               | 1                | 0              | 3.758959                | -0.984791 | -2.655369 |
| 26               | 1                | 0              | 3.591508                | 0.518674  | -1.736832 |
| 27               | 6                | 0              | 3.187060                | 0.777952  | 0.832474  |
| 28               | 1                | 0              | 2.969558                | 1.125239  | 1.846021  |
| 29               | 1                | 0              | 4.234181                | 0.996114  | 0.602820  |
| 30               | 1                | 0              | 2.552610                | 1.337125  | 0.136615  |
| 31               | 6                | 0              | -3.068704               | -0.449007 | -0.753472 |
| 32               | 6                | 0              | -3.052664               | -0.878846 | 0.749548  |
| 33               | 5                | 0              | -0.915436               | -0.560270 | -0.002364 |
| 34               | 8                | 0              | -1.707225               | -0.670140 | -1.149527 |
| 35               | 8                | 0              | -1.710345               | -0.577425 | 1.154627  |
| 36               | 6                | 0              | -4.025993               | -0.120050 | 1.639706  |
| 37               | 1                | 0              | -5.057105               | -0.262662 | 1.299203  |
| 38               | 1                | 0              | -3.949185               | -0.492835 | 2.664583  |
| 39               | 1                | 0              | -3.802133               | 0.948407  | 1.647303  |
| 40               | 6                | 0              | -3.397493               | 1.033591  | -0.938707 |
| 41               | 1                | 0              | -3.163662               | 1.316039  | -1.969286 |

|    |   |   |           |           |           |
|----|---|---|-----------|-----------|-----------|
| 42 | 1 | 0 | -4.457962 | 1.230944  | -0.755192 |
| 43 | 1 | 0 | -2.803885 | 1.658122  | -0.268158 |
| 44 | 6 | 0 | -3.974106 | -1.287036 | -1.645510 |
| 45 | 1 | 0 | -5.014314 | -1.228910 | -1.307674 |
| 46 | 1 | 0 | -3.925219 | -0.910137 | -2.670672 |
| 47 | 1 | 0 | -3.661631 | -2.332269 | -1.652770 |
| 48 | 6 | 0 | -3.244424 | -2.385704 | 0.927583  |
| 49 | 1 | 0 | -3.009103 | -2.646576 | 1.962284  |
| 50 | 1 | 0 | -4.271223 | -2.695734 | 0.711403  |
| 51 | 1 | 0 | -2.563852 | -2.937277 | 0.272704  |
| 52 | 6 | 0 | 0.904542  | 3.926704  | -0.021859 |
| 53 | 1 | 0 | 1.389896  | 4.897641  | -0.015741 |

### IntF1

|                                              |              |
|----------------------------------------------|--------------|
| Thermal correction to Energy=                | 0.483754     |
| Thermal correction to Enthalpy=              | 0.484698     |
| Thermal correction to Gibbs Free Energy=     | 0.405650     |
| Sum of electronic and zero-point Energies=   | -1069.954771 |
| Sum of electronic and thermal Energies=      | -1069.930152 |
| Sum of electronic and thermal Enthalpies=    | -1069.929208 |
| Sum of electronic and thermal Free Energies= | -1070.008256 |

Esol = -1070.789125

| Center<br>Number | Atomic<br>Number | Atomic<br>Type | Coordinates (Angstroms) |           |           |
|------------------|------------------|----------------|-------------------------|-----------|-----------|
|                  |                  |                | X                       | Y         | Z         |
| 1                | 6                | 0              | 2.518944                | -1.175916 | -1.307266 |
| 2                | 6                | 0              | 3.019643                | -1.568392 | 0.118901  |
| 3                | 5                | 0              | 0.964668                | -0.515966 | 0.266407  |
| 4                | 8                | 0              | 1.523721                | -0.193978 | -1.027149 |
| 5                | 8                | 0              | 1.820517                | -1.500781 | 0.887729  |
| 6                | 6                | 0              | 3.585442                | -2.978113 | 0.224664  |
| 7                | 1                | 0              | 4.430071                | -3.113990 | -0.459712 |
| 8                | 1                | 0              | 3.938017                | -3.159200 | 1.244179  |
| 9                | 1                | 0              | 2.818076                | -3.718485 | -0.007019 |
| 10               | 6                | 0              | 1.833748                | -2.347837 | -2.014523 |
| 11               | 1                | 0              | 1.314696                | -1.963029 | -2.896053 |
| 12               | 1                | 0              | 2.551036                | -3.110707 | -2.333113 |
| 13               | 1                | 0              | 1.088197                | -2.803678 | -1.356714 |
| 14               | 6                | 0              | 3.583428                | -0.565468 | -2.207892 |
| 15               | 1                | 0              | 4.408154                | -1.268249 | -2.368557 |

|    |   |   |           |           |           |
|----|---|---|-----------|-----------|-----------|
| 16 | 1 | 0 | 3.145613  | -0.324944 | -3.180701 |
| 17 | 1 | 0 | 3.984769  | 0.354730  | -1.777753 |
| 18 | 6 | 0 | 4.033465  | -0.561343 | 0.673690  |
| 19 | 1 | 0 | 4.141792  | -0.731791 | 1.748716  |
| 20 | 1 | 0 | 5.014880  | -0.674543 | 0.202387  |
| 21 | 1 | 0 | 3.695669  | 0.467729  | 0.520132  |
| 22 | 6 | 0 | -2.753007 | -1.805974 | -0.093644 |
| 23 | 6 | 0 | -2.743265 | -1.279638 | 1.375210  |
| 24 | 5 | 0 | -0.704299 | -0.927589 | 0.401298  |
| 25 | 8 | 0 | -1.351702 | -1.829128 | -0.419168 |
| 26 | 8 | 0 | -1.554450 | -0.465427 | 1.396845  |
| 27 | 6 | 0 | -3.941766 | -0.425435 | 1.757487  |
| 28 | 1 | 0 | -4.869641 | -0.999856 | 1.666423  |
| 29 | 1 | 0 | -3.842666 | -0.098525 | 2.795972  |
| 30 | 1 | 0 | -4.012725 | 0.461102  | 1.125495  |
| 31 | 6 | 0 | -3.419938 | -0.833287 | -1.065611 |
| 32 | 1 | 0 | -3.201482 | -1.155671 | -2.086337 |
| 33 | 1 | 0 | -4.505005 | -0.804766 | -0.929628 |
| 34 | 1 | 0 | -3.020533 | 0.176485  | -0.934494 |
| 35 | 6 | 0 | -3.327649 | -3.203018 | -0.268333 |
| 36 | 1 | 0 | -4.373558 | -3.234193 | 0.054971  |
| 37 | 1 | 0 | -3.286597 | -3.484280 | -1.323651 |
| 38 | 1 | 0 | -2.758869 | -3.938907 | 0.302090  |
| 39 | 6 | 0 | -2.536143 | -2.395030 | 2.399606  |
| 40 | 1 | 0 | -2.335022 | -1.943866 | 3.374683  |
| 41 | 1 | 0 | -3.420350 | -3.033084 | 2.486033  |
| 42 | 1 | 0 | -1.677983 | -3.014665 | 2.124207  |
| 43 | 6 | 0 | 1.371643  | 2.089019  | 0.570885  |
| 44 | 6 | 0 | 1.466872  | 3.263872  | 1.303567  |
| 45 | 6 | 0 | 1.077241  | 1.974817  | 3.291940  |
| 46 | 6 | 0 | 0.987141  | 0.845108  | 2.493668  |
| 47 | 1 | 0 | 1.494583  | 2.030203  | -0.505883 |
| 48 | 1 | 0 | 1.658849  | 4.201879  | 0.796470  |
| 49 | 1 | 0 | 0.958557  | 1.887944  | 4.365246  |
| 50 | 7 | 0 | 1.136208  | 0.916850  | 1.167637  |
| 51 | 1 | 0 | 0.797543  | -0.149306 | 2.883655  |
| 52 | 6 | 0 | 1.318654  | 3.204137  | 2.685619  |
| 53 | 1 | 0 | 1.389528  | 4.106350  | 3.284520  |

---

## TSF2

|                                          |          |
|------------------------------------------|----------|
| Thermal correction to Energy=            | 0.577961 |
| Thermal correction to Enthalpy=          | 0.578905 |
| Thermal correction to Gibbs Free Energy= | 0.492107 |



Sum of electronic and zero-point Energies= -1318.057248  
 Sum of electronic and thermal Energies= -1318.028435  
 Sum of electronic and thermal Enthalpies= -1318.027490  
 Sum of electronic and thermal Free Energies= -1318.114288

Esol = -1319.0609519

| Center<br>Number | Atomic<br>Number | Atomic<br>Type | Coordinates (Angstroms) |           |           |
|------------------|------------------|----------------|-------------------------|-----------|-----------|
|                  |                  |                | X                       | Y         | Z         |
| 1                | 6                | 0              | 0.900002                | 2.178595  | 3.025801  |
| 2                | 6                | 0              | 1.887354                | 3.209703  | 1.095347  |
| 3                | 6                | 0              | 0.767329                | 1.011946  | 2.287640  |
| 4                | 1                | 0              | 0.561913                | 2.206222  | 4.054738  |
| 5                | 6                | 0              | 1.730553                | 2.006005  | 0.422630  |
| 6                | 1                | 0              | 2.331880                | 4.056902  | 0.586419  |
| 7                | 1                | 0              | 0.318181                | 0.103671  | 2.674916  |
| 8                | 1                | 0              | 2.035569                | 1.841497  | -0.606602 |
| 9                | 7                | 0              | 1.178316                | 0.943509  | 1.016681  |
| 10               | 6                | 0              | -2.858886               | -1.078186 | 1.051959  |
| 11               | 6                | 0              | -2.904214               | -1.501047 | -0.449846 |
| 12               | 5                | 0              | -0.885423               | -0.521565 | 0.025223  |
| 13               | 8                | 0              | -1.752628               | -0.165673 | 1.086466  |
| 14               | 8                | 0              | -1.524001               | -1.426562 | -0.826027 |
| 15               | 6                | 0              | -3.398051               | -2.920407 | -0.692856 |
| 16               | 1                | 0              | -4.414724               | -3.052647 | -0.306829 |
| 17               | 1                | 0              | -3.410417               | -3.123268 | -1.767102 |
| 18               | 1                | 0              | -2.739928               | -3.649306 | -0.216970 |
| 19               | 6                | 0              | -2.495800               | -2.244253 | 1.973670  |
| 20               | 1                | 0              | -2.296538               | -1.848399 | 2.973434  |
| 21               | 1                | 0              | -3.302635               | -2.979570 | 2.045445  |
| 22               | 1                | 0              | -1.586976               | -2.738066 | 1.616134  |
| 23               | 6                | 0              | -4.110353               | -0.375104 | 1.554915  |
| 24               | 1                | 0              | -4.984712               | -1.029067 | 1.468503  |
| 25               | 1                | 0              | -3.984750               | -0.111843 | 2.608993  |
| 26               | 1                | 0              | -4.302842               | 0.541646  | 0.993684  |
| 27               | 6                | 0              | -3.695088               | -0.520372 | -1.316742 |
| 28               | 1                | 0              | -3.479914               | -0.736159 | -2.366730 |
| 29               | 1                | 0              | -4.772794               | -0.618718 | -1.152354 |
| 30               | 1                | 0              | -3.397080               | 0.510705  | -1.114757 |
| 31               | 6                | 0              | 2.608522                | -1.948774 | 0.344067  |
| 32               | 6                | 0              | 2.423862                | -1.545454 | -1.153235 |
| 33               | 5                | 0              | 0.829910                | -0.477800 | 0.143159  |

|    |   |   |           |           |           |
|----|---|---|-----------|-----------|-----------|
| 34 | 8 | 0 | 1.354316  | -1.585721 | 0.911607  |
| 35 | 8 | 0 | 1.639879  | -0.358416 | -1.060299 |
| 36 | 6 | 0 | 3.718523  | -1.231881 | -1.890376 |
| 37 | 1 | 0 | 4.383989  | -2.101946 | -1.901893 |
| 38 | 1 | 0 | 3.494727  | -0.961710 | -2.926446 |
| 39 | 1 | 0 | 4.242780  | -0.394463 | -1.424627 |
| 40 | 6 | 0 | 3.722561  | -1.146748 | 1.025747  |
| 41 | 1 | 0 | 3.632345  | -1.278765 | 2.107812  |
| 42 | 1 | 0 | 4.715975  | -1.484759 | 0.713958  |
| 43 | 1 | 0 | 3.634707  | -0.079775 | 0.801447  |
| 44 | 6 | 0 | 2.833406  | -3.437457 | 0.573763  |
| 45 | 1 | 0 | 3.720355  | -3.789827 | 0.035665  |
| 46 | 1 | 0 | 2.982409  | -3.626868 | 1.640672  |
| 47 | 1 | 0 | 1.965793  | -4.011232 | 0.243999  |
| 48 | 6 | 0 | 1.607912  | -2.584657 | -1.925983 |
| 49 | 1 | 0 | 1.336683  | -2.160934 | -2.897318 |
| 50 | 1 | 0 | 2.171218  | -3.507907 | -2.094549 |
| 51 | 1 | 0 | 0.683031  | -2.813036 | -1.388488 |
| 52 | 6 | 0 | -1.422107 | 2.480015  | -0.408452 |
| 53 | 6 | 0 | -1.190943 | 3.771983  | -0.870333 |
| 54 | 6 | 0 | -0.093925 | 2.799450  | -2.770122 |
| 55 | 6 | 0 | -0.368918 | 1.545896  | -2.229342 |
| 56 | 1 | 0 | -1.929218 | 2.276409  | 0.533664  |
| 57 | 1 | 0 | -1.528843 | 4.627791  | -0.296339 |
| 58 | 1 | 0 | 0.438236  | 2.881635  | -3.711275 |
| 59 | 7 | 0 | -1.019929 | 1.398025  | -1.075116 |
| 60 | 1 | 0 | -0.034341 | 0.624419  | -2.697364 |
| 61 | 6 | 0 | 1.464851  | 3.296387  | 2.417930  |
| 62 | 6 | 0 | -0.512791 | 3.930530  | -2.075786 |
| 63 | 1 | 0 | 1.573935  | 4.224641  | 2.969657  |
| 64 | 1 | 0 | -0.312498 | 4.922752  | -2.468706 |

---

## IntF2

|                                              |              |
|----------------------------------------------|--------------|
| Thermal correction to Energy=                | 0.579896     |
| Thermal correction to Enthalpy=              | 0.580840     |
| Thermal correction to Gibbs Free Energy=     | 0.491088     |
| Sum of electronic and zero-point Energies=   | -1318.061105 |
| Sum of electronic and thermal Energies=      | -1318.031295 |
| Sum of electronic and thermal Enthalpies=    | -1318.030351 |
| Sum of electronic and thermal Free Energies= | -1318.120103 |

Esol = -1319.0648664

| Center<br>Number | Atomic<br>Number | Atomic<br>Type | Coordinates (Angstroms) |           |           |
|------------------|------------------|----------------|-------------------------|-----------|-----------|
|                  |                  |                | X                       | Y         | Z         |
| 1                | 6                | 0              | -0.887217               | 2.144557  | -3.172690 |
| 2                | 6                | 0              | -1.587497               | 3.442627  | -1.277785 |
| 3                | 6                | 0              | -0.848443               | 1.029551  | -2.349749 |
| 4                | 1                | 0              | -0.627222               | 2.048864  | -4.220094 |
| 5                | 6                | 0              | -1.535816               | 2.283241  | -0.516131 |
| 6                | 1                | 0              | -1.886514               | 4.377074  | -0.817368 |
| 7                | 1                | 0              | -0.554719               | 0.040482  | -2.683774 |
| 8                | 1                | 0              | -1.787209               | 2.238054  | 0.539711  |
| 9                | 7                | 0              | -1.170695               | 1.112682  | -1.052094 |
| 10               | 6                | 0              | 2.476680                | -1.185918 | -1.282854 |
| 11               | 6                | 0              | 2.659317                | -1.689321 | 0.184293  |
| 12               | 5                | 0              | 0.868789                | -0.227345 | 0.080186  |
| 13               | 8                | 0              | 1.680744                | -0.014639 | -1.114159 |
| 14               | 8                | 0              | 1.397330                | -1.384114 | 0.767444  |
| 15               | 6                | 0              | 2.904745                | -3.186307 | 0.313924  |
| 16               | 1                | 0              | 3.799802                | -3.490416 | -0.240194 |
| 17               | 1                | 0              | 3.049579                | -3.444966 | 1.366907  |
| 18               | 1                | 0              | 2.046018                | -3.747291 | -0.059152 |
| 19               | 6                | 0              | 1.671507                | -2.178676 | -2.125714 |
| 20               | 1                | 0              | 1.421588                | -1.699455 | -3.077984 |
| 21               | 1                | 0              | 2.236533                | -3.090914 | -2.341819 |
| 22               | 1                | 0              | 0.738277                | -2.434549 | -1.613492 |
| 23               | 6                | 0              | 3.772343                | -0.815042 | -1.990927 |
| 24               | 1                | 0              | 4.445721                | -1.677116 | -2.050116 |
| 25               | 1                | 0              | 3.552909                | -0.484127 | -3.010224 |
| 26               | 1                | 0              | 4.285685                | -0.002513 | -1.472392 |
| 27               | 6                | 0              | 3.756159                | -0.913977 | 0.922763  |
| 28               | 1                | 0              | 3.667455                | -1.119624 | 1.993440  |
| 29               | 1                | 0              | 4.757008                | -1.210126 | 0.592639  |
| 30               | 1                | 0              | 3.644803                | 0.163317  | 0.767485  |
| 31               | 6                | 0              | -2.659311               | -1.689329 | -0.184293 |
| 32               | 6                | 0              | -2.476676               | -1.185926 | 1.282855  |
| 33               | 5                | 0              | -0.868788               | -0.227348 | -0.080186 |
| 34               | 8                | 0              | -1.397325               | -1.384119 | -0.767444 |
| 35               | 8                | 0              | -1.680743               | -0.014644 | 1.114158  |
| 36               | 6                | 0              | -3.772339               | -0.815053 | 1.990928  |
| 37               | 1                | 0              | -4.445715               | -1.677128 | 2.050117  |
| 38               | 1                | 0              | -3.552906               | -0.484137 | 3.010224  |
| 39               | 1                | 0              | -4.285683               | -0.002525 | 1.472393  |
| 40               | 6                | 0              | -3.756155               | -0.913988 | -0.922763 |

|    |   |   |           |           |           |
|----|---|---|-----------|-----------|-----------|
| 41 | 1 | 0 | -3.667452 | -1.119636 | -1.993440 |
| 42 | 1 | 0 | -4.757003 | -1.210140 | -0.592638 |
| 43 | 1 | 0 | -3.644803 | 0.163306  | -0.767486 |
| 44 | 6 | 0 | -2.904735 | -3.186316 | -0.313924 |
| 45 | 1 | 0 | -3.799791 | -3.490427 | 0.240196  |
| 46 | 1 | 0 | -3.049568 | -3.444976 | -1.366906 |
| 47 | 1 | 0 | -2.046006 | -3.747297 | 0.059153  |
| 48 | 6 | 0 | -1.671499 | -2.178681 | 2.125715  |
| 49 | 1 | 0 | -1.421582 | -1.699459 | 3.077984  |
| 50 | 1 | 0 | -2.236523 | -3.090921 | 2.341819  |
| 51 | 1 | 0 | -0.738268 | -2.434551 | 1.613492  |
| 52 | 6 | 0 | 1.535808  | 2.283247  | 0.516131  |
| 53 | 6 | 0 | 1.587485  | 3.442632  | 1.277785  |
| 54 | 6 | 0 | 0.887207  | 2.144560  | 3.172690  |
| 55 | 6 | 0 | 0.848439  | 1.029554  | 2.349749  |
| 56 | 1 | 0 | 1.787203  | 2.238060  | -0.539710 |
| 57 | 1 | 0 | 1.886498  | 4.377081  | 0.817368  |
| 58 | 1 | 0 | 0.627212  | 2.048866  | 4.220093  |
| 59 | 7 | 0 | 1.170692  | 1.112686  | 1.052094  |
| 60 | 1 | 0 | 0.554719  | 0.040484  | 2.683774  |
| 61 | 6 | 0 | -1.258672 | 3.371128  | -2.627903 |
| 62 | 6 | 0 | 1.258658  | 3.371132  | 2.627903  |
| 63 | 1 | 0 | 1.290676  | 4.260283  | 3.249247  |
| 64 | 1 | 0 | -1.290694 | 4.260278  | -3.249248 |

---

### TSF3

|                                              |              |
|----------------------------------------------|--------------|
| Thermal correction to Energy=                | 0.578993     |
| Thermal correction to Enthalpy=              | 0.579937     |
| Thermal correction to Gibbs Free Energy=     | 0.494157     |
| Sum of electronic and zero-point Energies=   | -1318.042261 |
| Sum of electronic and thermal Energies=      | -1318.013335 |
| Sum of electronic and thermal Enthalpies=    | -1318.012391 |
| Sum of electronic and thermal Free Energies= | -1318.098171 |

Esol = -1319.0445187

---

| Center<br>Number | Atomic<br>Number | Atomic<br>Type | Coordinates (Angstroms) |          |           |
|------------------|------------------|----------------|-------------------------|----------|-----------|
|                  |                  |                | X                       | Y        | Z         |
| 1                | 6                | 0              | 0.243134                | 2.083676 | -3.217024 |
| 2                | 6                | 0              | -0.666698               | 3.542559 | -1.551108 |
| 3                | 6                | 0              | -0.129289               | 1.007659 | -2.468227 |

|    |   |   |           |           |           |
|----|---|---|-----------|-----------|-----------|
| 4  | 1 | 0 | 0.720551  | 1.912737  | -4.174934 |
| 5  | 6 | 0 | -0.994304 | 2.422918  | -0.781329 |
| 6  | 1 | 0 | -0.911518 | 4.522079  | -1.153571 |
| 7  | 1 | 0 | 0.015528  | -0.019767 | -2.775297 |
| 8  | 1 | 0 | -1.591320 | 2.475500  | 0.121693  |
| 9  | 7 | 0 | -0.760672 | 1.157275  | -1.250043 |
| 10 | 6 | 0 | 2.642050  | -1.146976 | -0.763585 |
| 11 | 6 | 0 | 2.389043  | -1.819926 | 0.628978  |
| 12 | 5 | 0 | 1.018582  | -0.026861 | 0.391614  |
| 13 | 8 | 0 | 1.981863  | 0.121502  | -0.625326 |
| 14 | 8 | 0 | 1.107816  | -1.294327 | 1.006481  |
| 15 | 6 | 0 | 2.299666  | -3.336805 | 0.593768  |
| 16 | 1 | 0 | 3.227616  | -3.774508 | 0.211006  |
| 17 | 1 | 0 | 2.133324  | -3.717406 | 1.605291  |
| 18 | 1 | 0 | 1.467534  | -3.657734 | -0.035461 |
| 19 | 6 | 0 | 1.981918  | -1.910108 | -1.910785 |
| 20 | 1 | 0 | 2.049696  | -1.297692 | -2.815189 |
| 21 | 1 | 0 | 2.491871  | -2.858810 | -2.104446 |
| 22 | 1 | 0 | 0.927212  | -2.100644 | -1.692138 |
| 23 | 6 | 0 | 4.109448  | -0.892799 | -1.079589 |
| 24 | 1 | 0 | 4.671404  | -1.832634 | -1.092087 |
| 25 | 1 | 0 | 4.194375  | -0.430999 | -2.066845 |
| 26 | 1 | 0 | 4.560921  | -0.219531 | -0.349113 |
| 27 | 6 | 0 | 3.395308  | -1.362737 | 1.686544  |
| 28 | 1 | 0 | 3.049762  | -1.703026 | 2.666019  |
| 29 | 1 | 0 | 4.393610  | -1.772397 | 1.506953  |
| 30 | 1 | 0 | 3.462421  | -0.270303 | 1.707355  |
| 31 | 6 | 0 | -2.388940 | -1.820059 | -0.628981 |
| 32 | 6 | 0 | -2.641980 | -1.147129 | 0.763586  |
| 33 | 5 | 0 | -1.018576 | -0.026922 | -0.391614 |
| 34 | 8 | 0 | -1.107738 | -1.294393 | -1.006479 |
| 35 | 8 | 0 | -1.981863 | 0.121386  | 0.625329  |
| 36 | 6 | 0 | -4.109391 | -0.893033 | 1.079596  |
| 37 | 1 | 0 | -4.671297 | -1.832898 | 1.092089  |
| 38 | 1 | 0 | -4.194340 | -0.431245 | 2.066855  |
| 39 | 1 | 0 | -4.560902 | -0.219785 | 0.349126  |
| 40 | 6 | 0 | -3.395228 | -1.362912 | -1.686544 |
| 41 | 1 | 0 | -3.049667 | -1.703179 | -2.666021 |
| 42 | 1 | 0 | -4.393510 | -1.772621 | -1.506953 |
| 43 | 1 | 0 | -3.462393 | -0.270481 | -1.707348 |
| 44 | 6 | 0 | -2.299487 | -3.336933 | -0.593781 |
| 45 | 1 | 0 | -3.227421 | -3.774685 | -0.211034 |
| 46 | 1 | 0 | -2.133115 | -3.717519 | -1.605305 |
| 47 | 1 | 0 | -1.467348 | -3.657827 | 0.035455  |

|    |   |   |           |           |           |
|----|---|---|-----------|-----------|-----------|
| 48 | 6 | 0 | -1.981801 | -1.910229 | 1.910779  |
| 49 | 1 | 0 | -2.049607 | -1.297820 | 2.815186  |
| 50 | 1 | 0 | -2.491703 | -2.858959 | 2.104441  |
| 51 | 1 | 0 | -0.927086 | -2.100707 | 1.692126  |
| 52 | 6 | 0 | 0.994164  | 2.422976  | 0.781332  |
| 53 | 6 | 0 | 0.666491  | 3.542597  | 1.551113  |
| 54 | 6 | 0 | -0.243259 | 2.083658  | 3.217024  |
| 55 | 6 | 0 | 0.129228  | 1.007663  | 2.468226  |
| 56 | 1 | 0 | 1.591179  | 2.475595  | -0.121688 |
| 57 | 1 | 0 | 0.911255  | 4.522131  | 1.153579  |
| 58 | 1 | 0 | -0.720666 | 1.912689  | 4.174934  |
| 59 | 7 | 0 | 0.760605  | 1.157318  | 1.250043  |
| 60 | 1 | 0 | -0.015528 | -0.019772 | 2.775294  |
| 61 | 6 | 0 | -0.025415 | 3.397059  | -2.761530 |
| 62 | 6 | 0 | 0.025214  | 3.397057  | 2.761533  |
| 63 | 1 | 0 | -0.255695 | 4.258277  | 3.355693  |
| 64 | 1 | 0 | 0.255442  | 4.258297  | -3.355688 |

### IntF3

|                                              |              |
|----------------------------------------------|--------------|
| Thermal correction to Energy=                | 0.583238     |
| Thermal correction to Enthalpy=              | 0.584183     |
| Thermal correction to Gibbs Free Energy=     | 0.497992     |
| Sum of electronic and zero-point Energies=   | -1318.108111 |
| Sum of electronic and thermal Energies=      | -1318.079247 |
| Sum of electronic and thermal Enthalpies=    | -1318.078303 |
| Sum of electronic and thermal Free Energies= | -1318.164493 |

Esol = -1319.1190384

| Center<br>Number | Atomic<br>Number | Atomic<br>Type | Coordinates (Angstroms) |           |           |
|------------------|------------------|----------------|-------------------------|-----------|-----------|
|                  |                  |                | X                       | Y         | Z         |
| 1                | 6                | 0              | -1.204210               | 2.920602  | -0.092224 |
| 2                | 6                | 0              | -2.268959               | 0.859536  | -0.805835 |
| 3                | 6                | 0              | 0.012130                | 2.377799  | -0.287496 |
| 4                | 1                | 0              | -1.293721               | 3.941858  | 0.254495  |
| 5                | 6                | 0              | -0.964433               | 0.156171  | -0.531717 |
| 6                | 1                | 0              | -3.105745               | 0.282299  | -1.183809 |
| 7                | 1                | 0              | 0.937286                | 2.930534  | -0.164600 |
| 8                | 1                | 0              | -0.823088               | -0.704878 | -1.192591 |
| 9                | 7                | 0              | 0.160646                | 1.070895  | -0.741936 |
| 10               | 6                | 0              | 2.408251                | 1.463781  | 2.997105  |

|    |   |   |           |           |           |
|----|---|---|-----------|-----------|-----------|
| 11 | 6 | 0 | 3.265486  | 0.153014  | 3.062959  |
| 12 | 5 | 0 | 1.353601  | -0.224908 | 1.923829  |
| 13 | 8 | 0 | 1.125211  | 0.973713  | 2.555499  |
| 14 | 8 | 0 | 2.657115  | -0.666869 | 2.044069  |
| 15 | 6 | 0 | 4.735906  | 0.336702  | 2.728700  |
| 16 | 1 | 0 | 5.211158  | 1.014393  | 3.445110  |
| 17 | 1 | 0 | 5.245053  | -0.629221 | 2.779244  |
| 18 | 1 | 0 | 4.862690  | 0.743412  | 1.723839  |
| 19 | 6 | 0 | 2.912062  | 2.446923  | 1.944895  |
| 20 | 1 | 0 | 2.170284  | 3.242312  | 1.835314  |
| 21 | 1 | 0 | 3.860941  | 2.899607  | 2.247597  |
| 22 | 1 | 0 | 3.041324  | 1.960955  | 0.972355  |
| 23 | 6 | 0 | 2.223999  | 2.166979  | 4.332741  |
| 24 | 1 | 0 | 3.191376  | 2.478005  | 4.740243  |
| 25 | 1 | 0 | 1.609704  | 3.059385  | 4.189889  |
| 26 | 1 | 0 | 1.725128  | 1.521673  | 5.057118  |
| 27 | 6 | 0 | 3.105801  | -0.592151 | 4.386611  |
| 28 | 1 | 0 | 3.558320  | -1.581816 | 4.288963  |
| 29 | 1 | 0 | 3.595242  | -0.061961 | 5.208086  |
| 30 | 1 | 0 | 2.047970  | -0.722238 | 4.633373  |
| 31 | 6 | 0 | 3.437716  | 0.749429  | -2.233935 |
| 32 | 6 | 0 | 2.927638  | -0.732235 | -2.263393 |
| 33 | 5 | 0 | 1.383792  | 0.615199  | -1.306712 |
| 34 | 8 | 0 | 2.541882  | 1.367448  | -1.288122 |
| 35 | 8 | 0 | 1.524514  | -0.584137 | -1.962981 |
| 36 | 6 | 0 | 3.066729  | -1.420574 | -3.611927 |
| 37 | 1 | 0 | 4.118968  | -1.469872 | -3.910469 |
| 38 | 1 | 0 | 2.682685  | -2.440936 | -3.539557 |
| 39 | 1 | 0 | 2.503652  | -0.897831 | -4.386358 |
| 40 | 6 | 0 | 3.242345  | 1.469509  | -3.566631 |
| 41 | 1 | 0 | 3.424208  | 2.536605  | -3.419025 |
| 42 | 1 | 0 | 3.932854  | 1.098011  | -4.328585 |
| 43 | 1 | 0 | 2.218153  | 1.343802  | -3.929937 |
| 44 | 6 | 0 | 4.864360  | 0.921046  | -1.740488 |
| 45 | 1 | 0 | 5.564213  | 0.399719  | -2.401502 |
| 46 | 1 | 0 | 5.124142  | 1.982808  | -1.733922 |
| 47 | 1 | 0 | 4.981009  | 0.529821  | -0.728014 |
| 48 | 6 | 0 | 3.543061  | -1.590205 | -1.162063 |
| 49 | 1 | 0 | 3.013115  | -2.545994 | -1.133694 |
| 50 | 1 | 0 | 4.601247  | -1.787898 | -1.356741 |
| 51 | 1 | 0 | 3.443487  | -1.112087 | -0.181961 |
| 52 | 6 | 0 | -0.956091 | -0.376842 | 0.936920  |
| 53 | 6 | 0 | -2.053555 | -1.395584 | 1.112065  |
| 54 | 6 | 0 | -0.437785 | -3.107976 | 0.523977  |

|    |   |   |           |           |           |
|----|---|---|-----------|-----------|-----------|
| 55 | 6 | 0 | 0.576913  | -2.271629 | 0.811902  |
| 56 | 1 | 0 | -1.097146 | 0.485621  | 1.596041  |
| 57 | 1 | 0 | -3.039045 | -1.056279 | 1.411763  |
| 58 | 1 | 0 | -0.231461 | -4.116819 | 0.190764  |
| 59 | 7 | 0 | 0.346052  | -0.971697 | 1.252304  |
| 60 | 1 | 0 | 1.619459  | -2.568945 | 0.778563  |
| 61 | 6 | 0 | -2.378218 | 2.161150  | -0.503941 |
| 62 | 6 | 0 | -1.798369 | -2.679338 | 0.823246  |
| 63 | 1 | 0 | -3.322163 | 2.683070  | -0.631815 |
| 64 | 1 | 0 | -2.582720 | -3.428507 | 0.882138  |

---

#### TSF4

|                                              |              |
|----------------------------------------------|--------------|
| Thermal correction to Energy=                | 0.578342     |
| Thermal correction to Enthalpy=              | 0.579286     |
| Thermal correction to Gibbs Free Energy=     | 0.489733     |
| Sum of electronic and zero-point Energies=   | -1318.054556 |
| Sum of electronic and thermal Energies=      | -1318.024990 |
| Sum of electronic and thermal Enthalpies=    | -1318.024045 |
| Sum of electronic and thermal Free Energies= | -1318.113599 |

Esol = -1319.0627074

---

| Center<br>Number | Atomic<br>Number | Atomic<br>Type | Coordinates (Angstroms) |           |           |
|------------------|------------------|----------------|-------------------------|-----------|-----------|
|                  |                  |                | X                       | Y         | Z         |
| 1                | 6                | 0              | -1.068578               | 3.095505  | -0.127042 |
| 2                | 6                | 0              | -2.262175               | 1.116032  | -0.787804 |
| 3                | 6                | 0              | 0.106867                | 2.464744  | -0.348731 |
| 4                | 1                | 0              | -1.044931               | 4.127420  | 0.205245  |
| 5                | 6                | 0              | -1.053940               | 0.437495  | -0.915136 |
| 6                | 1                | 0              | -3.171293               | 0.551507  | -0.972043 |
| 7                | 1                | 0              | 1.069370                | 2.946813  | -0.246679 |
| 8                | 1                | 0              | -0.971582               | -0.555801 | -1.337120 |
| 9                | 7                | 0              | 0.160423                | 1.135407  | -0.796804 |
| 10               | 6                | 0              | 2.303360                | 1.559236  | 2.965462  |
| 11               | 6                | 0              | 3.283356                | 0.336784  | 2.874189  |
| 12               | 5                | 0              | 1.343145                | -0.157523 | 1.843638  |
| 13               | 8                | 0              | 1.047922                | 0.990930  | 2.535692  |
| 14               | 8                | 0              | 2.689386                | -0.468809 | 1.833707  |
| 15               | 6                | 0              | 4.703063                | 0.693178  | 2.468752  |
| 16               | 1                | 0              | 5.161563                | 1.351674  | 3.213427  |
| 17               | 1                | 0              | 5.303249                | -0.218657 | 2.402403  |



|    |   |   |           |           |           |
|----|---|---|-----------|-----------|-----------|
| 18 | 1 | 0 | 4.720062  | 1.191350  | 1.498086  |
| 19 | 6 | 0 | 2.665902  | 2.681278  | 1.998086  |
| 20 | 1 | 0 | 1.832350  | 3.387702  | 1.965883  |
| 21 | 1 | 0 | 3.561551  | 3.213896  | 2.331922  |
| 22 | 1 | 0 | 2.837551  | 2.292279  | 0.990038  |
| 23 | 6 | 0 | 2.118888  | 2.115633  | 4.369313  |
| 24 | 1 | 0 | 3.072633  | 2.473406  | 4.770267  |
| 25 | 1 | 0 | 1.424181  | 2.958464  | 4.335744  |
| 26 | 1 | 0 | 1.709818  | 1.363288  | 5.045196  |
| 27 | 6 | 0 | 3.285797  | -0.517537 | 4.140868  |
| 28 | 1 | 0 | 3.831866  | -1.442228 | 3.939663  |
| 29 | 1 | 0 | 3.767258  | -0.001011 | 4.975525  |
| 30 | 1 | 0 | 2.265108  | -0.781246 | 4.434017  |
| 31 | 6 | 0 | 3.487366  | 0.573277  | -2.051323 |
| 32 | 6 | 0 | 2.862421  | -0.856515 | -2.219656 |
| 33 | 5 | 0 | 1.397292  | 0.546604  | -1.213463 |
| 34 | 8 | 0 | 2.613383  | 1.189199  | -1.081194 |
| 35 | 8 | 0 | 1.469307  | -0.630532 | -1.916444 |
| 36 | 6 | 0 | 2.957660  | -1.424125 | -3.627900 |
| 37 | 1 | 0 | 4.004232  | -1.523412 | -3.933224 |
| 38 | 1 | 0 | 2.499393  | -2.415905 | -3.649682 |
| 39 | 1 | 0 | 2.436489  | -0.791807 | -4.348135 |
| 40 | 6 | 0 | 3.392398  | 1.415745  | -3.322356 |
| 41 | 1 | 0 | 3.664797  | 2.446121  | -3.081825 |
| 42 | 1 | 0 | 4.065399  | 1.048380  | -4.101697 |
| 43 | 1 | 0 | 2.370474  | 1.415689  | -3.713443 |
| 44 | 6 | 0 | 4.906325  | 0.583500  | -1.509628 |
| 45 | 1 | 0 | 5.584861  | 0.071920  | -2.199741 |
| 46 | 1 | 0 | 5.246699  | 1.616829  | -1.398052 |
| 47 | 1 | 0 | 4.957455  | 0.094074  | -0.535709 |
| 48 | 6 | 0 | 3.405212  | -1.861840 | -1.209240 |
| 49 | 1 | 0 | 2.778788  | -2.756852 | -1.247014 |
| 50 | 1 | 0 | 4.433879  | -2.145796 | -1.451162 |
| 51 | 1 | 0 | 3.377263  | -1.454518 | -0.194231 |
| 52 | 6 | 0 | -1.016536 | -0.670801 | 1.316422  |
| 53 | 6 | 0 | -1.995562 | -1.632308 | 1.085194  |
| 54 | 6 | 0 | -0.282230 | -3.235992 | 0.563410  |
| 55 | 6 | 0 | 0.668554  | -2.330132 | 0.886062  |
| 56 | 1 | 0 | -1.228840 | 0.305760  | 1.732055  |
| 57 | 1 | 0 | -3.031310 | -1.319300 | 1.176744  |
| 58 | 1 | 0 | 0.033541  | -4.224146 | 0.247711  |
| 59 | 7 | 0 | 0.340794  | -1.036069 | 1.320554  |
| 60 | 1 | 0 | 1.727069  | -2.550878 | 0.880511  |
| 61 | 6 | 0 | -2.313828 | 2.430700  | -0.365951 |

|    |   |   |           |           |           |
|----|---|---|-----------|-----------|-----------|
| 62 | 6 | 0 | -1.672140 | -2.911945 | 0.676650  |
| 63 | 1 | 0 | -3.255603 | 2.944382  | -0.222532 |
| 64 | 1 | 0 | -2.435005 | -3.646155 | 0.452261  |

---

### IntF4

|                                              |             |
|----------------------------------------------|-------------|
| Thermal correction to Energy=                | 0.287664    |
| Thermal correction to Enthalpy=              | 0.288608    |
| Thermal correction to Gibbs Free Energy=     | 0.231466    |
| Sum of electronic and zero-point Energies=   | -659.023644 |
| Sum of electronic and thermal Energies=      | -659.008995 |
| Sum of electronic and thermal Enthalpies=    | -659.008051 |
| Sum of electronic and thermal Free Energies= | -659.065194 |

Esol = -659.529766

---

| Center<br>Number | Atomic<br>Number | Atomic<br>Type | Coordinates (Angstroms) |           |           |
|------------------|------------------|----------------|-------------------------|-----------|-----------|
|                  |                  |                | X                       | Y         | Z         |
| 1                | 6                | 0              | 2.297045                | 1.188996  | -0.185256 |
| 2                | 6                | 0              | 3.657955                | 1.192042  | -0.186190 |
| 3                | 6                | 0              | 3.657954                | -1.192045 | 0.186184  |
| 4                | 6                | 0              | 2.297044                | -1.188998 | 0.185251  |
| 5                | 7                | 0              | 1.571394                | -0.000001 | -0.000002 |
| 6                | 1                | 0              | 1.692093                | 2.075593  | -0.323328 |
| 7                | 1                | 0              | 4.165231                | 2.139438  | -0.334370 |
| 8                | 1                | 0              | 4.165230                | -2.139442 | 0.334363  |
| 9                | 1                | 0              | 1.692092                | -2.075595 | 0.323324  |
| 10               | 5                | 0              | 0.142364                | 0.000000  | 0.000000  |
| 11               | 8                | 0              | -0.607617               | -1.129466 | 0.231025  |
| 12               | 8                | 0              | -0.607617               | 1.129467  | -0.231022 |
| 13               | 6                | 0              | -1.966338               | -0.775649 | -0.105873 |
| 14               | 6                | 0              | -1.966337               | 0.775651  | 0.105881  |
| 15               | 6                | 0              | -2.914735               | -1.541287 | 0.800885  |
| 16               | 1                | 0              | -3.947574               | -1.220834 | 0.630399  |
| 17               | 1                | 0              | -2.847036               | -2.609882 | 0.582472  |
| 18               | 1                | 0              | -2.666566               | -1.390208 | 1.852369  |
| 19               | 6                | 0              | -2.183995               | -1.167917 | -1.565393 |
| 20               | 1                | 0              | -1.956080               | -2.230009 | -1.681136 |
| 21               | 1                | 0              | -3.218019               | -0.995880 | -1.876525 |
| 22               | 1                | 0              | -1.520369               | -0.599708 | -2.223785 |
| 23               | 6                | 0              | -2.914736               | 1.541291  | -0.800873 |
| 24               | 1                | 0              | -3.947575               | 1.220843  | -0.630381 |

|    |   |   |           |           |           |
|----|---|---|-----------|-----------|-----------|
| 25 | 1 | 0 | -2.847031 | 2.609886  | -0.582463 |
| 26 | 1 | 0 | -2.666573 | 1.390210  | -1.852359 |
| 27 | 6 | 0 | -2.183988 | 1.167920  | 1.565403  |
| 28 | 1 | 0 | -1.956071 | 2.230012  | 1.681144  |
| 29 | 1 | 0 | -3.218011 | 0.995884  | 1.876538  |
| 30 | 1 | 0 | -1.520359 | 0.599710  | 2.223792  |
| 31 | 6 | 0 | 4.395838  | -0.000002 | -0.000003 |
| 32 | 1 | 0 | 5.477238  | -0.000002 | -0.000003 |

---

### 1,1-Diphenylethylene

|                                              |             |
|----------------------------------------------|-------------|
| Thermal correction to Energy=                | 0.227641    |
| Thermal correction to Enthalpy=              | 0.228586    |
| Thermal correction to Gibbs Free Energy=     | 0.178866    |
| Sum of electronic and zero-point Energies=   | -540.260003 |
| Sum of electronic and thermal Energies=      | -540.249035 |
| Sum of electronic and thermal Enthalpies=    | -540.248090 |
| Sum of electronic and thermal Free Energies= | -540.297810 |

Esol=-540.6552872

---

| Center<br>Number | Atomic<br>Number | Atomic<br>Type | Coordinates (Angstroms) |           |           |
|------------------|------------------|----------------|-------------------------|-----------|-----------|
|                  |                  |                | X                       | Y         | Z         |
| 1                | 6                | 0              | -3.554406               | -1.139197 | 0.168162  |
| 2                | 6                | 0              | -2.185340               | -1.197498 | 0.403551  |
| 3                | 6                | 0              | -1.336638               | -0.185882 | -0.062927 |
| 4                | 6                | 0              | -1.892677               | 0.870940  | -0.792145 |
| 5                | 6                | 0              | -3.261853               | 0.928267  | -1.030019 |
| 6                | 6                | 0              | -4.097659               | -0.075393 | -0.548023 |
| 7                | 1                | 0              | -4.199668               | -1.926282 | 0.545316  |
| 8                | 1                | 0              | -1.763666               | -2.028193 | 0.961938  |
| 9                | 1                | 0              | -1.237335               | 1.639819  | -1.190098 |
| 10               | 1                | 0              | -3.675408               | 1.753057  | -1.601914 |
| 11               | 1                | 0              | -5.165592               | -0.033341 | -0.736580 |
| 12               | 6                | 0              | 0.121691                | -0.223074 | 0.233844  |
| 13               | 6                | 0              | 0.794928                | 0.898856  | 0.520254  |
| 14               | 1                | 0              | 1.866689                | 0.884517  | 0.687911  |
| 15               | 1                | 0              | 0.290046                | 1.856197  | 0.595505  |
| 16               | 6                | 0              | 0.812922                | -1.541578 | 0.211634  |
| 17               | 6                | 0              | 1.799269                | -1.844172 | 1.156731  |
| 18               | 6                | 0              | 0.505292                | -2.496584 | -0.765182 |
| 19               | 6                | 0              | 2.475292                | -3.059034 | 1.116173  |

|    |   |   |           |           |           |
|----|---|---|-----------|-----------|-----------|
| 20 | 1 | 0 | 2.016793  | -1.124424 | 1.940194  |
| 21 | 6 | 0 | 1.183431  | -3.709768 | -0.808233 |
| 22 | 1 | 0 | -0.265489 | -2.277430 | -1.498383 |
| 23 | 6 | 0 | 2.171581  | -3.994739 | 0.131350  |
| 24 | 1 | 0 | 3.233170  | -3.278536 | 1.861653  |
| 25 | 1 | 0 | 0.940808  | -4.434791 | -1.578848 |
| 26 | 1 | 0 | 2.696135  | -4.944361 | 0.100127  |

---

## G

|                                              |             |
|----------------------------------------------|-------------|
| Thermal correction to Energy=                | 0.123490    |
| Thermal correction to Enthalpy=              | 0.124434    |
| Thermal correction to Gibbs Free Energy=     | 0.087078    |
| Sum of electronic and zero-point Energies=   | -287.360713 |
| Sum of electronic and thermal Energies=      | -287.354669 |
| Sum of electronic and thermal Enthalpies=    | -287.353724 |
| Sum of electronic and thermal Free Energies= | -287.391080 |

Esol =-287.5766511

---

| Center<br>Number | Atomic<br>Number | Atomic<br>Type | Coordinates (Angstroms) |           |           |
|------------------|------------------|----------------|-------------------------|-----------|-----------|
|                  |                  |                | X                       | Y         | Z         |
| 1                | 6                | 0              | -1.162473               | 1.135018  | 0.005887  |
| 2                | 6                | 0              | 0.227920                | 1.188783  | -0.009559 |
| 3                | 6                | 0              | 0.957957                | 0.000477  | -0.015123 |
| 4                | 6                | 0              | 0.228207                | -1.188285 | -0.009646 |
| 5                | 6                | 0              | -1.161975               | -1.135035 | 0.005797  |
| 6                | 7                | 0              | -1.863655               | -0.000030 | 0.013767  |
| 7                | 1                | 0              | -1.743005               | 2.054995  | 0.008633  |
| 8                | 1                | 0              | 0.735334                | 2.148867  | -0.019695 |
| 9                | 1                | 0              | 0.736049                | -2.148166 | -0.019883 |
| 10               | 1                | 0              | -1.742308               | -2.055123 | 0.008481  |
| 11               | 6                | 0              | 2.462991                | 0.000052  | -0.001162 |
| 12               | 1                | 0              | 2.863410                | 0.894819  | -0.483071 |
| 13               | 1                | 0              | 2.834956                | -0.017667 | 1.028332  |
| 14               | 1                | 0              | 2.862817                | -0.878425 | -0.512785 |

---

## TSG1

|                                          |          |
|------------------------------------------|----------|
| Thermal correction to Energy=            | 0.512074 |
| Thermal correction to Enthalpy=          | 0.513018 |
| Thermal correction to Gibbs Free Energy= | 0.430195 |

Sum of electronic and zero-point Energies= -1109.225108  
 Sum of electronic and thermal Energies= -1109.198854  
 Sum of electronic and thermal Enthalpies= -1109.197910  
 Sum of electronic and thermal Free Energies= -1109.280733

Esol =-1110.0977339

| Center<br>Number | Atomic<br>Number | Atomic<br>Type | Coordinates (Angstroms) |           |           |
|------------------|------------------|----------------|-------------------------|-----------|-----------|
|                  |                  |                | X                       | Y         | Z         |
| 1                | 6                | 0              | 1.133993                | 2.852447  | -1.203564 |
| 2                | 6                | 0              | 0.767036                | 3.051315  | 1.150007  |
| 3                | 6                | 0              | 0.343989                | 1.710808  | -1.186518 |
| 4                | 1                | 0              | 1.576870                | 3.193426  | -2.134155 |
| 5                | 6                | 0              | -0.010721               | 1.901323  | 1.080719  |
| 6                | 1                | 0              | 0.917780                | 3.549032  | 2.102710  |
| 7                | 1                | 0              | 0.154720                | 1.117029  | -2.077556 |
| 8                | 1                | 0              | -0.486837               | 1.457207  | 1.952187  |
| 9                | 7                | 0              | -0.217989               | 1.255532  | -0.065672 |
| 10               | 6                | 0              | 2.590073                | -1.823013 | -0.714028 |
| 11               | 6                | 0              | 2.652500                | -1.372081 | 0.778882  |
| 12               | 5                | 0              | 0.512159                | -1.229558 | 0.019337  |
| 13               | 8                | 0              | 1.286543                | -1.363659 | -1.117191 |
| 14               | 8                | 0              | 1.265752                | -1.392679 | 1.164601  |
| 15               | 6                | 0              | 3.439783                | -2.294770 | 1.695776  |
| 16               | 1                | 0              | 4.483285                | -2.363265 | 1.371033  |
| 17               | 1                | 0              | 3.422447                | -1.898797 | 2.714280  |
| 18               | 1                | 0              | 3.008798                | -3.296786 | 1.712936  |
| 19               | 6                | 0              | 2.600149                | -3.342239 | -0.875441 |
| 20               | 1                | 0              | 2.338274                | -3.586062 | -1.907679 |
| 21               | 1                | 0              | 3.583914                | -3.765414 | -0.652631 |
| 22               | 1                | 0              | 1.859946                | -3.804909 | -0.216735 |
| 23               | 6                | 0              | 3.635002                | -1.186933 | -1.618192 |
| 24               | 1                | 0              | 4.645676                | -1.435890 | -1.278440 |
| 25               | 1                | 0              | 3.513273                | -1.562939 | -2.637161 |
| 26               | 1                | 0              | 3.526287                | -0.100796 | -1.639890 |
| 27               | 6                | 0              | 3.131867                | 0.071244  | 0.939851  |
| 28               | 1                | 0              | 2.937732                | 0.390755  | 1.966962  |
| 29               | 1                | 0              | 4.202762                | 0.166706  | 0.737627  |
| 30               | 1                | 0              | 2.586720                | 0.740565  | 0.265933  |
| 31               | 6                | 0              | -3.204121               | -0.270260 | -0.769025 |
| 32               | 6                | 0              | -3.253033               | -0.632507 | 0.752082  |
| 33               | 5                | 0              | -1.091104               | -0.666883 | 0.000059  |
| 34               | 8                | 0              | -1.889136               | -0.701682 | -1.145959 |

|    |   |   |           |           |           |
|----|---|---|-----------|-----------|-----------|
| 35 | 8 | 0 | -1.880231 | -0.528856 | 1.152708  |
| 36 | 6 | 0 | -4.094501 | 0.307447  | 1.603557  |
| 37 | 1 | 0 | -5.137831 | 0.305950  | 1.270796  |
| 38 | 1 | 0 | -4.067019 | -0.022444 | 2.645433  |
| 39 | 1 | 0 | -3.712429 | 1.329097  | 1.558959  |
| 40 | 6 | 0 | -3.315296 | 1.234578  | -1.025130 |
| 41 | 1 | 0 | -3.038354 | 1.430615  | -2.064764 |
| 42 | 1 | 0 | -4.337243 | 1.590955  | -0.863872 |
| 43 | 1 | 0 | -2.641067 | 1.799735  | -0.378739 |
| 44 | 6 | 0 | -4.220559 | -1.007822 | -1.630308 |
| 45 | 1 | 0 | -5.241814 | -0.786729 | -1.302398 |
| 46 | 1 | 0 | -4.117581 | -0.686687 | -2.670243 |
| 47 | 1 | 0 | -4.061367 | -2.086288 | -1.590808 |
| 48 | 6 | 0 | -3.678553 | -2.081585 | 0.995240  |
| 49 | 1 | 0 | -3.490850 | -2.327727 | 2.043110  |
| 50 | 1 | 0 | -4.739960 | -2.237950 | 0.781217  |
| 51 | 1 | 0 | -3.088970 | -2.761697 | 0.374143  |
| 52 | 6 | 0 | 1.357226  | 3.550402  | -0.012544 |
| 53 | 6 | 0 | 2.187544  | 4.804725  | 0.008117  |
| 54 | 1 | 0 | 2.996022  | 4.754514  | -0.724486 |
| 55 | 1 | 0 | 1.568417  | 5.672574  | -0.240476 |
| 56 | 1 | 0 | 2.621335  | 4.976229  | 0.995252  |

### IntG1

|                                              |              |
|----------------------------------------------|--------------|
| Thermal correction to Energy=                | 0.513299     |
| Thermal correction to Enthalpy=              | 0.514243     |
| Thermal correction to Gibbs Free Energy=     | 0.429350     |
| Sum of electronic and zero-point Energies=   | -1109.228145 |
| Sum of electronic and thermal Energies=      | -1109.201510 |
| Sum of electronic and thermal Enthalpies=    | -1109.200565 |
| Sum of electronic and thermal Free Energies= | -1109.285459 |

Esol = -1110.1021694

| Center<br>Number | Atomic<br>Number | Atomic<br>Type | Coordinates (Angstroms) |           |           |
|------------------|------------------|----------------|-------------------------|-----------|-----------|
|                  |                  |                | X                       | Y         | Z         |
| 1                | 6                | 0              | 2.521525                | -1.179351 | -1.300385 |
| 2                | 6                | 0              | 3.008776                | -1.566198 | 0.131402  |
| 3                | 5                | 0              | 0.956412                | -0.504170 | 0.257243  |
| 4                | 8                | 0              | 1.527826                | -0.192893 | -1.034887 |
| 5                | 8                | 0              | 1.804318                | -1.490994 | 0.889836  |

|    |   |   |           |           |           |
|----|---|---|-----------|-----------|-----------|
| 6  | 6 | 0 | 3.569559  | -2.977255 | 0.249725  |
| 7  | 1 | 0 | 4.422689  | -3.118497 | -0.422748 |
| 8  | 1 | 0 | 3.908561  | -3.154368 | 1.274426  |
| 9  | 1 | 0 | 2.803642  | -3.717028 | 0.011953  |
| 10 | 6 | 0 | 1.838258  | -2.352322 | -2.008255 |
| 11 | 1 | 0 | 1.334011  | -1.970998 | -2.899789 |
| 12 | 1 | 0 | 2.553916  | -3.123104 | -2.311029 |
| 13 | 1 | 0 | 1.080002  | -2.797767 | -1.357936 |
| 14 | 6 | 0 | 3.595999  | -0.576828 | -2.195095 |
| 15 | 1 | 0 | 4.421680  | -1.281099 | -2.343184 |
| 16 | 1 | 0 | 3.168093  | -0.341767 | -3.173494 |
| 17 | 1 | 0 | 3.993780  | 0.345677  | -1.766611 |
| 18 | 6 | 0 | 4.021476  | -0.559855 | 0.689876  |
| 19 | 1 | 0 | 4.118203  | -0.724736 | 1.766802  |
| 20 | 1 | 0 | 5.007168  | -0.678767 | 0.229019  |
| 21 | 1 | 0 | 3.688010  | 0.469038  | 0.527565  |
| 22 | 6 | 0 | -2.762617 | -1.798086 | -0.102506 |
| 23 | 6 | 0 | -2.736457 | -1.305518 | 1.377393  |
| 24 | 5 | 0 | -0.711962 | -0.919642 | 0.386668  |
| 25 | 8 | 0 | -1.365739 | -1.805401 | -0.446131 |
| 26 | 8 | 0 | -1.554214 | -0.482693 | 1.401331  |
| 27 | 6 | 0 | -3.936455 | -0.470791 | 1.796621  |
| 28 | 1 | 0 | -4.860970 | -1.049642 | 1.700610  |
| 29 | 1 | 0 | -3.827646 | -0.172153 | 2.842558  |
| 30 | 1 | 0 | -4.021975 | 0.432510  | 1.190725  |
| 31 | 6 | 0 | -3.448790 | -0.807371 | -1.042759 |
| 32 | 1 | 0 | -3.238989 | -1.102412 | -2.073411 |
| 33 | 1 | 0 | -4.532520 | -0.792647 | -0.894247 |
| 34 | 1 | 0 | -3.057610 | 0.202601  | -0.890832 |
| 35 | 6 | 0 | -3.331764 | -3.194272 | -0.302277 |
| 36 | 1 | 0 | -4.371669 | -3.240393 | 0.037920  |
| 37 | 1 | 0 | -3.306820 | -3.448876 | -1.364751 |
| 38 | 1 | 0 | -2.748657 | -3.940152 | 0.239812  |
| 39 | 6 | 0 | -2.506399 | -2.442623 | 2.372736  |
| 40 | 1 | 0 | -2.291810 | -2.012014 | 3.354121  |
| 41 | 1 | 0 | -3.385255 | -3.087862 | 2.459579  |
| 42 | 1 | 0 | -1.649139 | -3.050626 | 2.070184  |
| 43 | 6 | 0 | 1.372910  | 2.098240  | 0.551092  |
| 44 | 6 | 0 | 1.467995  | 3.274971  | 1.277712  |
| 45 | 6 | 0 | 1.054767  | 2.009614  | 3.261170  |
| 46 | 6 | 0 | 0.965061  | 0.874364  | 2.474750  |
| 47 | 1 | 0 | 1.503246  | 2.038217  | -0.524573 |
| 48 | 1 | 0 | 1.667597  | 4.208593  | 0.762660  |
| 49 | 1 | 0 | 0.921626  | 1.930531  | 4.334793  |

|    |   |   |          |           |          |
|----|---|---|----------|-----------|----------|
| 50 | 7 | 0 | 1.125338 | 0.929148  | 1.148473 |
| 51 | 1 | 0 | 0.762865 | -0.113233 | 2.874847 |
| 52 | 6 | 0 | 1.311715 | 3.246898  | 2.664553 |
| 53 | 6 | 0 | 1.440662 | 4.495626  | 3.491884 |
| 54 | 1 | 0 | 0.765549 | 4.470891  | 4.349883 |
| 55 | 1 | 0 | 2.461655 | 4.589215  | 3.875324 |
| 56 | 1 | 0 | 1.222471 | 5.386878  | 2.900608 |

## TSG2

|                                              |              |
|----------------------------------------------|--------------|
| Thermal correction to Energy=                | 0.638162     |
| Thermal correction to Enthalpy=              | 0.639107     |
| Thermal correction to Gibbs Free Energy=     | 0.540485     |
| Sum of electronic and zero-point Energies=   | -1396.602639 |
| Sum of electronic and thermal Energies=      | -1396.569318 |
| Sum of electronic and thermal Enthalpies=    | -1396.568374 |
| Sum of electronic and thermal Free Energies= | -1396.666996 |

Esol = -1397.6860312

| Center<br>Number | Atomic<br>Number | Atomic<br>Type | Coordinates (Angstroms) |           |           |
|------------------|------------------|----------------|-------------------------|-----------|-----------|
|                  |                  |                | X                       | Y         | Z         |
| 1                | 6                | 0              | -2.217361               | 0.448212  | 2.704546  |
| 2                | 6                | 0              | -3.222207               | 1.320186  | 0.721715  |
| 3                | 6                | 0              | -0.981913               | 0.560341  | 2.085411  |
| 4                | 1                | 0              | -2.275572               | 0.062716  | 3.716796  |
| 5                | 6                | 0              | -1.956691               | 1.416693  | 0.166862  |
| 6                | 1                | 0              | -4.086371               | 1.630832  | 0.142795  |
| 7                | 1                | 0              | -0.051937               | 0.250346  | 2.549980  |
| 8                | 1                | 0              | -1.760251               | 1.795129  | -0.831299 |
| 9                | 7                | 0              | -0.866702               | 1.031022  | 0.839412  |
| 10               | 6                | 0              | 2.027901                | -2.482435 | 1.167004  |
| 11               | 6                | 0              | 2.439825                | -2.521768 | -0.338064 |
| 12               | 5                | 0              | 1.046808                | -0.738840 | 0.040597  |
| 13               | 8                | 0              | 0.896742                | -1.601038 | 1.157211  |
| 14               | 8                | 0              | 2.069358                | -1.213573 | -0.786445 |
| 15               | 6                | 0              | 3.930373                | -2.714445 | -0.582152 |
| 16               | 1                | 0              | 4.279762                | -3.657194 | -0.147336 |
| 17               | 1                | 0              | 4.122533                | -2.741426 | -1.658097 |
| 18               | 1                | 0              | 4.505599                | -1.891480 | -0.154920 |
| 19               | 6                | 0              | 3.093990                | -1.821467 | 2.043442  |
| 20               | 1                | 0              | 2.673586                | -1.655554 | 3.039071  |
| 21               | 1                | 0              | 3.989110                | -2.442704 | 2.142164  |



|    |   |   |           |           |           |
|----|---|---|-----------|-----------|-----------|
| 22 | 1 | 0 | 3.372142  | -0.848508 | 1.627188  |
| 23 | 6 | 0 | 1.616781  | -3.825386 | 1.751713  |
| 24 | 1 | 0 | 2.444485  | -4.540878 | 1.703107  |
| 25 | 1 | 0 | 1.337570  | -3.698387 | 2.801403  |
| 26 | 1 | 0 | 0.761233  | -4.243371 | 1.217201  |
| 27 | 6 | 0 | 1.645203  | -3.552990 | -1.141201 |
| 28 | 1 | 0 | 1.804953  | -3.360219 | -2.205408 |
| 29 | 1 | 0 | 1.971302  | -4.573518 | -0.917144 |
| 30 | 1 | 0 | 0.575469  | -3.468667 | -0.938316 |
| 31 | 6 | 0 | 1.760270  | 2.964092  | 0.294974  |
| 32 | 6 | 0 | 1.504453  | 2.657153  | -1.214553 |
| 33 | 5 | 0 | 0.656451  | 0.937838  | 0.083836  |
| 34 | 8 | 0 | 1.591478  | 1.685993  | 0.896579  |
| 35 | 8 | 0 | 0.475705  | 1.672194  | -1.160950 |
| 36 | 6 | 0 | 1.014988  | 3.846848  | -2.029292 |
| 37 | 1 | 0 | 1.747758  | 4.660773  | -2.012467 |
| 38 | 1 | 0 | 0.867350  | 3.543470  | -3.069718 |
| 39 | 1 | 0 | 0.064122  | 4.223303  | -1.645369 |
| 40 | 6 | 0 | 0.722898  | 3.935004  | 0.871013  |
| 41 | 1 | 0 | 0.784710  | 3.900998  | 1.962318  |
| 42 | 1 | 0 | 0.901292  | 4.964000  | 0.542549  |
| 43 | 1 | 0 | -0.290886 | 3.649710  | 0.575819  |
| 44 | 6 | 0 | 3.163344  | 3.467792  | 0.608092  |
| 45 | 1 | 0 | 3.385847  | 4.386561  | 0.054306  |
| 46 | 1 | 0 | 3.246498  | 3.683568  | 1.677145  |
| 47 | 1 | 0 | 3.907615  | 2.710915  | 0.355165  |
| 48 | 6 | 0 | 2.726578  | 2.022005  | -1.883029 |
| 49 | 1 | 0 | 2.427119  | 1.644481  | -2.864751 |
| 50 | 1 | 0 | 3.540706  | 2.740977  | -2.018734 |
| 51 | 1 | 0 | 3.081582  | 1.172581  | -1.292680 |
| 52 | 6 | 0 | -1.759548 | -1.885465 | -0.257620 |
| 53 | 6 | 0 | -3.089206 | -1.892466 | -0.655336 |
| 54 | 6 | 0 | -2.420521 | -0.732712 | -2.631001 |
| 55 | 6 | 0 | -1.112373 | -0.762899 | -2.152685 |
| 56 | 1 | 0 | -1.429963 | -2.312642 | 0.688014  |
| 57 | 1 | 0 | -3.845735 | -2.346641 | -0.021470 |
| 58 | 1 | 0 | -2.638461 | -0.257425 | -3.582365 |
| 59 | 7 | 0 | -0.791848 | -1.331169 | -0.991495 |
| 60 | 1 | 0 | -0.292461 | -0.286167 | -2.682912 |
| 61 | 6 | 0 | -3.373918 | 0.820215  | 2.017094  |
| 62 | 6 | 0 | -3.442320 | -1.302914 | -1.873334 |
| 63 | 6 | 0 | -4.875827 | -1.281724 | -2.331380 |
| 64 | 1 | 0 | -5.513168 | -0.798200 | -1.584712 |
| 65 | 1 | 0 | -4.985022 | -0.744321 | -3.275136 |

|    |   |   |           |           |           |
|----|---|---|-----------|-----------|-----------|
| 66 | 1 | 0 | -5.252586 | -2.298986 | -2.471793 |
| 67 | 6 | 0 | -4.738141 | 0.661712  | 2.629451  |
| 68 | 1 | 0 | -4.678179 | 0.550882  | 3.713565  |
| 69 | 1 | 0 | -5.373655 | 1.520526  | 2.400919  |
| 70 | 1 | 0 | -5.230273 | -0.229540 | 2.226373  |

---

## IntG2

|                                              |              |
|----------------------------------------------|--------------|
| Thermal correction to Energy=                | 0.639307     |
| Thermal correction to Enthalpy=              | 0.640251     |
| Thermal correction to Gibbs Free Energy=     | 0.542079     |
| Sum of electronic and zero-point Energies=   | -1396.606383 |
| Sum of electronic and thermal Energies=      | -1396.572976 |
| Sum of electronic and thermal Enthalpies=    | -1396.572031 |
| Sum of electronic and thermal Free Energies= | -1396.670203 |

Esol =-1397.690204

---

| Center<br>Number | Atomic<br>Number | Atomic<br>Type | Coordinates (Angstroms) |           |           |
|------------------|------------------|----------------|-------------------------|-----------|-----------|
|                  |                  |                | X                       | Y         | Z         |
| 1                | 6                | 0              | -0.880638               | 2.141912  | -3.161895 |
| 2                | 6                | 0              | -1.573777               | 3.433260  | -1.275695 |
| 3                | 6                | 0              | -0.845083               | 1.026103  | -2.345711 |
| 4                | 1                | 0              | -0.619941               | 2.046437  | -4.210859 |
| 5                | 6                | 0              | -1.527076               | 2.273881  | -0.513955 |
| 6                | 1                | 0              | -1.869642               | 4.368293  | -0.811658 |
| 7                | 1                | 0              | -0.554833               | 0.038465  | -2.686165 |
| 8                | 1                | 0              | -1.780699               | 2.233180  | 0.541532  |
| 9                | 7                | 0              | -1.167487               | 1.101894  | -1.046210 |
| 10               | 6                | 0              | 2.475557                | -1.186190 | -1.293636 |
| 11               | 6                | 0              | 2.670592                | -1.686867 | 0.172426  |
| 12               | 5                | 0              | 0.867845                | -0.239388 | 0.078532  |
| 13               | 8                | 0              | 1.673869                | -0.020701 | -1.120980 |
| 14               | 8                | 0              | 1.409094                | -1.393891 | 0.762022  |
| 15               | 6                | 0              | 2.931907                | -3.181486 | 0.302087  |
| 16               | 1                | 0              | 3.825390                | -3.477154 | -0.258830 |
| 17               | 1                | 0              | 3.087856                | -3.437392 | 1.354082  |
| 18               | 1                | 0              | 2.076138                | -3.751842 | -0.063036 |
| 19               | 6                | 0              | 1.672718                | -2.185767 | -2.131787 |
| 20               | 1                | 0              | 1.418955                | -1.711535 | -3.085416 |
| 21               | 1                | 0              | 2.241146                | -3.096455 | -2.345583 |
| 22               | 1                | 0              | 0.741340                | -2.444233 | -1.617670 |

|    |   |   |           |           |           |
|----|---|---|-----------|-----------|-----------|
| 23 | 6 | 0 | 3.764260  | -0.807000 | -2.010748 |
| 24 | 1 | 0 | 4.440896  | -1.665541 | -2.081193 |
| 25 | 1 | 0 | 3.533913  | -0.471446 | -3.026071 |
| 26 | 1 | 0 | 4.278985  | 0.005030  | -1.492913 |
| 27 | 6 | 0 | 3.764612  | -0.900878 | 0.904698  |
| 28 | 1 | 0 | 3.676988  | -1.100157 | 1.976622  |
| 29 | 1 | 0 | 4.766937  | -1.194302 | 0.576409  |
| 30 | 1 | 0 | 3.648451  | 0.174779  | 0.742978  |
| 31 | 6 | 0 | -2.670582 | -1.686861 | -0.172506 |
| 32 | 6 | 0 | -2.475596 | -1.186250 | 1.293585  |
| 33 | 5 | 0 | -0.867849 | -0.239375 | -0.078496 |
| 34 | 8 | 0 | -1.409071 | -1.393855 | -0.762055 |
| 35 | 8 | 0 | -1.673904 | -0.020751 | 1.121006  |
| 36 | 6 | 0 | -3.764325 | -0.807083 | 2.010662  |
| 37 | 1 | 0 | -4.440969 | -1.665624 | 2.081043  |
| 38 | 1 | 0 | -3.534016 | -0.471574 | 3.026009  |
| 39 | 1 | 0 | -4.279025 | 0.004972  | 1.492841  |
| 40 | 6 | 0 | -3.764574 | -0.900829 | -0.904772 |
| 41 | 1 | 0 | -3.676922 | -1.100061 | -1.976703 |
| 42 | 1 | 0 | -4.766911 | -1.194257 | -0.576523 |
| 43 | 1 | 0 | -3.648401 | 0.174819  | -0.743000 |
| 44 | 6 | 0 | -2.931896 | -3.181473 | -0.302241 |
| 45 | 1 | 0 | -3.825396 | -3.477166 | 0.258637  |
| 46 | 1 | 0 | -3.087814 | -3.437332 | -1.354252 |
| 47 | 1 | 0 | -2.076138 | -3.751847 | 0.062882  |
| 48 | 6 | 0 | -1.672808 | -2.185883 | 2.131721  |
| 49 | 1 | 0 | -1.419068 | -1.711696 | 3.085379  |
| 50 | 1 | 0 | -2.241267 | -3.096565 | 2.345463  |
| 51 | 1 | 0 | -0.741420 | -2.444357 | 1.617627  |
| 52 | 6 | 0 | 1.527483  | 2.273753  | 0.514163  |
| 53 | 6 | 0 | 1.574214  | 3.433126  | 1.275913  |
| 54 | 6 | 0 | 0.880276  | 2.141926  | 3.161921  |
| 55 | 6 | 0 | 0.844711  | 1.026125  | 2.345728  |
| 56 | 1 | 0 | 1.781403  | 2.232995  | -0.541251 |
| 57 | 1 | 0 | 1.870408  | 4.368095  | 0.811957  |
| 58 | 1 | 0 | 0.619272  | 2.046510  | 4.210814  |
| 59 | 7 | 0 | 1.167498  | 1.101846  | 1.046318  |
| 60 | 1 | 0 | 0.554170  | 0.038544  | 2.686103  |
| 61 | 6 | 0 | -1.247607 | 3.383302  | -2.630611 |
| 62 | 6 | 0 | 1.247653  | 3.383238  | 2.630736  |
| 63 | 6 | 0 | 1.287755  | 4.609687  | 3.500356  |
| 64 | 1 | 0 | 0.311407  | 4.790929  | 3.958546  |
| 65 | 1 | 0 | 2.010503  | 4.481851  | 4.311299  |
| 66 | 1 | 0 | 1.569172  | 5.495290  | 2.927966  |

|    |   |   |           |          |           |
|----|---|---|-----------|----------|-----------|
| 67 | 6 | 0 | -1.287707 | 4.609755 | -3.500224 |
| 68 | 1 | 0 | -0.311496 | 4.790715 | -3.958815 |
| 69 | 1 | 0 | -2.010822 | 4.482113 | -4.310872 |
| 70 | 1 | 0 | -1.568645 | 5.495441 | -2.927727 |

### TSG3

|                                              |              |
|----------------------------------------------|--------------|
| Thermal correction to Energy=                | 0.638401     |
| Thermal correction to Enthalpy=              | 0.639345     |
| Thermal correction to Gibbs Free Energy=     | 0.546715     |
| Sum of electronic and zero-point Energies=   | -1396.585376 |
| Sum of electronic and thermal Energies=      | -1396.553207 |
| Sum of electronic and thermal Enthalpies=    | -1396.552263 |
| Sum of electronic and thermal Free Energies= | -1396.644893 |

Esol =-1397.6669464

| Center<br>Number | Atomic<br>Number | Atomic<br>Type | Coordinates (Angstroms) |           |           |
|------------------|------------------|----------------|-------------------------|-----------|-----------|
|                  |                  |                | X                       | Y         | Z         |
| 1                | 6                | 0              | -1.752664               | 0.871802  | -3.106584 |
| 2                | 6                | 0              | -3.219623               | -0.326835 | -1.661363 |
| 3                | 6                | 0              | -0.682566               | 0.361280  | -2.440345 |
| 4                | 1                | 0              | -1.575893               | 1.527902  | -3.953096 |
| 5                | 6                | 0              | -2.104839               | -0.801143 | -0.957562 |
| 6                | 1                | 0              | -4.203448               | -0.638148 | -1.321675 |
| 7                | 1                | 0              | 0.346286                | 0.567167  | -2.705717 |
| 8                | 1                | 0              | -2.170497               | -1.573349 | -0.199827 |
| 9                | 7                | 0              | -0.836080               | -0.497859 | -1.371133 |
| 10               | 6                | 0              | 1.460832                | 2.741525  | -0.239390 |
| 11               | 6                | 0              | 2.134666                | 2.229619  | 1.078924  |
| 12               | 5                | 0              | 0.347240                | 0.920123  | 0.579985  |
| 13               | 8                | 0              | 0.193461                | 2.066008  | -0.228338 |
| 14               | 8                | 0              | 1.614969                | 0.898544  | 1.204306  |
| 15               | 6                | 0              | 3.651930                | 2.154395  | 1.026746  |
| 16               | 1                | 0              | 4.085452                | 3.140011  | 0.827087  |
| 17               | 1                | 0              | 4.034177                | 1.800050  | 1.988020  |
| 18               | 1                | 0              | 3.975322                | 1.458505  | 0.250399  |
| 19               | 6                | 0              | 2.224783                | 2.311962  | -1.491102 |
| 20               | 1                | 0              | 1.616292                | 2.556913  | -2.367151 |
| 21               | 1                | 0              | 3.176758                | 2.844345  | -1.579788 |
| 22               | 1                | 0              | 2.410134                | 1.233894  | -1.479706 |
| 23               | 6                | 0              | 1.206267                | 4.242021  | -0.271484 |

|    |   |   |           |           |           |
|----|---|---|-----------|-----------|-----------|
| 24 | 1 | 0 | 2.147215  | 4.795699  | -0.184360 |
| 25 | 1 | 0 | 0.738104  | 4.510690  | -1.222219 |
| 26 | 1 | 0 | 0.539103  | 4.548519  | 0.535660  |
| 27 | 6 | 0 | 1.676271  | 3.015849  | 2.308629  |
| 28 | 1 | 0 | 2.011597  | 2.487659  | 3.204921  |
| 29 | 1 | 0 | 2.089512  | 4.028734  | 2.324196  |
| 30 | 1 | 0 | 0.584091  | 3.082387  | 2.338507  |
| 31 | 6 | 0 | 2.134413  | -2.229781 | -1.079027 |
| 32 | 6 | 0 | 1.460562  | -2.741629 | 0.239304  |
| 33 | 5 | 0 | 0.347110  | -0.920122 | -0.580034 |
| 34 | 8 | 0 | 1.614804  | -0.898672 | -1.204424 |
| 35 | 8 | 0 | 0.193252  | -2.066003 | 0.228278  |
| 36 | 6 | 0 | 1.205876  | -4.242104 | 0.271384  |
| 37 | 1 | 0 | 2.146775  | -4.795845 | 0.184124  |
| 38 | 1 | 0 | 0.737804  | -4.510773 | 1.222163  |
| 39 | 1 | 0 | 0.538600  | -4.548519 | -0.535699 |
| 40 | 6 | 0 | 1.675957  | -3.016008 | -2.308708 |
| 41 | 1 | 0 | 2.011337  | -2.487886 | -3.205019 |
| 42 | 1 | 0 | 2.089106  | -4.028931 | -2.324230 |
| 43 | 1 | 0 | 0.583771  | -3.082450 | -2.338593 |
| 44 | 6 | 0 | 3.651682  | -2.154655 | -1.026868 |
| 45 | 1 | 0 | 4.085142  | -3.140310 | -0.827260 |
| 46 | 1 | 0 | 4.033933  | -1.800292 | -1.988134 |
| 47 | 1 | 0 | 3.975130  | -1.458822 | -0.250495 |
| 48 | 6 | 0 | 2.224571  | -2.312149 | 1.491007  |
| 49 | 1 | 0 | 1.616074  | -2.557066 | 2.367062  |
| 50 | 1 | 0 | 3.176506  | -2.844609 | 1.579667  |
| 51 | 1 | 0 | 2.410010  | -1.234097 | 1.479624  |
| 52 | 6 | 0 | -2.104703 | 0.801391  | 0.957715  |
| 53 | 6 | 0 | -3.219481 | 0.327089  | 1.661544  |
| 54 | 6 | 0 | -1.752485 | -0.871653 | 3.106670  |
| 55 | 6 | 0 | -0.682398 | -0.361160 | 2.440384  |
| 56 | 1 | 0 | -2.170356 | 1.573658  | 0.200039  |
| 57 | 1 | 0 | -4.203314 | 0.638452  | 1.321929  |
| 58 | 1 | 0 | -1.575715 | -1.527784 | 3.953160  |
| 59 | 7 | 0 | -0.835937 | 0.498010  | 1.371201  |
| 60 | 1 | 0 | 0.346463  | -0.567108 | 2.705681  |
| 61 | 6 | 0 | -3.082384 | 0.532618  | -2.728741 |
| 62 | 6 | 0 | -3.082212 | -0.532400 | 2.728893  |
| 63 | 6 | 0 | -4.256356 | -1.091948 | 3.480216  |
| 64 | 1 | 0 | -4.299456 | -2.182986 | 3.392754  |
| 65 | 1 | 0 | -4.189769 | -0.856784 | 4.547685  |
| 66 | 1 | 0 | -5.197143 | -0.686030 | 3.101821  |
| 67 | 6 | 0 | -4.256640 | 1.092090  | -3.480026 |

|    |   |   |           |          |           |
|----|---|---|-----------|----------|-----------|
| 68 | 1 | 0 | -4.300022 | 2.183098 | -3.392421 |
| 69 | 1 | 0 | -4.190024 | 0.857101 | -4.547526 |
| 70 | 1 | 0 | -5.197327 | 0.685877 | -3.101694 |

---

### IntG3

|                                              |              |
|----------------------------------------------|--------------|
| Thermal correction to Energy=                | 0.642284     |
| Thermal correction to Enthalpy=              | 0.643228     |
| Thermal correction to Gibbs Free Energy=     | 0.549517     |
| Sum of electronic and zero-point Energies=   | -1396.653347 |
| Sum of electronic and thermal Energies=      | -1396.621031 |
| Sum of electronic and thermal Enthalpies=    | -1396.620087 |
| Sum of electronic and thermal Free Energies= | -1396.713798 |

Esol = -1397.7433476

---

| Center<br>Number | Atomic<br>Number | Atomic<br>Type | Coordinates (Angstroms) |           |           |
|------------------|------------------|----------------|-------------------------|-----------|-----------|
|                  |                  |                | X                       | Y         | Z         |
| 1                | 6                | 0              | -1.197350               | 2.918542  | -0.085683 |
| 2                | 6                | 0              | -2.261105               | 0.868169  | -0.794990 |
| 3                | 6                | 0              | 0.019120                | 2.379633  | -0.282859 |
| 4                | 1                | 0              | -1.288689               | 3.941691  | 0.259986  |
| 5                | 6                | 0              | -0.957502               | 0.162226  | -0.527270 |
| 6                | 1                | 0              | -3.100570               | 0.288741  | -1.167136 |
| 7                | 1                | 0              | 0.942543                | 2.934918  | -0.157331 |
| 8                | 1                | 0              | -0.821117               | -0.695105 | -1.194092 |
| 9                | 7                | 0              | 0.171094                | 1.073271  | -0.735055 |
| 10               | 6                | 0              | 2.419552                | 1.462890  | 2.996608  |
| 11               | 6                | 0              | 3.276722                | 0.152043  | 3.061392  |
| 12               | 5                | 0              | 1.364825                | -0.224905 | 1.921168  |
| 13               | 8                | 0              | 1.136898                | 0.973555  | 2.554057  |
| 14               | 8                | 0              | 2.668887                | -0.666698 | 2.041662  |
| 15               | 6                | 0              | 4.747323                | 0.336091  | 2.727956  |
| 16               | 1                | 0              | 5.222389                | 1.013028  | 3.445218  |
| 17               | 1                | 0              | 5.256447                | -0.629906 | 2.777597  |
| 18               | 1                | 0              | 4.874399                | 0.743852  | 1.723555  |
| 19               | 6                | 0              | 2.924216                | 2.447397  | 1.946038  |
| 20               | 1                | 0              | 2.182718                | 3.243194  | 1.837339  |
| 21               | 1                | 0              | 3.873087                | 2.899414  | 2.249827  |
| 22               | 1                | 0              | 3.053624                | 1.962842  | 0.972842  |
| 23               | 6                | 0              | 2.234873                | 2.164655  | 4.333017  |
| 24               | 1                | 0              | 3.202087                | 2.475178  | 4.741335  |
| 25               | 1                | 0              | 1.620723                | 3.057280  | 4.190842  |

|    |   |   |           |           |           |
|----|---|---|-----------|-----------|-----------|
| 26 | 1 | 0 | 1.735549  | 1.518640  | 5.056453  |
| 27 | 6 | 0 | 3.116635  | -0.594313 | 4.384381  |
| 28 | 1 | 0 | 3.569195  | -1.583892 | 4.285935  |
| 29 | 1 | 0 | 3.605744  | -0.064932 | 5.206593  |
| 30 | 1 | 0 | 2.058681  | -0.724621 | 4.630515  |
| 31 | 6 | 0 | 3.446151  | 0.753238  | -2.230542 |
| 32 | 6 | 0 | 2.936310  | -0.728495 | -2.260529 |
| 33 | 5 | 0 | 1.393403  | 0.617853  | -1.299965 |
| 34 | 8 | 0 | 2.551978  | 1.370236  | -1.282882 |
| 35 | 8 | 0 | 1.533979  | -0.581099 | -1.957696 |
| 36 | 6 | 0 | 3.073268  | -1.415450 | -3.610056 |
| 37 | 1 | 0 | 4.124975  | -1.464332 | -3.910579 |
| 38 | 1 | 0 | 2.689467  | -2.435938 | -3.537991 |
| 39 | 1 | 0 | 2.508673  | -0.892069 | -4.382961 |
| 40 | 6 | 0 | 3.248510  | 1.474332  | -3.562405 |
| 41 | 1 | 0 | 3.430471  | 2.541339  | -3.414207 |
| 42 | 1 | 0 | 3.937736  | 1.103576  | -4.325904 |
| 43 | 1 | 0 | 2.223676  | 1.348730  | -3.923948 |
| 44 | 6 | 0 | 4.873673  | 0.924624  | -1.739465 |
| 45 | 1 | 0 | 5.572507  | 0.403942  | -2.402084 |
| 46 | 1 | 0 | 5.133343  | 1.986422  | -1.732375 |
| 47 | 1 | 0 | 4.992030  | 0.532532  | -0.727525 |
| 48 | 6 | 0 | 3.554102  | -1.587587 | -1.161359 |
| 49 | 1 | 0 | 3.024597  | -2.543652 | -1.133434 |
| 50 | 1 | 0 | 4.612061  | -1.784606 | -1.358031 |
| 51 | 1 | 0 | 3.455754  | -1.110913 | -0.180449 |
| 52 | 6 | 0 | -0.947431 | -0.382123 | 0.937512  |
| 53 | 6 | 0 | -2.042127 | -1.403978 | 1.105561  |
| 54 | 6 | 0 | -0.429233 | -3.104388 | 0.519558  |
| 55 | 6 | 0 | 0.585769  | -2.271593 | 0.811244  |
| 56 | 1 | 0 | -1.093386 | 0.475417  | 1.602076  |
| 57 | 1 | 0 | -3.030673 | -1.064044 | 1.398874  |
| 58 | 1 | 0 | -0.223343 | -4.115039 | 0.186289  |
| 59 | 7 | 0 | 0.357652  | -0.971855 | 1.250802  |
| 60 | 1 | 0 | 1.627676  | -2.571328 | 0.775879  |
| 61 | 6 | 0 | -2.386904 | 2.171031  | -0.496857 |
| 62 | 6 | 0 | -1.802085 | -2.692630 | 0.817044  |
| 63 | 6 | 0 | -2.861643 | -3.757428 | 0.869973  |
| 64 | 1 | 0 | -2.949342 | -4.260240 | -0.099422 |
| 65 | 1 | 0 | -2.607983 | -4.525841 | 1.607975  |
| 66 | 1 | 0 | -3.836239 | -3.337531 | 1.128076  |
| 67 | 6 | 0 | -3.677578 | 2.926501  | -0.648514 |
| 68 | 1 | 0 | -3.968300 | 3.385525  | 0.302794  |
| 69 | 1 | 0 | -3.572646 | 3.737250  | -1.377156 |

70            1            0            -4.487529    2.270573    -0.974715

---

#### TSG4

Thermal correction to Energy=            0.637062  
Thermal correction to Enthalpy=        0.638006  
Thermal correction to Gibbs Free Energy= 0.540465  
Sum of electronic and zero-point Energies= -1396.597276  
Sum of electronic and thermal Energies= -1396.564020  
Sum of electronic and thermal Enthalpies= -1396.563076  
Sum of electronic and thermal Free Energies= -1396.660617

Esol = -1397.6830655

---

| Center<br>Number | Atomic<br>Number | Atomic<br>Type | Coordinates (Angstroms) |           |           |
|------------------|------------------|----------------|-------------------------|-----------|-----------|
|                  |                  |                | X                       | Y         | Z         |
| 1                | 6                | 0              | -1.054416               | 3.109596  | -0.126863 |
| 2                | 6                | 0              | -2.262126               | 1.151359  | -0.787741 |
| 3                | 6                | 0              | 0.114857                | 2.474162  | -0.357753 |
| 4                | 1                | 0              | -1.023256               | 4.140787  | 0.212359  |
| 5                | 6                | 0              | -1.061230               | 0.463822  | -0.929949 |
| 6                | 1                | 0              | -3.178440               | 0.595762  | -0.971152 |
| 7                | 1                | 0              | 1.079773                | 2.951585  | -0.255489 |
| 8                | 1                | 0              | -0.992852               | -0.530122 | -1.351862 |
| 9                | 7                | 0              | 0.161294                | 1.148374  | -0.811711 |
| 10               | 6                | 0              | 2.296576                | 1.557276  | 2.966282  |
| 11               | 6                | 0              | 3.271800                | 0.329923  | 2.897747  |
| 12               | 5                | 0              | 1.337555                | -0.167232 | 1.856467  |
| 13               | 8                | 0              | 1.041628                | 0.988004  | 2.537944  |
| 14               | 8                | 0              | 2.683563                | -0.483299 | 1.859350  |
| 15               | 6                | 0              | 4.697266                | 0.674566  | 2.502182  |
| 16               | 1                | 0              | 5.153101                | 1.334968  | 3.246790  |
| 17               | 1                | 0              | 5.291666                | -0.241672 | 2.447485  |
| 18               | 1                | 0              | 4.726081                | 1.166836  | 1.528807  |
| 19               | 6                | 0              | 2.671018                | 2.661492  | 1.983759  |
| 20               | 1                | 0              | 1.844920                | 3.376047  | 1.937739  |
| 21               | 1                | 0              | 3.571465                | 3.190109  | 2.310849  |
| 22               | 1                | 0              | 2.841221                | 2.254091  | 0.982763  |
| 23               | 6                | 0              | 2.107574                | 2.136052  | 4.360182  |
| 24               | 1                | 0              | 3.060279                | 2.500438  | 4.757716  |
| 25               | 1                | 0              | 1.413287                | 2.978371  | 4.309482  |
| 26               | 1                | 0              | 1.695978                | 1.395819  | 5.047783  |



|    |   |   |           |           |           |
|----|---|---|-----------|-----------|-----------|
| 27 | 6 | 0 | 3.258360  | -0.510030 | 4.173835  |
| 28 | 1 | 0 | 3.807428  | -1.436767 | 3.990426  |
| 29 | 1 | 0 | 3.729185  | 0.017286  | 5.007818  |
| 30 | 1 | 0 | 2.234046  | -0.770139 | 4.457378  |
| 31 | 6 | 0 | 3.482056  | 0.576897  | -2.076693 |
| 32 | 6 | 0 | 2.859229  | -0.855867 | -2.223153 |
| 33 | 5 | 0 | 1.394547  | 0.557027  | -1.231291 |
| 34 | 8 | 0 | 2.611128  | 1.202553  | -1.109401 |
| 35 | 8 | 0 | 1.466246  | -0.627000 | -1.923744 |
| 36 | 6 | 0 | 2.956510  | -1.446331 | -3.621565 |
| 37 | 1 | 0 | 4.003821  | -1.553641 | -3.921700 |
| 38 | 1 | 0 | 2.495628  | -2.437119 | -3.627192 |
| 39 | 1 | 0 | 2.439160  | -0.825442 | -4.354366 |
| 40 | 6 | 0 | 3.379291  | 1.401950  | -3.358421 |
| 41 | 1 | 0 | 3.656655  | 2.434895  | -3.134703 |
| 42 | 1 | 0 | 4.045470  | 1.020789  | -4.137001 |
| 43 | 1 | 0 | 2.354469  | 1.398713  | -3.741829 |
| 44 | 6 | 0 | 4.903749  | 0.598195  | -1.542330 |
| 45 | 1 | 0 | 5.580550  | 0.083363  | -2.231710 |
| 46 | 1 | 0 | 5.239711  | 1.634012  | -1.442278 |
| 47 | 1 | 0 | 4.962520  | 0.117190  | -0.564679 |
| 48 | 6 | 0 | 3.404482  | -1.841957 | -1.195934 |
| 49 | 1 | 0 | 2.784941  | -2.742354 | -1.220415 |
| 50 | 1 | 0 | 4.436190  | -2.122159 | -1.428941 |
| 51 | 1 | 0 | 3.369861  | -1.417242 | -0.188288 |
| 52 | 6 | 0 | -1.021868 | -0.693147 | 1.320843  |
| 53 | 6 | 0 | -1.991121 | -1.659728 | 1.073134  |
| 54 | 6 | 0 | -0.270894 | -3.241581 | 0.554906  |
| 55 | 6 | 0 | 0.672588  | -2.334478 | 0.888506  |
| 56 | 1 | 0 | -1.247165 | 0.280659  | 1.735035  |
| 57 | 1 | 0 | -3.031177 | -1.355650 | 1.161327  |
| 58 | 1 | 0 | 0.051751  | -4.227325 | 0.233026  |
| 59 | 7 | 0 | 0.339363  | -1.045507 | 1.328351  |
| 60 | 1 | 0 | 1.731961  | -2.551656 | 0.884789  |
| 61 | 6 | 0 | -2.319007 | 2.465136  | -0.358305 |
| 62 | 6 | 0 | -1.673322 | -2.940002 | 0.656532  |
| 63 | 6 | 0 | -2.703730 | -3.978298 | 0.326112  |
| 64 | 1 | 0 | -2.626382 | -4.309277 | -0.716900 |
| 65 | 1 | 0 | -2.592426 | -4.872547 | 0.951393  |
| 66 | 1 | 0 | -3.714144 | -3.590366 | 0.478072  |
| 67 | 6 | 0 | -3.604794 | 3.205599  | -0.140486 |
| 68 | 1 | 0 | -3.713432 | 3.532450  | 0.901037  |
| 69 | 1 | 0 | -3.663615 | 4.106660  | -0.763123 |
| 70 | 1 | 0 | -4.465309 | 2.577132  | -0.383516 |

---

**IntG4**

|                                              |             |
|----------------------------------------------|-------------|
| Thermal correction to Energy=                | 0.317707    |
| Thermal correction to Enthalpy=              | 0.318651    |
| Thermal correction to Gibbs Free Energy=     | 0.256882    |
| Sum of electronic and zero-point Energies=   | -698.293749 |
| Sum of electronic and thermal Energies=      | -698.277365 |
| Sum of electronic and thermal Enthalpies=    | -698.276421 |
| Sum of electronic and thermal Free Energies= | -698.338190 |

Esol =-698.8393335

---

| Center<br>Number | Atomic<br>Number | Atomic<br>Type | Coordinates (Angstroms) |           |           |
|------------------|------------------|----------------|-------------------------|-----------|-----------|
|                  |                  |                | X                       | Y         | Z         |
| 1                | 6                | 0              | 1.910254                | 1.190175  | -0.160808 |
| 2                | 6                | 0              | 3.269951                | 1.190770  | -0.159360 |
| 3                | 6                | 0              | 4.024669                | 0.002818  | 0.019351  |
| 4                | 6                | 0              | 3.269786                | -1.184840 | 0.199598  |
| 5                | 6                | 0              | 1.910114                | -1.184613 | 0.197504  |
| 6                | 7                | 0              | 1.180744                | 0.001702  | 0.010955  |
| 7                | 1                | 0              | 1.308777                | 2.080596  | -0.287764 |
| 8                | 1                | 0              | 3.779853                | 2.140130  | -0.296253 |
| 9                | 1                | 0              | 3.779539                | -2.132452 | 0.348596  |
| 10               | 1                | 0              | 1.308564                | -2.072947 | 0.337994  |
| 11               | 5                | 0              | -0.246954               | 0.000804  | 0.004845  |
| 12               | 8                | 0              | -0.997824               | -1.129284 | 0.232858  |
| 13               | 8                | 0              | -0.997402               | 1.130191  | -0.227979 |
| 14               | 6                | 0              | -2.355598               | -0.775659 | -0.107589 |
| 15               | 6                | 0              | -2.357003               | 0.775270  | 0.103818  |
| 16               | 6                | 0              | -3.305262               | -1.542346 | 0.797463  |
| 17               | 1                | 0              | -4.337932               | -1.220980 | 0.628855  |
| 18               | 1                | 0              | -3.238511               | -2.610342 | 0.576246  |
| 19               | 1                | 0              | -3.055604               | -1.394519 | 1.849017  |
| 20               | 6                | 0              | -2.569693               | -1.168561 | -1.567866 |
| 21               | 1                | 0              | -2.342556               | -2.230908 | -1.682223 |
| 22               | 1                | 0              | -3.602434               | -0.995293 | -1.882238 |
| 23               | 1                | 0              | -1.903293               | -0.601611 | -2.224422 |
| 24               | 6                | 0              | -3.301626               | 1.541077  | -0.807223 |
| 25               | 1                | 0              | -4.335029               | 1.218674  | -0.645215 |
| 26               | 1                | 0              | -3.237342               | 2.609127  | -0.585541 |
| 27               | 1                | 0              | -3.045112               | 1.393546  | -1.857166 |

|    |   |   |           |           |           |
|----|---|---|-----------|-----------|-----------|
| 28 | 6 | 0 | -2.580698 | 1.167951  | 1.562721  |
| 29 | 1 | 0 | -2.355201 | 2.230491  | 1.678545  |
| 30 | 1 | 0 | -3.615261 | 0.993816  | 1.870554  |
| 31 | 1 | 0 | -1.918001 | 0.601551  | 2.223490  |
| 32 | 6 | 0 | 5.523175  | -0.004633 | -0.028499 |
| 33 | 1 | 0 | 5.906862  | -0.160629 | -1.045860 |
| 34 | 1 | 0 | 5.935989  | 0.943989  | 0.327942  |
| 35 | 1 | 0 | 5.935830  | -0.803062 | 0.595689  |

---

## H

|                                              |             |
|----------------------------------------------|-------------|
| Thermal correction to Energy=                | 0.130016    |
| Thermal correction to Enthalpy=              | 0.130960    |
| Thermal correction to Gibbs Free Energy=     | 0.092764    |
| Sum of electronic and zero-point Energies=   | -362.537641 |
| Sum of electronic and thermal Energies=      | -362.531096 |
| Sum of electronic and thermal Enthalpies=    | -362.530152 |
| Sum of electronic and thermal Free Energies= | -362.568348 |

Esol =-362.793021

---

| Center<br>Number | Atomic<br>Number | Atomic<br>Type | Coordinates (Angstroms) |           |           |
|------------------|------------------|----------------|-------------------------|-----------|-----------|
|                  |                  |                | X                       | Y         | Z         |
| 1                | 6                | 0              | 1.153891                | -0.700247 | 0.000031  |
| 2                | 6                | 0              | 1.142158                | 0.684428  | 0.000216  |
| 3                | 6                | 0              | -1.253309               | 0.565070  | -0.000351 |
| 4                | 6                | 0              | -1.109616               | -0.821888 | -0.000515 |
| 5                | 7                | 0              | 0.054471                | -1.465284 | -0.000308 |
| 6                | 1                | 0              | 2.103577                | -1.230378 | 0.000200  |
| 7                | 1                | 0              | 2.056484                | 1.265960  | 0.000509  |
| 8                | 1                | 0              | -2.243235               | 1.003040  | -0.000550 |
| 9                | 1                | 0              | -2.001282               | -1.445401 | -0.000789 |
| 10               | 6                | 0              | -0.092944               | 1.339291  | 0.000043  |
| 11               | 8                | 0              | -0.063181               | 2.689130  | 0.000228  |
| 12               | 6                | 0              | -1.303491               | 3.367678  | 0.000291  |
| 13               | 1                | 0              | -1.888736               | 3.123779  | 0.894081  |
| 14               | 1                | 0              | -1.066654               | 4.430671  | 0.000460  |
| 15               | 1                | 0              | -1.888670               | 3.124037  | -0.893620 |

---

## TSH1

|                               |          |
|-------------------------------|----------|
| Thermal correction to Energy= | 0.518384 |
|-------------------------------|----------|

Thermal correction to Enthalpy= 0.519328  
 Thermal correction to Gibbs Free Energy= 0.435552  
 Sum of electronic and zero-point Energies= -1184.402718  
 Sum of electronic and thermal Energies= -1184.375863  
 Sum of electronic and thermal Enthalpies= -1184.374919  
 Sum of electronic and thermal Free Energies= -1184.458694

Esol =-1185.3143975

---

| Center<br>Number | Atomic<br>Number | Atomic<br>Type | Coordinates (Angstroms) |           |           |
|------------------|------------------|----------------|-------------------------|-----------|-----------|
|                  |                  |                | X                       | Y         | Z         |
| 1                | 6                | 0              | 1.721355                | 2.349383  | -0.977091 |
| 2                | 6                | 0              | 1.304514                | 2.527388  | 1.392327  |
| 3                | 6                | 0              | 0.667249                | 1.443163  | -1.028596 |
| 4                | 1                | 0              | 2.260355                | 2.600111  | -1.881320 |
| 5                | 6                | 0              | 0.276029                | 1.618245  | 1.230867  |
| 6                | 1                | 0              | 1.552658                | 2.947738  | 2.359353  |
| 7                | 1                | 0              | 0.377630                | 0.959570  | -1.958685 |
| 8                | 1                | 0              | -0.334289               | 1.273452  | 2.062366  |
| 9                | 7                | 0              | -0.039498               | 1.092687  | 0.041980  |
| 10               | 6                | 0              | 1.908618                | -2.548087 | -0.747855 |
| 11               | 6                | 0              | 2.025098                | -2.225794 | 0.774849  |
| 12               | 5                | 0              | 0.019876                | -1.496474 | -0.015977 |
| 13               | 8                | 0              | 0.778746                | -1.748923 | -1.143759 |
| 14               | 8                | 0              | 0.664001                | -1.920008 | 1.129207  |
| 15               | 6                | 0              | 2.519915                | -3.375514 | 1.638154  |
| 16               | 1                | 0              | 3.524146                | -3.685068 | 1.330298  |
| 17               | 1                | 0              | 2.564422                | -3.055029 | 2.682033  |
| 18               | 1                | 0              | 1.850432                | -4.234449 | 1.574214  |
| 19               | 6                | 0              | 1.543762                | -4.006738 | -1.019022 |
| 20               | 1                | 0              | 1.268656                | -4.108757 | -2.071392 |
| 21               | 1                | 0              | 2.380624                | -4.678567 | -0.807259 |
| 22               | 1                | 0              | 0.686543                | -4.308875 | -0.410986 |
| 23               | 6                | 0              | 3.113747                | -2.139484 | -1.581517 |
| 24               | 1                | 0              | 4.015963                | -2.657403 | -1.239955 |
| 25               | 1                | 0              | 2.940835                | -2.405004 | -2.627546 |
| 26               | 1                | 0              | 3.281717                | -1.062068 | -1.525716 |
| 27               | 6                | 0              | 2.845273                | -0.964793 | 1.050569  |
| 28               | 1                | 0              | 2.698731                | -0.673831 | 2.093806  |
| 29               | 1                | 0              | 3.912706                | -1.130824 | 0.877821  |
| 30               | 1                | 0              | 2.511599                | -0.136562 | 0.416576  |
| 31               | 6                | 0              | -3.299152               | 0.429300  | -0.808278 |

|    |   |   |           |           |           |
|----|---|---|-----------|-----------|-----------|
| 32 | 6 | 0 | -3.489526 | 0.011136  | 0.687211  |
| 33 | 5 | 0 | -1.388352 | -0.547325 | -0.028579 |
| 34 | 8 | 0 | -2.129383 | -0.308896 | -1.187935 |
| 35 | 8 | 0 | -2.150718 | -0.270925 | 1.116273  |
| 36 | 6 | 0 | -4.082887 | 1.091838  | 1.579750  |
| 37 | 1 | 0 | -5.079442 | 1.382097  | 1.230579  |
| 38 | 1 | 0 | -4.175240 | 0.710911  | 2.600257  |
| 39 | 1 | 0 | -3.446212 | 1.978321  | 1.602761  |
| 40 | 6 | 0 | -3.008023 | 1.922461  | -0.975192 |
| 41 | 1 | 0 | -2.657740 | 2.095035  | -1.996730 |
| 42 | 1 | 0 | -3.906946 | 2.523779  | -0.808727 |
| 43 | 1 | 0 | -2.229864 | 2.255628  | -0.285920 |
| 44 | 6 | 0 | -4.443738 | 0.029364  | -1.729681 |
| 45 | 1 | 0 | -5.382641 | 0.491543  | -1.406843 |
| 46 | 1 | 0 | -4.227383 | 0.367551  | -2.746550 |
| 47 | 1 | 0 | -4.571325 | -1.053804 | -1.752069 |
| 48 | 6 | 0 | -4.286135 | -1.286289 | 0.835622  |
| 49 | 1 | 0 | -4.204024 | -1.628240 | 1.870123  |
| 50 | 1 | 0 | -5.343884 | -1.147078 | 0.593364  |
| 51 | 1 | 0 | -3.874215 | -2.063473 | 0.185829  |
| 52 | 6 | 0 | 2.045695  | 2.904965  | 0.265047  |
| 53 | 6 | 0 | 3.813904  | 4.183918  | -0.645487 |
| 54 | 1 | 0 | 4.550275  | 4.890273  | -0.266086 |
| 55 | 1 | 0 | 4.326454  | 3.324476  | -1.091182 |
| 56 | 1 | 0 | 3.194309  | 4.673567  | -1.404566 |
| 57 | 8 | 0 | 3.037330  | 3.791051  | 0.471339  |

---

### IntH1

|                                              |              |
|----------------------------------------------|--------------|
| Thermal correction to Energy=                | 0.519620     |
| Thermal correction to Enthalpy=              | 0.520565     |
| Thermal correction to Gibbs Free Energy=     | 0.435349     |
| Sum of electronic and zero-point Energies=   | -1184.406057 |
| Sum of electronic and thermal Energies=      | -1184.378846 |
| Sum of electronic and thermal Enthalpies=    | -1184.377902 |
| Sum of electronic and thermal Free Energies= | -1184.463118 |

Esol =-1185.3191647

---

| Center<br>Number | Atomic<br>Number | Atomic<br>Type | Coordinates (Angstroms) |           |           |
|------------------|------------------|----------------|-------------------------|-----------|-----------|
|                  |                  |                | X                       | Y         | Z         |
| 1                | 6                | 0              | 2.518064                | -1.193152 | -1.308833 |

|    |   |   |           |           |           |
|----|---|---|-----------|-----------|-----------|
| 2  | 6 | 0 | 3.009760  | -1.561510 | 0.126391  |
| 3  | 5 | 0 | 0.960369  | -0.490179 | 0.245475  |
| 4  | 8 | 0 | 1.529920  | -0.198794 | -1.053766 |
| 5  | 8 | 0 | 1.809539  | -1.470305 | 0.888597  |
| 6  | 6 | 0 | 3.565156  | -2.973269 | 0.262220  |
| 7  | 1 | 0 | 4.414738  | -3.127940 | -0.411839 |
| 8  | 1 | 0 | 3.907843  | -3.137129 | 1.287899  |
| 9  | 1 | 0 | 2.794995  | -3.713024 | 0.038521  |
| 10 | 6 | 0 | 1.827444  | -2.373524 | -1.997131 |
| 11 | 1 | 0 | 1.320451  | -2.002921 | -2.891661 |
| 12 | 1 | 0 | 2.539039  | -3.151029 | -2.292277 |
| 13 | 1 | 0 | 1.070525  | -2.807121 | -1.337370 |
| 14 | 6 | 0 | 3.591452  | -0.608309 | -2.216604 |
| 15 | 1 | 0 | 4.413324  | -1.318348 | -2.358242 |
| 16 | 1 | 0 | 3.160474  | -0.384976 | -3.196443 |
| 17 | 1 | 0 | 3.995563  | 0.318165  | -1.802670 |
| 18 | 6 | 0 | 4.030085  | -0.552471 | 0.666163  |
| 19 | 1 | 0 | 4.129694  | -0.702064 | 1.745003  |
| 20 | 1 | 0 | 5.013499  | -0.683202 | 0.203510  |
| 21 | 1 | 0 | 3.701222  | 0.475694  | 0.490603  |
| 22 | 6 | 0 | -2.755679 | -1.800033 | -0.094760 |
| 23 | 6 | 0 | -2.730854 | -1.284749 | 1.377355  |
| 24 | 5 | 0 | -0.706828 | -0.908605 | 0.380704  |
| 25 | 8 | 0 | -1.358984 | -1.808846 | -0.438361 |
| 26 | 8 | 0 | -1.551097 | -0.458360 | 1.388316  |
| 27 | 6 | 0 | -3.933186 | -0.447188 | 1.784101  |
| 28 | 1 | 0 | -4.856046 | -1.030150 | 1.697375  |
| 29 | 1 | 0 | -3.824822 | -0.132000 | 2.825198  |
| 30 | 1 | 0 | -4.021522 | 0.446406  | 1.164371  |
| 31 | 6 | 0 | -3.444725 | -0.825800 | -1.050068 |
| 32 | 1 | 0 | -3.234061 | -1.136072 | -2.076076 |
| 33 | 1 | 0 | -4.528503 | -0.811788 | -0.901761 |
| 34 | 1 | 0 | -3.056286 | 0.187428  | -0.913607 |
| 35 | 6 | 0 | -3.321097 | -3.200682 | -0.272993 |
| 36 | 1 | 0 | -4.360794 | -3.244499 | 0.068163  |
| 37 | 1 | 0 | -3.295651 | -3.471524 | -1.331447 |
| 38 | 1 | 0 | -2.735769 | -3.936483 | 0.280364  |
| 39 | 6 | 0 | -2.497424 | -2.405836 | 2.389979  |
| 40 | 1 | 0 | -2.284069 | -1.959619 | 3.364631  |
| 41 | 1 | 0 | -3.374390 | -3.052248 | 2.486804  |
| 42 | 1 | 0 | -1.638376 | -3.015849 | 2.096656  |
| 43 | 6 | 0 | 1.415064  | 2.105741  | 0.504290  |
| 44 | 6 | 0 | 1.530089  | 3.301263  | 1.198367  |
| 45 | 6 | 0 | 1.054844  | 2.062065  | 3.212229  |

|    |   |   |          |           |           |
|----|---|---|----------|-----------|-----------|
| 46 | 6 | 0 | 0.952086 | 0.926449  | 2.441487  |
| 47 | 1 | 0 | 1.562543 | 2.027004  | -0.568189 |
| 48 | 1 | 0 | 1.762007 | 4.209265  | 0.658323  |
| 49 | 1 | 0 | 0.913243 | 2.033901  | 4.285169  |
| 50 | 7 | 0 | 1.132784 | 0.953253  | 1.111477  |
| 51 | 1 | 0 | 0.722664 | -0.048750 | 2.856241  |
| 52 | 6 | 0 | 1.347853 | 3.280874  | 2.584196  |
| 53 | 6 | 0 | 1.726472 | 5.606380  | 2.782213  |
| 54 | 1 | 0 | 1.746184 | 6.330998  | 3.594109  |
| 55 | 1 | 0 | 2.702672 | 5.584257  | 2.286452  |
| 56 | 1 | 0 | 0.953124 | 5.886258  | 2.059160  |
| 57 | 8 | 0 | 1.432704 | 4.356300  | 3.382450  |

## TSH2

|                                              |              |
|----------------------------------------------|--------------|
| Thermal correction to Energy=                | 0.650917     |
| Thermal correction to Enthalpy=              | 0.651861     |
| Thermal correction to Gibbs Free Energy=     | 0.550936     |
| Sum of electronic and zero-point Energies=   | -1546.958107 |
| Sum of electronic and thermal Energies=      | -1546.923509 |
| Sum of electronic and thermal Enthalpies=    | -1546.922565 |
| Sum of electronic and thermal Free Energies= | -1547.023490 |

Esol = -1548.1197899

| Center<br>Number | Atomic<br>Number | Atomic<br>Type | Coordinates (Angstroms) |           |           |
|------------------|------------------|----------------|-------------------------|-----------|-----------|
|                  |                  |                | X                       | Y         | Z         |
| 1                | 6                | 0              | -1.875863               | 0.743710  | 2.710540  |
| 2                | 6                | 0              | -2.918648               | 1.414486  | 0.643140  |
| 3                | 6                | 0              | -0.660748               | 0.773228  | 2.042837  |
| 4                | 1                | 0              | -1.899759               | 0.468069  | 3.756144  |
| 5                | 6                | 0              | -1.667640               | 1.427285  | 0.064637  |
| 6                | 1                | 0              | -3.807979               | 1.662221  | 0.076832  |
| 7                | 1                | 0              | 0.273752                | 0.501194  | 2.522081  |
| 8                | 1                | 0              | -1.489442               | 1.689786  | -0.973275 |
| 9                | 7                | 0              | -0.562591               | 1.105169  | 0.754427  |
| 10               | 6                | 0              | 2.286932                | -2.383700 | 1.396237  |
| 11               | 6                | 0              | 2.725631                | -2.550748 | -0.092624 |
| 12               | 5                | 0              | 1.347635                | -0.727294 | 0.111937  |
| 13               | 8                | 0              | 1.169833                | -1.490906 | 1.294502  |
| 14               | 8                | 0              | 2.377551                | -1.280914 | -0.654264 |
| 15               | 6                | 0              | 4.218334                | -2.776897 | -0.291348 |

|    |   |   |           |           |           |
|----|---|---|-----------|-----------|-----------|
| 16 | 1 | 0 | 4.549133  | -3.684180 | 0.225757  |
| 17 | 1 | 0 | 4.429733  | -2.894018 | -1.357602 |
| 18 | 1 | 0 | 4.795114  | -1.927346 | 0.077787  |
| 19 | 6 | 0 | 3.347039  | -1.669193 | 2.237376  |
| 20 | 1 | 0 | 2.911327  | -1.418161 | 3.208371  |
| 21 | 1 | 0 | 4.230716  | -2.292583 | 2.403006  |
| 22 | 1 | 0 | 3.647962  | -0.737087 | 1.749698  |
| 23 | 6 | 0 | 1.845710  | -3.669515 | 2.079473  |
| 24 | 1 | 0 | 2.663454  | -4.397626 | 2.104470  |
| 25 | 1 | 0 | 1.549925  | -3.454255 | 3.110124  |
| 26 | 1 | 0 | 0.993615  | -4.117881 | 1.564480  |
| 27 | 6 | 0 | 1.935328  | -3.637506 | -0.823517 |
| 28 | 1 | 0 | 2.118229  | -3.534914 | -1.896495 |
| 29 | 1 | 0 | 2.245768  | -4.639036 | -0.509400 |
| 30 | 1 | 0 | 0.862933  | -3.525654 | -0.650905 |
| 31 | 6 | 0 | 2.041286  | 2.987613  | -0.009875 |
| 32 | 6 | 0 | 1.773744  | 2.527510  | -1.477735 |
| 33 | 5 | 0 | 0.949204  | 0.942045  | -0.003954 |
| 34 | 8 | 0 | 1.887519  | 1.776359  | 0.719143  |
| 35 | 8 | 0 | 0.750157  | 1.550114  | -1.314618 |
| 36 | 6 | 0 | 1.272106  | 3.625902  | -2.405486 |
| 37 | 1 | 0 | 2.001753  | 4.439402  | -2.480104 |
| 38 | 1 | 0 | 1.115460  | 3.216706  | -3.407746 |
| 39 | 1 | 0 | 0.323518  | 4.036902  | -2.052655 |
| 40 | 6 | 0 | 1.002378  | 4.006153  | 0.474187  |
| 41 | 1 | 0 | 1.074118  | 4.083506  | 1.562711  |
| 42 | 1 | 0 | 1.171029  | 4.997640  | 0.041574  |
| 43 | 1 | 0 | -0.011999 | 3.686246  | 0.219295  |
| 44 | 6 | 0 | 3.443557  | 3.529371  | 0.236557  |
| 45 | 1 | 0 | 3.654778  | 4.388384  | -0.409878 |
| 46 | 1 | 0 | 3.534735  | 3.853474  | 1.277288  |
| 47 | 1 | 0 | 4.190806  | 2.755134  | 0.055127  |
| 48 | 6 | 0 | 2.993398  | 1.831672  | -2.088378 |
| 49 | 1 | 0 | 2.688189  | 1.356271  | -3.024914 |
| 50 | 1 | 0 | 3.804169  | 2.535191  | -2.302723 |
| 51 | 1 | 0 | 3.355578  | 1.047196  | -1.417837 |
| 52 | 6 | 0 | -1.481778 | -1.888139 | -0.147185 |
| 53 | 6 | 0 | -2.798560 | -1.935246 | -0.566306 |
| 54 | 6 | 0 | -2.077891 | -0.948009 | -2.641164 |
| 55 | 6 | 0 | -0.786451 | -0.943269 | -2.116389 |
| 56 | 1 | 0 | -1.178222 | -2.229778 | 0.840893  |
| 57 | 1 | 0 | -3.590089 | -2.323561 | 0.063688  |
| 58 | 1 | 0 | -2.253883 | -0.557758 | -3.635211 |
| 59 | 7 | 0 | -0.490640 | -1.403266 | -0.904401 |



|    |   |   |           |           |           |
|----|---|---|-----------|-----------|-----------|
| 60 | 1 | 0 | 0.044856  | -0.517773 | -2.671659 |
| 61 | 6 | 0 | -3.033240 | 1.064971  | 1.994825  |
| 62 | 6 | 0 | -3.107118 | -1.453678 | -1.844820 |
| 63 | 6 | 0 | -4.425469 | 0.718037  | 3.874144  |
| 64 | 1 | 0 | -5.491943 | 0.779529  | 4.083363  |
| 65 | 1 | 0 | -4.072655 | -0.301320 | 4.063975  |
| 66 | 1 | 0 | -3.884375 | 1.418713  | 4.518858  |
| 67 | 6 | 0 | -4.744122 | -1.036703 | -3.498345 |
| 68 | 1 | 0 | -5.819711 | -1.174418 | -3.597530 |
| 69 | 1 | 0 | -4.499889 | 0.025981  | -3.607401 |
| 70 | 1 | 0 | -4.228584 | -1.608426 | -4.277775 |
| 71 | 8 | 0 | -4.275029 | 1.062830  | 2.508189  |
| 72 | 8 | 0 | -4.405181 | -1.509589 | -2.208851 |

---

## IntH2

|                                              |              |
|----------------------------------------------|--------------|
| Thermal correction to Energy=                | 0.651876     |
| Thermal correction to Enthalpy=              | 0.652821     |
| Thermal correction to Gibbs Free Energy=     | 0.551729     |
| Sum of electronic and zero-point Energies=   | -1546.962122 |
| Sum of electronic and thermal Energies=      | -1546.927325 |
| Sum of electronic and thermal Enthalpies=    | -1546.926381 |
| Sum of electronic and thermal Free Energies= | -1547.027472 |

Esol =-1548.1238507

---

| Center<br>Number | Atomic<br>Number | Atomic<br>Type | Coordinates (Angstroms) |           |           |
|------------------|------------------|----------------|-------------------------|-----------|-----------|
|                  |                  |                | X                       | Y         | Z         |
| 1                | 6                | 0              | -0.858393               | 2.111077  | -3.177429 |
| 2                | 6                | 0              | -1.594151               | 3.399905  | -1.276849 |
| 3                | 6                | 0              | -0.827112               | 1.002420  | -2.345747 |
| 4                | 1                | 0              | -0.579797               | 2.002126  | -4.216828 |
| 5                | 6                | 0              | -1.543094               | 2.243939  | -0.526556 |
| 6                | 1                | 0              | -1.899744               | 4.344409  | -0.844123 |
| 7                | 1                | 0              | -0.520723               | 0.019597  | -2.686916 |
| 8                | 1                | 0              | -1.808098               | 2.200298  | 0.525780  |
| 9                | 7                | 0              | -1.163763               | 1.070058  | -1.055165 |
| 10               | 6                | 0              | 2.488504                | -1.214915 | -1.275574 |
| 11               | 6                | 0              | 2.678694                | -1.711123 | 0.192624  |
| 12               | 5                | 0              | 0.862717                | -0.278276 | 0.084049  |
| 13               | 8                | 0              | 1.679148                | -0.054586 | -1.110303 |
| 14               | 8                | 0              | 1.412112                | -1.426447 | 0.773736  |

|    |   |   |           |           |           |
|----|---|---|-----------|-----------|-----------|
| 15 | 6 | 0 | 2.950369  | -3.203709 | 0.326553  |
| 16 | 1 | 0 | 3.848787  | -3.494194 | -0.229261 |
| 17 | 1 | 0 | 3.102923  | -3.456422 | 1.379853  |
| 18 | 1 | 0 | 2.100536  | -3.781047 | -0.041479 |
| 19 | 6 | 0 | 1.695982  | -2.221805 | -2.115226 |
| 20 | 1 | 0 | 1.444844  | -1.751980 | -3.071811 |
| 21 | 1 | 0 | 2.270081  | -3.130336 | -2.323099 |
| 22 | 1 | 0 | 0.763032  | -2.483289 | -1.605469 |
| 23 | 6 | 0 | 3.778907  | -0.830417 | -1.986942 |
| 24 | 1 | 0 | 4.461003  | -1.685118 | -2.051628 |
| 25 | 1 | 0 | 3.552147  | -0.498791 | -3.004442 |
| 26 | 1 | 0 | 4.286109  | -0.014015 | -1.468511 |
| 27 | 6 | 0 | 3.764119  | -0.916596 | 0.928778  |
| 28 | 1 | 0 | 3.670848  | -1.112860 | 2.000829  |
| 29 | 1 | 0 | 4.770058  | -1.205955 | 0.607815  |
| 30 | 1 | 0 | 3.643124  | 0.157825  | 0.763032  |
| 31 | 6 | 0 | -2.680610 | -1.712959 | -0.192277 |
| 32 | 6 | 0 | -2.490748 | -1.215882 | 1.275672  |
| 33 | 5 | 0 | -0.865562 | -0.278879 | -0.084421 |
| 34 | 8 | 0 | -1.414211 | -1.427754 | -0.773529 |
| 35 | 8 | 0 | -1.682135 | -0.055119 | 1.109818  |
| 36 | 6 | 0 | -3.781399 | -0.831851 | 1.986839  |
| 37 | 1 | 0 | -4.462939 | -1.686961 | 2.051974  |
| 38 | 1 | 0 | -3.554855 | -0.499544 | 3.004165  |
| 39 | 1 | 0 | -4.289134 | -0.016052 | 1.467981  |
| 40 | 6 | 0 | -3.766544 | -0.919514 | -0.928846 |
| 41 | 1 | 0 | -3.673133 | -1.116264 | -2.000796 |
| 42 | 1 | 0 | -4.772299 | -1.209361 | -0.607745 |
| 43 | 1 | 0 | -3.646248 | 0.155070  | -0.763652 |
| 44 | 6 | 0 | -2.951313 | -3.205788 | -0.325453 |
| 45 | 1 | 0 | -3.849550 | -3.496576 | 0.230495  |
| 46 | 1 | 0 | -3.103686 | -3.459133 | -1.378626 |
| 47 | 1 | 0 | -2.101110 | -3.782387 | 0.042883  |
| 48 | 6 | 0 | -1.697578 | -2.221831 | 2.115842  |
| 49 | 1 | 0 | -1.446734 | -1.751348 | 3.072180  |
| 50 | 1 | 0 | -2.271094 | -3.130622 | 2.324190  |
| 51 | 1 | 0 | -0.764465 | -2.482982 | 1.606214  |
| 52 | 6 | 0 | 1.538419  | 2.245237  | 0.524920  |
| 53 | 6 | 0 | 1.588682  | 3.401599  | 1.274656  |
| 54 | 6 | 0 | 0.854083  | 2.113121  | 3.175923  |
| 55 | 6 | 0 | 0.823543  | 1.004049  | 2.344769  |
| 56 | 1 | 0 | 1.803348  | 2.201302  | -0.527423 |
| 57 | 1 | 0 | 1.893514  | 4.346125  | 0.841443  |
| 58 | 1 | 0 | 0.575654  | 2.004458  | 4.215397  |

|    |   |   |           |          |           |
|----|---|---|-----------|----------|-----------|
| 59 | 7 | 0 | 1.160029  | 1.071324 | 1.054124  |
| 60 | 1 | 0 | 0.517930  | 0.021155 | 2.686430  |
| 61 | 6 | 0 | -1.245591 | 3.339280 | -2.632345 |
| 62 | 6 | 0 | 1.240320  | 3.341355 | 2.630221  |
| 63 | 6 | 0 | -0.968232 | 4.466250 | -4.692522 |
| 64 | 1 | 0 | -1.086458 | 5.486898 | -5.052178 |
| 65 | 1 | 0 | 0.069391  | 4.145392 | -4.834023 |
| 66 | 1 | 0 | -1.636034 | 3.801453 | -5.250697 |
| 67 | 6 | 0 | 0.962248  | 4.469135 | 4.689879  |
| 68 | 1 | 0 | 1.079812  | 5.490032 | 5.049043  |
| 69 | 1 | 0 | -0.075151 | 4.147647 | 4.831588  |
| 70 | 1 | 0 | 1.630523  | 3.805051 | 5.248338  |
| 71 | 8 | 0 | -1.309916 | 4.494530 | -3.317959 |
| 72 | 8 | 0 | 1.303845  | 4.496988 | 3.315283  |

---

### TSH3

|                                              |              |
|----------------------------------------------|--------------|
| Thermal correction to Energy=                | 0.651016     |
| Thermal correction to Enthalpy=              | 0.651960     |
| Thermal correction to Gibbs Free Energy=     | 0.554932     |
| Sum of electronic and zero-point Energies=   | -1546.929055 |
| Sum of electronic and thermal Energies=      | -1546.895240 |
| Sum of electronic and thermal Enthalpies=    | -1546.894295 |
| Sum of electronic and thermal Free Energies= | -1546.991323 |

Esol =-1548.088159

---

| Center<br>Number | Atomic<br>Number | Atomic<br>Type | Coordinates (Angstroms) |           |           |
|------------------|------------------|----------------|-------------------------|-----------|-----------|
|                  |                  |                | X                       | Y         | Z         |
| 1                | 6                | 0              | -1.506402               | -3.080084 | 0.990322  |
| 2                | 6                | 0              | -2.991720               | -1.200520 | 1.166886  |
| 3                | 6                | 0              | -0.447679               | -2.228617 | 1.048643  |
| 4                | 1                | 0              | -1.310562               | -4.142392 | 0.926321  |
| 5                | 6                | 0              | -1.878171               | -0.345935 | 1.137105  |
| 6                | 1                | 0              | -3.987531               | -0.775948 | 1.225115  |
| 7                | 1                | 0              | 0.580644                | -2.566373 | 1.046206  |
| 8                | 1                | 0              | -1.949370               | 0.702622  | 1.402830  |
| 9                | 7                | 0              | -0.600931               | -0.862905 | 1.157763  |
| 10               | 6                | 0              | 1.704661                | -1.712921 | -2.155517 |
| 11               | 6                | 0              | 2.374793                | -0.329901 | -2.461804 |
| 12               | 5                | 0              | 0.580349                | -0.022221 | -1.108226 |
| 13               | 8                | 0              | 0.434086                | -1.331799 | -1.605036 |

|    |   |   |           |           |           |
|----|---|---|-----------|-----------|-----------|
| 14 | 8 | 0 | 1.847162  | 0.512939  | -1.426849 |
| 15 | 6 | 0 | 3.891660  | -0.325583 | -2.365393 |
| 16 | 1 | 0 | 4.329896  | -1.034802 | -3.075376 |
| 17 | 1 | 0 | 4.270487  | 0.672995  | -2.600214 |
| 18 | 1 | 0 | 4.213681  | -0.587681 | -1.355843 |
| 19 | 6 | 0 | 2.468159  | -2.510410 | -1.099464 |
| 20 | 1 | 0 | 1.856988  | -3.370694 | -0.809362 |
| 21 | 1 | 0 | 3.417606  | -2.886394 | -1.492947 |
| 22 | 1 | 0 | 2.657230  | -1.897670 | -0.213380 |
| 23 | 6 | 0 | 1.457319  | -2.575375 | -3.385219 |
| 24 | 1 | 0 | 2.399463  | -2.798591 | -3.897048 |
| 25 | 1 | 0 | 1.001563  | -3.521219 | -3.080214 |
| 26 | 1 | 0 | 0.781694  | -2.082128 | -4.085796 |
| 27 | 6 | 0 | 1.916963  | 0.252555  | -3.799936 |
| 28 | 1 | 0 | 2.251985  | 1.291164  | -3.861534 |
| 29 | 1 | 0 | 2.331148  | -0.299133 | -4.648913 |
| 30 | 1 | 0 | 0.824796  | 0.239147  | -3.871607 |
| 31 | 6 | 0 | 2.375072  | 0.329392  | 2.461631  |
| 32 | 6 | 0 | 1.704956  | 1.712536  | 2.155633  |
| 33 | 5 | 0 | 0.580182  | 0.022045  | 1.108437  |
| 34 | 8 | 0 | 1.846757  | -0.513554 | 1.427137  |
| 35 | 8 | 0 | 0.434293  | 1.331658  | 1.605217  |
| 36 | 6 | 0 | 1.457765  | 2.574747  | 3.385553  |
| 37 | 1 | 0 | 2.399995  | 2.798093  | 3.897168  |
| 38 | 1 | 0 | 1.001726  | 3.520533  | 3.080795  |
| 39 | 1 | 0 | 0.782426  | 2.081271  | 4.086238  |
| 40 | 6 | 0 | 1.918005  | -0.252928 | 3.800080  |
| 41 | 1 | 0 | 2.253225  | -1.291474 | 3.861661  |
| 42 | 1 | 0 | 2.332501  | 0.298938  | 4.648787  |
| 43 | 1 | 0 | 0.825869  | -0.239704 | 3.872255  |
| 44 | 6 | 0 | 3.891880  | 0.324839  | 2.364253  |
| 45 | 1 | 0 | 4.330713  | 1.033940  | 3.073984  |
| 46 | 1 | 0 | 4.270672  | -0.673824 | 2.598769  |
| 47 | 1 | 0 | 4.213254  | 0.586923  | 1.354491  |
| 48 | 6 | 0 | 2.468340  | 2.510382  | 1.099762  |
| 49 | 1 | 0 | 1.857496  | 3.371234  | 0.810636  |
| 50 | 1 | 0 | 3.418173  | 2.885592  | 1.493044  |
| 51 | 1 | 0 | 2.656664  | 1.898345  | 0.213032  |
| 52 | 6 | 0 | -1.877876 | 0.346356  | -1.137648 |
| 53 | 6 | 0 | -2.991237 | 1.201174  | -1.167596 |
| 54 | 6 | 0 | -1.505580 | 3.080389  | -0.990055 |
| 55 | 6 | 0 | -0.447017 | 2.228714  | -1.048338 |
| 56 | 1 | 0 | -1.949201 | -0.702127 | -1.403632 |
| 57 | 1 | 0 | -3.987114 | 0.776829  | -1.226325 |

|    |   |   |           |           |           |
|----|---|---|-----------|-----------|-----------|
| 58 | 1 | 0 | -1.309556 | 4.142651  | -0.925829 |
| 59 | 7 | 0 | -0.600515 | 0.863064  | -1.157814 |
| 60 | 1 | 0 | 0.581369  | 2.566278  | -1.045608 |
| 61 | 6 | 0 | -2.832174 | -2.559874 | 1.054042  |
| 62 | 6 | 0 | -2.831438 | 2.560459  | -1.054251 |
| 63 | 8 | 0 | -3.952337 | 3.331265  | -1.020923 |
| 64 | 6 | 0 | -3.780490 | 4.729269  | -0.955156 |
| 65 | 1 | 0 | -4.782256 | 5.158156  | -0.949506 |
| 66 | 1 | 0 | -3.255878 | 5.028272  | -0.039527 |
| 67 | 1 | 0 | -3.231089 | 5.109214  | -1.825202 |
| 68 | 8 | 0 | -3.953238 | -3.330432 | 1.020448  |
| 69 | 6 | 0 | -3.781745 | -4.728551 | 0.956092  |
| 70 | 1 | 0 | -4.783620 | -5.157184 | 0.950570  |
| 71 | 1 | 0 | -3.256946 | -5.028586 | 0.040902  |
| 72 | 1 | 0 | -3.232712 | -5.107794 | 1.826661  |

---

### IntH3

|                                              |              |
|----------------------------------------------|--------------|
| Thermal correction to Energy=                | 0.654745     |
| Thermal correction to Enthalpy=              | 0.655689     |
| Thermal correction to Gibbs Free Energy=     | 0.556269     |
| Sum of electronic and zero-point Energies=   | -1546.995513 |
| Sum of electronic and thermal Energies=      | -1546.961186 |
| Sum of electronic and thermal Enthalpies=    | -1546.960241 |
| Sum of electronic and thermal Free Energies= | -1547.059662 |

Esol = -1548.1627143

---

| Center<br>Number | Atomic<br>Number | Atomic<br>Type | Coordinates (Angstroms) |           |           |
|------------------|------------------|----------------|-------------------------|-----------|-----------|
|                  |                  |                | X                       | Y         | Z         |
| 1                | 6                | 0              | -1.173278               | 2.940352  | 0.002975  |
| 2                | 6                | 0              | -2.248650               | 0.901916  | -0.775161 |
| 3                | 6                | 0              | 0.037850                | 2.393711  | -0.216192 |
| 4                | 1                | 0              | -1.244569               | 3.944208  | 0.397612  |
| 5                | 6                | 0              | -0.949478               | 0.188675  | -0.521262 |
| 6                | 1                | 0              | -3.105109               | 0.361274  | -1.158066 |
| 7                | 1                | 0              | 0.962440                | 2.941157  | -0.066963 |
| 8                | 1                | 0              | -0.815233               | -0.645959 | -1.216460 |
| 9                | 7                | 0              | 0.183766                | 1.104510  | -0.705498 |
| 10               | 6                | 0              | 2.443255                | 1.390898  | 3.023530  |
| 11               | 6                | 0              | 3.298927                | 0.078149  | 3.053418  |
| 12               | 5                | 0              | 1.385485                | -0.267019 | 1.906065  |
| 13               | 8                | 0              | 1.159518                | 0.915021  | 2.568593  |

|    |   |   |           |           |           |
|----|---|---|-----------|-----------|-----------|
| 14 | 8 | 0 | 2.688784  | -0.713413 | 2.013223  |
| 15 | 6 | 0 | 4.769370  | 0.268434  | 2.722827  |
| 16 | 1 | 0 | 5.246238  | 0.927324  | 3.455491  |
| 17 | 1 | 0 | 5.277319  | -0.699085 | 2.748813  |
| 18 | 1 | 0 | 4.895886  | 0.699712  | 1.728230  |
| 19 | 6 | 0 | 2.948377  | 2.401733  | 1.998126  |
| 20 | 1 | 0 | 2.209764  | 3.203245  | 1.913190  |
| 21 | 1 | 0 | 3.899483  | 2.842479  | 2.311178  |
| 22 | 1 | 0 | 3.073471  | 1.943039  | 1.011822  |
| 23 | 6 | 0 | 2.259859  | 2.058372  | 4.377538  |
| 24 | 1 | 0 | 3.227432  | 2.358567  | 4.792725  |
| 25 | 1 | 0 | 1.645624  | 2.954305  | 4.258876  |
| 26 | 1 | 0 | 1.760919  | 1.394384  | 5.084660  |
| 27 | 6 | 0 | 3.139581  | -0.702713 | 4.356478  |
| 28 | 1 | 0 | 3.590838  | -1.689856 | 4.231464  |
| 29 | 1 | 0 | 3.630829  | -0.195842 | 5.191419  |
| 30 | 1 | 0 | 2.081922  | -0.838147 | 4.601061  |
| 31 | 6 | 0 | 3.453247  | 0.829230  | -2.223156 |
| 32 | 6 | 0 | 2.948363  | -0.653078 | -2.285740 |
| 33 | 5 | 0 | 1.406211  | 0.664683  | -1.285150 |
| 34 | 8 | 0 | 2.561768  | 1.420601  | -1.255984 |
| 35 | 8 | 0 | 1.547584  | -0.519035 | -1.968257 |
| 36 | 6 | 0 | 3.076592  | -1.306563 | -3.652646 |
| 37 | 1 | 0 | 4.125947  | -1.345512 | -3.962656 |
| 38 | 1 | 0 | 2.695849  | -2.329459 | -3.602186 |
| 39 | 1 | 0 | 2.504204  | -0.766510 | -4.408108 |
| 40 | 6 | 0 | 3.245765  | 1.581120  | -3.536265 |
| 41 | 1 | 0 | 3.425643  | 2.644857  | -3.364184 |
| 42 | 1 | 0 | 3.931753  | 1.230411  | -4.312060 |
| 43 | 1 | 0 | 2.219405  | 1.460861  | -3.895312 |
| 44 | 6 | 0 | 4.882688  | 0.994408  | -1.735454 |
| 45 | 1 | 0 | 5.580080  | 0.491998  | -2.413466 |
| 46 | 1 | 0 | 5.138451  | 2.056733  | -1.705486 |
| 47 | 1 | 0 | 5.008061  | 0.579882  | -0.733293 |
| 48 | 6 | 0 | 3.577967  | -1.536407 | -1.212865 |
| 49 | 1 | 0 | 3.055670  | -2.496861 | -1.207749 |
| 50 | 1 | 0 | 4.636108  | -1.721021 | -1.420016 |
| 51 | 1 | 0 | 3.481535  | -1.086158 | -0.219374 |
| 52 | 6 | 0 | -0.934849 | -0.403046 | 0.923484  |
| 53 | 6 | 0 | -2.022995 | -1.430689 | 1.074181  |
| 54 | 6 | 0 | -0.394198 | -3.115879 | 0.423923  |
| 55 | 6 | 0 | 0.611164  | -2.277507 | 0.739526  |
| 56 | 1 | 0 | -1.080662 | 0.430579  | 1.617639  |
| 57 | 1 | 0 | -3.019409 | -1.132698 | 1.375183  |

|    |   |   |           |           |           |
|----|---|---|-----------|-----------|-----------|
| 58 | 1 | 0 | -0.169963 | -4.102089 | 0.042068  |
| 59 | 7 | 0 | 0.376798  | -0.996813 | 1.217031  |
| 60 | 1 | 0 | 1.654446  | -2.569343 | 0.683956  |
| 61 | 6 | 0 | -2.356186 | 2.193464  | -0.421140 |
| 62 | 6 | 0 | -1.762046 | -2.703272 | 0.732734  |
| 63 | 6 | 0 | -3.612867 | 4.210904  | -0.564726 |
| 64 | 1 | 0 | -4.634698 | 4.478096  | -0.836511 |
| 65 | 1 | 0 | -3.380475 | 4.662581  | 0.407459  |
| 66 | 1 | 0 | -2.922693 | 4.608011  | -1.317930 |
| 67 | 6 | 0 | -2.456931 | -4.977945 | 0.834346  |
| 68 | 1 | 0 | -3.394058 | -5.500537 | 1.029904  |
| 69 | 1 | 0 | -2.027004 | -5.368341 | -0.096046 |
| 70 | 1 | 0 | -1.759093 | -5.166991 | 1.658163  |
| 71 | 8 | 0 | -3.576846 | 2.801424  | -0.512272 |
| 72 | 8 | 0 | -2.785532 | -3.609500 | 0.729670  |

#### TSH4

|                                              |              |
|----------------------------------------------|--------------|
| Thermal correction to Energy=                | 0.649475     |
| Thermal correction to Enthalpy=              | 0.650419     |
| Thermal correction to Gibbs Free Energy=     | 0.548783     |
| Sum of electronic and zero-point Energies=   | -1546.935882 |
| Sum of electronic and thermal Energies=      | -1546.900957 |
| Sum of electronic and thermal Enthalpies=    | -1546.900013 |
| Sum of electronic and thermal Free Energies= | -1547.001648 |

Esol = -1548.0988307

| Center<br>Number | Atomic<br>Number | Atomic<br>Type | Coordinates (Angstroms) |           |           |
|------------------|------------------|----------------|-------------------------|-----------|-----------|
|                  |                  |                | X                       | Y         | Z         |
| 1                | 6                | 0              | 1.785982                | -0.715603 | -3.162563 |
| 2                | 6                | 0              | 3.256995                | 0.457412  | -1.654194 |
| 3                | 6                | 0              | 0.717373                | -0.218348 | -2.495031 |
| 4                | 1                | 0              | 1.600627                | -1.357547 | -4.014717 |
| 5                | 6                | 0              | 2.159160                | 0.867853  | -0.911073 |
| 6                | 1                | 0              | 4.252254                | 0.723628  | -1.314662 |
| 7                | 1                | 0              | -0.301506               | -0.406202 | -2.803984 |
| 8                | 1                | 0              | 2.229121                | 1.594089  | -0.112356 |
| 9                | 7                | 0              | 0.851613                | 0.635416  | -1.392788 |
| 10               | 6                | 0              | -1.490407               | -2.854167 | -0.287583 |
| 11               | 6                | 0              | -2.296039               | -2.295391 | 0.938903  |
| 12               | 5                | 0              | -0.267410               | -1.320568 | 0.845236  |

|    |   |   |           |           |           |
|----|---|---|-----------|-----------|-----------|
| 13 | 8 | 0 | -0.156082 | -2.366334 | -0.040597 |
| 14 | 8 | 0 | -1.561138 | -1.102972 | 1.285647  |
| 15 | 6 | 0 | -3.733701 | -1.914454 | 0.629961  |
| 16 | 1 | 0 | -4.304877 | -2.794183 | 0.316497  |
| 17 | 1 | 0 | -4.202950 | -1.503127 | 1.528079  |
| 18 | 1 | 0 | -3.780140 | -1.163848 | -0.160752 |
| 19 | 6 | 0 | -1.963174 | -2.273859 | -1.616501 |
| 20 | 1 | 0 | -1.236506 | -2.545620 | -2.386748 |
| 21 | 1 | 0 | -2.939018 | -2.680452 | -1.898824 |
| 22 | 1 | 0 | -2.032600 | -1.183235 | -1.565356 |
| 23 | 6 | 0 | -1.438644 | -4.372667 | -0.368349 |
| 24 | 1 | 0 | -2.447209 | -4.787437 | -0.464611 |
| 25 | 1 | 0 | -0.861848 | -4.667323 | -1.248474 |
| 26 | 1 | 0 | -0.960096 | -4.803278 | 0.512226  |
| 27 | 6 | 0 | -2.235917 | -3.216397 | 2.156629  |
| 28 | 1 | 0 | -2.648064 | -2.686463 | 3.018669  |
| 29 | 1 | 0 | -2.813350 | -4.131329 | 1.999357  |
| 30 | 1 | 0 | -1.201477 | -3.489272 | 2.386457  |
| 31 | 6 | 0 | -2.306774 | 2.290332  | -0.924919 |
| 32 | 6 | 0 | -1.494709 | 2.850756  | 0.296542  |
| 33 | 5 | 0 | -0.275582 | 1.319759  | -0.843920 |
| 34 | 8 | 0 | -1.571598 | 1.099390  | -1.276169 |
| 35 | 8 | 0 | -0.160906 | 2.365824  | 0.041138  |
| 36 | 6 | 0 | -1.445733 | 4.369352  | 0.377147  |
| 37 | 1 | 0 | -2.454581 | 4.781923  | 0.479687  |
| 38 | 1 | 0 | -0.864146 | 4.665183  | 1.253718  |
| 39 | 1 | 0 | -0.973577 | 4.801076  | -0.506330 |
| 40 | 6 | 0 | -2.256025 | 3.211442  | -2.142993 |
| 41 | 1 | 0 | -2.672356 | 2.680648  | -3.002490 |
| 42 | 1 | 0 | -2.834375 | 4.125179  | -1.982180 |
| 43 | 1 | 0 | -1.223580 | 3.486457  | -2.379156 |
| 44 | 6 | 0 | -3.741728 | 1.906505  | -0.607105 |
| 45 | 1 | 0 | -4.312720 | 2.785091  | -0.290117 |
| 46 | 1 | 0 | -4.215694 | 1.494231  | -1.502307 |
| 47 | 1 | 0 | -3.781785 | 1.155818  | 0.183877  |
| 48 | 6 | 0 | -1.957883 | 2.269241  | 1.628307  |
| 49 | 1 | 0 | -1.226934 | 2.542359  | 2.394009  |
| 50 | 1 | 0 | -2.932777 | 2.673733  | 1.916860  |
| 51 | 1 | 0 | -2.025347 | 1.178487  | 1.577299  |
| 52 | 6 | 0 | 2.166731  | -0.863417 | 0.897122  |
| 53 | 6 | 0 | 3.268323  | -0.450638 | 1.633359  |
| 54 | 6 | 0 | 1.804268  | 0.719053  | 3.151061  |
| 55 | 6 | 0 | 0.732568  | 0.219526  | 2.490217  |
| 56 | 1 | 0 | 2.233246  | -1.589448 | 0.097925  |



|    |   |   |           |           |           |
|----|---|---|-----------|-----------|-----------|
| 57 | 1 | 0 | 4.262005  | -0.714664 | 1.287559  |
| 58 | 1 | 0 | 1.622896  | 1.360521  | 4.004432  |
| 59 | 7 | 0 | 0.861740  | -0.633851 | 1.387069  |
| 60 | 1 | 0 | -0.284761 | 0.405112  | 2.805589  |
| 61 | 6 | 0 | 3.113258  | -0.361347 | -2.759983 |
| 62 | 6 | 0 | 3.129752  | 0.367725  | 2.740095  |
| 63 | 6 | 0 | 4.086236  | -1.524710 | -4.577180 |
| 64 | 1 | 0 | 5.088568  | -1.728284 | -4.954830 |
| 65 | 1 | 0 | 3.571767  | -2.478409 | -4.400099 |
| 66 | 1 | 0 | 3.527087  | -0.954206 | -5.330309 |
| 67 | 6 | 0 | 4.111532  | 1.532965  | 4.551320  |
| 68 | 1 | 0 | 5.115753  | 1.738655  | 4.922757  |
| 69 | 1 | 0 | 3.593904  | 2.485571  | 4.377606  |
| 70 | 1 | 0 | 3.558316  | 0.961130  | 5.307814  |
| 71 | 8 | 0 | 4.250645  | -0.792572 | -3.388273 |
| 72 | 8 | 0 | 4.270116  | 0.801368  | 3.361279  |

#### IntH4

|                                              |             |
|----------------------------------------------|-------------|
| Thermal correction to Energy=                | 0.323229    |
| Thermal correction to Enthalpy=              | 0.324174    |
| Thermal correction to Gibbs Free Energy=     | 0.260953    |
| Sum of electronic and zero-point Energies=   | -773.465189 |
| Sum of electronic and thermal Energies=      | -773.447954 |
| Sum of electronic and thermal Enthalpies=    | -773.447010 |
| Sum of electronic and thermal Free Energies= | -773.510230 |

Esol =-774.0487549

| Center<br>Number | Atomic<br>Number | Atomic<br>Type | Coordinates (Angstroms) |           |           |
|------------------|------------------|----------------|-------------------------|-----------|-----------|
|                  |                  |                | X                       | Y         | Z         |
| 1                | 6                | 0              | 2.254250                | 1.264608  | -0.199728 |
| 2                | 6                | 0              | 3.622906                | 1.292650  | -0.206076 |
| 3                | 6                | 0              | 3.646304                | -1.099329 | 0.175458  |
| 4                | 6                | 0              | 2.293582                | -1.112592 | 0.178309  |
| 5                | 7                | 0              | 1.542684                | 0.062913  | -0.007725 |
| 6                | 1                | 0              | 1.641497                | 2.144307  | -0.339220 |
| 7                | 1                | 0              | 4.107001                | 2.249853  | -0.359582 |
| 8                | 1                | 0              | 4.197732                | -2.020801 | 0.322262  |
| 9                | 1                | 0              | 1.707268                | -2.010850 | 0.321971  |
| 10               | 5                | 0              | 0.118076                | 0.034686  | -0.001081 |
| 11               | 8                | 0              | -0.610103               | -1.110735 | 0.234421  |

|    |   |   |           |           |           |
|----|---|---|-----------|-----------|-----------|
| 12 | 8 | 0 | -0.658114 | 1.148889  | -0.230484 |
| 13 | 6 | 0 | -1.974558 | -0.785076 | -0.103008 |
| 14 | 6 | 0 | -2.007146 | 0.765666  | 0.110240  |
| 15 | 6 | 0 | -2.907506 | -1.571679 | 0.802013  |
| 16 | 1 | 0 | -3.947512 | -1.277982 | 0.626822  |
| 17 | 1 | 0 | -2.811892 | -2.638758 | 0.586402  |
| 18 | 1 | 0 | -2.667134 | -1.412264 | 1.854093  |
| 19 | 6 | 0 | -2.184629 | -1.178678 | -1.563456 |
| 20 | 1 | 0 | -1.936496 | -2.236016 | -1.681516 |
| 21 | 1 | 0 | -3.221633 | -1.025430 | -1.874601 |
| 22 | 1 | 0 | -1.531733 | -0.596237 | -2.220149 |
| 23 | 6 | 0 | -2.975058 | 1.511353  | -0.792693 |
| 24 | 1 | 0 | -3.999489 | 1.163920  | -0.624087 |
| 25 | 1 | 0 | -2.934640 | 2.580390  | -0.569529 |
| 26 | 1 | 0 | -2.722886 | 1.371279  | -1.844800 |
| 27 | 6 | 0 | -2.229203 | 1.151603  | 1.570933  |
| 28 | 1 | 0 | -2.020832 | 2.217666  | 1.687376  |
| 29 | 1 | 0 | -3.259062 | 0.960117  | 1.884790  |
| 30 | 1 | 0 | -1.553034 | 0.595210  | 2.226681  |
| 31 | 6 | 0 | 4.364740  | 0.114083  | -0.018803 |
| 32 | 8 | 0 | 5.727264  | 0.016235  | -0.004451 |
| 33 | 6 | 0 | 6.447037  | 1.208763  | -0.195212 |
| 34 | 1 | 0 | 6.226510  | 1.941646  | 0.592162  |
| 35 | 1 | 0 | 7.503604  | 0.943974  | -0.154078 |
| 36 | 1 | 0 | 6.225556  | 1.660489  | -1.171331 |

## I

|                                              |             |
|----------------------------------------------|-------------|
| Thermal correction to Energy=                | 0.172139    |
| Thermal correction to Enthalpy=              | 0.173083    |
| Thermal correction to Gibbs Free Energy=     | 0.129456    |
| Sum of electronic and zero-point Energies=   | -381.930511 |
| Sum of electronic and thermal Energies=      | -381.921879 |
| Sum of electronic and thermal Enthalpies=    | -381.920935 |
| Sum of electronic and thermal Free Energies= | -381.964562 |

Esol = -382.2270175

| Center<br>Number | Atomic<br>Number | Atomic<br>Type | Coordinates (Angstroms) |          |           |
|------------------|------------------|----------------|-------------------------|----------|-----------|
|                  |                  |                | X                       | Y        | Z         |
| 1                | 6                | 0              | 1.609210                | 1.126724 | -0.100503 |
| 2                | 6                | 0              | 0.241072                | 1.194431 | 0.116422  |

|    |   |   |           |           |           |
|----|---|---|-----------|-----------|-----------|
| 3  | 6 | 0 | -0.497773 | -0.000532 | 0.222870  |
| 4  | 6 | 0 | 0.239718  | -1.196126 | 0.114243  |
| 5  | 6 | 0 | 1.607935  | -1.129570 | -0.102578 |
| 6  | 7 | 0 | 2.313314  | -0.001716 | -0.215079 |
| 7  | 1 | 0 | 2.175712  | 2.052535  | -0.183386 |
| 8  | 1 | 0 | -0.234574 | -2.165309 | 0.199475  |
| 9  | 1 | 0 | 2.173392  | -2.055873 | -0.187104 |
| 10 | 1 | 0 | -0.232140 | 2.163996  | 0.203317  |
| 11 | 7 | 0 | -1.856601 | 0.000078  | 0.419359  |
| 12 | 6 | 0 | -2.529628 | -1.250469 | 0.703983  |
| 13 | 1 | 0 | -3.595888 | -1.061530 | 0.827375  |
| 14 | 1 | 0 | -2.409142 | -1.955719 | -0.124959 |
| 15 | 1 | 0 | -2.152323 | -1.728307 | 1.618841  |
| 16 | 6 | 0 | -2.528035 | 1.250776  | 0.707089  |
| 17 | 1 | 0 | -2.407283 | 1.957721  | -0.120373 |
| 18 | 1 | 0 | -3.594424 | 1.062776  | 0.830785  |
| 19 | 1 | 0 | -2.149585 | 1.726148  | 1.622748  |

---

### TS11

|                                              |              |
|----------------------------------------------|--------------|
| Thermal correction to Energy=                | 0.560968     |
| Thermal correction to Enthalpy=              | 0.561912     |
| Thermal correction to Gibbs Free Energy=     | 0.473158     |
| Sum of electronic and zero-point Energies=   | -1203.796618 |
| Sum of electronic and thermal Energies=      | -1203.767759 |
| Sum of electronic and thermal Enthalpies=    | -1203.766815 |
| Sum of electronic and thermal Free Energies= | -1203.855568 |

Esol = -1204.7499636

---

| Center<br>Number | Atomic<br>Number | Atomic<br>Type | Coordinates (Angstroms) |           |           |
|------------------|------------------|----------------|-------------------------|-----------|-----------|
|                  |                  |                | X                       | Y         | Z         |
| 1                | 6                | 0              | 3.513350                | 0.936490  | -0.747179 |
| 2                | 6                | 0              | 3.317957                | 1.155879  | 0.789761  |
| 3                | 5                | 0              | 1.726229                | -0.277390 | 0.004671  |
| 4                | 8                | 0              | 2.291544                | 0.296807  | -1.139974 |
| 5                | 8                | 0              | 2.440726                | 0.078195  | 1.146086  |
| 6                | 6                | 0              | 4.592501                | 1.036406  | 1.614595  |
| 7                | 1                | 0              | 5.330656                | 1.781705  | 1.299744  |
| 8                | 1                | 0              | 4.360340                | 1.208323  | 2.668937  |
| 9                | 1                | 0              | 5.031385                | 0.042045  | 1.521344  |
| 10               | 6                | 0              | 4.646454                | -0.041838 | -1.061673 |

|    |   |   |           |           |           |
|----|---|---|-----------|-----------|-----------|
| 11 | 1 | 0 | 4.593998  | -0.305886 | -2.120668 |
| 12 | 1 | 0 | 5.629785  | 0.390734  | -0.854569 |
| 13 | 1 | 0 | 4.533241  | -0.958368 | -0.475977 |
| 14 | 6 | 0 | 3.688799  | 2.214336  | -1.555244 |
| 15 | 1 | 0 | 4.577965  | 2.763731  | -1.228300 |
| 16 | 1 | 0 | 3.811091  | 1.962433  | -2.612022 |
| 17 | 1 | 0 | 2.817435  | 2.864568  | -1.457485 |
| 18 | 6 | 0 | 2.617819  | 2.475832  | 1.119304  |
| 19 | 1 | 0 | 2.316468  | 2.453816  | 2.170264  |
| 20 | 1 | 0 | 3.284964  | 3.329516  | 0.965275  |
| 21 | 1 | 0 | 1.721622  | 2.611002  | 0.511106  |
| 22 | 6 | 0 | -1.154126 | -2.759033 | -0.816572 |
| 23 | 6 | 0 | -0.886699 | -3.122861 | 0.678320  |
| 24 | 5 | 0 | 0.612375  | -1.555752 | -0.034289 |
| 25 | 8 | 0 | 0.053659  | -2.070777 | -1.187176 |
| 26 | 8 | 0 | 0.006901  | -2.075345 | 1.094801  |
| 27 | 6 | 0 | -2.118303 | -3.097866 | 1.571323  |
| 28 | 1 | 0 | -2.866245 | -3.817725 | 1.222827  |
| 29 | 1 | 0 | -1.833816 | -3.365475 | 2.592175  |
| 30 | 1 | 0 | -2.566041 | -2.102145 | 1.591294  |
| 31 | 6 | 0 | -2.300791 | -1.761518 | -0.986358 |
| 32 | 1 | 0 | -2.283719 | -1.382410 | -2.011423 |
| 33 | 1 | 0 | -3.272408 | -2.228481 | -0.798688 |
| 34 | 1 | 0 | -2.182054 | -0.910517 | -0.308105 |
| 35 | 6 | 0 | -1.352179 | -3.950382 | -1.740940 |
| 36 | 1 | 0 | -2.219995 | -4.541108 | -1.429284 |
| 37 | 1 | 0 | -1.526248 | -3.595671 | -2.759965 |
| 38 | 1 | 0 | -0.471714 | -4.594478 | -1.750834 |
| 39 | 6 | 0 | -0.136415 | -4.443676 | 0.842690  |
| 40 | 1 | 0 | 0.200506  | -4.527921 | 1.878550  |
| 41 | 1 | 0 | -0.772437 | -5.302274 | 0.608332  |
| 42 | 1 | 0 | 0.743839  | -4.469329 | 0.194365  |
| 43 | 6 | 0 | -0.592045 | 1.425871  | -1.011740 |
| 44 | 6 | 0 | -1.850072 | 1.994025  | -1.105645 |
| 45 | 6 | 0 | -2.118791 | 1.536127  | 1.241165  |
| 46 | 6 | 0 | -0.847151 | 0.991829  | 1.220619  |
| 47 | 1 | 0 | 0.060023  | 1.338396  | -1.878561 |
| 48 | 1 | 0 | -2.193341 | 2.363356  | -2.062927 |
| 49 | 1 | 0 | -2.676397 | 1.541760  | 2.168443  |
| 50 | 7 | 0 | -0.087617 | 0.938875  | 0.123699  |
| 51 | 1 | 0 | -0.407273 | 0.555515  | 2.114505  |
| 52 | 6 | 0 | -2.661670 | 2.067492  | 0.048449  |
| 53 | 7 | 0 | -3.910370 | 2.619340  | 0.013537  |
| 54 | 6 | 0 | -4.740688 | 2.594487  | 1.201078  |

|    |   |   |           |          |           |
|----|---|---|-----------|----------|-----------|
| 55 | 1 | 0 | -4.267928 | 3.138965 | 2.026016  |
| 56 | 1 | 0 | -5.691952 | 3.077138 | 0.980712  |
| 57 | 1 | 0 | -4.942979 | 1.569157 | 1.536125  |
| 58 | 6 | 0 | -4.459797 | 3.072003 | -1.248870 |
| 59 | 1 | 0 | -4.541135 | 2.253352 | -1.975176 |
| 60 | 1 | 0 | -5.455323 | 3.479799 | -1.078316 |
| 61 | 1 | 0 | -3.840976 | 3.862010 | -1.688675 |

---

### IntI1

|                                              |              |
|----------------------------------------------|--------------|
| Thermal correction to Energy=                | 0.562253     |
| Thermal correction to Enthalpy=              | 0.563198     |
| Thermal correction to Gibbs Free Energy=     | 0.473223     |
| Sum of electronic and zero-point Energies=   | -1203.801070 |
| Sum of electronic and thermal Energies=      | -1203.771932 |
| Sum of electronic and thermal Enthalpies=    | -1203.770988 |
| Sum of electronic and thermal Free Energies= | -1203.860962 |

Esol = -1204.7563835

---

| Center<br>Number | Atomic<br>Number | Atomic<br>Type | Coordinates (Angstroms) |           |           |
|------------------|------------------|----------------|-------------------------|-----------|-----------|
|                  |                  |                | X                       | Y         | Z         |
| 1                | 6                | 0              | 2.473828                | -1.142897 | -1.256616 |
| 2                | 6                | 0              | 2.945395                | -1.491214 | 0.190373  |
| 3                | 5                | 0              | 0.865218                | -0.472157 | 0.263389  |
| 4                | 8                | 0              | 1.456070                | -0.174642 | -1.027877 |
| 5                | 8                | 0              | 1.728504                | -1.432869 | 0.926244  |
| 6                | 6                | 0              | 3.540140                | -2.885331 | 0.343460  |
| 7                | 1                | 0              | 4.407557                | -3.017378 | -0.312594 |
| 8                | 1                | 0              | 3.866534                | -3.035118 | 1.376687  |
| 9                | 1                | 0              | 2.796924                | -3.648557 | 0.107493  |
| 10               | 6                | 0              | 1.830965                | -2.345741 | -1.952823 |
| 11               | 1                | 0              | 1.330737                | -1.993305 | -2.858497 |
| 12               | 1                | 0              | 2.569941                | -3.103998 | -2.230829 |
| 13               | 1                | 0              | 1.074097                | -2.797723 | -1.305587 |
| 14               | 6                | 0              | 3.550493                | -0.534240 | -2.145150 |
| 15               | 1                | 0              | 4.394566                | -1.222058 | -2.265011 |
| 16               | 1                | 0              | 3.134624                | -0.328043 | -3.135307 |
| 17               | 1                | 0              | 3.919528                | 0.405438  | -1.728195 |
| 18               | 6                | 0              | 3.924552                | -0.450074 | 0.746111  |
| 19               | 1                | 0              | 4.004898                | -0.592214 | 1.827621  |
| 20               | 1                | 0              | 4.921236                | -0.553618 | 0.305104  |

|    |   |   |           |           |           |
|----|---|---|-----------|-----------|-----------|
| 21 | 1 | 0 | 3.568236  | 0.566830  | 0.559322  |
| 22 | 6 | 0 | -2.790488 | -1.923007 | -0.177286 |
| 23 | 6 | 0 | -2.810665 | -1.444189 | 1.306853  |
| 24 | 5 | 0 | -0.786900 | -0.959972 | 0.354744  |
| 25 | 8 | 0 | -1.390032 | -1.866475 | -0.496496 |
| 26 | 8 | 0 | -1.668033 | -0.570388 | 1.357902  |
| 27 | 6 | 0 | -4.053894 | -0.668239 | 1.713389  |
| 28 | 1 | 0 | -4.950113 | -1.286620 | 1.597005  |
| 29 | 1 | 0 | -3.975288 | -0.374962 | 2.763608  |
| 30 | 1 | 0 | -4.169662 | 0.236193  | 1.114174  |
| 31 | 6 | 0 | -3.503877 | -0.953647 | -1.119856 |
| 32 | 1 | 0 | -3.264108 | -1.228917 | -2.149489 |
| 33 | 1 | 0 | -4.589656 | -0.987186 | -0.989800 |
| 34 | 1 | 0 | -3.159015 | 0.070507  | -0.951652 |
| 35 | 6 | 0 | -3.295424 | -3.340454 | -0.399628 |
| 36 | 1 | 0 | -4.338215 | -3.434934 | -0.078513 |
| 37 | 1 | 0 | -3.240761 | -3.583488 | -1.463746 |
| 38 | 1 | 0 | -2.689902 | -4.065622 | 0.146020  |
| 39 | 6 | 0 | -2.547043 | -2.580142 | 2.295414  |
| 40 | 1 | 0 | -2.367481 | -2.150125 | 3.284098  |
| 41 | 1 | 0 | -3.397582 | -3.264740 | 2.361633  |
| 42 | 1 | 0 | -1.658407 | -3.145894 | 2.001639  |
| 43 | 6 | 0 | 1.252802  | 2.132003  | 0.523153  |
| 44 | 6 | 0 | 1.322257  | 3.321942  | 1.215492  |
| 45 | 6 | 0 | 0.809413  | 2.086298  | 3.216783  |
| 46 | 6 | 0 | 0.754398  | 0.950299  | 2.440879  |
| 47 | 1 | 0 | 1.435163  | 2.058931  | -0.544126 |
| 48 | 1 | 0 | 1.554523  | 4.228226  | 0.673167  |
| 49 | 1 | 0 | 0.626981  | 2.001780  | 4.279142  |
| 50 | 7 | 0 | 0.973157  | 0.966529  | 1.119532  |
| 51 | 1 | 0 | 0.529743  | -0.025220 | 2.858355  |
| 52 | 6 | 0 | 1.098273  | 3.331803  | 2.611630  |
| 53 | 7 | 0 | 1.157532  | 4.481474  | 3.336975  |
| 54 | 6 | 0 | 0.923201  | 4.446135  | 4.768173  |
| 55 | 1 | 0 | 1.009410  | 5.455441  | 5.167719  |
| 56 | 1 | 0 | -0.080203 | 4.070566  | 4.999646  |
| 57 | 1 | 0 | 1.657068  | 3.811780  | 5.278662  |
| 58 | 6 | 0 | 1.457246  | 5.737404  | 2.675936  |
| 59 | 1 | 0 | 1.455984  | 6.537542  | 3.414531  |
| 60 | 1 | 0 | 2.443760  | 5.713270  | 2.198568  |
| 61 | 1 | 0 | 0.708307  | 5.975439  | 1.911770  |

---

**TSI2**

Thermal correction to Energy= 0.735897  
 Thermal correction to Enthalpy= 0.736841  
 Thermal correction to Gibbs Free Energy= 0.629453  
 Sum of electronic and zero-point Energies= -1585.745315  
 Sum of electronic and thermal Energies= -1585.707383  
 Sum of electronic and thermal Enthalpies= -1585.706439  
 Sum of electronic and thermal Free Energies= -1585.813827

Esol = -1586.9903615

---

| Center<br>Number | Atomic<br>Number | Atomic<br>Type | Coordinates (Angstroms) |           |           |
|------------------|------------------|----------------|-------------------------|-----------|-----------|
|                  |                  |                | X                       | Y         | Z         |
| 1                | 6                | 0              | 1.805441                | 0.520905  | -2.372168 |
| 2                | 6                | 0              | 2.558100                | 1.536710  | -0.328733 |
| 3                | 6                | 0              | 0.518271                | 0.598026  | -1.881046 |
| 4                | 1                | 0              | 1.962484                | 0.098688  | -3.355467 |
| 5                | 6                | 0              | 1.240910                | 1.577055  | 0.076231  |
| 6                | 1                | 0              | 3.317622                | 1.922474  | 0.337760  |
| 7                | 1                | 0              | -0.337378               | 0.216546  | -2.429642 |
| 8                | 1                | 0              | 0.932005                | 1.983986  | 1.033623  |
| 9                | 7                | 0              | 0.238404                | 1.097805  | -0.669306 |
| 10               | 6                | 0              | -2.681984               | -2.433383 | -1.249305 |
| 11               | 6                | 0              | -3.095987               | -2.550854 | 0.250292  |
| 12               | 5                | 0              | -1.665397               | -0.775511 | -0.023462 |
| 13               | 8                | 0              | -1.527560               | -1.588658 | -1.185712 |
| 14               | 8                | 0              | -2.708456               | -1.276716 | 0.769189  |
| 15               | 6                | 0              | -4.589539               | -2.735742 | 0.482689  |
| 16               | 1                | 0              | -4.953202               | -3.646728 | -0.005240 |
| 17               | 1                | 0              | -4.783610               | -2.820480 | 1.555396  |
| 18               | 1                | 0              | -5.151186               | -1.880725 | 0.102499  |
| 19               | 6                | 0              | -3.728766               | -1.690743 | -2.083059 |
| 20               | 1                | 0              | -3.303105               | -1.478184 | -3.067517 |
| 21               | 1                | 0              | -4.642196               | -2.278242 | -2.216682 |
| 22               | 1                | 0              | -3.974723               | -0.735037 | -1.610229 |
| 23               | 6                | 0              | -2.309015               | -3.750428 | -1.913771 |
| 24               | 1                | 0              | -3.157217               | -4.443409 | -1.909333 |
| 25               | 1                | 0              | -2.023529               | -3.568357 | -2.953760 |
| 26               | 1                | 0              | -1.467221               | -4.224752 | -1.404741 |
| 27               | 6                | 0              | -2.315340               | -3.637141 | 0.992993  |
| 28               | 1                | 0              | -2.472956               | -3.502770 | 2.066468  |
| 29               | 1                | 0              | -2.653538               | -4.639559 | 0.711501  |
| 30               | 1                | 0              | -1.244445               | -3.551860 | 0.795694  |

|    |   |   |           |           |           |
|----|---|---|-----------|-----------|-----------|
| 31 | 6 | 0 | -2.527309 | 2.878273  | -0.277222 |
| 32 | 6 | 0 | -2.345927 | 2.557971  | 1.240780  |
| 33 | 5 | 0 | -1.317622 | 0.913062  | -0.030541 |
| 34 | 8 | 0 | -2.246545 | 1.626809  | -0.888039 |
| 35 | 8 | 0 | -1.260877 | 1.636969  | 1.236681  |
| 36 | 6 | 0 | -1.977475 | 3.759214  | 2.102059  |
| 37 | 1 | 0 | -2.755227 | 4.529243  | 2.054947  |
| 38 | 1 | 0 | -1.872769 | 3.444419  | 3.144403  |
| 39 | 1 | 0 | -1.029963 | 4.198427  | 1.781248  |
| 40 | 6 | 0 | -1.517636 | 3.920859  | -0.772760 |
| 41 | 1 | 0 | -1.512547 | 3.904714  | -1.866213 |
| 42 | 1 | 0 | -1.775748 | 4.931141  | -0.438510 |
| 43 | 1 | 0 | -0.507985 | 3.687643  | -0.423037 |
| 44 | 6 | 0 | -3.936586 | 3.305852  | -0.668013 |
| 45 | 1 | 0 | -4.246018 | 4.201093  | -0.117172 |
| 46 | 1 | 0 | -3.968124 | 3.533501  | -1.737489 |
| 47 | 1 | 0 | -4.648789 | 2.502927  | -0.470304 |
| 48 | 6 | 0 | -3.569399 | 1.845134  | 1.823675  |
| 49 | 1 | 0 | -3.307872 | 1.464429  | 2.814880  |
| 50 | 1 | 0 | -4.428301 | 2.516978  | 1.921418  |
| 51 | 1 | 0 | -3.840124 | 0.988643  | 1.200022  |
| 52 | 6 | 0 | 1.074336  | -1.899747 | 0.142398  |
| 53 | 6 | 0 | 2.432169  | -1.819744 | 0.394694  |
| 54 | 6 | 0 | 1.880000  | -0.705264 | 2.444461  |
| 55 | 6 | 0 | 0.545328  | -0.830116 | 2.087610  |
| 56 | 1 | 0 | 0.695237  | -2.349389 | -0.773178 |
| 57 | 1 | 0 | 3.125390  | -2.227334 | -0.329595 |
| 58 | 1 | 0 | 2.129606  | -0.218243 | 3.378154  |
| 59 | 7 | 0 | 0.136861  | -1.405812 | 0.954174  |
| 60 | 1 | 0 | -0.242148 | -0.411178 | 2.708904  |
| 61 | 6 | 0 | 2.885992  | 0.949316  | -1.567944 |
| 62 | 6 | 0 | 2.876802  | -1.166403 | 1.560861  |
| 63 | 7 | 0 | 4.217619  | -0.952469 | 1.795320  |
| 64 | 7 | 0 | 4.187283  | 0.781079  | -1.954959 |
| 65 | 6 | 0 | 4.632649  | -0.483189 | 3.103995  |
| 66 | 1 | 0 | 4.352098  | -1.176452 | 3.908745  |
| 67 | 1 | 0 | 5.716116  | -0.363143 | 3.110868  |
| 68 | 1 | 0 | 4.187218  | 0.492394  | 3.320966  |
| 69 | 6 | 0 | 5.187780  | -1.646794 | 0.969535  |
| 70 | 1 | 0 | 5.060724  | -1.369244 | -0.082830 |
| 71 | 1 | 0 | 6.191145  | -1.348276 | 1.275122  |
| 72 | 1 | 0 | 5.106749  | -2.739712 | 1.050619  |
| 73 | 6 | 0 | 5.248212  | 1.356348  | -1.149229 |
| 74 | 1 | 0 | 6.210560  | 1.049324  | -1.558791 |



|    |   |   |          |           |           |
|----|---|---|----------|-----------|-----------|
| 75 | 1 | 0 | 5.209679 | 2.453721  | -1.130214 |
| 76 | 1 | 0 | 5.184560 | 0.989645  | -0.118542 |
| 77 | 6 | 0 | 4.479254 | 0.331541  | -3.303212 |
| 78 | 1 | 0 | 5.558895 | 0.247547  | -3.423424 |
| 79 | 1 | 0 | 4.041699 | -0.655120 | -3.486494 |
| 80 | 1 | 0 | 4.097876 | 1.025572  | -4.063243 |

---

## IntI2

|                                              |              |
|----------------------------------------------|--------------|
| Thermal correction to Energy=                | 0.737048     |
| Thermal correction to Enthalpy=              | 0.737992     |
| Thermal correction to Gibbs Free Energy=     | 0.626179     |
| Sum of electronic and zero-point Energies=   | -1585.749788 |
| Sum of electronic and thermal Energies=      | -1585.710999 |
| Sum of electronic and thermal Enthalpies=    | -1585.710055 |
| Sum of electronic and thermal Free Energies= | -1585.821868 |

Esol = -1586.9958053

---

| Center<br>Number | Atomic<br>Number | Atomic<br>Type | Coordinates (Angstroms) |           |           |
|------------------|------------------|----------------|-------------------------|-----------|-----------|
|                  |                  |                | X                       | Y         | Z         |
| 1                | 6                | 0              | -1.013940               | 2.129067  | -3.091449 |
| 2                | 6                | 0              | -1.690862               | 3.374436  | -1.146927 |
| 3                | 6                | 0              | -0.926286               | 1.012501  | -2.288402 |
| 4                | 1                | 0              | -0.778636               | 2.034235  | -4.142666 |
| 5                | 6                | 0              | -1.584378               | 2.203114  | -0.424136 |
| 6                | 1                | 0              | -2.000383               | 4.276774  | -0.637081 |
| 7                | 1                | 0              | -0.615657               | 0.043283  | -2.662923 |
| 8                | 1                | 0              | -1.804440               | 2.143968  | 0.638033  |
| 9                | 7                | 0              | -1.210915               | 1.044145  | -0.978776 |
| 10               | 6                | 0              | 2.427537                | -1.277011 | -1.356399 |
| 11               | 6                | 0              | 2.674560                | -1.760864 | 0.107564  |
| 12               | 5                | 0              | 0.861460                | -0.316215 | 0.059322  |
| 13               | 8                | 0              | 1.636533                | -0.109742 | -1.169776 |
| 14               | 8                | 0              | 1.436020                | -1.464301 | 0.736662  |
| 15               | 6                | 0              | 2.944223                | -3.253956 | 0.243868  |
| 16               | 1                | 0              | 3.817808                | -3.554867 | -0.345256 |
| 17               | 1                | 0              | 3.137663                | -3.498287 | 1.292540  |
| 18               | 1                | 0              | 2.076888                | -3.829340 | -0.084446 |
| 19               | 6                | 0              | 1.594437                | -2.286759 | -2.152746 |
| 20               | 1                | 0              | 1.305241                | -1.823154 | -3.101575 |
| 21               | 1                | 0              | 2.153811                | -3.200989 | -2.376376 |

|    |   |   |           |           |           |
|----|---|---|-----------|-----------|-----------|
| 22 | 1 | 0 | 0.681716  | -2.536195 | -1.602170 |
| 23 | 6 | 0 | 3.691184  | -0.910710 | -2.124036 |
| 24 | 1 | 0 | 4.364185  | -1.771229 | -2.206735 |
| 25 | 1 | 0 | 3.425535  | -0.588121 | -3.135099 |
| 26 | 1 | 0 | 4.224537  | -0.092529 | -1.635274 |
| 27 | 6 | 0 | 3.794573  | -0.966215 | 0.790719  |
| 28 | 1 | 0 | 3.742759  | -1.150624 | 1.867719  |
| 29 | 1 | 0 | 4.785202  | -1.265302 | 0.432433  |
| 30 | 1 | 0 | 3.671859  | 0.106996  | 0.618990  |
| 31 | 6 | 0 | -2.684244 | -1.757444 | -0.110270 |
| 32 | 6 | 0 | -2.436827 | -1.284937 | 1.357338  |
| 33 | 5 | 0 | -0.869772 | -0.314923 | -0.050960 |
| 34 | 8 | 0 | -1.445401 | -1.457235 | -0.737085 |
| 35 | 8 | 0 | -1.644782 | -0.116990 | 1.179587  |
| 36 | 6 | 0 | -3.700146 | -0.923308 | 2.127725  |
| 37 | 1 | 0 | -4.373954 | -1.783795 | 2.203938  |
| 38 | 1 | 0 | -3.434185 | -0.608623 | 3.141196  |
| 39 | 1 | 0 | -4.232715 | -0.100950 | 1.645164  |
| 40 | 6 | 0 | -3.803485 | -0.956541 | -0.787345 |
| 41 | 1 | 0 | -3.751939 | -1.132847 | -1.865717 |
| 42 | 1 | 0 | -4.794393 | -1.257333 | -0.431266 |
| 43 | 1 | 0 | -3.679640 | 0.115207  | -0.607466 |
| 44 | 6 | 0 | -2.955227 | -3.249210 | -0.257898 |
| 45 | 1 | 0 | -3.829068 | -3.553816 | 0.328940  |
| 46 | 1 | 0 | -3.148870 | -3.485444 | -1.308386 |
| 47 | 1 | 0 | -2.088389 | -3.827799 | 0.066071  |
| 48 | 6 | 0 | -1.604653 | -2.301461 | 2.145998  |
| 49 | 1 | 0 | -1.315200 | -1.845414 | 3.098408  |
| 50 | 1 | 0 | -2.164815 | -3.216911 | 2.362539  |
| 51 | 1 | 0 | -0.692062 | -2.547419 | 1.593640  |
| 52 | 6 | 0 | 1.581327  | 2.197573  | 0.451804  |
| 53 | 6 | 0 | 1.689832  | 3.363233  | 1.183403  |
| 54 | 6 | 0 | 1.007062  | 2.105241  | 3.117727  |
| 55 | 6 | 0 | 0.917738  | 0.994860  | 2.306332  |
| 56 | 1 | 0 | 1.802657  | 2.145633  | -0.610489 |
| 57 | 1 | 0 | 2.002443  | 4.268491  | 0.680669  |
| 58 | 1 | 0 | 0.770141  | 2.003198  | 4.167905  |
| 59 | 7 | 0 | 1.204178  | 1.035487  | 0.997351  |
| 60 | 1 | 0 | 0.603997  | 0.023736  | 2.673245  |
| 61 | 6 | 0 | -1.403132 | 3.366765  | -2.529900 |
| 62 | 6 | 0 | 1.400135  | 3.346086  | 2.565886  |
| 63 | 7 | 0 | -1.493402 | 4.498637  | -3.287187 |
| 64 | 7 | 0 | 1.492156  | 4.472086  | 3.331674  |
| 65 | 6 | 0 | -1.231754 | 4.435536  | -4.711844 |

|    |   |   |           |          |           |
|----|---|---|-----------|----------|-----------|
| 66 | 1 | 0 | -1.926942 | 3.757509 | -5.221838 |
| 67 | 1 | 0 | -1.348617 | 5.430326 | -5.139702 |
| 68 | 1 | 0 | -0.209462 | 4.096087 | -4.913333 |
| 69 | 6 | 0 | -1.948758 | 5.733769 | -2.682407 |
| 70 | 1 | 0 | -1.280286 | 6.051277 | -1.873402 |
| 71 | 1 | 0 | -1.960870 | 6.517950 | -3.438177 |
| 72 | 1 | 0 | -2.961540 | 5.635209 | -2.272495 |
| 73 | 6 | 0 | 1.952594  | 5.710245 | 2.737007  |
| 74 | 1 | 0 | 1.965525  | 6.488756 | 3.498603  |
| 75 | 1 | 0 | 2.965919  | 5.611641 | 2.328415  |
| 76 | 1 | 0 | 1.286762  | 6.035796 | 1.929037  |
| 77 | 6 | 0 | 1.229075  | 4.398875 | 4.755602  |
| 78 | 1 | 0 | 1.347244  | 5.390263 | 5.190935  |
| 79 | 1 | 0 | 0.205965  | 4.059836 | 4.953520  |
| 80 | 1 | 0 | 1.922507  | 3.715800 | 5.261241  |

---

### TSI3

|                                              |              |
|----------------------------------------------|--------------|
| Thermal correction to Energy=                | 0.734677     |
| Thermal correction to Enthalpy=              | 0.735621     |
| Thermal correction to Gibbs Free Energy=     | 0.630626     |
| Sum of electronic and zero-point Energies=   | -1585.716362 |
| Sum of electronic and thermal Energies=      | -1585.679028 |
| Sum of electronic and thermal Enthalpies=    | -1585.678084 |
| Sum of electronic and thermal Free Energies= | -1585.783079 |

Esol = -1586.9564405

---

| Center<br>Number | Atomic<br>Number | Atomic<br>Type | Coordinates (Angstroms) |           |           |
|------------------|------------------|----------------|-------------------------|-----------|-----------|
|                  |                  |                | X                       | Y         | Z         |
| 1                | 6                | 0              | -1.177998               | -2.981601 | 1.242340  |
| 2                | 6                | 0              | -2.650104               | -1.095304 | 1.243432  |
| 3                | 6                | 0              | -0.112941               | -2.143647 | 1.232589  |
| 4                | 1                | 0              | -0.997388               | -4.047293 | 1.312910  |
| 5                | 6                | 0              | -1.522151               | -0.256240 | 1.173282  |
| 6                | 1                | 0              | -3.620528               | -0.613578 | 1.242553  |
| 7                | 1                | 0              | 0.913362                | -2.486496 | 1.270153  |
| 8                | 1                | 0              | -1.588802               | 0.813162  | 1.340761  |
| 9                | 7                | 0              | -0.255548               | -0.771102 | 1.225583  |
| 10               | 6                | 0              | 2.046542                | -1.864699 | -2.024024 |
| 11               | 6                | 0              | 2.707156                | -0.507008 | -2.442146 |
| 12               | 5                | 0              | 0.934368                | -0.104309 | -1.078834 |

|    |   |   |           |           |           |
|----|---|---|-----------|-----------|-----------|
| 13 | 8 | 0 | 0.782910  | -1.447995 | -1.488051 |
| 14 | 8 | 0 | 2.197428  | 0.406732  | -1.460667 |
| 15 | 6 | 0 | 4.225611  | -0.494283 | -2.375422 |
| 16 | 1 | 0 | 4.652199  | -1.249278 | -3.044331 |
| 17 | 1 | 0 | 4.597559  | 0.486521  | -2.684452 |
| 18 | 1 | 0 | 4.567993  | -0.686747 | -1.356820 |
| 19 | 6 | 0 | 2.825758  | -2.576742 | -0.919295 |
| 20 | 1 | 0 | 2.222267  | -3.416292 | -0.560450 |
| 21 | 1 | 0 | 3.775101  | -2.974566 | -1.291077 |
| 22 | 1 | 0 | 3.015564  | -1.896996 | -0.083649 |
| 23 | 6 | 0 | 1.787202  | -2.818639 | -3.181844 |
| 24 | 1 | 0 | 2.724083  | -3.084290 | -3.683042 |
| 25 | 1 | 0 | 1.331395  | -3.736567 | -2.800905 |
| 26 | 1 | 0 | 1.107111  | -2.378122 | -3.912897 |
| 27 | 6 | 0 | 2.223194  | -0.024049 | -3.810508 |
| 28 | 1 | 0 | 2.554237  | 1.007945  | -3.952996 |
| 29 | 1 | 0 | 2.623135  | -0.634705 | -4.625406 |
| 30 | 1 | 0 | 1.129938  | -0.043774 | -3.860784 |
| 31 | 6 | 0 | 2.706951  | 0.506375  | 2.442427  |
| 32 | 6 | 0 | 2.046567  | 1.864198  | 2.024317  |
| 33 | 5 | 0 | 0.934064  | 0.104051  | 1.079055  |
| 34 | 8 | 0 | 2.196845  | -0.407402 | 1.461188  |
| 35 | 8 | 0 | 0.782889  | 1.447751  | 1.488270  |
| 36 | 6 | 0 | 1.787334  | 2.818105  | 3.182197  |
| 37 | 1 | 0 | 2.724235  | 3.083534  | 3.683475  |
| 38 | 1 | 0 | 1.331732  | 3.736150  | 2.801299  |
| 39 | 1 | 0 | 1.107113  | 2.377669  | 3.913176  |
| 40 | 6 | 0 | 2.223159  | 0.023630  | 3.810926  |
| 41 | 1 | 0 | 2.554098  | -1.008389 | 3.953468  |
| 42 | 1 | 0 | 2.623293  | 0.634321  | 4.625703  |
| 43 | 1 | 0 | 1.129913  | 0.043482  | 3.861355  |
| 44 | 6 | 0 | 4.225392  | 0.493315  | 2.375392  |
| 45 | 1 | 0 | 4.652290  | 1.248323  | 3.044089  |
| 46 | 1 | 0 | 4.597198  | -0.487521 | 2.684490  |
| 47 | 1 | 0 | 4.567581  | 0.685545  | 1.356680  |
| 48 | 6 | 0 | 2.825925  | 2.576268  | 0.919701  |
| 49 | 1 | 0 | 2.222671  | 3.416109  | 0.561132  |
| 50 | 1 | 0 | 3.775410  | 2.973709  | 1.291526  |
| 51 | 1 | 0 | 3.015486  | 1.896731  | 0.083827  |
| 52 | 6 | 0 | -1.521706 | 0.256689  | -1.173876 |
| 53 | 6 | 0 | -2.649392 | 1.096095  | -1.244314 |
| 54 | 6 | 0 | -1.176743 | 2.981953  | -1.242645 |
| 55 | 6 | 0 | -0.111924 | 2.143702  | -1.232689 |
| 56 | 1 | 0 | -1.588615 | -0.812682 | -1.341434 |

|    |   |   |           |           |           |
|----|---|---|-----------|-----------|-----------|
| 57 | 1 | 0 | -3.619957 | 0.614656  | -1.243841 |
| 58 | 1 | 0 | -0.995839 | 4.047606  | -1.313049 |
| 59 | 7 | 0 | -0.254927 | 0.771186  | -1.225767 |
| 60 | 1 | 0 | 0.914487  | 2.486257  | -1.269969 |
| 61 | 6 | 0 | -2.516679 | -2.468334 | 1.240444  |
| 62 | 6 | 0 | -2.515571 | 2.469070  | -1.241119 |
| 63 | 7 | 0 | -3.596459 | 3.362676  | -1.306261 |
| 64 | 7 | 0 | -3.597860 | -3.361551 | 1.305544  |
| 65 | 6 | 0 | -3.594681 | 4.444084  | -0.329615 |
| 66 | 1 | 0 | -4.321879 | 5.201670  | -0.633281 |
| 67 | 1 | 0 | -3.858135 | 4.088747  | 0.680044  |
| 68 | 1 | 0 | -2.615526 | 4.918754  | -0.276514 |
| 69 | 6 | 0 | -4.905460 | 2.761734  | -1.444896 |
| 70 | 1 | 0 | -5.642200 | 3.552828  | -1.601034 |
| 71 | 1 | 0 | -4.920518 | 2.100175  | -2.314278 |
| 72 | 1 | 0 | -5.206792 | 2.180262  | -0.555537 |
| 73 | 6 | 0 | -4.906759 | -2.760584 | 1.444858  |
| 74 | 1 | 0 | -5.208817 | -2.179635 | 0.555417  |
| 75 | 1 | 0 | -5.643340 | -3.551646 | 1.601974  |
| 76 | 1 | 0 | -4.921181 | -2.098551 | 2.313888  |
| 77 | 6 | 0 | -3.596595 | -4.443767 | 0.329832  |
| 78 | 1 | 0 | -2.616943 | -4.917217 | 0.275224  |
| 79 | 1 | 0 | -4.322308 | -5.202012 | 0.635430  |
| 80 | 1 | 0 | -3.862388 | -4.089576 | -0.679603 |

---

### IntI3

|                                              |              |
|----------------------------------------------|--------------|
| Thermal correction to Energy=                | 0.739456     |
| Thermal correction to Enthalpy=              | 0.740400     |
| Thermal correction to Gibbs Free Energy=     | 0.635813     |
| Sum of electronic and zero-point Energies=   | -1585.786827 |
| Sum of electronic and thermal Energies=      | -1585.749799 |
| Sum of electronic and thermal Enthalpies=    | -1585.748855 |
| Sum of electronic and thermal Free Energies= | -1585.853443 |

Esol = -1587.0358582

---

| Center<br>Number | Atomic<br>Number | Atomic<br>Type | Coordinates (Angstroms) |          |           |
|------------------|------------------|----------------|-------------------------|----------|-----------|
|                  |                  |                | X                       | Y        | Z         |
| 1                | 6                | 0              | -1.190144               | 2.844882 | -0.132879 |
| 2                | 6                | 0              | -2.213200               | 0.758465 | -0.820533 |
| 3                | 6                | 0              | 0.036360                | 2.325051 | -0.310602 |
| 4                | 1                | 0              | -1.305449               | 3.845986 | 0.262089  |

|    |   |   |           |           |           |
|----|---|---|-----------|-----------|-----------|
| 5  | 6 | 0 | -0.896744 | 0.093825  | -0.516588 |
| 6  | 1 | 0 | -3.021849 | 0.142374  | -1.192073 |
| 7  | 1 | 0 | 0.946571  | 2.893083  | -0.150066 |
| 8  | 1 | 0 | -0.742806 | -0.778937 | -1.159064 |
| 9  | 7 | 0 | 0.216750  | 1.018565  | -0.750201 |
| 10 | 6 | 0 | 2.498587  | 1.505292  | 2.961863  |
| 11 | 6 | 0 | 3.355301  | 0.195766  | 3.059612  |
| 12 | 5 | 0 | 1.437890  | -0.211141 | 1.937930  |
| 13 | 8 | 0 | 1.214174  | 1.005593  | 2.537364  |
| 14 | 8 | 0 | 2.742596  | -0.650755 | 2.066889  |
| 15 | 6 | 0 | 4.824569  | 0.369116  | 2.714500  |
| 16 | 1 | 0 | 5.303526  | 1.065734  | 3.410022  |
| 17 | 1 | 0 | 5.333109  | -0.595609 | 2.788712  |
| 18 | 1 | 0 | 4.947434  | 0.748053  | 1.698174  |
| 19 | 6 | 0 | 3.001019  | 2.459977  | 1.883314  |
| 20 | 1 | 0 | 2.263863  | 3.257641  | 1.760019  |
| 21 | 1 | 0 | 3.954779  | 2.914205  | 2.167893  |
| 22 | 1 | 0 | 3.119555  | 1.950595  | 0.921497  |
| 23 | 6 | 0 | 2.320047  | 2.243019  | 4.279598  |
| 24 | 1 | 0 | 3.289292  | 2.563495  | 4.675197  |
| 25 | 1 | 0 | 1.705697  | 3.131890  | 4.116205  |
| 26 | 1 | 0 | 1.823521  | 1.617148  | 5.022480  |
| 27 | 6 | 0 | 3.200391  | -0.511774 | 4.404325  |
| 28 | 1 | 0 | 3.651976  | -1.504124 | 4.332684  |
| 29 | 1 | 0 | 3.692682  | 0.040918  | 5.209176  |
| 30 | 1 | 0 | 2.143188  | -0.633961 | 4.657744  |
| 31 | 6 | 0 | 3.486710  | 0.747696  | -2.262941 |
| 32 | 6 | 0 | 3.021929  | -0.748950 | -2.240491 |
| 33 | 5 | 0 | 1.445673  | 0.581383  | -1.311445 |
| 34 | 8 | 0 | 2.582350  | 1.367659  | -1.327726 |
| 35 | 8 | 0 | 1.617824  | -0.633192 | -1.933094 |
| 36 | 6 | 0 | 3.171663  | -1.475929 | -3.567495 |
| 37 | 1 | 0 | 4.222785  | -1.504587 | -3.872640 |
| 38 | 1 | 0 | 2.817412  | -2.503995 | -3.460146 |
| 39 | 1 | 0 | 2.588080  | -0.994424 | -4.353454 |
| 40 | 6 | 0 | 3.255685  | 1.418378  | -3.615772 |
| 41 | 1 | 0 | 3.406590  | 2.494646  | -3.503419 |
| 42 | 1 | 0 | 3.948736  | 1.043849  | -4.374008 |
| 43 | 1 | 0 | 2.231718  | 1.249858  | -3.961911 |
| 44 | 6 | 0 | 4.911882  | 0.979041  | -1.790627 |
| 45 | 1 | 0 | 5.622368  | 0.459317  | -2.441415 |
| 46 | 1 | 0 | 5.138005  | 2.048102  | -1.819049 |
| 47 | 1 | 0 | 5.048396  | 0.623819  | -0.767604 |
| 48 | 6 | 0 | 3.671568  | -1.552510 | -1.117472 |

|    |   |   |           |           |           |
|----|---|---|-----------|-----------|-----------|
| 49 | 1 | 0 | 3.176797  | -2.525729 | -1.059553 |
| 50 | 1 | 0 | 4.735593  | -1.718474 | -1.310210 |
| 51 | 1 | 0 | 3.556946  | -1.051753 | -0.150381 |
| 52 | 6 | 0 | -0.880259 | -0.408303 | 0.961350  |
| 53 | 6 | 0 | -1.970404 | -1.425558 | 1.173683  |
| 54 | 6 | 0 | -0.342767 | -3.125921 | 0.598511  |
| 55 | 6 | 0 | 0.665919  | -2.278514 | 0.863834  |
| 56 | 1 | 0 | -1.033035 | 0.466484  | 1.601411  |
| 57 | 1 | 0 | -2.947572 | -1.071776 | 1.476102  |
| 58 | 1 | 0 | -0.135365 | -4.116584 | 0.214907  |
| 59 | 7 | 0 | 0.431056  | -0.976759 | 1.291554  |
| 60 | 1 | 0 | 1.709840  | -2.564038 | 0.789180  |
| 61 | 6 | 0 | -2.366840 | 2.070260  | -0.540983 |
| 62 | 6 | 0 | -1.720140 | -2.723745 | 0.901588  |
| 63 | 7 | 0 | -3.591374 | 2.761363  | -0.615326 |
| 64 | 7 | 0 | -2.697092 | -3.737522 | 0.890755  |
| 65 | 6 | 0 | -4.756601 | 1.945688  | -0.881258 |
| 66 | 1 | 0 | -4.759255 | 1.519787  | -1.899515 |
| 67 | 1 | 0 | -4.799559 | 1.122866  | -0.163120 |
| 68 | 1 | 0 | -5.653322 | 2.560471  | -0.765999 |
| 69 | 6 | 0 | -3.589231 | 3.974637  | -1.421108 |
| 70 | 1 | 0 | -2.717530 | 4.586778  | -1.191141 |
| 71 | 1 | 0 | -3.575752 | 3.752396  | -2.500676 |
| 72 | 1 | 0 | -4.488012 | 4.556730  | -1.198413 |
| 73 | 6 | 0 | -4.064779 | -3.293747 | 1.052156  |
| 74 | 1 | 0 | -4.282624 | -2.508456 | 0.323773  |
| 75 | 1 | 0 | -4.734862 | -4.138258 | 0.870701  |
| 76 | 1 | 0 | -4.272157 | -2.899736 | 2.062087  |
| 77 | 6 | 0 | -2.411298 | -4.907879 | 1.709020  |
| 78 | 1 | 0 | -3.084850 | -5.721020 | 1.423433  |
| 79 | 1 | 0 | -1.385363 | -5.242796 | 1.557291  |
| 80 | 1 | 0 | -2.548083 | -4.703280 | 2.783582  |

---

#### TSI4

|                                              |              |
|----------------------------------------------|--------------|
| Thermal correction to Energy=                | 0.734242     |
| Thermal correction to Enthalpy=              | 0.735186     |
| Thermal correction to Gibbs Free Energy=     | 0.626211     |
| Sum of electronic and zero-point Energies=   | -1585.723320 |
| Sum of electronic and thermal Energies=      | -1585.685360 |
| Sum of electronic and thermal Enthalpies=    | -1585.684416 |
| Sum of electronic and thermal Free Energies= | -1585.793392 |

Esol = -1586.9686268

| Center<br>Number | Atomic<br>Number | Atomic<br>Type | Coordinates (Angstroms) |           |           |
|------------------|------------------|----------------|-------------------------|-----------|-----------|
|                  |                  |                | X                       | Y         | Z         |
| 1                | 6                | 0              | 1.273459                | 3.165505  | -0.424968 |
| 2                | 6                | 0              | 2.724034                | 1.576625  | 0.646653  |
| 3                | 6                | 0              | 0.195147                | 2.485413  | 0.015233  |
| 4                | 1                | 0              | 1.119520                | 4.036933  | -1.051904 |
| 5                | 6                | 0              | 1.610507                | 0.827371  | 1.003958  |
| 6                | 1                | 0              | 3.693705                | 1.167973  | 0.910015  |
| 7                | 1                | 0              | -0.820293               | 2.798146  | -0.185853 |
| 8                | 1                | 0              | 1.670447                | -0.057578 | 1.623002  |
| 9                | 7                | 0              | 0.311881                | 1.330539  | 0.801354  |
| 10               | 6                | 0              | -2.083346               | 0.546726  | -2.804357 |
| 11               | 6                | 0              | -2.880529               | -0.726213 | -2.349312 |
| 12               | 5                | 0              | -0.836977               | -0.724428 | -1.403983 |
| 13               | 8                | 0              | -0.740901               | 0.252344  | -2.366312 |
| 14               | 8                | 0              | -2.128566               | -1.177499 | -1.203269 |
| 15               | 6                | 0              | -4.313092               | -0.457068 | -1.921699 |
| 16               | 1                | 0              | -4.898148               | -0.068412 | -2.761260 |
| 17               | 1                | 0              | -4.774150               | -1.389848 | -1.585325 |
| 18               | 1                | 0              | -4.348923               | 0.263267  | -1.103132 |
| 19               | 6                | 0              | -2.541907               | 1.815552  | -2.092786 |
| 20               | 1                | 0              | -1.818637               | 2.607745  | -2.303670 |
| 21               | 1                | 0              | -3.523527               | 2.136253  | -2.454334 |
| 22               | 1                | 0              | -2.593169               | 1.662334  | -1.010798 |
| 23               | 6                | 0              | -2.058106               | 0.769320  | -4.309334 |
| 24               | 1                | 0              | -3.073722               | 0.905330  | -4.694693 |
| 25               | 1                | 0              | -1.483571               | 1.671884  | -4.531136 |
| 26               | 1                | 0              | -1.590787               | -0.068414 | -4.828744 |
| 27               | 6                | 0              | -2.832432               | -1.854721 | -3.378635 |
| 28               | 1                | 0              | -3.236269               | -2.762196 | -2.923610 |
| 29               | 1                | 0              | -3.422574               | -1.615169 | -4.267200 |
| 30               | 1                | 0              | -1.802093               | -2.056252 | -3.686580 |
| 31               | 6                | 0              | -2.864441               | 0.752072  | 2.386464  |
| 32               | 6                | 0              | -2.071474               | -0.524980 | 2.837329  |
| 33               | 5                | 0              | -0.825889               | 0.739781  | 1.430482  |
| 34               | 8                | 0              | -2.116156               | 1.199511  | 1.236511  |
| 35               | 8                | 0              | -0.729834               | -0.237519 | 2.392277  |
| 36               | 6                | 0              | -2.039520               | -0.747749 | 4.342153  |
| 37               | 1                | 0              | -3.053797               | -0.878527 | 4.732812  |
| 38               | 1                | 0              | -1.468501               | -1.653274 | 4.560946  |
| 39               | 1                | 0              | -1.565174               | 0.087545  | 4.859118  |



|    |   |   |           |           |           |
|----|---|---|-----------|-----------|-----------|
| 40 | 6 | 0 | -2.805141 | 1.880283  | 3.415529  |
| 41 | 1 | 0 | -3.206661 | 2.789845  | 2.962627  |
| 42 | 1 | 0 | -3.391859 | 1.643751  | 4.307165  |
| 43 | 1 | 0 | -1.772180 | 2.076483  | 3.718086  |
| 44 | 6 | 0 | -4.300591 | 0.490343  | 1.966343  |
| 45 | 1 | 0 | -4.883250 | 0.104694  | 2.808952  |
| 46 | 1 | 0 | -4.758574 | 1.425501  | 1.632381  |
| 47 | 1 | 0 | -4.344423 | -0.229778 | 1.147977  |
| 48 | 6 | 0 | -2.540295 | -1.791400 | 2.128160  |
| 49 | 1 | 0 | -1.820046 | -2.587331 | 2.335276  |
| 50 | 1 | 0 | -3.521663 | -2.107028 | 2.494820  |
| 51 | 1 | 0 | -2.596398 | -1.637892 | 1.046453  |
| 52 | 6 | 0 | 1.601119  | -0.824527 | -0.990125 |
| 53 | 6 | 0 | 2.712624  | -1.579484 | -0.638575 |
| 54 | 6 | 0 | 1.259494  | -3.160852 | 0.440670  |
| 55 | 6 | 0 | 0.182416  | -2.475242 | 0.006039  |
| 56 | 1 | 0 | 1.662386  | 0.060090  | -1.609513 |
| 57 | 1 | 0 | 3.683001  | -1.175829 | -0.906996 |
| 58 | 1 | 0 | 1.104341  | -4.031451 | 1.068457  |
| 59 | 7 | 0 | 0.300996  | -1.321016 | -0.780755 |
| 60 | 1 | 0 | -0.833558 | -2.782736 | 0.212433  |
| 61 | 6 | 0 | 2.612042  | 2.748701  | -0.089831 |
| 62 | 6 | 0 | 2.598441  | -2.750948 | 0.098547  |
| 63 | 7 | 0 | 3.701533  | 3.507607  | -0.575580 |
| 64 | 7 | 0 | 3.686526  | -3.515431 | 0.578663  |
| 65 | 6 | 0 | 5.000141  | 2.883872  | -0.445134 |
| 66 | 1 | 0 | 5.328544  | 2.781274  | 0.604824  |
| 67 | 1 | 0 | 4.979216  | 1.889873  | -0.899678 |
| 68 | 1 | 0 | 5.740806  | 3.491393  | -0.971869 |
| 69 | 6 | 0 | 3.727637  | 4.889924  | -0.114161 |
| 70 | 1 | 0 | 2.749217  | 5.353089  | -0.249970 |
| 71 | 1 | 0 | 3.997281  | 4.966600  | 0.952755  |
| 72 | 1 | 0 | 4.457902  | 5.455112  | -0.700637 |
| 73 | 6 | 0 | 4.987629  | -2.898388 | 0.441427  |
| 74 | 1 | 0 | 4.974183  | -1.904281 | 0.896019  |
| 75 | 1 | 0 | 5.727891  | -3.509695 | 0.964333  |
| 76 | 1 | 0 | 5.311086  | -2.797510 | -0.610232 |
| 77 | 6 | 0 | 3.703120  | -4.897879 | 0.117194  |
| 78 | 1 | 0 | 4.433508  | -5.466798 | 0.699896  |
| 79 | 1 | 0 | 2.723050  | -5.356000 | 0.258117  |
| 80 | 1 | 0 | 3.966813  | -4.975973 | -0.951106 |

---

**IntI4**

|                                              |             |
|----------------------------------------------|-------------|
| Thermal correction to Energy=                | 0.365952    |
| Thermal correction to Enthalpy=              | 0.366896    |
| Thermal correction to Gibbs Free Energy=     | 0.301101    |
| Sum of electronic and zero-point Energies=   | -792.856252 |
| Sum of electronic and thermal Energies=      | -792.837715 |
| Sum of electronic and thermal Enthalpies=    | -792.836771 |
| Sum of electronic and thermal Free Energies= | -792.902566 |

Esol = -793.4812021

---

| Center<br>Number | Atomic<br>Number | Atomic<br>Type | Coordinates (Angstroms) |           |           |
|------------------|------------------|----------------|-------------------------|-----------|-----------|
|                  |                  |                | X                       | Y         | Z         |
| 1                | 6                | 0              | 2.308805                | 1.026990  | -0.204064 |
| 2                | 6                | 0              | 3.660858                | 0.999646  | -0.160193 |
| 3                | 6                | 0              | 3.589306                | -1.292991 | 0.584916  |
| 4                | 6                | 0              | 2.225680                | -1.251134 | 0.549173  |
| 5                | 7                | 0              | 1.534993                | -0.096966 | 0.132979  |
| 6                | 1                | 0              | 1.740002                | 1.904649  | -0.482564 |
| 7                | 1                | 0              | 4.204467                | 1.907563  | -0.399592 |
| 8                | 1                | 0              | 4.052267                | -2.219682 | 0.904997  |
| 9                | 1                | 0              | 1.597111                | -2.087035 | 0.824321  |
| 10               | 5                | 0              | 0.111836                | -0.060611 | 0.072841  |
| 11               | 8                | 0              | -0.685125               | -1.116175 | 0.455783  |
| 12               | 8                | 0              | -0.594459               | 1.034815  | -0.372965 |
| 13               | 6                | 0              | -2.016726               | -0.786838 | 0.007624  |
| 14               | 6                | 0              | -1.973758               | 0.777118  | -0.035905 |
| 15               | 6                | 0              | -3.022859               | -1.369594 | 0.985836  |
| 16               | 1                | 0              | -4.038108               | -1.053583 | 0.725638  |
| 17               | 1                | 0              | -2.982649               | -2.460888 | 0.943810  |
| 18               | 1                | 0              | -2.805587               | -1.058605 | 2.008724  |
| 19               | 6                | 0              | -2.192343               | -1.406952 | -1.377039 |
| 20               | 1                | 0              | -1.996894               | -2.479582 | -1.307822 |
| 21               | 1                | 0              | -3.207032               | -1.259430 | -1.756732 |
| 22               | 1                | 0              | -1.484413               | -0.973676 | -2.089666 |
| 23               | 6                | 0              | -2.864508               | 1.409669  | -1.091598 |
| 24               | 1                | 0              | -3.913150               | 1.150758  | -0.913519 |
| 25               | 1                | 0              | -2.768283               | 2.497340  | -1.046193 |
| 26               | 1                | 0              | -2.583633               | 1.082799  | -2.093821 |
| 27               | 6                | 0              | -2.229672               | 1.407308  | 1.331635  |
| 28               | 1                | 0              | -1.974451               | 2.468459  | 1.283056  |
| 29               | 1                | 0              | -3.278292               | 1.311801  | 1.626525  |
| 30               | 1                | 0              | -1.605919               | 0.938069  | 2.098256  |

|    |   |   |          |           |           |
|----|---|---|----------|-----------|-----------|
| 31 | 6 | 0 | 4.377815 | -0.175991 | 0.224851  |
| 32 | 7 | 0 | 5.789804 | -0.145699 | 0.268186  |
| 33 | 6 | 0 | 6.422549 | -1.256087 | 0.946696  |
| 34 | 1 | 0 | 6.323641 | -2.212836 | 0.402600  |
| 35 | 1 | 0 | 7.489381 | -1.043177 | 1.056672  |
| 36 | 1 | 0 | 5.990276 | -1.377010 | 1.942953  |
| 37 | 6 | 0 | 6.434143 | 0.137516  | -1.007968 |
| 38 | 1 | 0 | 5.966776 | 1.000761  | -1.484019 |
| 39 | 1 | 0 | 7.489684 | 0.370354  | -0.838595 |
| 40 | 1 | 0 | 6.369297 | -0.715162 | -1.705106 |

### Isobutyraldehyde

|                                              |             |
|----------------------------------------------|-------------|
| Thermal correction to Energy=                | 0.120121    |
| Thermal correction to Enthalpy=              | 0.121065    |
| Thermal correction to Gibbs Free Energy=     | 0.084076    |
| Sum of electronic and zero-point Energies=   | -232.234642 |
| Sum of electronic and thermal Energies=      | -232.228281 |
| Sum of electronic and thermal Enthalpies=    | -232.227337 |
| Sum of electronic and thermal Free Energies= | -232.264326 |

Esol= -232.4358346

| Center<br>Number | Atomic<br>Number | Atomic<br>Type | Coordinates (Angstroms) |           |           |
|------------------|------------------|----------------|-------------------------|-----------|-----------|
|                  |                  |                | X                       | Y         | Z         |
| 1                | 6                | 0              | -0.422361               | -0.845789 | -0.000839 |
| 2                | 6                | 0              | 1.109581                | -0.833946 | -0.012566 |
| 3                | 1                | 0              | 1.480217                | -0.285627 | -0.884188 |
| 4                | 1                | 0              | -0.832709               | 0.166352  | -0.040370 |
| 5                | 1                | 0              | -0.803610               | -1.404937 | -0.859433 |
| 6                | 1                | 0              | -0.796859               | -1.331894 | 0.906890  |
| 7                | 6                | 0              | 1.670104                | -2.259993 | -0.001822 |
| 8                | 1                | 0              | 2.762275                | -2.262513 | -0.039324 |
| 9                | 1                | 0              | 1.357646                | -2.790824 | 0.904389  |
| 10               | 1                | 0              | 1.295486                | -2.821274 | -0.861928 |
| 11               | 6                | 0              | 1.606512                | -0.102365 | 1.212766  |
| 12               | 8                | 0              | 2.290799                | 0.889005  | 1.199928  |
| 13               | 1                | 0              | 1.285058                | -0.561160 | 2.177705  |

### TS1

|                               |          |
|-------------------------------|----------|
| Thermal correction to Energy= | 0.496988 |
|-------------------------------|----------|

Thermal correction to Enthalpy= 0.497932  
 Thermal correction to Gibbs Free Energy= 0.408984  
 Sum of electronic and zero-point Energies= -1214.375561  
 Sum of electronic and thermal Energies= -1214.348053  
 Sum of electronic and thermal Enthalpies= -1214.347109  
 Sum of electronic and thermal Free Energies= -1214.436057

Esol=-1215.2686411

| Center<br>Number | Atomic<br>Number | Atomic<br>Type | Coordinates (Angstroms) |           |           |
|------------------|------------------|----------------|-------------------------|-----------|-----------|
|                  |                  |                | X                       | Y         | Z         |
| 1                | 6                | 0              | 0.900116                | 3.437318  | -0.225306 |
| 2                | 1                | 0              | 1.588343                | 4.294991  | -0.162416 |
| 3                | 6                | 0              | 1.716804                | 2.228846  | 0.103601  |
| 4                | 8                | 0              | 1.949549                | 1.343533  | -0.721213 |
| 5                | 1                | 0              | 2.110457                | 2.107491  | 1.125435  |
| 6                | 5                | 0              | 2.292535                | -0.298850 | -0.120688 |
| 7                | 8                | 0              | 3.054420                | -0.901757 | -1.122031 |
| 8                | 8                | 0              | 3.017965                | -0.134604 | 1.069806  |
| 9                | 6                | 0              | 4.253033                | -1.370342 | -0.480697 |
| 10               | 6                | 0              | 4.393556                | -0.384909 | 0.726473  |
| 11               | 6                | 0              | 5.400185                | -1.318894 | -1.476202 |
| 12               | 1                | 0              | 6.346141                | -1.574847 | -0.987763 |
| 13               | 1                | 0              | 5.222227                | -2.042184 | -2.275943 |
| 14               | 1                | 0              | 5.489000                | -0.328566 | -1.925304 |
| 15               | 6                | 0              | 4.000682                | -2.807630 | -0.026827 |
| 16               | 1                | 0              | 3.699831                | -3.399039 | -0.894907 |
| 17               | 1                | 0              | 4.896661                | -3.258605 | 0.409162  |
| 18               | 1                | 0              | 3.192264                | -2.842203 | 0.709579  |
| 19               | 6                | 0              | 5.098865                | -0.963108 | 1.942240  |
| 20               | 1                | 0              | 6.115129                | -1.278516 | 1.684934  |
| 21               | 1                | 0              | 5.166120                | -0.203064 | 2.725284  |
| 22               | 1                | 0              | 4.552501                | -1.818709 | 2.341824  |
| 23               | 6                | 0              | 5.036520                | 0.941111  | 0.318855  |
| 24               | 1                | 0              | 4.898920                | 1.662853  | 1.129512  |
| 25               | 1                | 0              | 6.109506                | 0.826783  | 0.141127  |
| 26               | 1                | 0              | 4.573598                | 1.339270  | -0.588484 |
| 27               | 6                | 0              | 0.146918                | -0.230344 | 1.131620  |
| 28               | 6                | 0              | -1.217780               | -0.212503 | 1.163635  |
| 29               | 6                | 0              | -1.239685               | -1.107046 | -1.071689 |
| 30               | 6                | 0              | 0.119232                | -1.113274 | -1.059554 |
| 31               | 7                | 0              | 0.846518                | -0.681381 | 0.029442  |

|    |   |   |           |           |           |
|----|---|---|-----------|-----------|-----------|
| 32 | 1 | 0 | 0.757366  | 0.071991  | 1.974803  |
| 33 | 1 | 0 | -1.695133 | 0.164087  | 2.061703  |
| 34 | 1 | 0 | -1.740275 | -1.504637 | -1.946472 |
| 35 | 1 | 0 | 0.716949  | -1.459011 | -1.895038 |
| 36 | 6 | 0 | -1.996932 | -0.643508 | 0.054749  |
| 37 | 6 | 0 | -3.444347 | -0.607429 | 0.060621  |
| 38 | 6 | 0 | -4.180141 | -0.528659 | 1.266525  |
| 39 | 6 | 0 | -4.186848 | -0.645326 | -1.142818 |
| 40 | 6 | 0 | -5.560173 | -0.483913 | 1.271787  |
| 41 | 1 | 0 | -3.658830 | -0.540204 | 2.217373  |
| 42 | 6 | 0 | -5.567521 | -0.601363 | -1.144028 |
| 43 | 1 | 0 | -3.667724 | -0.674301 | -2.094343 |
| 44 | 6 | 0 | -6.273861 | -0.518003 | 0.064489  |
| 45 | 1 | 0 | -6.102757 | -0.434394 | 2.210022  |
| 46 | 1 | 0 | -6.114994 | -0.619475 | -2.080527 |
| 47 | 6 | 0 | -7.706345 | -0.466377 | 0.066783  |
| 48 | 7 | 0 | -8.864410 | -0.421233 | 0.069378  |
| 49 | 6 | 0 | 0.297790  | 3.340894  | -1.622174 |
| 50 | 1 | 0 | -0.291903 | 4.233711  | -1.841026 |
| 51 | 1 | 0 | 1.071811  | 3.233822  | -2.384338 |
| 52 | 1 | 0 | -0.356655 | 2.465901  | -1.684435 |
| 53 | 6 | 0 | -0.168916 | 3.613507  | 0.866006  |
| 54 | 1 | 0 | 0.275801  | 3.654041  | 1.864745  |
| 55 | 1 | 0 | -0.717279 | 4.543531  | 0.699995  |
| 56 | 1 | 0 | -0.876882 | 2.780188  | 0.836158  |

## Int2

|                                              |              |
|----------------------------------------------|--------------|
| Thermal correction to Energy=                | 0.498434     |
| Thermal correction to Enthalpy=              | 0.499378     |
| Thermal correction to Gibbs Free Energy=     | 0.411669     |
| Sum of electronic and zero-point Energies=   | -1214.381721 |
| Sum of electronic and thermal Energies=      | -1214.354114 |
| Sum of electronic and thermal Enthalpies=    | -1214.353170 |
| Sum of electronic and thermal Free Energies= | -1214.440879 |

Esol= -1215.2748828

| Center<br>Number | Atomic<br>Number | Atomic<br>Type | Coordinates (Angstroms) |           |          |
|------------------|------------------|----------------|-------------------------|-----------|----------|
|                  |                  |                | X                       | Y         | Z        |
| 1                | 6                | 0              | 2.003582                | -1.744582 | 4.618121 |
| 2                | 1                | 0              | 2.998275                | -1.676081 | 5.093480 |

|    |   |   |           |           |           |
|----|---|---|-----------|-----------|-----------|
| 3  | 6 | 0 | 2.127458  | -2.418307 | 3.291178  |
| 4  | 8 | 0 | 2.769883  | -1.744769 | 2.318695  |
| 5  | 1 | 0 | 2.062851  | -3.501574 | 3.187194  |
| 6  | 5 | 0 | 2.339750  | -1.987351 | 0.960219  |
| 7  | 8 | 0 | 3.197121  | -1.401083 | -0.009779 |
| 8  | 8 | 0 | 2.033538  | -3.335781 | 0.581296  |
| 9  | 6 | 0 | 3.238527  | -2.296423 | -1.122056 |
| 10 | 6 | 0 | 2.967655  | -3.679468 | -0.444489 |
| 11 | 6 | 0 | 4.596864  | -2.176578 | -1.796914 |
| 12 | 1 | 0 | 4.711332  | -2.931628 | -2.581958 |
| 13 | 1 | 0 | 4.694472  | -1.188720 | -2.255614 |
| 14 | 1 | 0 | 5.401139  | -2.294443 | -1.069207 |
| 15 | 6 | 0 | 2.127127  | -1.910322 | -2.101812 |
| 16 | 1 | 0 | 2.238583  | -0.852625 | -2.357761 |
| 17 | 1 | 0 | 2.175831  | -2.496944 | -3.024010 |
| 18 | 1 | 0 | 1.141594  | -2.056518 | -1.649106 |
| 19 | 6 | 0 | 2.341901  | -4.723038 | -1.357348 |
| 20 | 1 | 0 | 2.993747  | -4.935222 | -2.211256 |
| 21 | 1 | 0 | 2.193355  | -5.653513 | -0.802657 |
| 22 | 1 | 0 | 1.371125  | -4.389166 | -1.728744 |
| 23 | 6 | 0 | 4.221670  | -4.242427 | 0.227428  |
| 24 | 1 | 0 | 3.927238  | -5.081651 | 0.863109  |
| 25 | 1 | 0 | 4.952697  | -4.599070 | -0.504500 |
| 26 | 1 | 0 | 4.689110  | -3.480531 | 0.857966  |
| 27 | 6 | 0 | -0.227392 | -1.796943 | 1.381631  |
| 28 | 6 | 0 | -1.398242 | -1.097968 | 1.639893  |
| 29 | 6 | 0 | -0.261958 | 0.913237  | 0.993857  |
| 30 | 6 | 0 | 0.869332  | 0.153274  | 0.758883  |
| 31 | 7 | 0 | 0.872946  | -1.169794 | 0.950576  |
| 32 | 1 | 0 | -0.132923 | -2.871161 | 1.495020  |
| 33 | 1 | 0 | -2.268085 | -1.627301 | 2.012562  |
| 34 | 1 | 0 | -0.244131 | 1.979712  | 0.800806  |
| 35 | 1 | 0 | 1.810318  | 0.565004  | 0.407796  |
| 36 | 6 | 0 | -1.428893 | 0.285511  | 1.451249  |
| 37 | 6 | 0 | -2.656438 | 1.067125  | 1.728618  |
| 38 | 6 | 0 | -3.915716 | 0.549407  | 1.405245  |
| 39 | 6 | 0 | -2.570325 | 2.332648  | 2.320536  |
| 40 | 6 | 0 | -5.067367 | 1.278089  | 1.663032  |
| 41 | 1 | 0 | -3.991527 | -0.420598 | 0.923995  |
| 42 | 6 | 0 | -3.716157 | 3.067340  | 2.587563  |
| 43 | 1 | 0 | -1.599705 | 2.730273  | 2.600058  |
| 44 | 6 | 0 | -4.968421 | 2.540217  | 2.257149  |
| 45 | 1 | 0 | -6.042795 | 0.881978  | 1.403539  |
| 46 | 1 | 0 | -3.650228 | 4.042787  | 3.056518  |

|    |   |   |           |           |          |
|----|---|---|-----------|-----------|----------|
| 47 | 6 | 0 | -6.160319 | 3.298663  | 2.532817 |
| 48 | 7 | 0 | -7.117711 | 3.908600  | 2.756368 |
| 49 | 6 | 0 | 1.482192  | -0.314461 | 4.436963 |
| 50 | 1 | 0 | 1.417248  | 0.205878  | 5.397447 |
| 51 | 1 | 0 | 2.139531  | 0.251277  | 3.772756 |
| 52 | 1 | 0 | 0.480402  | -0.336955 | 3.987843 |
| 53 | 6 | 0 | 1.087196  | -2.558601 | 5.530401 |
| 54 | 1 | 0 | 1.468811  | -3.574081 | 5.673419 |
| 55 | 1 | 0 | 0.989149  | -2.090037 | 6.513402 |
| 56 | 1 | 0 | 0.088481  | -2.633683 | 5.085115 |

## TS2

|                                              |              |
|----------------------------------------------|--------------|
| Thermal correction to Energy=                | 0.497486     |
| Thermal correction to Enthalpy=              | 0.498430     |
| Thermal correction to Gibbs Free Energy=     | 0.408002     |
| Sum of electronic and zero-point Energies=   | -1214.373765 |
| Sum of electronic and thermal Energies=      | -1214.346017 |
| Sum of electronic and thermal Enthalpies=    | -1214.345073 |
| Sum of electronic and thermal Free Energies= | -1214.435501 |

Esol= -1215.2660111

| Center<br>Number | Atomic<br>Number | Atomic<br>Type | Coordinates (Angstroms) |           |           |
|------------------|------------------|----------------|-------------------------|-----------|-----------|
|                  |                  |                | X                       | Y         | Z         |
| 1                | 6                | 0              | 0.951472                | 4.469372  | 0.954407  |
| 2                | 6                | 0              | 1.559327                | 3.670776  | -0.197645 |
| 3                | 1                | 0              | 0.600277                | 5.446692  | 0.612567  |
| 4                | 1                | 0              | 0.108941                | 3.935153  | 1.402940  |
| 5                | 1                | 0              | 1.699483                | 4.638650  | 1.737249  |
| 6                | 1                | 0              | 0.789528                | 3.504902  | -0.964537 |
| 7                | 6                | 0              | 2.001389                | 2.330999  | 0.286511  |
| 8                | 8                | 0              | 2.370470                | 1.454029  | -0.690155 |
| 9                | 1                | 0              | 2.510435                | 2.226529  | 1.244948  |
| 10               | 5                | 0              | 2.767864                | 0.182773  | -0.327941 |
| 11               | 8                | 0              | 3.174531                | -0.719663 | -1.290021 |
| 12               | 8                | 0              | 3.204421                | -0.145809 | 0.948589  |
| 13               | 6                | 0              | 3.745563                | -1.838982 | -0.591362 |
| 14               | 6                | 0              | 4.163987                | -1.205211 | 0.781878  |
| 15               | 6                | 0              | 4.904933                | -2.380103 | -1.414946 |
| 16               | 1                | 0              | 5.430348                | -3.171525 | -0.870507 |
| 17               | 1                | 0              | 4.521828                | -2.802451 | -2.347513 |

|    |   |   |           |           |           |
|----|---|---|-----------|-----------|-----------|
| 18 | 1 | 0 | 5.614680  | -1.590478 | -1.665589 |
| 19 | 6 | 0 | 2.670173  | -2.914394 | -0.441995 |
| 20 | 1 | 0 | 2.274166  | -3.150545 | -1.433792 |
| 21 | 1 | 0 | 3.083588  | -3.829624 | -0.008413 |
| 22 | 1 | 0 | 1.847273  | -2.563027 | 0.183258  |
| 23 | 6 | 0 | 4.075742  | -2.148706 | 1.970635  |
| 24 | 1 | 0 | 4.737260  | -3.009575 | 1.829017  |
| 25 | 1 | 0 | 4.387021  | -1.623516 | 2.877365  |
| 26 | 1 | 0 | 3.055482  | -2.507486 | 2.115463  |
| 27 | 6 | 0 | 5.543788  | -0.550104 | 0.727220  |
| 28 | 1 | 0 | 5.689196  | 0.035133  | 1.638467  |
| 29 | 1 | 0 | 6.343029  | -1.293214 | 0.656372  |
| 30 | 1 | 0 | 5.615207  | 0.126664  | -0.129275 |
| 31 | 6 | 0 | -0.067957 | -0.101759 | 1.028978  |
| 32 | 6 | 0 | -1.456068 | -0.073563 | 1.099036  |
| 33 | 6 | 0 | -1.498448 | -0.755368 | -1.194753 |
| 34 | 6 | 0 | -0.109573 | -0.752783 | -1.168404 |
| 35 | 7 | 0 | 0.590675  | -0.439991 | -0.078951 |
| 36 | 1 | 0 | 0.551537  | 0.159176  | 1.883495  |
| 37 | 1 | 0 | -1.949234 | 0.232144  | 2.015837  |
| 38 | 1 | 0 | -2.026351 | -1.045655 | -2.096970 |
| 39 | 1 | 0 | 0.479444  | -1.011117 | -2.045417 |
| 40 | 6 | 0 | -2.200035 | -0.408400 | -0.035844 |
| 41 | 6 | 0 | -3.682677 | -0.394190 | -0.013011 |
| 42 | 6 | 0 | -4.379887 | -0.828464 | 1.120383  |
| 43 | 6 | 0 | -4.406170 | 0.053313  | -1.124602 |
| 44 | 6 | 0 | -5.766632 | -0.819081 | 1.147020  |
| 45 | 1 | 0 | -3.829090 | -1.199615 | 1.978933  |
| 46 | 6 | 0 | -5.793060 | 0.069427  | -1.108563 |
| 47 | 1 | 0 | -3.875238 | 0.415353  | -1.999393 |
| 48 | 6 | 0 | -6.476802 | -0.368454 | 0.029919  |
| 49 | 1 | 0 | -6.306180 | -1.163180 | 2.022483  |
| 50 | 1 | 0 | -6.352538 | 0.423952  | -1.967185 |
| 51 | 6 | 0 | -7.915833 | -0.354736 | 0.052869  |
| 52 | 7 | 0 | -9.072708 | -0.343535 | 0.072642  |
| 53 | 6 | 0 | 2.719999  | 4.434815  | -0.855550 |
| 54 | 1 | 0 | 3.501832  | 4.641445  | -0.116615 |
| 55 | 1 | 0 | 3.159129  | 3.841484  | -1.661010 |
| 56 | 1 | 0 | 2.379113  | 5.389677  | -1.268710 |

---

### Int3

Thermal correction to Energy=

0.314934



Thermal correction to Enthalpy= 0.315878  
 Thermal correction to Gibbs Free Energy= 0.254923  
 Sum of electronic and zero-point Energies= -643.173531  
 Sum of electronic and thermal Energies= -643.157324  
 Sum of electronic and thermal Enthalpies= -643.156380  
 Sum of electronic and thermal Free Energies= -643.217336

Esol= -643.7036558

| Center<br>Number | Atomic<br>Number | Atomic<br>Type | Coordinates (Angstroms) |           |           |
|------------------|------------------|----------------|-------------------------|-----------|-----------|
|                  |                  |                | X                       | Y         | Z         |
| 1                | 6                | 0              | -2.407319               | -2.494311 | -1.691486 |
| 2                | 6                | 0              | -3.198303               | -3.264091 | -0.620676 |
| 3                | 1                | 0              | -3.262180               | -4.313198 | -0.942589 |
| 4                | 1                | 0              | -1.391233               | -2.887227 | -1.774538 |
| 5                | 1                | 0              | -2.892402               | -2.575104 | -2.669363 |
| 6                | 1                | 0              | -2.346411               | -1.432927 | -1.427211 |
| 7                | 6                | 0              | -4.610748               | -2.702247 | -0.465829 |
| 8                | 1                | 0              | -5.182175               | -3.264345 | 0.277569  |
| 9                | 1                | 0              | -4.571400               | -1.655984 | -0.142411 |
| 10               | 1                | 0              | -5.150019               | -2.736848 | -1.416054 |
| 11               | 6                | 0              | -2.492618               | -3.239587 | 0.692555  |
| 12               | 8                | 0              | -1.272419               | -3.867849 | 0.703060  |
| 13               | 1                | 0              | -2.605451               | -2.404141 | 1.381179  |
| 14               | 5                | 0              | -0.387408               | -3.658766 | 1.715852  |
| 15               | 8                | 0              | -0.614083               | -2.816912 | 2.779290  |
| 16               | 8                | 0              | 0.833239                | -4.281390 | 1.753151  |
| 17               | 6                | 0              | 0.650718                | -2.687710 | 3.462159  |
| 18               | 6                | 0              | 1.378109                | -4.014951 | 3.061468  |
| 19               | 6                | 0              | 0.395486                | -2.525275 | 4.950937  |
| 20               | 1                | 0              | 1.340759                | -2.529737 | 5.502883  |
| 21               | 1                | 0              | -0.104480               | -1.571253 | 5.135561  |
| 22               | 1                | 0              | -0.240599               | -3.325257 | 5.332471  |
| 23               | 6                | 0              | 1.338963                | -1.447661 | 2.896336  |
| 24               | 1                | 0              | 0.674278                | -0.589525 | 3.020401  |
| 25               | 1                | 0              | 2.279743                | -1.240118 | 3.413422  |
| 26               | 1                | 0              | 1.546231                | -1.571944 | 1.829344  |
| 27               | 6                | 0              | 2.889515                | -3.904078 | 2.953562  |
| 28               | 1                | 0              | 3.321968                | -3.609490 | 3.915221  |
| 29               | 1                | 0              | 3.307097                | -4.873698 | 2.671510  |
| 30               | 1                | 0              | 3.179207                | -3.173908 | 2.196480  |
| 31               | 6                | 0              | 0.989192                | -5.189488 | 3.957049  |

|    |   |   |           |           |          |
|----|---|---|-----------|-----------|----------|
| 32 | 1 | 0 | 1.353375  | -6.113262 | 3.501852 |
| 33 | 1 | 0 | 1.425606  | -5.093743 | 4.954967 |
| 34 | 1 | 0 | -0.098082 | -5.260635 | 4.055684 |

---

### TS3

|                                              |              |
|----------------------------------------------|--------------|
| Thermal correction to Energy=                | 0.545020     |
| Thermal correction to Enthalpy=              | 0.545964     |
| Thermal correction to Gibbs Free Energy=     | 0.459717     |
| Sum of electronic and zero-point Energies=   | -1183.438709 |
| Sum of electronic and thermal Energies=      | -1183.411101 |
| Sum of electronic and thermal Enthalpies=    | -1183.410157 |
| Sum of electronic and thermal Free Energies= | -1183.496405 |

Esol=-1184.3600389

---

| Center<br>Number | Atomic<br>Number | Atomic<br>Type | Coordinates (Angstroms) |           |           |
|------------------|------------------|----------------|-------------------------|-----------|-----------|
|                  |                  |                | X                       | Y         | Z         |
| 1                | 6                | 0              | 4.801005                | -0.088485 | -0.764596 |
| 2                | 6                | 0              | 3.824933                | 0.032830  | 0.219042  |
| 3                | 6                | 0              | 2.515360                | 0.404823  | -0.110879 |
| 4                | 6                | 0              | 2.210611                | 0.664177  | -1.450433 |
| 5                | 6                | 0              | 3.190013                | 0.546833  | -2.434940 |
| 6                | 6                | 0              | 4.485406                | 0.167532  | -2.097118 |
| 7                | 1                | 0              | 5.811520                | -0.374185 | -0.489203 |
| 8                | 1                | 0              | 4.075080                | -0.151592 | 1.260583  |
| 9                | 1                | 0              | 1.191908                | 0.930938  | -1.711664 |
| 10               | 1                | 0              | 2.937415                | 0.751392  | -3.471308 |
| 11               | 1                | 0              | 5.246434                | 0.074008  | -2.865388 |
| 12               | 6                | 0              | 1.491989                | 0.584392  | 0.963138  |
| 13               | 6                | 0              | -0.318802               | 4.854024  | 0.559656  |
| 14               | 6                | 0              | -1.345664               | 3.756737  | 0.835517  |
| 15               | 1                | 0              | -0.677026               | 5.814133  | 0.940543  |
| 16               | 1                | 0              | 0.644606                | 4.645615  | 1.029861  |
| 17               | 1                | 0              | -0.156058               | 4.964641  | -0.518380 |
| 18               | 1                | 0              | -1.417010               | 3.591180  | 1.920661  |
| 19               | 6                | 0              | -0.943158               | 2.456812  | 0.206861  |
| 20               | 8                | 0              | -1.803690               | 1.432722  | 0.513189  |
| 21               | 1                | 0              | -0.577687               | 2.462598  | -0.821454 |
| 22               | 5                | 0              | -1.795914               | 0.275282  | -0.213622 |
| 23               | 8                | 0              | -2.771739               | -0.671029 | -0.087165 |
| 24               | 8                | 0              | -0.857564               | -0.010202 | -1.171371 |
| 25               | 6                | 0              | -2.341887               | -1.814498 | -0.857276 |

|    |   |   |           |           |           |
|----|---|---|-----------|-----------|-----------|
| 26 | 6 | 0 | -1.313418 | -1.188262 | -1.869890 |
| 27 | 6 | 0 | -3.562244 | -2.447141 | -1.507696 |
| 28 | 1 | 0 | -3.262975 | -3.274905 | -2.158477 |
| 29 | 1 | 0 | -4.219739 | -2.843706 | -0.730347 |
| 30 | 1 | 0 | -4.126763 | -1.721465 | -2.095308 |
| 31 | 6 | 0 | -1.695313 | -2.788227 | 0.120310  |
| 32 | 1 | 0 | -2.413967 | -3.020599 | 0.910167  |
| 33 | 1 | 0 | -1.402249 | -3.718745 | -0.374514 |
| 34 | 1 | 0 | -0.814230 | -2.343354 | 0.586745  |
| 35 | 6 | 0 | -0.105280 | -2.061178 | -2.169837 |
| 36 | 1 | 0 | -0.417584 | -3.013766 | -2.609794 |
| 37 | 1 | 0 | 0.549946  | -1.549982 | -2.880424 |
| 38 | 1 | 0 | 0.470099  | -2.254464 | -1.261482 |
| 39 | 6 | 0 | -1.965850 | -0.703626 | -3.161964 |
| 40 | 1 | 0 | -1.235591 | -0.117872 | -3.726009 |
| 41 | 1 | 0 | -2.296096 | -1.540367 | -3.783436 |
| 42 | 1 | 0 | -2.827292 | -0.064250 | -2.947793 |
| 43 | 6 | 0 | 0.991135  | -0.597426 | 1.695654  |
| 44 | 6 | 0 | 1.604841  | -1.855793 | 1.564648  |
| 45 | 6 | 0 | -0.118430 | -0.503848 | 2.557663  |
| 46 | 6 | 0 | 1.165263  | -2.951809 | 2.301300  |
| 47 | 1 | 0 | 2.438443  | -1.976679 | 0.881691  |
| 48 | 6 | 0 | -0.556901 | -1.600812 | 3.287914  |
| 49 | 1 | 0 | -0.659639 | 0.433108  | 2.638308  |
| 50 | 6 | 0 | 0.089283  | -2.830979 | 3.175482  |
| 51 | 1 | 0 | 1.666688  | -3.907808 | 2.184802  |
| 52 | 1 | 0 | -1.417134 | -1.496152 | 3.941812  |
| 53 | 1 | 0 | -0.252896 | -3.686655 | 3.748391  |
| 54 | 6 | 0 | 1.086827  | 1.851146  | 1.252777  |
| 55 | 1 | 0 | 1.587146  | 2.681170  | 0.766111  |
| 56 | 1 | 0 | 0.531785  | 2.079533  | 2.157336  |
| 57 | 6 | 0 | -2.737522 | 4.177047  | 0.333938  |
| 58 | 1 | 0 | -2.704944 | 4.385733  | -0.741107 |
| 59 | 1 | 0 | -3.467669 | 3.384404  | 0.509253  |
| 60 | 1 | 0 | -3.074182 | 5.084131  | 0.845091  |

---

#### Int4

|                                            |              |
|--------------------------------------------|--------------|
| Thermal correction to Energy=              | 0.548575     |
| Thermal correction to Enthalpy=            | 0.549519     |
| Thermal correction to Gibbs Free Energy=   | 0.462746     |
| Sum of electronic and zero-point Energies= | -1183.489372 |
| Sum of electronic and thermal Energies=    | -1183.462137 |
| Sum of electronic and thermal Enthalpies=  | -1183.461192 |

Sum of electronic and thermal Free Energies= -1183.547965

Esol= -1184.4127396

---

| Center<br>Number | Atomic<br>Number | Atomic<br>Type | Coordinates (Angstroms) |          |           |
|------------------|------------------|----------------|-------------------------|----------|-----------|
|                  |                  |                | X                       | Y        | Z         |
| 1                | 6                | 0              | 1.430798                | 2.881099 | 1.147027  |
| 2                | 6                | 0              | 1.322443                | 3.377325 | -0.141598 |
| 3                | 6                | 0              | 2.353490                | 4.157113 | -0.725710 |
| 4                | 6                | 0              | 3.491780                | 4.413859 | 0.079205  |
| 5                | 6                | 0              | 3.584438                | 3.920147 | 1.372311  |
| 6                | 6                | 0              | 2.562147                | 3.146245 | 1.918751  |
| 7                | 1                | 0              | 0.617325                | 2.293111 | 1.561014  |
| 8                | 1                | 0              | 0.416588                | 3.187788 | -0.706723 |
| 9                | 1                | 0              | 4.317964                | 4.997980 | -0.313462 |
| 10               | 1                | 0              | 4.467717                | 4.144241 | 1.964247  |
| 11               | 1                | 0              | 2.642229                | 2.762365 | 2.930187  |
| 12               | 6                | 0              | 2.209198                | 4.713532 | -2.045649 |
| 13               | 6                | 0              | 3.078205                | 6.184842 | -5.645746 |
| 14               | 6                | 0              | 3.678161                | 4.944294 | -4.983288 |
| 15               | 1                | 0              | 2.837180                | 5.972761 | -6.690942 |
| 16               | 1                | 0              | 2.157531                | 6.516217 | -5.160541 |
| 17               | 1                | 0              | 3.794209                | 7.015751 | -5.632283 |
| 18               | 1                | 0              | 2.906988                | 4.168094 | -4.905978 |
| 19               | 6                | 0              | 4.189159                | 5.255036 | -3.571012 |
| 20               | 8                | 0              | 4.790605                | 4.062532 | -3.065066 |
| 21               | 1                | 0              | 4.963109                | 6.033268 | -3.663034 |
| 22               | 5                | 0              | 5.898753                | 4.133708 | -2.294949 |
| 23               | 8                | 0              | 6.716986                | 3.054516 | -2.074927 |
| 24               | 8                | 0              | 6.338477                | 5.288738 | -1.675524 |
| 25               | 6                | 0              | 7.659909                | 3.446346 | -1.060751 |
| 26               | 6                | 0              | 7.668218                | 5.009955 | -1.190706 |
| 27               | 6                | 0              | 8.996747                | 2.781616 | -1.348625 |
| 28               | 1                | 0              | 9.758753                | 3.129047 | -0.643489 |
| 29               | 1                | 0              | 8.894515                | 1.699399 | -1.237602 |
| 30               | 1                | 0              | 9.333211                | 2.990167 | -2.365161 |
| 31               | 6                | 0              | 7.103851                | 2.965268 | 0.276510  |
| 32               | 1                | 0              | 6.951574                | 1.884820 | 0.223165  |
| 33               | 1                | 0              | 7.787065                | 3.184915 | 1.101705  |
| 34               | 1                | 0              | 6.135261                | 3.429505 | 0.479376  |
| 35               | 6                | 0              | 7.878507                | 5.755266 | 0.116625  |
| 36               | 1                | 0              | 8.844615                | 5.491543 | 0.558473  |

|    |   |   |           |          |           |
|----|---|---|-----------|----------|-----------|
| 37 | 1 | 0 | 7.868200  | 6.832206 | -0.068815 |
| 38 | 1 | 0 | 7.088003  | 5.523149 | 0.833123  |
| 39 | 6 | 0 | 8.639994  | 5.509222 | -2.257579 |
| 40 | 1 | 0 | 8.450543  | 6.570390 | -2.436003 |
| 41 | 1 | 0 | 9.680170  | 5.386920 | -1.943925 |
| 42 | 1 | 0 | 8.491770  | 4.970799 | -3.198569 |
| 43 | 6 | 0 | 1.161272  | 4.237150 | -2.961937 |
| 44 | 6 | 0 | 0.984473  | 2.862896 | -3.201616 |
| 45 | 6 | 0 | 0.351466  | 5.138665 | -3.670233 |
| 46 | 6 | 0 | 0.045093  | 2.414047 | -4.121577 |
| 47 | 1 | 0 | 1.621000  | 2.155789 | -2.677637 |
| 48 | 6 | 0 | -0.593007 | 4.688023 | -4.585739 |
| 49 | 1 | 0 | 0.450337  | 6.204535 | -3.483697 |
| 50 | 6 | 0 | -0.746943 | 3.324025 | -4.819664 |
| 51 | 1 | 0 | -0.062459 | 1.349124 | -4.302753 |
| 52 | 1 | 0 | -1.212827 | 5.404622 | -5.115631 |
| 53 | 1 | 0 | -1.478275 | 2.971347 | -5.539590 |
| 54 | 6 | 0 | 3.143489  | 5.774013 | -2.558049 |
| 55 | 1 | 0 | 3.684575  | 6.242116 | -1.732479 |
| 56 | 1 | 0 | 2.578839  | 6.577814 | -3.044808 |
| 57 | 6 | 0 | 4.829071  | 4.403485 | -5.835054 |
| 58 | 1 | 0 | 5.625355  | 5.153665 | -5.922893 |
| 59 | 1 | 0 | 5.255884  | 3.499906 | -5.397433 |
| 60 | 1 | 0 | 4.480860  | 4.169665 | -6.845088 |

#### TS4

|                                              |              |
|----------------------------------------------|--------------|
| Thermal correction to Energy=                | 0.763514     |
| Thermal correction to Enthalpy=              | 0.764458     |
| Thermal correction to Gibbs Free Energy=     | 0.655589     |
| Sum of electronic and zero-point Energies=   | -1534.476977 |
| Sum of electronic and thermal Energies=      | -1534.439035 |
| Sum of electronic and thermal Enthalpies=    | -1534.438090 |
| Sum of electronic and thermal Free Energies= | -1534.546960 |

Esol= -1535.7146854

| Center Number | Atomic Number | Atomic Type | Coordinates (Angstroms) |           |           |
|---------------|---------------|-------------|-------------------------|-----------|-----------|
|               |               |             | X                       | Y         | Z         |
| 1             | 6             | 0           | -1.591260               | -1.943216 | -2.647837 |
| 2             | 6             | 0           | -1.672040               | -0.767750 | -1.912908 |
| 3             | 6             | 0           | -0.923264               | -0.580280 | -0.734922 |

|    |   |   |           |           |           |
|----|---|---|-----------|-----------|-----------|
| 4  | 6 | 0 | -0.104616 | -1.646072 | -0.319063 |
| 5  | 6 | 0 | -0.031883 | -2.826934 | -1.050263 |
| 6  | 6 | 0 | -0.768757 | -2.983877 | -2.222013 |
| 7  | 1 | 0 | -2.181810 | -2.049410 | -3.552798 |
| 8  | 1 | 0 | -2.333492 | 0.026029  | -2.247779 |
| 9  | 1 | 0 | 0.499299  | -1.550739 | 0.578555  |
| 10 | 1 | 0 | 0.609562  | -3.631602 | -0.703395 |
| 11 | 1 | 0 | -0.706277 | -3.905343 | -2.791812 |
| 12 | 6 | 0 | 0.683578  | 3.667893  | 2.186431  |
| 13 | 6 | 0 | 1.268574  | 2.961235  | 0.963608  |
| 14 | 1 | 0 | 0.927337  | 4.733530  | 2.158578  |
| 15 | 1 | 0 | -0.405436 | 3.585298  | 2.231122  |
| 16 | 1 | 0 | 1.098990  | 3.256575  | 3.114690  |
| 17 | 1 | 0 | 0.725436  | 3.286990  | 0.069511  |
| 18 | 6 | 0 | 1.151932  | 1.432133  | 1.080742  |
| 19 | 8 | 0 | 1.690366  | 0.862382  | -0.112070 |
| 20 | 1 | 0 | 1.775433  | 1.131380  | 1.935490  |
| 21 | 5 | 0 | 2.768156  | 0.049895  | -0.064281 |
| 22 | 8 | 0 | 3.404042  | -0.393463 | -1.198522 |
| 23 | 8 | 0 | 3.354172  | -0.405095 | 1.101887  |
| 24 | 6 | 0 | 4.344888  | -1.394452 | -0.769662 |
| 25 | 6 | 0 | 4.620303  | -0.975391 | 0.712378  |
| 26 | 6 | 0 | 5.560251  | -1.353998 | -1.680653 |
| 27 | 1 | 0 | 6.335967  | -2.035713 | -1.317318 |
| 28 | 1 | 0 | 5.271640  | -1.667382 | -2.686960 |
| 29 | 1 | 0 | 5.974172  | -0.346264 | -1.742371 |
| 30 | 6 | 0 | 3.641866  | -2.746339 | -0.866918 |
| 31 | 1 | 0 | 3.244787  | -2.864631 | -1.877944 |
| 32 | 1 | 0 | 4.325014  | -3.572796 | -0.651250 |
| 33 | 1 | 0 | 2.801575  | -2.790908 | -0.167498 |
| 34 | 6 | 0 | 4.959245  | -2.120987 | 1.650850  |
| 35 | 1 | 0 | 5.867519  | -2.633212 | 1.317822  |
| 36 | 1 | 0 | 5.135285  | -1.730562 | 2.656350  |
| 37 | 1 | 0 | 4.144339  | -2.844444 | 1.702191  |
| 38 | 6 | 0 | 5.663052  | 0.135411  | 0.821481  |
| 39 | 1 | 0 | 5.647899  | 0.533934  | 1.838834  |
| 40 | 1 | 0 | 6.668929  | -0.235270 | 0.605649  |
| 41 | 1 | 0 | 5.434039  | 0.951191  | 0.128818  |
| 42 | 6 | 0 | -1.349108 | 1.936717  | -0.682507 |
| 43 | 6 | 0 | -0.758768 | 2.192107  | -1.927718 |
| 44 | 6 | 0 | -2.097107 | 2.958671  | -0.082270 |
| 45 | 6 | 0 | -0.913323 | 3.428287  | -2.546954 |
| 46 | 1 | 0 | -0.145875 | 1.423283  | -2.387695 |
| 47 | 6 | 0 | -2.251028 | 4.195505  | -0.700167 |

|    |   |   |           |           |           |
|----|---|---|-----------|-----------|-----------|
| 48 | 1 | 0 | -2.562676 | 2.778610  | 0.884354  |
| 49 | 6 | 0 | -1.657744 | 4.435670  | -1.937067 |
| 50 | 1 | 0 | -0.438117 | 3.609088  | -3.506219 |
| 51 | 1 | 0 | -2.835247 | 4.971754  | -0.215647 |
| 52 | 1 | 0 | -1.774336 | 5.400225  | -2.420615 |
| 53 | 6 | 0 | -0.259661 | 0.851434  | 1.310945  |
| 54 | 1 | 0 | -0.170660 | -0.107905 | 1.831391  |
| 55 | 1 | 0 | -0.793906 | 1.512924  | 2.002532  |
| 56 | 6 | 0 | 2.744417  | 3.331316  | 0.792357  |
| 57 | 1 | 0 | 3.333635  | 2.977312  | 1.648041  |
| 58 | 1 | 0 | 3.159856  | 2.890465  | -0.117138 |
| 59 | 1 | 0 | 2.865645  | 4.416231  | 0.726754  |
| 60 | 6 | 0 | -1.103727 | 0.658719  | 0.058544  |
| 61 | 1 | 0 | -2.336897 | 0.383271  | 0.660810  |
| 62 | 6 | 0 | -3.070477 | -1.099704 | 2.153562  |
| 63 | 6 | 0 | -3.484269 | -0.012533 | 1.247777  |
| 64 | 6 | 0 | -4.312759 | -0.396833 | 0.091798  |
| 65 | 6 | 0 | -4.346822 | -1.677020 | -0.309747 |
| 66 | 6 | 0 | -3.599768 | -2.789601 | 0.371594  |
| 67 | 6 | 0 | -3.093096 | -2.371308 | 1.724759  |
| 68 | 1 | 0 | -3.797089 | 0.908254  | 1.750750  |
| 69 | 1 | 0 | -4.921405 | -1.945478 | -1.195875 |
| 70 | 1 | 0 | -2.728662 | -3.041944 | -0.260894 |
| 71 | 1 | 0 | -2.755166 | -3.166812 | 2.388270  |
| 72 | 6 | 0 | -5.015046 | 0.705732  | -0.651054 |
| 73 | 1 | 0 | -4.289022 | 1.432840  | -1.035206 |
| 74 | 1 | 0 | -5.590446 | 0.314961  | -1.493587 |
| 75 | 1 | 0 | -5.696349 | 1.254385  | 0.009001  |
| 76 | 6 | 0 | -2.631687 | -0.724844 | 3.543921  |
| 77 | 1 | 0 | -2.258443 | -1.593491 | 4.091347  |
| 78 | 1 | 0 | -1.843293 | 0.034565  | 3.525540  |
| 79 | 1 | 0 | -3.470335 | -0.299896 | 4.107326  |
| 80 | 6 | 0 | -4.466075 | -4.053928 | 0.478150  |
| 81 | 1 | 0 | -4.801938 | -4.379806 | -0.510664 |
| 82 | 1 | 0 | -3.904647 | -4.875241 | 0.933295  |
| 83 | 1 | 0 | -5.349203 | -3.858903 | 1.093658  |

---

### Int5

|                                            |              |
|--------------------------------------------|--------------|
| Thermal correction to Energy=              | 0.562215     |
| Thermal correction to Enthalpy=            | 0.563159     |
| Thermal correction to Gibbs Free Energy=   | 0.476251     |
| Sum of electronic and zero-point Energies= | -1184.112521 |
| Sum of electronic and thermal Energies=    | -1184.085254 |

Sum of electronic and thermal Enthalpies= -1184.084309

Sum of electronic and thermal Free Energies= -1184.171217

Esol= -1185.0489518

---

| Center<br>Number | Atomic<br>Number | Atomic<br>Type | Coordinates (Angstroms) |          |           |
|------------------|------------------|----------------|-------------------------|----------|-----------|
|                  |                  |                | X                       | Y        | Z         |
| 1                | 6                | 0              | 1.406634                | 2.748696 | 1.177580  |
| 2                | 6                | 0              | 1.151944                | 3.412149 | -0.016344 |
| 3                | 6                | 0              | 2.033049                | 4.378761 | -0.517277 |
| 4                | 6                | 0              | 3.179409                | 4.664382 | 0.226798  |
| 5                | 6                | 0              | 3.433861                | 4.007844 | 1.430427  |
| 6                | 6                | 0              | 2.553124                | 3.046018 | 1.910386  |
| 7                | 1                | 0              | 0.706447                | 2.001774 | 1.538684  |
| 8                | 1                | 0              | 0.254316                | 3.174910 | -0.581816 |
| 9                | 1                | 0              | 3.893118                | 5.403076 | -0.126568 |
| 10               | 1                | 0              | 4.328084                | 4.252972 | 1.995348  |
| 11               | 1                | 0              | 2.755321                | 2.534542 | 2.845902  |
| 12               | 6                | 0              | 3.141456                | 6.742174 | -5.306797 |
| 13               | 6                | 0              | 3.634011                | 5.460188 | -4.634578 |
| 14               | 1                | 0              | 3.169731                | 6.632846 | -6.394434 |
| 15               | 1                | 0              | 2.111216                | 6.983802 | -5.032175 |
| 16               | 1                | 0              | 3.777245                | 7.596075 | -5.042259 |
| 17               | 1                | 0              | 2.890452                | 4.671119 | -4.790122 |
| 18               | 6                | 0              | 3.845062                | 5.661469 | -3.122166 |
| 19               | 8                | 0              | 4.295660                | 4.424274 | -2.570946 |
| 20               | 1                | 0              | 4.646786                | 6.407821 | -3.020070 |
| 21               | 5                | 0              | 5.548116                | 4.293875 | -2.083161 |
| 22               | 8                | 0              | 6.068534                | 3.074630 | -1.722084 |
| 23               | 8                | 0              | 6.432242                | 5.339944 | -1.901632 |
| 24               | 6                | 0              | 7.304615                | 3.350384 | -1.037806 |
| 25               | 6                | 0              | 7.715242                | 4.733898 | -1.641779 |
| 26               | 6                | 0              | 8.282958                | 2.219895 | -1.308291 |
| 27               | 1                | 0              | 9.263615                | 2.448590 | -0.878589 |
| 28               | 1                | 0              | 7.912924                | 1.299937 | -0.848987 |
| 29               | 1                | 0              | 8.397435                | 2.044318 | -2.379092 |
| 30               | 6                | 0              | 6.983251                | 3.441590 | 0.452242  |
| 31               | 1                | 0              | 6.465456                | 2.528887 | 0.756719  |
| 32               | 1                | 0              | 7.888661                | 3.557164 | 1.054879  |
| 33               | 1                | 0              | 6.318829                | 4.288744 | 0.647612  |
| 34               | 6                | 0              | 8.509930                | 5.629536 | -0.706733 |
| 35               | 1                | 0              | 9.442230                | 5.139171 | -0.409130 |



|    |   |   |           |          |           |
|----|---|---|-----------|----------|-----------|
| 36 | 1 | 0 | 8.761851  | 6.562433 | -1.217349 |
| 37 | 1 | 0 | 7.937777  | 5.873974 | 0.189446  |
| 38 | 6 | 0 | 8.423813  | 4.597440 | -2.987954 |
| 39 | 1 | 0 | 8.481516  | 5.583048 | -3.456352 |
| 40 | 1 | 0 | 9.437803  | 4.205119 | -2.871595 |
| 41 | 1 | 0 | 7.864398  | 3.932888 | -3.653723 |
| 42 | 6 | 0 | 1.173291  | 4.214448 | -2.917634 |
| 43 | 6 | 0 | 1.716690  | 2.943776 | -3.122614 |
| 44 | 6 | 0 | 0.241234  | 4.702135 | -3.837213 |
| 45 | 6 | 0 | 1.352162  | 2.193249 | -4.236674 |
| 46 | 1 | 0 | 2.447536  | 2.559374 | -2.418984 |
| 47 | 6 | 0 | -0.119788 | 3.956661 | -4.955928 |
| 48 | 1 | 0 | -0.197407 | 5.685815 | -3.679693 |
| 49 | 6 | 0 | 0.440896  | 2.698904 | -5.161414 |
| 50 | 1 | 0 | 1.789962  | 1.211274 | -4.387108 |
| 51 | 1 | 0 | -0.840509 | 4.355614 | -5.662989 |
| 52 | 1 | 0 | 0.163741  | 2.113358 | -6.032252 |
| 53 | 6 | 0 | 2.643791  | 6.169835 | -2.306540 |
| 54 | 1 | 0 | 3.011981  | 6.746717 | -1.451742 |
| 55 | 1 | 0 | 2.094708  | 6.886496 | -2.924425 |
| 56 | 6 | 0 | 4.956359  | 5.005920 | -5.258312 |
| 57 | 1 | 0 | 5.750117  | 5.737674 | -5.059788 |
| 58 | 1 | 0 | 5.272381  | 4.039805 | -4.856246 |
| 59 | 1 | 0 | 4.857248  | 4.901284 | -6.342374 |
| 60 | 6 | 0 | 1.632240  | 5.124109 | -1.787065 |
| 61 | 1 | 0 | 0.749336  | 5.712001 | -1.496553 |

-----

**1,3,5-trimethyl-1,4-cyclohexadiene**

|                                              |             |
|----------------------------------------------|-------------|
| Thermal correction to Energy=                | 0.217385    |
| Thermal correction to Enthalpy=              | 0.218329    |
| Thermal correction to Gibbs Free Energy=     | 0.173125    |
| Sum of electronic and zero-point Energies=   | -351.001801 |
| Sum of electronic and thermal Energies=      | -350.991981 |
| Sum of electronic and thermal Enthalpies=    | -350.991037 |
| Sum of electronic and thermal Free Energies= | -351.036240 |

Esol= -351.3241491

-----

| Center<br>Number | Atomic<br>Number | Atomic<br>Type | Coordinates (Angstroms) |           |           |
|------------------|------------------|----------------|-------------------------|-----------|-----------|
|                  |                  |                | X                       | Y         | Z         |
| 1                | 6                | 0              | -2.478336               | -3.083807 | -0.050790 |

-----

|    |   |   |           |           |           |
|----|---|---|-----------|-----------|-----------|
| 2  | 6 | 0 | -1.077152 | -3.437182 | 0.373414  |
| 3  | 6 | 0 | -0.156642 | -2.257963 | 0.546600  |
| 4  | 6 | 0 | -0.569847 | -1.008019 | 0.338168  |
| 5  | 6 | 0 | -1.967172 | -0.621096 | -0.060452 |
| 6  | 6 | 0 | -2.853855 | -1.820560 | -0.249967 |
| 7  | 1 | 0 | -1.114403 | -4.011664 | 1.313267  |
| 8  | 1 | 0 | -0.640328 | -4.137268 | -0.357169 |
| 9  | 1 | 0 | 0.134633  | -0.188080 | 0.478860  |
| 10 | 1 | 0 | -1.914859 | -0.076679 | -1.016968 |
| 11 | 1 | 0 | -3.880677 | -1.615244 | -0.553243 |
| 12 | 6 | 0 | 1.249227  | -2.586907 | 0.962790  |
| 13 | 1 | 0 | 1.728020  | -3.247316 | 0.230107  |
| 14 | 1 | 0 | 1.859477  | -1.686675 | 1.064275  |
| 15 | 1 | 0 | 1.258125  | -3.119568 | 1.921024  |
| 16 | 6 | 0 | -3.414433 | -4.244883 | -0.233812 |
| 17 | 1 | 0 | -4.406990 | -3.915540 | -0.548885 |
| 18 | 1 | 0 | -3.027659 | -4.942904 | -0.985561 |
| 19 | 1 | 0 | -3.518944 | -4.811814 | 0.698833  |
| 20 | 6 | 0 | -2.576587 | 0.344454  | 0.970642  |
| 21 | 1 | 0 | -1.958801 | 1.240930  | 1.080565  |
| 22 | 1 | 0 | -3.580226 | 0.657818  | 0.667575  |
| 23 | 1 | 0 | -2.648888 | -0.146190 | 1.945218  |

**1,3,5-trimethyl-1,4-cyclohexadiene radical**

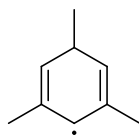

|                                              |             |
|----------------------------------------------|-------------|
| Thermal correction to Energy=                | 0.203695    |
| Thermal correction to Enthalpy=              | 0.204639    |
| Thermal correction to Gibbs Free Energy=     | 0.158675    |
| Sum of electronic and zero-point Energies=   | -350.382037 |
| Sum of electronic and thermal Energies=      | -350.372200 |
| Sum of electronic and thermal Enthalpies=    | -350.371256 |
| Sum of electronic and thermal Free Energies= | -350.417220 |

Esol= -350.6914158

| Center Number | Atomic Number | Atomic Type | Coordinates (Angstroms) |           |          |
|---------------|---------------|-------------|-------------------------|-----------|----------|
|               |               |             | X                       | Y         | Z        |
| 1             | 6             | 0           | -2.467755               | -3.070503 | 0.010505 |
| 2             | 6             | 0           | -1.132401               | -3.323330 | 0.430678 |

|    |   |   |           |           |           |
|----|---|---|-----------|-----------|-----------|
| 3  | 6 | 0 | -0.198019 | -2.263031 | 0.593925  |
| 4  | 6 | 0 | -0.584902 | -0.980235 | 0.353573  |
| 5  | 6 | 0 | -1.976058 | -0.600182 | -0.055350 |
| 6  | 6 | 0 | -2.867156 | -1.792212 | -0.233147 |
| 7  | 1 | 0 | -0.818412 | -4.346064 | 0.624092  |
| 8  | 1 | 0 | 0.129980  | -0.169413 | 0.481289  |
| 9  | 1 | 0 | -1.921744 | -0.058470 | -1.017605 |
| 10 | 1 | 0 | -3.890095 | -1.598544 | -0.551129 |
| 11 | 6 | 0 | 1.206245  | -2.594788 | 1.031046  |
| 12 | 1 | 0 | 1.683179  | -3.278581 | 0.321756  |
| 13 | 1 | 0 | 1.822639  | -1.696394 | 1.105835  |
| 14 | 1 | 0 | 1.203385  | -3.090064 | 2.007236  |
| 15 | 6 | 0 | -3.409979 | -4.236106 | -0.152746 |
| 16 | 1 | 0 | -4.390930 | -3.908654 | -0.503497 |
| 17 | 1 | 0 | -3.013443 | -4.959826 | -0.871653 |
| 18 | 1 | 0 | -3.545009 | -4.762859 | 0.797262  |
| 19 | 6 | 0 | -2.590517 | 0.395100  | 0.955651  |
| 20 | 1 | 0 | -1.965682 | 1.288430  | 1.047651  |
| 21 | 1 | 0 | -3.589461 | 0.705012  | 0.634778  |
| 22 | 1 | 0 | -2.672118 | -0.075217 | 1.938845  |

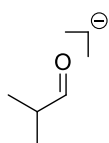

|                                              |             |
|----------------------------------------------|-------------|
| Thermal correction to Energy=                | 0.116177    |
| Thermal correction to Enthalpy=              | 0.117121    |
| Thermal correction to Gibbs Free Energy=     | 0.080047    |
| Sum of electronic and zero-point Energies=   | -232.180257 |
| Sum of electronic and thermal Energies=      | -232.173929 |
| Sum of electronic and thermal Enthalpies=    | -232.172985 |
| Sum of electronic and thermal Free Energies= | -232.210059 |

Esol = -232.4455291

| Center<br>Number | Atomic<br>Number | Atomic<br>Type | Coordinates (Angstroms) |           |           |
|------------------|------------------|----------------|-------------------------|-----------|-----------|
|                  |                  |                | X                       | Y         | Z         |
| 1                | 6                | 0              | -0.481495               | -0.914189 | 0.029711  |
| 2                | 6                | 0              | 1.038664                | -0.794838 | -0.004034 |
| 3                | 1                | 0              | 1.326884                | -0.287246 | -0.943465 |
| 4                | 1                | 0              | -0.934636               | 0.083587  | 0.068246  |

|    |   |   |           |           |           |
|----|---|---|-----------|-----------|-----------|
| 5  | 1 | 0 | -0.892060 | -1.458740 | -0.831177 |
| 6  | 1 | 0 | -0.789081 | -1.445542 | 0.940568  |
| 7  | 6 | 0 | 1.708022  | -2.176887 | -0.034933 |
| 8  | 1 | 0 | 2.783368  | -2.012110 | 0.085794  |
| 9  | 1 | 0 | 1.361631  | -2.774089 | 0.820253  |
| 10 | 1 | 0 | 1.520169  | -2.753154 | -0.956399 |
| 11 | 6 | 0 | 1.567280  | 0.036301  | 1.164904  |
| 12 | 8 | 0 | 2.846935  | 0.192151  | 1.270741  |
| 13 | 1 | 0 | 0.946459  | -0.140211 | 2.090998  |

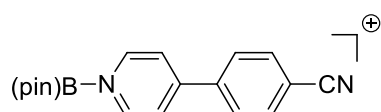

|                                              |             |
|----------------------------------------------|-------------|
| Thermal correction to Energy=                | 0.378019    |
| Thermal correction to Enthalpy=              | 0.378964    |
| Thermal correction to Gibbs Free Energy=     | 0.306909    |
| Sum of electronic and zero-point Energies=   | -981.942635 |
| Sum of electronic and thermal Energies=      | -981.921989 |
| Sum of electronic and thermal Enthalpies=    | -981.921045 |
| Sum of electronic and thermal Free Energies= | -981.993099 |

Esol = -982.6663108

| Center Number | Atomic Number | Atomic Type | Coordinates (Angstroms) |           |           |
|---------------|---------------|-------------|-------------------------|-----------|-----------|
|               |               |             | X                       | Y         | Z         |
| 1             | 6             | 0           | 2.308613                | 1.176440  | -0.025872 |
| 2             | 6             | 0           | 3.683267                | 1.203041  | -0.028043 |
| 3             | 6             | 0           | 3.683325                | -1.202825 | 0.027986  |
| 4             | 6             | 0           | 2.308670                | -1.176289 | 0.025824  |
| 5             | 7             | 0           | 1.637767                | 0.000060  | -0.000022 |
| 6             | 1             | 0           | 1.691482                | 2.067915  | -0.034890 |
| 7             | 1             | 0           | 4.190354                | 2.160410  | -0.019439 |
| 8             | 1             | 0           | 4.190456                | -2.160170 | 0.019379  |
| 9             | 1             | 0           | 1.691580                | -2.067793 | 0.034846  |
| 10            | 5             | 0           | 0.133157                | 0.000023  | -0.000019 |
| 11            | 8             | 0           | -0.551874               | -1.149754 | 0.078789  |
| 12            | 8             | 0           | -0.551930               | 1.149768  | -0.078826 |
| 13            | 6             | 0           | -1.949934               | -0.762072 | -0.189926 |
| 14            | 6             | 0           | -1.949972               | 0.762017  | 0.189885  |
| 15            | 6             | 0           | -2.861563               | -1.626398 | 0.658903  |
| 16            | 1             | 0           | -3.897789               | -1.293583 | 0.548858  |

|    |   |   |           |           |           |
|----|---|---|-----------|-----------|-----------|
| 17 | 1 | 0 | -2.801065 | -2.663822 | 0.323545  |
| 18 | 1 | 0 | -2.589208 | -1.586125 | 1.714059  |
| 19 | 6 | 0 | -2.178469 | -1.012203 | -1.674921 |
| 20 | 1 | 0 | -1.962401 | -2.059191 | -1.897243 |
| 21 | 1 | 0 | -3.216512 | -0.809313 | -1.948108 |
| 22 | 1 | 0 | -1.529373 | -0.384101 | -2.292383 |
| 23 | 6 | 0 | -2.861641 | 1.626298  | -0.658946 |
| 24 | 1 | 0 | -3.897851 | 1.293430  | -0.548906 |
| 25 | 1 | 0 | -2.801197 | 2.663724  | -0.323588 |
| 26 | 1 | 0 | -2.589280 | 1.586039  | -1.714101 |
| 27 | 6 | 0 | -2.178523 | 1.012136  | 1.674880  |
| 28 | 1 | 0 | -1.962501 | 2.059134  | 1.897203  |
| 29 | 1 | 0 | -3.216558 | 0.809200  | 1.948063  |
| 30 | 1 | 0 | -1.529401 | 0.384062  | 2.292343  |
| 31 | 6 | 0 | 4.412200  | 0.000126  | -0.000031 |
| 32 | 6 | 0 | 5.884457  | 0.000160  | -0.000036 |
| 33 | 6 | 0 | 6.590051  | 0.992793  | -0.694095 |
| 34 | 6 | 0 | 6.590103  | -0.992439 | 0.694017  |
| 35 | 6 | 0 | 7.976004  | 0.991169  | -0.702972 |
| 36 | 1 | 0 | 6.057228  | 1.748483  | -1.262383 |
| 37 | 6 | 0 | 7.976057  | -0.990748 | 0.702885  |
| 38 | 1 | 0 | 6.057320  | -1.748155 | 1.262308  |
| 39 | 6 | 0 | 8.669834  | 0.000227  | -0.000046 |
| 40 | 1 | 0 | 8.526415  | 1.746899  | -1.251499 |
| 41 | 1 | 0 | 8.526507  | -1.746453 | 1.251409  |
| 42 | 6 | 0 | 10.108893 | 0.000263  | -0.000051 |
| 43 | 7 | 0 | 11.265168 | 0.000294  | -0.000055 |

---

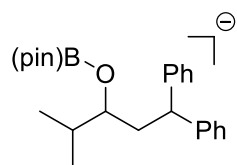

|                                              |              |
|----------------------------------------------|--------------|
| Thermal correction to Energy=                | 0.546336     |
| Thermal correction to Enthalpy=              | 0.547281     |
| Thermal correction to Gibbs Free Energy=     | 0.461425     |
| Sum of electronic and zero-point Energies=   | -1183.525814 |
| Sum of electronic and thermal Energies=      | -1183.498530 |
| Sum of electronic and thermal Enthalpies=    | -1183.497586 |
| Sum of electronic and thermal Free Energies= | -1183.583442 |

Esol = -1184.4918736

| Center<br>Number | Atomic<br>Number | Atomic<br>Type | Coordinates (Angstroms) |          |           |
|------------------|------------------|----------------|-------------------------|----------|-----------|
|                  |                  |                | X                       | Y        | Z         |
| 1                | 6                | 0              | 1.537652                | 2.769267 | 1.141237  |
| 2                | 6                | 0              | 1.377834                | 3.243755 | -0.146052 |
| 3                | 6                | 0              | 2.370507                | 4.032547 | -0.820339 |
| 4                | 6                | 0              | 3.529895                | 4.293263 | -0.016742 |
| 5                | 6                | 0              | 3.662333                | 3.827007 | 1.284763  |
| 6                | 6                | 0              | 2.685711                | 3.042503 | 1.894682  |
| 7                | 1                | 0              | 0.729951                | 2.187072 | 1.583222  |
| 8                | 1                | 0              | 0.436492                | 3.051641 | -0.648532 |
| 9                | 1                | 0              | 4.338047                | 4.897303 | -0.416387 |
| 10               | 1                | 0              | 4.563083                | 4.088965 | 1.841261  |
| 11               | 1                | 0              | 2.804656                | 2.669447 | 2.906755  |
| 12               | 6                | 0              | 2.169619                | 4.602844 | -2.112162 |
| 13               | 6                | 0              | 3.166338                | 6.151425 | -5.710914 |
| 14               | 6                | 0              | 3.712080                | 4.917065 | -4.993198 |
| 15               | 1                | 0              | 2.850807                | 5.889252 | -6.725801 |
| 16               | 1                | 0              | 2.302969                | 6.581060 | -5.201672 |
| 17               | 1                | 0              | 3.942573                | 6.923908 | -5.791721 |
| 18               | 1                | 0              | 2.909592                | 4.176474 | -4.890771 |
| 19               | 6                | 0              | 4.200831                | 5.263941 | -3.580188 |
| 20               | 8                | 0              | 4.891957                | 4.104042 | -3.096816 |
| 21               | 1                | 0              | 4.934915                | 6.084969 | -3.673169 |
| 22               | 5                | 0              | 5.974451                | 4.198564 | -2.315905 |
| 23               | 8                | 0              | 6.831309                | 3.131739 | -2.108822 |
| 24               | 8                | 0              | 6.409916                | 5.353350 | -1.680540 |
| 25               | 6                | 0              | 7.723761                | 3.510068 | -1.056175 |
| 26               | 6                | 0              | 7.708531                | 5.077530 | -1.143796 |
| 27               | 6                | 0              | 9.084864                | 2.878492 | -1.313361 |
| 28               | 1                | 0              | 9.813986                | 3.213079 | -0.567319 |
| 29               | 1                | 0              | 8.995792                | 1.791285 | -1.243494 |
| 30               | 1                | 0              | 9.456467                | 3.127400 | -2.308876 |
| 31               | 6                | 0              | 7.132364                | 2.980604 | 0.248015  |
| 32               | 1                | 0              | 7.029737                | 1.895584 | 0.166106  |
| 33               | 1                | 0              | 7.768117                | 3.211186 | 1.108614  |
| 34               | 1                | 0              | 6.132835                | 3.391585 | 0.411131  |
| 35               | 6                | 0              | 7.841867                | 5.786149 | 0.195330  |
| 36               | 1                | 0              | 8.788013                | 5.525046 | 0.681764  |
| 37               | 1                | 0              | 7.819407                | 6.868229 | 0.040232  |
| 38               | 1                | 0              | 7.014751                | 5.518569 | 0.855744  |
| 39               | 6                | 0              | 8.728044                | 5.622884 | -2.144191 |
| 40               | 1                | 0              | 8.528453                | 6.686043 | -2.300373 |

|    |   |   |           |          |           |
|----|---|---|-----------|----------|-----------|
| 41 | 1 | 0 | 9.754813  | 5.505591 | -1.784599 |
| 42 | 1 | 0 | 8.629615  | 5.111912 | -3.106672 |
| 43 | 6 | 0 | 1.080389  | 4.217900 | -2.979988 |
| 44 | 6 | 0 | 0.604896  | 2.878006 | -3.082001 |
| 45 | 6 | 0 | 0.427120  | 5.138316 | -3.848182 |
| 46 | 6 | 0 | -0.412283 | 2.509623 | -3.947197 |
| 47 | 1 | 0 | 1.094227  | 2.114062 | -2.486032 |
| 48 | 6 | 0 | -0.585088 | 4.762376 | -4.719319 |
| 49 | 1 | 0 | 0.701422  | 6.188229 | -3.802048 |
| 50 | 6 | 0 | -1.029138 | 3.441767 | -4.786251 |
| 51 | 1 | 0 | -0.715490 | 1.464783 | -3.986453 |
| 52 | 1 | 0 | -1.048096 | 5.521662 | -5.347588 |
| 53 | 1 | 0 | -1.821638 | 3.147822 | -5.467484 |
| 54 | 6 | 0 | 3.101673  | 5.694310 | -2.584045 |
| 55 | 1 | 0 | 3.611246  | 6.157515 | -1.731601 |
| 56 | 1 | 0 | 2.563972  | 6.525194 | -3.062673 |
| 57 | 6 | 0 | 4.846746  | 4.311025 | -5.822298 |
| 58 | 1 | 0 | 5.685033  | 5.017661 | -5.895711 |
| 59 | 1 | 0 | 5.218605  | 3.389507 | -5.372966 |
| 60 | 1 | 0 | 4.506061  | 4.093588 | -6.840246 |

---

## 7. References

- [1]. Gaussian 09, Revision D.01, M. J. Frisch, G. W. Trucks, H. B. Schlegel, G. E. Scuseria, M. A. Robb, J. R. Cheeseman, G. Scalmani, V. Barone, B. Mennucci, G. A. Petersson, H. Nakatsuji, M. Caricato, X. Li, H. P. Hratchian, A. F. Izmaylov, J. Bloino, G. Zheng, J. L. Sonnenberg, M. Hada, M. Ehara, K. Toyota, R. Fukuda, J. Hasegawa, M. Ishida, T. Nakajima, Y. Honda, O. Kitao, H. Nakai, T. Vreven, J. A. Montgomery, Jr., J. E. Peralta, F. Ogliaro, M. Bearpark, J. J. Heyd, E. Brothers, K. N. Kudin, V. N. Staroverov, T. Keith, R. Kobayashi, J. Normand, K. Raghavachari, A. Rendell, J. C. Burant, S. S. Iyengar, J. Tomasi, M. Cossi, N. Rega, J. M. Millam, M. Klene, J. E. Knox, J. B. Cross, V. Bakken, C. Adamo, J. Jaramillo, R. Gomperts, R. E. Stratmann, O. Yazyev, A. J. Austin, R. Cammi, C. Pomelli, J. W. Ochterski, R. L. Martin, K. Morokuma, V. G. Zakrzewski, G. A. Voth, P. Salvador, J. J. Dannenberg, S. Dapprich, A. D. Daniels, O. Farkas, J. B. Foresman, J. V. Ortiz, J. Cioslowski, and D. J. Fox, Gaussian, Inc., Wallingford CT, 2013.
- [2]. a) Y. Zhao, N. E. Schultz, D. G. Truhlar, *J. Chem. Theory. Comput.* **2006**, 2, 364; b) Y. Zhao, D. G. Truhlar, *J. Chem. Phys.* **2006**, 125, 194101; c) Y. Zhao, D. G. Truhlar, *J. Phys. Chem. A* **2006**, 110, 13126.
- [3]. C. Gonzalez, H. B. Schlegel, *J. Chem. Phys.* **1989**, 90, 2154.
- [4]. J. Tomasi, M. Persico, *Chem. Rev.* **1994**, 94, 2027.

- [5]. CYLview, 1.0b ; C. Y. Legault, Université de Sherbrooke, **2009**  
(<http://www.cylview.org>)
- [6]. D. P. Chen, G. Q. Xu, Q. H. Zhou, L. W. Chung, W. J. Tang, *J. Am. Chem. Soc.* **2017**, *139*, 9767.
- [7]. G. Wang, H. Zhang, J. Zhao, W. Li, J. Cao, C. Zhu and S. Li, *Angew. Chem, Int. Ed.* **2016**, *55*, 5985.
- [8]. S. Mukherjee, R. A. Garza-Sanchez, A. Tlahuext-Aca, F. Glorius, *Angew. Chem. Int. Ed.* **2017**, *56*, 1.
- [9]. T. Wang, Y. Hu, S. Zhang, *Org. Biomol. Chem.* **2008**, *8*, 2312.
- [10]. V. J. Cee, J. Lin, Z. Zhang, US 2012/0129828 A1, **2012**.
- [11]. G. Z. Wang, X. -L. Li, J. J. Dai, H. J. Xu, *J. Org. Chem.* **2014**, *79*, 7220.
- [12]. K. Tatani, M. Hiratochi, N. Kikuchi, Y. Kuramochi, S. Watanabe, Y. Yamauchi, F. Itoh, M. Lsaji, S. Shuto. *J. Med. Chem.* **2016**, *9*, 3719.
- [13]. G. Wang, J. Cao, L. Gao, W. Chen, W. Huang, X. Cheng, S. Li, *J. Am. Chem. Soc.* **2017**, *139*, 3904.
- [14]. R. Shintani, K. Nozaki. *Organometallics.* **2013**, *32*, 2459–2462; D. S. Laitar, E. Y. Tsui, J. P. Sadighi. *J. Am. Chem. Soc.* **2006**, *128*, 11036.
- [15]. Y. -L. Zheng, Y. -Y. Liu, Y. -M. Wu, Y. -X. Wang, Y. -T. Lin, M. Ye. *Angew. Chem. Int. Ed.* **2016**, *55*, 6315. *Angew. Chem.* **2016**, *128*, 6423.
